# Supplementary material for: High resolution spectroscopy and the first global analysis of the Tetradecad region of methane 12CH4
Source: Royal Society of Chemistry journal article supplement (doi:10.1039/c3cp50799h), 2013-01-01
Supplement: c3cp50799h.pdf [file c3cp50799h.pdf]

High resolution spectroscopy and first global analysis of the Tetradecad region of  
methane  $^{12}\text{CH}_4$   
Electronic supplement for PCCP xxx (2013) xxx–xxx  
DOI: 10.1039/b000000x

A. V. Nikitin,<sup>\*a,b</sup> V. Boudon,<sup>\*c</sup> Ch. Wenger,<sup>c</sup> S. Albert,<sup>d</sup>  
L. R. Brown,<sup>e</sup> S. Bauerecker,<sup>d,f</sup> and M. Quack<sup>\*d</sup>

<sup>a</sup> *Laboratory of Theoretical Spectroscopy, Institute of Atmospheric,  
Optics, Russian Academy of Sciences, 634055 Tomsk, Russia.*

<sup>b</sup> *Laboratoire GSMA, UMR 6089 CNRS-Université de Reims Champagne Ardenne,  
Moulin de la Housse, BP 1039, Cases 16-17, F-51687 Reims Cedex 2, France.*

<sup>c</sup> *Laboratoire Interdisciplinaire Carnot de Bourgogne, UMR 6303 CNRS-Université de Bourgogne,  
9 avenue Alain Savary, B.P. 47870, F-21078 Dijon Cedex, France.; E-mail: @u-bourgogne.fr*

<sup>d</sup> *Physical Chemistry, ETH Zürich, CH-8093 Zürich, Switzerland.*

<sup>e</sup> *Jet Propulsion Laboratory, California Institute of Technology,  
4800 Oak Grove Drive, Pasadena, California 91109, USA.*

<sup>f</sup> *Institut für Physikalische und Theoretische Chemie, Technische Universität Braunschweig, D-38106, Germany.*

The supplementary tables contain the effective Hamiltonian parameters and the complete lists of observed transitions, with positions and intensities compared to calculation.

**TABLE A I:** Effective Hamiltonian parameters up to the Tetradecad. Standard deviation is indicated in parentheses in the unit of the last two digits; no standard deviation indicates that the parameter is fixed.

Page 2

**TABLE A II:** Experimental (*e*) and calculated (*c*) line positions for the Tetradecad–GS transitions, with assignments. The first column gives the experimental wavenumber  $\tilde{\nu}_e$ , the second the calculated wavenumber  $\tilde{\nu}_c$ , the third the experimental minus calculated wavenumber difference  $\tilde{\nu}_e - \tilde{\nu}_c$  and the last columns give the assignments in terms of rotational quantum numbers *J*, *T<sub>d</sub>* symmetries *C* and multiplicity indexes  $\alpha$ . Primes (') stand for upper state levels and double primes (") for lower state levels (see text for detailed notations).

Page 25

Table I.

| Parameter | Polyad | Order | $\Omega(K, nC)$        | $\{s\} C_1$        | $\{s'\} C_2$       | Value / $\text{cm}^{-1}$         |
|-----------|--------|-------|------------------------|--------------------|--------------------|----------------------------------|
| 1         | GS     | 0     | 2(0, 0A <sub>1</sub> ) | 0000A <sub>1</sub> | 0000A <sub>1</sub> | 5.2410445(13)                    |
| 2         | GS     | 2     | 4(0, 0A <sub>1</sub> ) | 0000A <sub>1</sub> | 0000A <sub>1</sub> | -1.11018(11) × 10 <sup>-4</sup>  |
| 3         | GS     | 2     | 4(4, 0A <sub>1</sub> ) | 0000A <sub>1</sub> | 0000A <sub>1</sub> | -3.036065(35) × 10 <sup>-6</sup> |
| 4         | GS     | 4     | 6(0, 0A <sub>1</sub> ) | 0000A <sub>1</sub> | 0000A <sub>1</sub> | 6.369(35) × 10 <sup>-9</sup>     |
| 5         | GS     | 4     | 6(4, 0A <sub>1</sub> ) | 0000A <sub>1</sub> | 0000A <sub>1</sub> | -1.6778(14) × 10 <sup>-10</sup>  |
| 6         | GS     | 4     | 6(6, 0A <sub>1</sub> ) | 0000A <sub>1</sub> | 0000A <sub>1</sub> | -6.1643(27) × 10 <sup>-11</sup>  |
| 7         | GS     | 6     | 8(0, 0A <sub>1</sub> ) | 0000A <sub>1</sub> | 0000A <sub>1</sub> | -5.22(39) × 10 <sup>-13</sup>    |
| 8         | GS     | 6     | 8(4, 0A <sub>1</sub> ) | 0000A <sub>1</sub> | 0000A <sub>1</sub> | -8.51(14) × 10 <sup>-15</sup>    |
| 9         | GS     | 6     | 8(6, 0A <sub>1</sub> ) | 0000A <sub>1</sub> | 0000A <sub>1</sub> | -6.204(43) × 10 <sup>-15</sup>   |
| 10        | GS     | 6     | 8(8, 0A <sub>1</sub> ) | 0000A <sub>1</sub> | 0000A <sub>1</sub> | -5.06(14) × 10 <sup>-16</sup>    |
| 11        | Dyad   | 0     | 0(0, 0A <sub>1</sub> ) | 0100E              | 0100E              | 1533.332557(30)                  |
| 12        | Dyad   | 2     | 2(0, 0A <sub>1</sub> ) | 0100E              | 0100E              | -1.303(22) × 10 <sup>-2</sup>    |
| 13        | Dyad   | 2     | 2(2, 0E)               | 0100E              | 0100E              | -3.642(19) × 10 <sup>-2</sup>    |
| 14        | Dyad   | 3     | 3(3, 0A <sub>2</sub> ) | 0100E              | 0100E              | -5.463(30) × 10 <sup>-4</sup>    |
| 15        | Dyad   | 4     | 4(0, 0A <sub>1</sub> ) | 0100E              | 0100E              | -8.61(25) × 10 <sup>-6</sup>     |
| 16        | Dyad   | 4     | 4(2, 0E)               | 0100E              | 0100E              | -4.2(1.2) × 10 <sup>-7</sup>     |
| 17        | Dyad   | 4     | 4(4, 0A <sub>1</sub> ) | 0100E              | 0100E              | 2.850(56) × 10 <sup>-6</sup>     |
| 18        | Dyad   | 4     | 4(4, 0E)               | 0100E              | 0100E              | -4.674(96) × 10 <sup>-6</sup>    |
| 19        | Dyad   | 5     | 5(3, 0A <sub>2</sub> ) | 0100E              | 0100E              | 7.81(74) × 10 <sup>-9</sup>      |
| 20        | Dyad   | 6     | 6(0, 0A <sub>1</sub> ) | 0100E              | 0100E              | -2.37(10) × 10 <sup>-9</sup>     |
| 21        | Dyad   | 6     | 6(2, 0E)               | 0100E              | 0100E              | 0.0                              |
| 22        | Dyad   | 6     | 6(4, 0A <sub>1</sub> ) | 0100E              | 0100E              | -3.00(12) × 10 <sup>-10</sup>    |
| 23        | Dyad   | 6     | 6(4, 0E)               | 0100E              | 0100E              | -5.76(21) × 10 <sup>-10</sup>    |
| 24        | Dyad   | 6     | 6(6, 0A <sub>1</sub> ) | 0100E              | 0100E              | -1.676(84) × 10 <sup>-10</sup>   |
| 25        | Dyad   | 6     | 6(6, 0E)               | 0100E              | 0100E              | 4.301(95) × 10 <sup>-10</sup>    |
| 26        | Dyad   | 1     | 1(1, 0F <sub>1</sub> ) | 0100E              | 0001F <sub>2</sub> | -9.980(11)                       |
| 27        | Dyad   | 2     | 2(2, 0F <sub>2</sub> ) | 0100E              | 0001F <sub>2</sub> | -2.25(30) × 10 <sup>-3</sup>     |
| 28        | Dyad   | 3     | 3(1, 0F <sub>1</sub> ) | 0100E              | 0001F <sub>2</sub> | 3.353(63) × 10 <sup>-4</sup>     |
| 29        | Dyad   | 3     | 3(3, 0F <sub>1</sub> ) | 0100E              | 0001F <sub>2</sub> | 7.958(51) × 10 <sup>-4</sup>     |
| 30        | Dyad   | 3     | 3(3, 0F <sub>2</sub> ) | 0100E              | 0001F <sub>2</sub> | 5.778(58) × 10 <sup>-4</sup>     |
| 31        | Dyad   | 4     | 4(2, 0F <sub>2</sub> ) | 0100E              | 0001F <sub>2</sub> | -6.086(95) × 10 <sup>-6</sup>    |
| 32        | Dyad   | 4     | 4(4, 0F <sub>1</sub> ) | 0100E              | 0001F <sub>2</sub> | 1.678(84) × 10 <sup>-6</sup>     |
| 33        | Dyad   | 4     | 4(4, 0F <sub>2</sub> ) | 0100E              | 0001F <sub>2</sub> | 1.149(70) × 10 <sup>-6</sup>     |
| 34        | Dyad   | 5     | 5(1, 0F <sub>1</sub> ) | 0100E              | 0001F <sub>2</sub> | 3.209(99) × 10 <sup>-8</sup>     |
| 35        | Dyad   | 5     | 5(3, 0F <sub>1</sub> ) | 0100E              | 0001F <sub>2</sub> | 6.399(86) × 10 <sup>-8</sup>     |
| 36        | Dyad   | 5     | 5(3, 0F <sub>2</sub> ) | 0100E              | 0001F <sub>2</sub> | 8.33(18) × 10 <sup>-8</sup>      |
| 37        | Dyad   | 5     | 5(5, 0F <sub>1</sub> ) | 0100E              | 0001F <sub>2</sub> | 0.0                              |
| 38        | Dyad   | 5     | 5(5, 1F <sub>1</sub> ) | 0100E              | 0001F <sub>2</sub> | -3.081(83) × 10 <sup>-8</sup>    |
| 39        | Dyad   | 5     | 5(5, 0F <sub>2</sub> ) | 0100E              | 0001F <sub>2</sub> | -3.280(99) × 10 <sup>-8</sup>    |
| 40        | Dyad   | 6     | 6(2, 0F <sub>2</sub> ) | 0100E              | 0001F <sub>2</sub> | -1.210(30) × 10 <sup>-9</sup>    |
| 41        | Dyad   | 6     | 6(4, 0F <sub>1</sub> ) | 0100E              | 0001F <sub>2</sub> | 6.90(23) × 10 <sup>-10</sup>     |
| 42        | Dyad   | 6     | 6(4, 0F <sub>2</sub> ) | 0100E              | 0001F <sub>2</sub> | 3.09(20) × 10 <sup>-10</sup>     |
| 43        | Dyad   | 6     | 6(6, 0F <sub>1</sub> ) | 0100E              | 0001F <sub>2</sub> | -2.59(22) × 10 <sup>-10</sup>    |
| 44        | Dyad   | 6     | 6(6, 0F <sub>2</sub> ) | 0100E              | 0001F <sub>2</sub> | 0.0                              |
| 45        | Dyad   | 6     | 6(6, 1F <sub>2</sub> ) | 0100E              | 0001F <sub>2</sub> | 2.50(12) × 10 <sup>-10</sup>     |
| 46        | Dyad   | 0     | 0(0, 0A <sub>1</sub> ) | 0001F <sub>2</sub> | 0001F <sub>2</sub> | 1310.761373(25)                  |
| 47        | Dyad   | 1     | 1(1, 0F <sub>1</sub> ) | 0001F <sub>2</sub> | 0001F <sub>2</sub> | 10.36191(24)                     |
| 48        | Dyad   | 2     | 2(0, 0A <sub>1</sub> ) | 0001F <sub>2</sub> | 0001F <sub>2</sub> | 3.08(15) × 10 <sup>-3</sup>      |
| 49        | Dyad   | 2     | 2(2, 0E)               | 0001F <sub>2</sub> | 0001F <sub>2</sub> | -1.599(22) × 10 <sup>-2</sup>    |
| 50        | Dyad   | 2     | 2(2, 0F <sub>2</sub> ) | 0001F <sub>2</sub> | 0001F <sub>2</sub> | -2.394(17) × 10 <sup>-2</sup>    |
| 51        | Dyad   | 3     | 3(1, 0F <sub>1</sub> ) | 0001F <sub>2</sub> | 0001F <sub>2</sub> | 1.0502(44) × 10 <sup>-3</sup>    |
| 52        | Dyad   | 3     | 3(3, 0F <sub>1</sub> ) | 0001F <sub>2</sub> | 0001F <sub>2</sub> | 7.014(42) × 10 <sup>-4</sup>     |
| 53        | Dyad   | 4     | 4(0, 0A <sub>1</sub> ) | 0001F <sub>2</sub> | 0001F <sub>2</sub> | 3.00(17) × 10 <sup>-6</sup>      |
| 54        | Dyad   | 4     | 4(2, 0E)               | 0001F <sub>2</sub> | 0001F <sub>2</sub> | 9.8(1.3) × 10 <sup>-7</sup>      |
| 55        | Dyad   | 4     | 4(2, 0F <sub>2</sub> ) | 0001F <sub>2</sub> | 0001F <sub>2</sub> | -8.70(12) × 10 <sup>-6</sup>     |
| 56        | Dyad   | 4     | 4(4, 0A <sub>1</sub> ) | 0001F <sub>2</sub> | 0001F <sub>2</sub> | -2.446(47) × 10 <sup>-6</sup>    |
| 57        | Dyad   | 4     | 4(4, 0E)               | 0001F <sub>2</sub> | 0001F <sub>2</sub> | -5.08(13) × 10 <sup>-6</sup>     |
| 58        | Dyad   | 4     | 4(4, 0F <sub>2</sub> ) | 0001F <sub>2</sub> | 0001F <sub>2</sub> | -2.88(10) × 10 <sup>-6</sup>     |
| 59        | Dyad   | 5     | 5(1, 0F <sub>1</sub> ) | 0001F <sub>2</sub> | 0001F <sub>2</sub> | 1.5(1.1) × 10 <sup>-9</sup>      |
| 60        | Dyad   | 5     | 5(3, 0F <sub>1</sub> ) | 0001F <sub>2</sub> | 0001F <sub>2</sub> | 4.6(1.2) × 10 <sup>-9</sup>      |
| 61        | Dyad   | 5     | 5(5, 0F <sub>1</sub> ) | 0001F <sub>2</sub> | 0001F <sub>2</sub> | 1.80(11) × 10 <sup>-8</sup>      |
| 62        | Dyad   | 5     | 5(5, 1F <sub>1</sub> ) | 0001F <sub>2</sub> | 0001F <sub>2</sub> | 0.0                              |
| 63        | Dyad   | 6     | 6(0, 0A <sub>1</sub> ) | 0001F <sub>2</sub> | 0001F <sub>2</sub> | 1.974(70) × 10 <sup>-9</sup>     |
| 64        | Dyad   | 6     | 6(2, 0E)               | 0001F <sub>2</sub> | 0001F <sub>2</sub> | 1.12(28) × 10 <sup>-10</sup>     |
| 65        | Dyad   | 6     | 6(2, 0F <sub>2</sub> ) | 0001F <sub>2</sub> | 0001F <sub>2</sub> | -7.32(27) × 10 <sup>-10</sup>    |
| 66        | Dyad   | 6     | 6(4, 0A <sub>1</sub> ) | 0001F <sub>2</sub> | 0001F <sub>2</sub> | 1.61(10) × 10 <sup>-10</sup>     |
| 67        | Dyad   | 6     | 6(4, 0E)               | 0001F <sub>2</sub> | 0001F <sub>2</sub> | -2.03(38) × 10 <sup>-10</sup>    |
| 68        | Dyad   | 6     | 6(4, 0F <sub>2</sub> ) | 0001F <sub>2</sub> | 0001F <sub>2</sub> | -6.12(45) × 10 <sup>-10</sup>    |
| 69        | Dyad   | 6     | 6(6, 0A <sub>1</sub> ) | 0001F <sub>2</sub> | 0001F <sub>2</sub> | 1.641(76) × 10 <sup>-10</sup>    |
| 70        | Dyad   | 6     | 6(6, 0E)               | 0001F <sub>2</sub> | 0001F <sub>2</sub> | 1.73(17) × 10 <sup>-10</sup>     |
| 71        | Dyad   | 6     | 6(6, 0F <sub>2</sub> ) | 0001F <sub>2</sub> | 0001F <sub>2</sub> | 8.64(34) × 10 <sup>-10</sup>     |
| 72        | Dyad   | 6     | 6(6, 1F <sub>2</sub> ) | 0001F <sub>2</sub> | 0001F <sub>2</sub> | -3.2(1.9) × 10 <sup>-11</sup>    |
| 73        | Pentad | 0     | 0(0, 0A <sub>1</sub> ) | 1000A <sub>1</sub> | 1000A <sub>1</sub> | 2932.12(11)                      |
| 74        | Pentad | 2     | 2(0, 0A <sub>1</sub> ) | 1000A <sub>1</sub> | 1000A <sub>1</sub> | -3.521(22) × 10 <sup>-2</sup>    |
| 75        | Pentad | 4     | 4(0, 0A <sub>1</sub> ) | 1000A <sub>1</sub> | 1000A <sub>1</sub> | 5.65(15) × 10 <sup>-6</sup>      |
| 76        | Pentad | 4     | 4(4, 0A <sub>1</sub> ) | 1000A <sub>1</sub> | 1000A <sub>1</sub> | -9.86(30) × 10 <sup>-7</sup>     |
| 77        | Pentad | 2     | 2(2, 0F <sub>2</sub> ) | 1000A <sub>1</sub> | 0010F <sub>2</sub> | 3.456(29) × 10 <sup>-2</sup>     |
| 78        | Pentad | 3     | 3(3, 0F <sub>2</sub> ) | 1000A <sub>1</sub> | 0010F <sub>2</sub> | 5.900(52) × 10 <sup>-4</sup>     |
| 79        | Pentad | 4     | 4(2, 0F <sub>2</sub> ) | 1000A <sub>1</sub> | 0010F <sub>2</sub> | 3.146(85) × 10 <sup>-6</sup>     |
| 80        | Pentad | 4     | 4(4, 0F <sub>2</sub> ) | 1000A <sub>1</sub> | 0010F <sub>2</sub> | 2.131(83) × 10 <sup>-6</sup>     |

Table I (continued).

| Parameter | Polyad | Order | $\Omega(K, nC)$        | $\{s\}$ $C_1$      | $\{s'\}$ $C_2$     | Value / $\text{cm}^{-1}$       |
|-----------|--------|-------|------------------------|--------------------|--------------------|--------------------------------|
| 81        | Pentad | 5     | 5(3, 0F <sub>2</sub> ) | 1000A <sub>1</sub> | 0010F <sub>2</sub> | 3.16(33) × 10 <sup>-8</sup>    |
| 82        | Pentad | 5     | 5(5, 0F <sub>2</sub> ) | 1000A <sub>1</sub> | 0010F <sub>2</sub> | -1.29(22) × 10 <sup>-8</sup>   |
| 83        | Pentad | 1     | 0(0, 0A <sub>1</sub> ) | 1000A <sub>1</sub> | 0200A <sub>1</sub> | -49.133(92)                    |
| 84        | Pentad | 3     | 2(0, 0A <sub>1</sub> ) | 1000A <sub>1</sub> | 0200A <sub>1</sub> | 3.88(32) × 10 <sup>-3</sup>    |
| 85        | Pentad | 5     | 4(0, 0A <sub>1</sub> ) | 1000A <sub>1</sub> | 0200A <sub>1</sub> | -4.80(28) × 10 <sup>-6</sup>   |
| 86        | Pentad | 5     | 4(4, 0A <sub>1</sub> ) | 1000A <sub>1</sub> | 0200A <sub>1</sub> | -6.47(36) × 10 <sup>-7</sup>   |
| 87        | Pentad | 3     | 2(2, 0E)               | 1000A <sub>1</sub> | 0200E              | 1.163(24) × 10 <sup>-2</sup>   |
| 88        | Pentad | 5     | 4(2, 0E)               | 1000A <sub>1</sub> | 0200E              | 2.529(72) × 10 <sup>-6</sup>   |
| 89        | Pentad | 5     | 4(4, 0E)               | 1000A <sub>1</sub> | 0200E              | 0.0                            |
| 90        | Pentad | 2     | 1(1, 0F <sub>1</sub> ) | 1000A <sub>1</sub> | 0101F <sub>1</sub> | 1.920(13)                      |
| 91        | Pentad | 4     | 3(1, 0F <sub>1</sub> ) | 1000A <sub>1</sub> | 0101F <sub>1</sub> | -4.666(93) × 10 <sup>-4</sup>  |
| 92        | Pentad | 4     | 3(3, 0F <sub>1</sub> ) | 1000A <sub>1</sub> | 0101F <sub>1</sub> | -2.568(73) × 10 <sup>-4</sup>  |
| 93        | Pentad | 5     | 4(4, 0F <sub>1</sub> ) | 1000A <sub>1</sub> | 0101F <sub>1</sub> | -4.643(87) × 10 <sup>-6</sup>  |
| 94        | Pentad | 3     | 2(2, 0F <sub>2</sub> ) | 1000A <sub>1</sub> | 0101F <sub>2</sub> | 1.253(28) × 10 <sup>-2</sup>   |
| 95        | Pentad | 4     | 3(3, 0F <sub>2</sub> ) | 1000A <sub>1</sub> | 0101F <sub>2</sub> | 4.370(71) × 10 <sup>-4</sup>   |
| 96        | Pentad | 5     | 4(2, 0F <sub>2</sub> ) | 1000A <sub>1</sub> | 0101F <sub>2</sub> | 1.035(17) × 10 <sup>-5</sup>   |
| 97        | Pentad | 5     | 4(4, 0F <sub>2</sub> ) | 1000A <sub>1</sub> | 0101F <sub>2</sub> | 1.484(97) × 10 <sup>-6</sup>   |
| 98        | Pentad | 1     | 0(0, 0A <sub>1</sub> ) | 1000A <sub>1</sub> | 0002A <sub>1</sub> | -30.68(37)                     |
| 99        | Pentad | 3     | 2(0, 0A <sub>1</sub> ) | 1000A <sub>1</sub> | 0002A <sub>1</sub> | -1.818(48) × 10 <sup>-2</sup>  |
| 100       | Pentad | 5     | 4(0, 0A <sub>1</sub> ) | 1000A <sub>1</sub> | 0002A <sub>1</sub> | 1.188(29) × 10 <sup>-5</sup>   |
| 101       | Pentad | 5     | 4(4, 0A <sub>1</sub> ) | 1000A <sub>1</sub> | 0002A <sub>1</sub> | 1.48(40) × 10 <sup>-7</sup>    |
| 102       | Pentad | 3     | 2(2, 0E)               | 1000A <sub>1</sub> | 0002E              | -4.94(32) × 10 <sup>-3</sup>   |
| 103       | Pentad | 5     | 4(2, 0E)               | 1000A <sub>1</sub> | 0002E              | 9.0(1.0) × 10 <sup>-7</sup>    |
| 104       | Pentad | 5     | 4(4, 0E)               | 1000A <sub>1</sub> | 0002E              | -1.91(11) × 10 <sup>-6</sup>   |
| 105       | Pentad | 3     | 2(2, 0F <sub>2</sub> ) | 1000A <sub>1</sub> | 0002F <sub>2</sub> | -3.803(35) × 10 <sup>-2</sup>  |
| 106       | Pentad | 4     | 3(3, 0F <sub>2</sub> ) | 1000A <sub>1</sub> | 0002F <sub>2</sub> | 8.81(87) × 10 <sup>-5</sup>    |
| 107       | Pentad | 5     | 4(2, 0F <sub>2</sub> ) | 1000A <sub>1</sub> | 0002F <sub>2</sub> | 0.0                            |
| 108       | Pentad | 5     | 4(4, 0F <sub>2</sub> ) | 1000A <sub>1</sub> | 0002F <sub>2</sub> | -1.92(11) × 10 <sup>-6</sup>   |
| 109       | Pentad | 0     | 0(0, 0A <sub>1</sub> ) | 0010F <sub>2</sub> | 0010F <sub>2</sub> | 3018.505(12)                   |
| 110       | Pentad | 1     | 1(1, 0F <sub>1</sub> ) | 0010F <sub>2</sub> | 0010F <sub>2</sub> | 1.24643(77)                    |
| 111       | Pentad | 2     | 2(0, 0A <sub>1</sub> ) | 0010F <sub>2</sub> | 0010F <sub>2</sub> | -3.7665(34) × 10 <sup>-2</sup> |
| 112       | Pentad | 2     | 2(2, 0E)               | 0010F <sub>2</sub> | 0010F <sub>2</sub> | 1.3246(45) × 10 <sup>-2</sup>  |
| 113       | Pentad | 2     | 2(2, 0F <sub>2</sub> ) | 0010F <sub>2</sub> | 0010F <sub>2</sub> | -6.620(40) × 10 <sup>-3</sup>  |
| 114       | Pentad | 3     | 3(1, 0F <sub>1</sub> ) | 0010F <sub>2</sub> | 0010F <sub>2</sub> | 1.866(20) × 10 <sup>-4</sup>   |
| 115       | Pentad | 3     | 3(3, 0F <sub>1</sub> ) | 0010F <sub>2</sub> | 0010F <sub>2</sub> | 3.69(14) × 10 <sup>-5</sup>    |
| 116       | Pentad | 4     | 4(0, 0A <sub>1</sub> ) | 0010F <sub>2</sub> | 0010F <sub>2</sub> | -1.351(50) × 10 <sup>-6</sup>  |
| 117       | Pentad | 4     | 4(2, 0E)               | 0010F <sub>2</sub> | 0010F <sub>2</sub> | -2.135(41) × 10 <sup>-6</sup>  |
| 118       | Pentad | 4     | 4(2, 0F <sub>2</sub> ) | 0010F <sub>2</sub> | 0010F <sub>2</sub> | 2.627(48) × 10 <sup>-6</sup>   |
| 119       | Pentad | 4     | 4(4, 0A <sub>1</sub> ) | 0010F <sub>2</sub> | 0010F <sub>2</sub> | 6.69(14) × 10 <sup>-7</sup>    |
| 120       | Pentad | 4     | 4(4, 0E)               | 0010F <sub>2</sub> | 0010F <sub>2</sub> | 4.431(62) × 10 <sup>-6</sup>   |
| 121       | Pentad | 4     | 4(4, 0F <sub>2</sub> ) | 0010F <sub>2</sub> | 0010F <sub>2</sub> | 5.214(77) × 10 <sup>-6</sup>   |
| 122       | Pentad | 5     | 5(1, 0F <sub>1</sub> ) | 0010F <sub>2</sub> | 0010F <sub>2</sub> | -3.33(13) × 10 <sup>-8</sup>   |
| 123       | Pentad | 5     | 5(3, 0F <sub>1</sub> ) | 0010F <sub>2</sub> | 0010F <sub>2</sub> | 1.397(85) × 10 <sup>-8</sup>   |
| 124       | Pentad | 5     | 5(5, 0F <sub>1</sub> ) | 0010F <sub>2</sub> | 0010F <sub>2</sub> | 2.110(76) × 10 <sup>-8</sup>   |
| 125       | Pentad | 5     | 5(5, 1F <sub>1</sub> ) | 0010F <sub>2</sub> | 0010F <sub>2</sub> | -5.05(16) × 10 <sup>-8</sup>   |
| 126       | Pentad | 3     | 2(2, 0F <sub>2</sub> ) | 0010F <sub>2</sub> | 0200A <sub>1</sub> | -1.472(19) × 10 <sup>-2</sup>  |
| 127       | Pentad | 4     | 3(3, 0F <sub>2</sub> ) | 0010F <sub>2</sub> | 0200A <sub>1</sub> | 1.163(36) × 10 <sup>-4</sup>   |
| 128       | Pentad | 5     | 4(2, 0F <sub>2</sub> ) | 0010F <sub>2</sub> | 0200A <sub>1</sub> | 0.0                            |
| 129       | Pentad | 5     | 4(4, 0F <sub>2</sub> ) | 0010F <sub>2</sub> | 0200A <sub>1</sub> | 7.37(12) × 10 <sup>-6</sup>    |
| 130       | Pentad | 2     | 1(1, 0F <sub>1</sub> ) | 0010F <sub>2</sub> | 0200E              | 1.5014(39)                     |
| 131       | Pentad | 3     | 2(2, 0F <sub>2</sub> ) | 0010F <sub>2</sub> | 0200E              | -2.299(16) × 10 <sup>-2</sup>  |
| 132       | Pentad | 4     | 3(1, 0F <sub>1</sub> ) | 0010F <sub>2</sub> | 0200E              | 1.0825(51) × 10 <sup>-3</sup>  |
| 133       | Pentad | 4     | 3(3, 0F <sub>1</sub> ) | 0010F <sub>2</sub> | 0200E              | 1.144(31) × 10 <sup>-4</sup>   |
| 134       | Pentad | 4     | 3(3, 0F <sub>2</sub> ) | 0010F <sub>2</sub> | 0200E              | -9.90(29) × 10 <sup>-5</sup>   |
| 135       | Pentad | 5     | 4(2, 0F <sub>2</sub> ) | 0010F <sub>2</sub> | 0200E              | -5.25(13) × 10 <sup>-6</sup>   |
| 136       | Pentad | 5     | 4(4, 0F <sub>1</sub> ) | 0010F <sub>2</sub> | 0200E              | 4.35(10) × 10 <sup>-6</sup>    |
| 137       | Pentad | 5     | 4(4, 0F <sub>2</sub> ) | 0010F <sub>2</sub> | 0200E              | 0.0                            |
| 138       | Pentad | 2     | 1(1, 0F <sub>1</sub> ) | 0010F <sub>2</sub> | 0101F <sub>1</sub> | 4.382(71) × 10 <sup>-1</sup>   |
| 139       | Pentad | 3     | 2(2, 0E)               | 0010F <sub>2</sub> | 0101F <sub>1</sub> | -3.80(14) × 10 <sup>-3</sup>   |
| 140       | Pentad | 3     | 2(2, 0F <sub>2</sub> ) | 0010F <sub>2</sub> | 0101F <sub>1</sub> | -2.210(24) × 10 <sup>-2</sup>  |
| 141       | Pentad | 4     | 3(1, 0F <sub>1</sub> ) | 0010F <sub>2</sub> | 0101F <sub>1</sub> | 1.686(59) × 10 <sup>-4</sup>   |
| 142       | Pentad | 4     | 3(3, 0A <sub>2</sub> ) | 0010F <sub>2</sub> | 0101F <sub>1</sub> | 1.343(32) × 10 <sup>-4</sup>   |
| 143       | Pentad | 4     | 3(3, 0F <sub>1</sub> ) | 0010F <sub>2</sub> | 0101F <sub>1</sub> | -7.84(55) × 10 <sup>-5</sup>   |
| 144       | Pentad | 4     | 3(3, 0F <sub>2</sub> ) | 0010F <sub>2</sub> | 0101F <sub>1</sub> | -2.65(63) × 10 <sup>-5</sup>   |
| 145       | Pentad | 5     | 4(2, 0E)               | 0010F <sub>2</sub> | 0101F <sub>1</sub> | 1.18(13) × 10 <sup>-6</sup>    |
| 146       | Pentad | 5     | 4(2, 0F <sub>2</sub> ) | 0010F <sub>2</sub> | 0101F <sub>1</sub> | -7.60(17) × 10 <sup>-6</sup>   |
| 147       | Pentad | 5     | 4(4, 0E)               | 0010F <sub>2</sub> | 0101F <sub>1</sub> | 0.0                            |
| 148       | Pentad | 5     | 4(4, 0F <sub>1</sub> ) | 0010F <sub>2</sub> | 0101F <sub>1</sub> | 0.0                            |
| 149       | Pentad | 5     | 4(4, 0F <sub>2</sub> ) | 0010F <sub>2</sub> | 0101F <sub>1</sub> | -1.549(15) × 10 <sup>-5</sup>  |
| 150       | Pentad | 1     | 0(0, 0A <sub>1</sub> ) | 0010F <sub>2</sub> | 0101F <sub>2</sub> | -1.861(68)                     |
| 151       | Pentad | 2     | 1(1, 0F <sub>1</sub> ) | 0010F <sub>2</sub> | 0101F <sub>2</sub> | -3.093(84) × 10 <sup>-1</sup>  |
| 152       | Pentad | 3     | 2(0, 0A <sub>1</sub> ) | 0010F <sub>2</sub> | 0101F <sub>2</sub> | -3.202(14) × 10 <sup>-2</sup>  |
| 153       | Pentad | 3     | 2(2, 0E)               | 0010F <sub>2</sub> | 0101F <sub>2</sub> | -2.93(13) × 10 <sup>-3</sup>   |
| 154       | Pentad | 3     | 2(2, 0F <sub>2</sub> ) | 0010F <sub>2</sub> | 0101F <sub>2</sub> | -2.196(20) × 10 <sup>-2</sup>  |
| 155       | Pentad | 4     | 3(1, 0F <sub>1</sub> ) | 0010F <sub>2</sub> | 0101F <sub>2</sub> | -6.18(61) × 10 <sup>-5</sup>   |
| 156       | Pentad | 4     | 3(3, 0F <sub>1</sub> ) | 0010F <sub>2</sub> | 0101F <sub>2</sub> | -1.119(57) × 10 <sup>-4</sup>  |
| 157       | Pentad | 4     | 3(3, 0F <sub>2</sub> ) | 0010F <sub>2</sub> | 0101F <sub>2</sub> | 2.286(67) × 10 <sup>-4</sup>   |
| 158       | Pentad | 5     | 4(0, 0A <sub>1</sub> ) | 0010F <sub>2</sub> | 0101F <sub>2</sub> | 8.30(17) × 10 <sup>-6</sup>    |
| 159       | Pentad | 5     | 4(2, 0E)               | 0010F <sub>2</sub> | 0101F <sub>2</sub> | 3.88(10) × 10 <sup>-6</sup>    |
| 160       | Pentad | 5     | 4(2, 0F <sub>2</sub> ) | 0010F <sub>2</sub> | 0101F <sub>2</sub> | -3.35(14) × 10 <sup>-6</sup>   |

Table I (continued).

| Parameter | Polyad | Order | $\Omega(K, nC)$        | $\{s\}$ $C_1$      | $\{s'\}$ $C_2$     | Value / $\text{cm}^{-1}$       |
|-----------|--------|-------|------------------------|--------------------|--------------------|--------------------------------|
| 161       | Pentad | 5     | 4(4, 0A <sub>1</sub> ) | 0010F <sub>2</sub> | 0101F <sub>2</sub> | -9.75(56) × 10 <sup>-7</sup>   |
| 162       | Pentad | 5     | 4(4, 0E)               | 0010F <sub>2</sub> | 0101F <sub>2</sub> | -4.509(87) × 10 <sup>-6</sup>  |
| 163       | Pentad | 5     | 4(4, 0F <sub>1</sub> ) | 0010F <sub>2</sub> | 0101F <sub>2</sub> | -9.67(11) × 10 <sup>-6</sup>   |
| 164       | Pentad | 5     | 4(4, 0F <sub>2</sub> ) | 0010F <sub>2</sub> | 0101F <sub>2</sub> | -6.58(13) × 10 <sup>-6</sup>   |
| 165       | Pentad | 3     | 2(2, 0F <sub>2</sub> ) | 0010F <sub>2</sub> | 0002A <sub>1</sub> | 3.396(35) × 10 <sup>-2</sup>   |
| 166       | Pentad | 4     | 3(3, 0F <sub>2</sub> ) | 0010F <sub>2</sub> | 0002A <sub>1</sub> | 1.69(11) × 10 <sup>-4</sup>    |
| 167       | Pentad | 5     | 4(2, 0F <sub>2</sub> ) | 0010F <sub>2</sub> | 0002A <sub>1</sub> | 8.97(26) × 10 <sup>-6</sup>    |
| 168       | Pentad | 5     | 4(4, 0F <sub>2</sub> ) | 0010F <sub>2</sub> | 0002A <sub>1</sub> | -7.97(17) × 10 <sup>-6</sup>   |
| 169       | Pentad | 2     | 1(1, 0F <sub>1</sub> ) | 0010F <sub>2</sub> | 0002E              | -1.630(83) × 10 <sup>-1</sup>  |
| 170       | Pentad | 3     | 2(2, 0F <sub>2</sub> ) | 0010F <sub>2</sub> | 0002E              | -1.122(36) × 10 <sup>-2</sup>  |
| 171       | Pentad | 4     | 3(1, 0F <sub>1</sub> ) | 0010F <sub>2</sub> | 0002E              | 3.338(89) × 10 <sup>-4</sup>   |
| 172       | Pentad | 4     | 3(3, 0F <sub>1</sub> ) | 0010F <sub>2</sub> | 0002E              | -5.76(71) × 10 <sup>-5</sup>   |
| 173       | Pentad | 4     | 3(3, 0F <sub>2</sub> ) | 0010F <sub>2</sub> | 0002E              | 0.0                            |
| 174       | Pentad | 5     | 4(2, 0F <sub>2</sub> ) | 0010F <sub>2</sub> | 0002E              | 6.2(2.1) × 10 <sup>-7</sup>    |
| 175       | Pentad | 5     | 4(4, 0F <sub>1</sub> ) | 0010F <sub>2</sub> | 0002E              | -7.84(20) × 10 <sup>-6</sup>   |
| 176       | Pentad | 5     | 4(4, 0F <sub>2</sub> ) | 0010F <sub>2</sub> | 0002E              | 4.73(18) × 10 <sup>-6</sup>    |
| 177       | Pentad | 1     | 0(0, 0A <sub>1</sub> ) | 0010F <sub>2</sub> | 0002F <sub>2</sub> | -19.88(13)                     |
| 178       | Pentad | 2     | 1(1, 0F <sub>1</sub> ) | 0010F <sub>2</sub> | 0002F <sub>2</sub> | 0.0                            |
| 179       | Pentad | 3     | 2(0, 0A <sub>1</sub> ) | 0010F <sub>2</sub> | 0002F <sub>2</sub> | 2.62(23) × 10 <sup>-3</sup>    |
| 180       | Pentad | 3     | 2(2, 0E)               | 0010F <sub>2</sub> | 0002F <sub>2</sub> | 1.450(24) × 10 <sup>-2</sup>   |
| 181       | Pentad | 3     | 2(2, 0F <sub>2</sub> ) | 0010F <sub>2</sub> | 0002F <sub>2</sub> | -9.63(32) × 10 <sup>-3</sup>   |
| 182       | Pentad | 4     | 3(1, 0F <sub>1</sub> ) | 0010F <sub>2</sub> | 0002F <sub>2</sub> | 8.13(88) × 10 <sup>-5</sup>    |
| 183       | Pentad | 4     | 3(3, 0F <sub>1</sub> ) | 0010F <sub>2</sub> | 0002F <sub>2</sub> | 1.848(83) × 10 <sup>-4</sup>   |
| 184       | Pentad | 4     | 3(3, 0F <sub>2</sub> ) | 0010F <sub>2</sub> | 0002F <sub>2</sub> | 3.034(88) × 10 <sup>-4</sup>   |
| 185       | Pentad | 5     | 4(0, 0A <sub>1</sub> ) | 0010F <sub>2</sub> | 0002F <sub>2</sub> | 0.0                            |
| 186       | Pentad | 5     | 4(2, 0E)               | 0010F <sub>2</sub> | 0002F <sub>2</sub> | 3.91(15) × 10 <sup>-6</sup>    |
| 187       | Pentad | 5     | 4(2, 0F <sub>2</sub> ) | 0010F <sub>2</sub> | 0002F <sub>2</sub> | -3.59(16) × 10 <sup>-6</sup>   |
| 188       | Pentad | 5     | 4(4, 0A <sub>1</sub> ) | 0010F <sub>2</sub> | 0002F <sub>2</sub> | 5.026(70) × 10 <sup>-6</sup>   |
| 189       | Pentad | 5     | 4(4, 0E)               | 0010F <sub>2</sub> | 0002F <sub>2</sub> | 8.16(11) × 10 <sup>-6</sup>    |
| 190       | Pentad | 5     | 4(4, 0F <sub>1</sub> ) | 0010F <sub>2</sub> | 0002F <sub>2</sub> | 0.0                            |
| 191       | Pentad | 5     | 4(4, 0F <sub>2</sub> ) | 0010F <sub>2</sub> | 0002F <sub>2</sub> | 0.0                            |
| 192       | Pentad | 2     | 0(0, 0A <sub>1</sub> ) | 0200A <sub>1</sub> | 0200A <sub>1</sub> | -21.519(77)                    |
| 193       | Pentad | 4     | 2(0, 0A <sub>1</sub> ) | 0200A <sub>1</sub> | 0200A <sub>1</sub> | 1.25(27) × 10 <sup>-3</sup>    |
| 194       | Pentad | 4     | 2(2, 0E)               | 0200A <sub>1</sub> | 0200E              | -2.05(17) × 10 <sup>-3</sup>   |
| 195       | Pentad | 2     | 0(0, 0A <sub>1</sub> ) | 0200E              | 0200E              | -1.5427(21)                    |
| 196       | Pentad | 4     | 2(0, 0A <sub>1</sub> ) | 0200E              | 0200E              | -8.16(23) × 10 <sup>-3</sup>   |
| 197       | Pentad | 4     | 2(2, 0E)               | 0200E              | 0200E              | 1.51(20) × 10 <sup>-3</sup>    |
| 198       | Pentad | 5     | 3(3, 0A <sub>2</sub> ) | 0200E              | 0200E              | -2.832(32) × 10 <sup>-4</sup>  |
| 199       | Pentad | 3     | 1(1, 0F <sub>1</sub> ) | 0200A <sub>1</sub> | 0101F <sub>1</sub> | -8.29(88) × 10 <sup>-2</sup>   |
| 200       | Pentad | 5     | 3(1, 0F <sub>1</sub> ) | 0200A <sub>1</sub> | 0101F <sub>1</sub> | 3.55(41) × 10 <sup>-5</sup>    |
| 201       | Pentad | 5     | 3(3, 0F <sub>1</sub> ) | 0200A <sub>1</sub> | 0101F <sub>1</sub> | -6.06(45) × 10 <sup>-5</sup>   |
| 202       | Pentad | 4     | 2(2, 0F <sub>2</sub> ) | 0200A <sub>1</sub> | 0101F <sub>2</sub> | -6.34(16) × 10 <sup>-3</sup>   |
| 203       | Pentad | 5     | 3(3, 0F <sub>2</sub> ) | 0200A <sub>1</sub> | 0101F <sub>2</sub> | -7.49(53) × 10 <sup>-5</sup>   |
| 204       | Pentad | 3     | 1(1, 0F <sub>1</sub> ) | 0200E              | 0101F <sub>1</sub> | 1.227(97) × 10 <sup>-1</sup>   |
| 205       | Pentad | 4     | 2(2, 0F <sub>2</sub> ) | 0200E              | 0101F <sub>1</sub> | -3.56(14) × 10 <sup>-3</sup>   |
| 206       | Pentad | 5     | 3(1, 0F <sub>1</sub> ) | 0200E              | 0101F <sub>1</sub> | 1.321(42) × 10 <sup>-4</sup>   |
| 207       | Pentad | 5     | 3(3, 0F <sub>1</sub> ) | 0200E              | 0101F <sub>1</sub> | 1.288(35) × 10 <sup>-4</sup>   |
| 208       | Pentad | 5     | 3(3, 0F <sub>2</sub> ) | 0200E              | 0101F <sub>1</sub> | -1.559(38) × 10 <sup>-4</sup>  |
| 209       | Pentad | 3     | 1(1, 0F <sub>1</sub> ) | 0200E              | 0101F <sub>2</sub> | -2.596(75) × 10 <sup>-1</sup>  |
| 210       | Pentad | 4     | 2(2, 0F <sub>2</sub> ) | 0200E              | 0101F <sub>2</sub> | 6.57(21) × 10 <sup>-3</sup>    |
| 211       | Pentad | 5     | 3(1, 0F <sub>1</sub> ) | 0200E              | 0101F <sub>2</sub> | -4.93(30) × 10 <sup>-5</sup>   |
| 212       | Pentad | 5     | 3(3, 0F <sub>1</sub> ) | 0200E              | 0101F <sub>2</sub> | -7.00(26) × 10 <sup>-5</sup>   |
| 213       | Pentad | 5     | 3(3, 0F <sub>2</sub> ) | 0200E              | 0101F <sub>2</sub> | -2.55(24) × 10 <sup>-5</sup>   |
| 214       | Pentad | 2     | 0(0, 0A <sub>1</sub> ) | 0200A <sub>1</sub> | 0002A <sub>1</sub> | -3.27(33)                      |
| 215       | Pentad | 4     | 2(0, 0A <sub>1</sub> ) | 0200A <sub>1</sub> | 0002A <sub>1</sub> | 0.0                            |
| 216       | Pentad | 4     | 2(2, 0E)               | 0200A <sub>1</sub> | 0002E              | -9.31(33) × 10 <sup>-3</sup>   |
| 217       | Pentad | 4     | 2(2, 0F <sub>2</sub> ) | 0200A <sub>1</sub> | 0002F <sub>2</sub> | 1.129(38) × 10 <sup>-2</sup>   |
| 218       | Pentad | 5     | 3(3, 0F <sub>2</sub> ) | 0200A <sub>1</sub> | 0002F <sub>2</sub> | 8.67(56) × 10 <sup>-5</sup>    |
| 219       | Pentad | 4     | 2(2, 0E)               | 0200E              | 0002A <sub>1</sub> | -2.51(38) × 10 <sup>-3</sup>   |
| 220       | Pentad | 2     | 0(0, 0A <sub>1</sub> ) | 0200E              | 0002E              | 2.80(17)                       |
| 221       | Pentad | 4     | 2(0, 0A <sub>1</sub> ) | 0200E              | 0002E              | -7.95(28) × 10 <sup>-3</sup>   |
| 222       | Pentad | 4     | 2(2, 0E)               | 0200E              | 0002E              | 9.14(31) × 10 <sup>-3</sup>    |
| 223       | Pentad | 5     | 3(3, 0A <sub>2</sub> ) | 0200E              | 0002E              | -1.472(25) × 10 <sup>-4</sup>  |
| 224       | Pentad | 3     | 1(1, 0F <sub>1</sub> ) | 0200E              | 0002F <sub>2</sub> | 9.7(1.4) × 10 <sup>-2</sup>    |
| 225       | Pentad | 4     | 2(2, 0F <sub>2</sub> ) | 0200E              | 0002F <sub>2</sub> | 6.78(35) × 10 <sup>-3</sup>    |
| 226       | Pentad | 5     | 3(1, 0F <sub>1</sub> ) | 0200E              | 0002F <sub>2</sub> | 1.98(51) × 10 <sup>-5</sup>    |
| 227       | Pentad | 5     | 3(3, 0F <sub>1</sub> ) | 0200E              | 0002F <sub>2</sub> | -4.01(47) × 10 <sup>-5</sup>   |
| 228       | Pentad | 5     | 3(3, 0F <sub>2</sub> ) | 0200E              | 0002F <sub>2</sub> | -6.30(35) × 10 <sup>-5</sup>   |
| 229       | Pentad | 2     | 0(0, 0A <sub>1</sub> ) | 0101F <sub>1</sub> | 0101F <sub>1</sub> | 1.980486(98)                   |
| 230       | Pentad | 3     | 1(1, 0F <sub>1</sub> ) | 0101F <sub>1</sub> | 0101F <sub>1</sub> | -1.1187(56) × 10 <sup>-1</sup> |
| 231       | Pentad | 4     | 2(0, 0A <sub>1</sub> ) | 0101F <sub>1</sub> | 0101F <sub>1</sub> | 9.67(21) × 10 <sup>-3</sup>    |
| 232       | Pentad | 4     | 2(2, 0E)               | 0101F <sub>1</sub> | 0101F <sub>1</sub> | -8.09(31) × 10 <sup>-3</sup>   |
| 233       | Pentad | 4     | 2(2, 0F <sub>2</sub> ) | 0101F <sub>1</sub> | 0101F <sub>1</sub> | 5.86(36) × 10 <sup>-3</sup>    |
| 234       | Pentad | 5     | 3(1, 0F <sub>1</sub> ) | 0101F <sub>1</sub> | 0101F <sub>1</sub> | 1.275(50) × 10 <sup>-4</sup>   |
| 235       | Pentad | 5     | 3(3, 0F <sub>1</sub> ) | 0101F <sub>1</sub> | 0101F <sub>1</sub> | 2.765(56) × 10 <sup>-4</sup>   |
| 236       | Pentad | 3     | 1(1, 0F <sub>1</sub> ) | 0101F <sub>1</sub> | 0101F <sub>2</sub> | -2.951(25) × 10 <sup>-1</sup>  |
| 237       | Pentad | 4     | 2(2, 0E)               | 0101F <sub>1</sub> | 0101F <sub>2</sub> | -5.660(74) × 10 <sup>-3</sup>  |
| 238       | Pentad | 4     | 2(2, 0F <sub>2</sub> ) | 0101F <sub>1</sub> | 0101F <sub>2</sub> | -1.858(18) × 10 <sup>-2</sup>  |
| 239       | Pentad | 5     | 3(1, 0F <sub>1</sub> ) | 0101F <sub>1</sub> | 0101F <sub>2</sub> | 9.0(3.1) × 10 <sup>-6</sup>    |
| 240       | Pentad | 5     | 3(3, 0A <sub>2</sub> ) | 0101F <sub>1</sub> | 0101F <sub>2</sub> | -1.656(18) × 10 <sup>-4</sup>  |

Table I (continued).

| Parameter | Polyad | Order | $\Omega(K, nC)$        | $\{s\}$ $C_1$      | $\{s'\}$ $C_2$     | Value / $\text{cm}^{-1}$      |
|-----------|--------|-------|------------------------|--------------------|--------------------|-------------------------------|
| 241       | Pentad | 5     | 3(3, 0F <sub>1</sub> ) | 0101F <sub>1</sub> | 0101F <sub>2</sub> | -3.52(32) × 10 <sup>-5</sup>  |
| 242       | Pentad | 5     | 3(3, 0F <sub>2</sub> ) | 0101F <sub>1</sub> | 0101F <sub>2</sub> | -1.137(34) × 10 <sup>-4</sup> |
| 243       | Pentad | 2     | 0(0, 0A <sub>1</sub> ) | 0101F <sub>2</sub> | 0101F <sub>2</sub> | -14.2178(71)                  |
| 244       | Pentad | 3     | 1(1, 0F <sub>1</sub> ) | 0101F <sub>2</sub> | 0101F <sub>2</sub> | -4.306(90) × 10 <sup>-1</sup> |
| 245       | Pentad | 4     | 2(0, 0A <sub>1</sub> ) | 0101F <sub>2</sub> | 0101F <sub>2</sub> | 3.41(14) × 10 <sup>-3</sup>   |
| 246       | Pentad | 4     | 2(2, 0E )              | 0101F <sub>2</sub> | 0101F <sub>2</sub> | -6.67(14) × 10 <sup>-3</sup>  |
| 247       | Pentad | 4     | 2(2, 0F <sub>2</sub> ) | 0101F <sub>2</sub> | 0101F <sub>2</sub> | 9.69(10) × 10 <sup>-3</sup>   |
| 248       | Pentad | 5     | 3(1, 0F <sub>1</sub> ) | 0101F <sub>2</sub> | 0101F <sub>2</sub> | 9.29(45) × 10 <sup>-5</sup>   |
| 249       | Pentad | 5     | 3(3, 0F <sub>1</sub> ) | 0101F <sub>2</sub> | 0101F <sub>2</sub> | 3.102(52) × 10 <sup>-4</sup>  |
| 250       | Pentad | 3     | 1(1, 0F <sub>1</sub> ) | 0101F <sub>1</sub> | 0002A <sub>1</sub> | 8.28(11) × 10 <sup>-1</sup>   |
| 251       | Pentad | 5     | 3(1, 0F <sub>1</sub> ) | 0101F <sub>1</sub> | 0002A <sub>1</sub> | 5.85(42) × 10 <sup>-5</sup>   |
| 252       | Pentad | 5     | 3(3, 0F <sub>1</sub> ) | 0101F <sub>1</sub> | 0002A <sub>1</sub> | 6.27(46) × 10 <sup>-5</sup>   |
| 253       | Pentad | 3     | 1(1, 0F <sub>1</sub> ) | 0101F <sub>1</sub> | 0002E              | 2.001(68) × 10 <sup>-1</sup>  |
| 254       | Pentad | 4     | 2(2, 0F <sub>2</sub> ) | 0101F <sub>1</sub> | 0002E              | -4.28(17) × 10 <sup>-3</sup>  |
| 255       | Pentad | 5     | 3(1, 0F <sub>1</sub> ) | 0101F <sub>1</sub> | 0002E              | -7.86(39) × 10 <sup>-5</sup>  |
| 256       | Pentad | 5     | 3(3, 0F <sub>1</sub> ) | 0101F <sub>1</sub> | 0002E              | 9.51(38) × 10 <sup>-5</sup>   |
| 257       | Pentad | 5     | 3(3, 0F <sub>2</sub> ) | 0101F <sub>1</sub> | 0002E              | -1.061(41) × 10 <sup>-4</sup> |
| 258       | Pentad | 3     | 1(1, 0F <sub>1</sub> ) | 0101F <sub>1</sub> | 0002F <sub>2</sub> | -3.587(72) × 10 <sup>-1</sup> |
| 259       | Pentad | 4     | 2(2, 0E )              | 0101F <sub>1</sub> | 0002F <sub>2</sub> | 7.21(15) × 10 <sup>-3</sup>   |
| 260       | Pentad | 4     | 2(2, 0F <sub>2</sub> ) | 0101F <sub>1</sub> | 0002F <sub>2</sub> | -9.4(1.7) × 10 <sup>-4</sup>  |
| 261       | Pentad | 5     | 3(1, 0F <sub>1</sub> ) | 0101F <sub>1</sub> | 0002F <sub>2</sub> | 9.36(44) × 10 <sup>-5</sup>   |
| 262       | Pentad | 5     | 3(3, 0A <sub>2</sub> ) | 0101F <sub>1</sub> | 0002F <sub>2</sub> | 3.44(27) × 10 <sup>-5</sup>   |
| 263       | Pentad | 5     | 3(3, 0F <sub>1</sub> ) | 0101F <sub>1</sub> | 0002F <sub>2</sub> | 4.36(39) × 10 <sup>-5</sup>   |
| 264       | Pentad | 5     | 3(3, 0F <sub>2</sub> ) | 0101F <sub>1</sub> | 0002F <sub>2</sub> | 5.72(46) × 10 <sup>-5</sup>   |
| 265       | Pentad | 4     | 2(2, 0F <sub>2</sub> ) | 0101F <sub>2</sub> | 0002A <sub>1</sub> | 0.0                           |
| 266       | Pentad | 5     | 3(3, 0F <sub>2</sub> ) | 0101F <sub>2</sub> | 0002A <sub>1</sub> | -3.55(46) × 10 <sup>-5</sup>  |
| 267       | Pentad | 3     | 1(1, 0F <sub>1</sub> ) | 0101F <sub>2</sub> | 0002E              | 2.068(70) × 10 <sup>-1</sup>  |
| 268       | Pentad | 4     | 2(2, 0F <sub>2</sub> ) | 0101F <sub>2</sub> | 0002E              | -4.40(14) × 10 <sup>-3</sup>  |
| 269       | Pentad | 5     | 3(1, 0F <sub>1</sub> ) | 0101F <sub>2</sub> | 0002E              | 0.0                           |
| 270       | Pentad | 5     | 3(3, 0F <sub>1</sub> ) | 0101F <sub>2</sub> | 0002E              | 8.31(43) × 10 <sup>-5</sup>   |
| 271       | Pentad | 5     | 3(3, 0F <sub>2</sub> ) | 0101F <sub>2</sub> | 0002E              | 0.0                           |
| 272       | Pentad | 2     | 0(0, 0A <sub>1</sub> ) | 0101F <sub>2</sub> | 0002F <sub>2</sub> | -9.766(77)                    |
| 273       | Pentad | 3     | 1(1, 0F <sub>1</sub> ) | 0101F <sub>2</sub> | 0002F <sub>2</sub> | -5.69(25) × 10 <sup>-2</sup>  |
| 274       | Pentad | 4     | 2(0, 0A <sub>1</sub> ) | 0101F <sub>2</sub> | 0002F <sub>2</sub> | 0.0                           |
| 275       | Pentad | 4     | 2(2, 0E )              | 0101F <sub>2</sub> | 0002F <sub>2</sub> | 6.50(15) × 10 <sup>-3</sup>   |
| 276       | Pentad | 4     | 2(2, 0F <sub>2</sub> ) | 0101F <sub>2</sub> | 0002F <sub>2</sub> | -1.67(16) × 10 <sup>-3</sup>  |
| 277       | Pentad | 5     | 3(1, 0F <sub>1</sub> ) | 0101F <sub>2</sub> | 0002F <sub>2</sub> | 0.0                           |
| 278       | Pentad | 5     | 3(3, 0F <sub>1</sub> ) | 0101F <sub>2</sub> | 0002F <sub>2</sub> | -3.49(30) × 10 <sup>-5</sup>  |
| 279       | Pentad | 5     | 3(3, 0F <sub>2</sub> ) | 0101F <sub>2</sub> | 0002F <sub>2</sub> | 4.96(42) × 10 <sup>-5</sup>   |
| 280       | Pentad | 2     | 0(0, 0A <sub>1</sub> ) | 0002A <sub>1</sub> | 0002A <sub>1</sub> | -31.622(69)                   |
| 281       | Pentad | 4     | 2(0, 0A <sub>1</sub> ) | 0002A <sub>1</sub> | 0002A <sub>1</sub> | -3.35(23) × 10 <sup>-3</sup>  |
| 282       | Pentad | 4     | 2(2, 0E )              | 0002A <sub>1</sub> | 0002E              | 7.53(10) × 10 <sup>-3</sup>   |
| 283       | Pentad | 4     | 2(2, 0F <sub>2</sub> ) | 0002A <sub>1</sub> | 0002F <sub>2</sub> | -1.80(11) × 10 <sup>-3</sup>  |
| 284       | Pentad | 5     | 3(3, 0F <sub>2</sub> ) | 0002A <sub>1</sub> | 0002F <sub>2</sub> | 1.20(38) × 10 <sup>-5</sup>   |
| 285       | Pentad | 2     | 0(0, 0A <sub>1</sub> ) | 0002E              | 0002E              | 3.1125(21)                    |
| 286       | Pentad | 4     | 2(0, 0A <sub>1</sub> ) | 0002E              | 0002E              | -4.18(14) × 10 <sup>-3</sup>  |
| 287       | Pentad | 4     | 2(2, 0E )              | 0002E              | 0002E              | 7.38(12) × 10 <sup>-3</sup>   |
| 288       | Pentad | 5     | 3(3, 0A <sub>2</sub> ) | 0002E              | 0002E              | -6.15(28) × 10 <sup>-5</sup>  |
| 289       | Pentad | 3     | 1(1, 0F <sub>1</sub> ) | 0002E              | 0002F <sub>2</sub> | 8.958(54) × 10 <sup>-2</sup>  |
| 290       | Pentad | 4     | 2(2, 0F <sub>2</sub> ) | 0002E              | 0002F <sub>2</sub> | 1.0774(82) × 10 <sup>-2</sup> |
| 291       | Pentad | 5     | 3(1, 0F <sub>1</sub> ) | 0002E              | 0002F <sub>2</sub> | 6.57(22) × 10 <sup>-5</sup>   |
| 292       | Pentad | 5     | 3(3, 0F <sub>1</sub> ) | 0002E              | 0002F <sub>2</sub> | 7.97(20) × 10 <sup>-5</sup>   |
| 293       | Pentad | 5     | 3(3, 0F <sub>2</sub> ) | 0002E              | 0002F <sub>2</sub> | -6.14(25) × 10 <sup>-5</sup>  |
| 294       | Pentad | 2     | 0(0, 0A <sub>1</sub> ) | 0002F <sub>2</sub> | 0002F <sub>2</sub> | -5.833(13)                    |
| 295       | Pentad | 3     | 1(1, 0F <sub>1</sub> ) | 0002F <sub>2</sub> | 0002F <sub>2</sub> | -1.722(88) × 10 <sup>-1</sup> |
| 296       | Pentad | 4     | 2(0, 0A <sub>1</sub> ) | 0002F <sub>2</sub> | 0002F <sub>2</sub> | -3.71(10) × 10 <sup>-3</sup>  |
| 297       | Pentad | 4     | 2(2, 0E )              | 0002F <sub>2</sub> | 0002F <sub>2</sub> | 0.0                           |
| 298       | Pentad | 4     | 2(2, 0F <sub>2</sub> ) | 0002F <sub>2</sub> | 0002F <sub>2</sub> | 0.0                           |
| 299       | Pentad | 5     | 3(1, 0F <sub>1</sub> ) | 0002F <sub>2</sub> | 0002F <sub>2</sub> | -9.1(4.7) × 10 <sup>-6</sup>  |
| 300       | Pentad | 5     | 3(3, 0F <sub>1</sub> ) | 0002F <sub>2</sub> | 0002F <sub>2</sub> | 2.30(40) × 10 <sup>-5</sup>   |
| 301       | Octad  | 2     | 0(0, 0A <sub>1</sub> ) | 1100E              | 1100E              | 0.0                           |
| 302       | Octad  | 4     | 2(0, 0A <sub>1</sub> ) | 1100E              | 1100E              | -9.13(67) × 10 <sup>-3</sup>  |
| 303       | Octad  | 4     | 2(2, 0E )              | 1100E              | 1100E              | -5.22(65) × 10 <sup>-3</sup>  |
| 304       | Octad  | 5     | 3(3, 0A <sub>2</sub> ) | 1100E              | 1100E              | 6.28(11) × 10 <sup>-4</sup>   |
| 305       | Octad  | 3     | 1(1, 0F <sub>1</sub> ) | 1100E              | 1001F <sub>2</sub> | -5.82(31) × 10 <sup>-1</sup>  |
| 306       | Octad  | 4     | 2(2, 0F <sub>2</sub> ) | 1100E              | 1001F <sub>2</sub> | -2.985(97) × 10 <sup>-2</sup> |
| 307       | Octad  | 5     | 3(1, 0F <sub>1</sub> ) | 1100E              | 1001F <sub>2</sub> | -7.45(11) × 10 <sup>-4</sup>  |
| 308       | Octad  | 5     | 3(3, 0F <sub>1</sub> ) | 1100E              | 1001F <sub>2</sub> | -5.89(11) × 10 <sup>-4</sup>  |
| 309       | Octad  | 5     | 3(3, 0F <sub>2</sub> ) | 1100E              | 1001F <sub>2</sub> | -5.650(92) × 10 <sup>-4</sup> |
| 310       | Octad  | 3     | 1(1, 0F <sub>1</sub> ) | 1100E              | 0110F <sub>1</sub> | -1.171(11)                    |
| 311       | Octad  | 4     | 2(2, 0F <sub>2</sub> ) | 1100E              | 0110F <sub>1</sub> | -9.25(50) × 10 <sup>-3</sup>  |
| 312       | Octad  | 5     | 3(1, 0F <sub>1</sub> ) | 1100E              | 0110F <sub>1</sub> | -3.19(18) × 10 <sup>-4</sup>  |
| 313       | Octad  | 5     | 3(3, 0F <sub>1</sub> ) | 1100E              | 0110F <sub>1</sub> | -8.83(18) × 10 <sup>-4</sup>  |
| 314       | Octad  | 5     | 3(3, 0F <sub>2</sub> ) | 1100E              | 0110F <sub>1</sub> | 7.53(18) × 10 <sup>-4</sup>   |
| 315       | Octad  | 3     | 1(1, 0F <sub>1</sub> ) | 1100E              | 0110F <sub>2</sub> | -3.92(13) × 10 <sup>-1</sup>  |
| 316       | Octad  | 4     | 2(2, 0F <sub>2</sub> ) | 1100E              | 0110F <sub>2</sub> | 0.0                           |
| 317       | Octad  | 5     | 3(1, 0F <sub>1</sub> ) | 1100E              | 0110F <sub>2</sub> | 7.64(16) × 10 <sup>-4</sup>   |
| 318       | Octad  | 5     | 3(3, 0F <sub>1</sub> ) | 1100E              | 0110F <sub>2</sub> | 7.82(18) × 10 <sup>-4</sup>   |
| 319       | Octad  | 5     | 3(3, 0F <sub>2</sub> ) | 1100E              | 0110F <sub>2</sub> | -8.99(21) × 10 <sup>-4</sup>  |
| 320       | Octad  | 4     | 2(2, 0E )              | 1100E              | 0011A <sub>1</sub> | 7.33(54) × 10 <sup>-3</sup>   |

Table I (continued).

| Parameter | Polyad | Order | $\Omega(K, nC)$        | $\{s\}$ $C_1$      | $\{s'\}$ $C_2$     | Value / $\text{cm}^{-1}$    |
|-----------|--------|-------|------------------------|--------------------|--------------------|-----------------------------|
| 321       | Octad  | 2     | 0(0, 0A <sub>1</sub> ) | 1100E              | 0011E              | -14.78(12)                  |
| 322       | Octad  | 4     | 2(0, 0A <sub>1</sub> ) | 1100E              | 0011E              | 0.0                         |
| 323       | Octad  | 4     | 2(2, 0E )              | 1100E              | 0011E              | -8.2(6.1) $\times 10^{-4}$  |
| 324       | Octad  | 5     | 3(3, 0A <sub>2</sub> ) | 1100E              | 0011E              | 1.300(79) $\times 10^{-4}$  |
| 325       | Octad  | 3     | 1(1, 0F <sub>1</sub> ) | 1100E              | 0011F <sub>1</sub> | 0.0                         |
| 326       | Octad  | 4     | 2(2, 0F <sub>2</sub> ) | 1100E              | 0011F <sub>1</sub> | -4.088(65) $\times 10^{-2}$ |
| 327       | Octad  | 5     | 3(1, 0F <sub>1</sub> ) | 1100E              | 0011F <sub>1</sub> | 2.09(21) $\times 10^{-4}$   |
| 328       | Octad  | 5     | 3(3, 0F <sub>1</sub> ) | 1100E              | 0011F <sub>1</sub> | 0.0                         |
| 329       | Octad  | 5     | 3(3, 0F <sub>2</sub> ) | 1100E              | 0011F <sub>1</sub> | -7.48(19) $\times 10^{-4}$  |
| 330       | Octad  | 3     | 1(1, 0F <sub>1</sub> ) | 1100E              | 0011F <sub>2</sub> | 2.080(27)                   |
| 331       | Octad  | 4     | 2(2, 0F <sub>2</sub> ) | 1100E              | 0011F <sub>2</sub> | -7.838(68) $\times 10^{-2}$ |
| 332       | Octad  | 5     | 3(1, 0F <sub>1</sub> ) | 1100E              | 0011F <sub>2</sub> | 4.39(13) $\times 10^{-4}$   |
| 333       | Octad  | 5     | 3(3, 0F <sub>1</sub> ) | 1100E              | 0011F <sub>2</sub> | -2.05(12) $\times 10^{-4}$  |
| 334       | Octad  | 5     | 3(3, 0F <sub>2</sub> ) | 1100E              | 0011F <sub>2</sub> | -2.7(1.8) $\times 10^{-5}$  |
| 335       | Octad  | 3     | 0(0, 0A <sub>1</sub> ) | 1100E              | 0300E              | 3.265(44)                   |
| 336       | Octad  | 5     | 2(0, 0A <sub>1</sub> ) | 1100E              | 0300E              | -7.4(2.4) $\times 10^{-4}$  |
| 337       | Octad  | 5     | 2(2, 0E )              | 1100E              | 0300E              | -8.29(23) $\times 10^{-3}$  |
| 338       | Octad  | 5     | 2(2, 0E )              | 1100E              | 0300A <sub>1</sub> | -4.10(18) $\times 10^{-3}$  |
| 339       | Octad  | 5     | 2(2, 0E )              | 1100E              | 0300A <sub>2</sub> | -7.58(22) $\times 10^{-3}$  |
| 340       | Octad  | 4     | 1(1, 0F <sub>1</sub> ) | 1100E              | 0201F <sub>2</sub> | -3.06(14) $\times 10^{-1}$  |
| 341       | Octad  | 5     | 2(2, 0F <sub>2</sub> ) | 1100E              | 0201F <sub>2</sub> | 0.0                         |
| 342       | Octad  | 4     | 1(1, 0F <sub>1</sub> ) | 1100E              | 0201F <sub>1</sub> | 4.50(10) $\times 10^{-1}$   |
| 343       | Octad  | 5     | 2(2, 0F <sub>2</sub> ) | 1100E              | 0201F <sub>1</sub> | 2.463(32) $\times 10^{-2}$  |
| 344       | Octad  | 4     | 1(1, 0F <sub>1</sub> ) | 1100E              | 0201F <sub>2</sub> | -2.06(13) $\times 10^{-1}$  |
| 345       | Octad  | 5     | 2(2, 0F <sub>2</sub> ) | 1100E              | 0201F <sub>2</sub> | 5.72(33) $\times 10^{-3}$   |
| 346       | Octad  | 3     | 0(0, 0A <sub>1</sub> ) | 1100E              | 0102E              | -4.02(27)                   |
| 347       | Octad  | 5     | 2(0, 0A <sub>1</sub> ) | 1100E              | 0102E              | 1.329(49) $\times 10^{-2}$  |
| 348       | Octad  | 5     | 2(2, 0E )              | 1100E              | 0102E              | 5.77(44) $\times 10^{-3}$   |
| 349       | Octad  | 5     | 2(2, 0E )              | 1100E              | 0102A <sub>1</sub> | 0.0                         |
| 350       | Octad  | 5     | 2(2, 0E )              | 1100E              | 0102A <sub>2</sub> | -1.281(41) $\times 10^{-2}$ |
| 351       | Octad  | 3     | 0(0, 0A <sub>1</sub> ) | 1100E              | 0102E              | -1.95(21)                   |
| 352       | Octad  | 5     | 2(0, 0A <sub>1</sub> ) | 1100E              | 0102E              | -8.38(45) $\times 10^{-3}$  |
| 353       | Octad  | 5     | 2(2, 0E )              | 1100E              | 0102E              | 8.89(36) $\times 10^{-3}$   |
| 354       | Octad  | 4     | 1(1, 0F <sub>1</sub> ) | 1100E              | 0102F <sub>1</sub> | -3.21(18) $\times 10^{-1}$  |
| 355       | Octad  | 5     | 2(2, 0F <sub>2</sub> ) | 1100E              | 0102F <sub>1</sub> | -2.7(3.9) $\times 10^{-4}$  |
| 356       | Octad  | 4     | 1(1, 0F <sub>1</sub> ) | 1100E              | 0102F <sub>2</sub> | -1.10(21) $\times 10^{-1}$  |
| 357       | Octad  | 5     | 2(2, 0F <sub>2</sub> ) | 1100E              | 0102F <sub>2</sub> | 1.184(52) $\times 10^{-2}$  |
| 358       | Octad  | 4     | 1(1, 0F <sub>1</sub> ) | 1100E              | 0003F <sub>2</sub> | 8.25(53) $\times 10^{-1}$   |
| 359       | Octad  | 5     | 2(2, 0F <sub>2</sub> ) | 1100E              | 0003F <sub>2</sub> | 2.270(81) $\times 10^{-2}$  |
| 360       | Octad  | 5     | 2(2, 0E )              | 1100E              | 0003A <sub>1</sub> | 1.512(71) $\times 10^{-2}$  |
| 361       | Octad  | 4     | 1(1, 0F <sub>1</sub> ) | 1100E              | 0003F <sub>1</sub> | 5.87(28) $\times 10^{-1}$   |
| 362       | Octad  | 5     | 2(2, 0F <sub>2</sub> ) | 1100E              | 0003F <sub>1</sub> | 1.782(74) $\times 10^{-2}$  |
| 363       | Octad  | 4     | 1(1, 0F <sub>1</sub> ) | 1100E              | 0003F <sub>2</sub> | 2.10(35) $\times 10^{-1}$   |
| 364       | Octad  | 5     | 2(2, 0F <sub>2</sub> ) | 1100E              | 0003F <sub>2</sub> | 1.673(63) $\times 10^{-2}$  |
| 365       | Octad  | 2     | 0(0, 0A <sub>1</sub> ) | 1001F <sub>2</sub> | 1001F <sub>2</sub> | -6.352(52)                  |
| 366       | Octad  | 3     | 1(1, 0F <sub>1</sub> ) | 1001F <sub>2</sub> | 1001F <sub>2</sub> | 1.060(86) $\times 10^{-1}$  |
| 367       | Octad  | 4     | 2(0, 0A <sub>1</sub> ) | 1001F <sub>2</sub> | 1001F <sub>2</sub> | 9.38(45) $\times 10^{-3}$   |
| 368       | Octad  | 4     | 2(2, 0E )              | 1001F <sub>2</sub> | 1001F <sub>2</sub> | -1.306(70) $\times 10^{-2}$ |
| 369       | Octad  | 4     | 2(2, 0F <sub>2</sub> ) | 1001F <sub>2</sub> | 1001F <sub>2</sub> | 6.82(53) $\times 10^{-3}$   |
| 370       | Octad  | 5     | 3(1, 0F <sub>1</sub> ) | 1001F <sub>2</sub> | 1001F <sub>2</sub> | -2.64(16) $\times 10^{-4}$  |
| 371       | Octad  | 5     | 3(3, 0F <sub>1</sub> ) | 1001F <sub>2</sub> | 1001F <sub>2</sub> | -5.00(14) $\times 10^{-4}$  |
| 372       | Octad  | 3     | 1(1, 0F <sub>1</sub> ) | 1001F <sub>2</sub> | 0110F <sub>1</sub> | -8.6(3.0) $\times 10^{-2}$  |
| 373       | Octad  | 4     | 2(2, 0E )              | 1001F <sub>2</sub> | 0110F <sub>1</sub> | 0.0                         |
| 374       | Octad  | 4     | 2(2, 0F <sub>2</sub> ) | 1001F <sub>2</sub> | 0110F <sub>1</sub> | -1.51(10) $\times 10^{-2}$  |
| 375       | Octad  | 5     | 3(1, 0F <sub>1</sub> ) | 1001F <sub>2</sub> | 0110F <sub>1</sub> | 0.0                         |
| 376       | Octad  | 5     | 3(3, 0A <sub>2</sub> ) | 1001F <sub>2</sub> | 0110F <sub>1</sub> | 4.17(15) $\times 10^{-4}$   |
| 377       | Octad  | 5     | 3(3, 0F <sub>1</sub> ) | 1001F <sub>2</sub> | 0110F <sub>1</sub> | 7.27(23) $\times 10^{-4}$   |
| 378       | Octad  | 5     | 3(3, 0F <sub>2</sub> ) | 1001F <sub>2</sub> | 0110F <sub>1</sub> | 4.45(23) $\times 10^{-4}$   |
| 379       | Octad  | 2     | 0(0, 0A <sub>1</sub> ) | 1001F <sub>2</sub> | 0110F <sub>2</sub> | 0.0                         |
| 380       | Octad  | 3     | 1(1, 0F <sub>1</sub> ) | 1001F <sub>2</sub> | 0110F <sub>2</sub> | 6.59(31) $\times 10^{-1}$   |
| 381       | Octad  | 4     | 2(0, 0A <sub>1</sub> ) | 1001F <sub>2</sub> | 0110F <sub>2</sub> | 0.0                         |
| 382       | Octad  | 4     | 2(2, 0E )              | 1001F <sub>2</sub> | 0110F <sub>2</sub> | 2.245(94) $\times 10^{-2}$  |
| 383       | Octad  | 4     | 2(2, 0F <sub>2</sub> ) | 1001F <sub>2</sub> | 0110F <sub>2</sub> | 1.43(12) $\times 10^{-2}$   |
| 384       | Octad  | 5     | 3(1, 0F <sub>1</sub> ) | 1001F <sub>2</sub> | 0110F <sub>2</sub> | 0.0                         |
| 385       | Octad  | 5     | 3(3, 0F <sub>1</sub> ) | 1001F <sub>2</sub> | 0110F <sub>2</sub> | 5.35(21) $\times 10^{-4}$   |
| 386       | Octad  | 5     | 3(3, 0F <sub>2</sub> ) | 1001F <sub>2</sub> | 0110F <sub>2</sub> | 1.71(33) $\times 10^{-4}$   |
| 387       | Octad  | 4     | 2(2, 0F <sub>2</sub> ) | 1001F <sub>2</sub> | 0011A <sub>1</sub> | -2.529(48) $\times 10^{-2}$ |
| 388       | Octad  | 5     | 3(3, 0F <sub>2</sub> ) | 1001F <sub>2</sub> | 0011A <sub>1</sub> | -5.06(20) $\times 10^{-4}$  |
| 389       | Octad  | 3     | 1(1, 0F <sub>1</sub> ) | 1001F <sub>2</sub> | 0011E              | 5.34(14) $\times 10^{-1}$   |
| 390       | Octad  | 4     | 2(2, 0F <sub>2</sub> ) | 1001F <sub>2</sub> | 0011E              | 3.47(64) $\times 10^{-3}$   |
| 391       | Octad  | 5     | 3(1, 0F <sub>1</sub> ) | 1001F <sub>2</sub> | 0011E              | 8.96(16) $\times 10^{-4}$   |
| 392       | Octad  | 5     | 3(3, 0F <sub>1</sub> ) | 1001F <sub>2</sub> | 0011E              | -1.47(17) $\times 10^{-4}$  |
| 393       | Octad  | 5     | 3(3, 0F <sub>2</sub> ) | 1001F <sub>2</sub> | 0011E              | -4.94(15) $\times 10^{-4}$  |
| 394       | Octad  | 3     | 1(1, 0F <sub>1</sub> ) | 1001F <sub>2</sub> | 0011F <sub>1</sub> | -9.090(97) $\times 10^{-1}$ |
| 395       | Octad  | 4     | 2(2, 0E )              | 1001F <sub>2</sub> | 0011F <sub>1</sub> | 9.51(39) $\times 10^{-3}$   |
| 396       | Octad  | 4     | 2(2, 0F <sub>2</sub> ) | 1001F <sub>2</sub> | 0011F <sub>1</sub> | 3.333(45) $\times 10^{-2}$  |
| 397       | Octad  | 5     | 3(1, 0F <sub>1</sub> ) | 1001F <sub>2</sub> | 0011F <sub>1</sub> | -1.284(13) $\times 10^{-3}$ |
| 398       | Octad  | 5     | 3(3, 0A <sub>2</sub> ) | 1001F <sub>2</sub> | 0011F <sub>1</sub> | 5.952(73) $\times 10^{-4}$  |
| 399       | Octad  | 5     | 3(3, 0F <sub>1</sub> ) | 1001F <sub>2</sub> | 0011F <sub>1</sub> | 9.6(1.4) $\times 10^{-5}$   |
| 400       | Octad  | 5     | 3(3, 0F <sub>2</sub> ) | 1001F <sub>2</sub> | 0011F <sub>1</sub> | 3.9(1.7) $\times 10^{-5}$   |



Table I (continued).

| Parameter | Polyad | Order | $\Omega(K, nC)$        | $\{s\}$ $C_1$      | $\{s'\}$ $C_2$     | Value / $\text{cm}^{-1}$       |
|-----------|--------|-------|------------------------|--------------------|--------------------|--------------------------------|
| 401       | Octad  | 2     | 0(0, 0A <sub>1</sub> ) | 1001F <sub>2</sub> | 0011F <sub>2</sub> | 1.163(96)                      |
| 402       | Octad  | 3     | 1(1, 0F <sub>1</sub> ) | 1001F <sub>2</sub> | 0011F <sub>2</sub> | -9.81(19) × 10 <sup>-1</sup>   |
| 403       | Octad  | 4     | 2(0, 0A <sub>1</sub> ) | 1001F <sub>2</sub> | 0011F <sub>2</sub> | 2.120(41) × 10 <sup>-2</sup>   |
| 404       | Octad  | 4     | 2(2, 0E )              | 1001F <sub>2</sub> | 0011F <sub>2</sub> | 5.167(52) × 10 <sup>-2</sup>   |
| 405       | Octad  | 4     | 2(2, 0F <sub>2</sub> ) | 1001F <sub>2</sub> | 0011F <sub>2</sub> | 2.730(57) × 10 <sup>-2</sup>   |
| 406       | Octad  | 5     | 3(1, 0F <sub>1</sub> ) | 1001F <sub>2</sub> | 0011F <sub>2</sub> | 0.0                            |
| 407       | Octad  | 5     | 3(3, 0F <sub>1</sub> ) | 1001F <sub>2</sub> | 0011F <sub>2</sub> | -1.49(12) × 10 <sup>-4</sup>   |
| 408       | Octad  | 5     | 3(3, 0F <sub>2</sub> ) | 1001F <sub>2</sub> | 0011F <sub>2</sub> | -7.54(16) × 10 <sup>-4</sup>   |
| 409       | Octad  | 4     | 1(1, 0F <sub>1</sub> ) | 1001F <sub>2</sub> | 0300E              | 0.0                            |
| 410       | Octad  | 5     | 2(2, 0F <sub>2</sub> ) | 1001F <sub>2</sub> | 0300E              | 0.0                            |
| 411       | Octad  | 5     | 2(2, 0F <sub>2</sub> ) | 1001F <sub>2</sub> | 0300A <sub>1</sub> | -1.603(36) × 10 <sup>-2</sup>  |
| 412       | Octad  | 4     | 1(1, 0F <sub>1</sub> ) | 1001F <sub>2</sub> | 0300A <sub>2</sub> | 0.0                            |
| 413       | Octad  | 3     | 0(0, 0A <sub>1</sub> ) | 1001F <sub>2</sub> | 0201F <sub>2</sub> | 2.565(48)                      |
| 414       | Octad  | 4     | 1(1, 0F <sub>1</sub> ) | 1001F <sub>2</sub> | 0201F <sub>2</sub> | -6.66(11) × 10 <sup>-1</sup>   |
| 415       | Octad  | 5     | 2(0, 0A <sub>1</sub> ) | 1001F <sub>2</sub> | 0201F <sub>2</sub> | 1.512(18) × 10 <sup>-2</sup>   |
| 416       | Octad  | 5     | 2(2, 0E )              | 1001F <sub>2</sub> | 0201F <sub>2</sub> | -6.3(2.5) × 10 <sup>-4</sup>   |
| 417       | Octad  | 5     | 2(2, 0F <sub>2</sub> ) | 1001F <sub>2</sub> | 0201F <sub>2</sub> | 0.0                            |
| 418       | Octad  | 4     | 1(1, 0F <sub>1</sub> ) | 1001F <sub>2</sub> | 0201F <sub>1</sub> | 0.0                            |
| 419       | Octad  | 5     | 2(2, 0E )              | 1001F <sub>2</sub> | 0201F <sub>1</sub> | -8.58(18) × 10 <sup>-3</sup>   |
| 420       | Octad  | 5     | 2(2, 0F <sub>2</sub> ) | 1001F <sub>2</sub> | 0201F <sub>1</sub> | 6.21(39) × 10 <sup>-3</sup>    |
| 421       | Octad  | 3     | 0(0, 0A <sub>1</sub> ) | 1001F <sub>2</sub> | 0201F <sub>2</sub> | 0.0                            |
| 422       | Octad  | 4     | 1(1, 0F <sub>1</sub> ) | 1001F <sub>2</sub> | 0201F <sub>2</sub> | 1.4539(98)                     |
| 423       | Octad  | 5     | 2(0, 0A <sub>1</sub> ) | 1001F <sub>2</sub> | 0201F <sub>2</sub> | -0.996(23) × 10 <sup>-2</sup>  |
| 424       | Octad  | 5     | 2(2, 0E )              | 1001F <sub>2</sub> | 0201F <sub>2</sub> | -1.508(28) × 10 <sup>-2</sup>  |
| 425       | Octad  | 5     | 2(2, 0F <sub>2</sub> ) | 1001F <sub>2</sub> | 0201F <sub>2</sub> | -2.526(34) × 10 <sup>-2</sup>  |
| 426       | Octad  | 4     | 1(1, 0F <sub>1</sub> ) | 1001F <sub>2</sub> | 0102E              | 3.05(13) × 10 <sup>-1</sup>    |
| 427       | Octad  | 5     | 2(2, 0F <sub>2</sub> ) | 1001F <sub>2</sub> | 0102E              | -2.040(30) × 10 <sup>-2</sup>  |
| 428       | Octad  | 5     | 2(2, 0F <sub>2</sub> ) | 1001F <sub>2</sub> | 0102A <sub>1</sub> | -9.74(34) × 10 <sup>-3</sup>   |
| 429       | Octad  | 4     | 1(1, 0F <sub>1</sub> ) | 1001F <sub>2</sub> | 0102A <sub>2</sub> | -1.633(74) × 10 <sup>-1</sup>  |
| 430       | Octad  | 4     | 1(1, 0F <sub>1</sub> ) | 1001F <sub>2</sub> | 0102E              | -3.54(12) × 10 <sup>-1</sup>   |
| 431       | Octad  | 5     | 2(2, 0F <sub>2</sub> ) | 1001F <sub>2</sub> | 0102E              | 6.52(38) × 10 <sup>-3</sup>    |
| 432       | Octad  | 4     | 1(1, 0F <sub>1</sub> ) | 1001F <sub>2</sub> | 0102F <sub>1</sub> | 8.952(84) × 10 <sup>-1</sup>   |
| 433       | Octad  | 5     | 2(2, 0E )              | 1001F <sub>2</sub> | 0102F <sub>1</sub> | 4.06(28) × 10 <sup>-3</sup>    |
| 434       | Octad  | 5     | 2(2, 0F <sub>2</sub> ) | 1001F <sub>2</sub> | 0102F <sub>1</sub> | 1.252(36) × 10 <sup>-2</sup>   |
| 435       | Octad  | 3     | 0(0, 0A <sub>1</sub> ) | 1001F <sub>2</sub> | 0102F <sub>2</sub> | 6.85(55) × 10 <sup>-1</sup>    |
| 436       | Octad  | 4     | 1(1, 0F <sub>1</sub> ) | 1001F <sub>2</sub> | 0102F <sub>2</sub> | 0.0                            |
| 437       | Octad  | 5     | 2(0, 0A <sub>1</sub> ) | 1001F <sub>2</sub> | 0102F <sub>2</sub> | -1.210(25) × 10 <sup>-2</sup>  |
| 438       | Octad  | 5     | 2(2, 0E )              | 1001F <sub>2</sub> | 0102F <sub>2</sub> | 4.26(30) × 10 <sup>-3</sup>    |
| 439       | Octad  | 5     | 2(2, 0F <sub>2</sub> ) | 1001F <sub>2</sub> | 0102F <sub>2</sub> | 1.001(34) × 10 <sup>-2</sup>   |
| 440       | Octad  | 3     | 0(0, 0A <sub>1</sub> ) | 1001F <sub>2</sub> | 0003F <sub>2</sub> | 0.0                            |
| 441       | Octad  | 4     | 1(1, 0F <sub>1</sub> ) | 1001F <sub>2</sub> | 0003F <sub>2</sub> | -1.364(93) × 10 <sup>-1</sup>  |
| 442       | Octad  | 5     | 2(0, 0A <sub>1</sub> ) | 1001F <sub>2</sub> | 0003F <sub>2</sub> | -4.00(29) × 10 <sup>-3</sup>   |
| 443       | Octad  | 5     | 2(2, 0E )              | 1001F <sub>2</sub> | 0003F <sub>2</sub> | 5.6(3.4) × 10 <sup>-4</sup>    |
| 444       | Octad  | 5     | 2(2, 0F <sub>2</sub> ) | 1001F <sub>2</sub> | 0003F <sub>2</sub> | -7.81(39) × 10 <sup>-3</sup>   |
| 445       | Octad  | 5     | 2(2, 0F <sub>2</sub> ) | 1001F <sub>2</sub> | 0003A <sub>1</sub> | 5.89(36) × 10 <sup>-3</sup>    |
| 446       | Octad  | 4     | 1(1, 0F <sub>1</sub> ) | 1001F <sub>2</sub> | 0003F <sub>1</sub> | -2.02(15) × 10 <sup>-1</sup>   |
| 447       | Octad  | 5     | 2(2, 0E )              | 1001F <sub>2</sub> | 0003F <sub>1</sub> | 0.0                            |
| 448       | Octad  | 5     | 2(2, 0F <sub>2</sub> ) | 1001F <sub>2</sub> | 0003F <sub>1</sub> | 0.0                            |
| 449       | Octad  | 3     | 0(0, 0A <sub>1</sub> ) | 1001F <sub>2</sub> | 0003F <sub>2</sub> | -2.996(91)                     |
| 450       | Octad  | 4     | 1(1, 0F <sub>1</sub> ) | 1001F <sub>2</sub> | 0003F <sub>2</sub> | -3.84(11) × 10 <sup>-1</sup>   |
| 451       | Octad  | 5     | 2(0, 0A <sub>1</sub> ) | 1001F <sub>2</sub> | 0003F <sub>2</sub> | 0.0                            |
| 452       | Octad  | 5     | 2(2, 0E )              | 1001F <sub>2</sub> | 0003F <sub>2</sub> | -5.92(35) × 10 <sup>-3</sup>   |
| 453       | Octad  | 5     | 2(2, 0F <sub>2</sub> ) | 1001F <sub>2</sub> | 0003F <sub>2</sub> | 9.36(48) × 10 <sup>-3</sup>    |
| 454       | Octad  | 2     | 0(0, 0A <sub>1</sub> ) | 0110F <sub>1</sub> | 0110F <sub>1</sub> | -15.188(13)                    |
| 455       | Octad  | 3     | 1(1, 0F <sub>1</sub> ) | 0110F <sub>1</sub> | 0110F <sub>1</sub> | -2.4232(92) × 10 <sup>-1</sup> |
| 456       | Octad  | 4     | 2(0, 0A <sub>1</sub> ) | 0110F <sub>1</sub> | 0110F <sub>1</sub> | -3.65(43) × 10 <sup>-3</sup>   |
| 457       | Octad  | 4     | 2(2, 0E )              | 0110F <sub>1</sub> | 0110F <sub>1</sub> | 1.211(57) × 10 <sup>-2</sup>   |
| 458       | Octad  | 4     | 2(2, 0F <sub>2</sub> ) | 0110F <sub>1</sub> | 0110F <sub>1</sub> | 2.734(45) × 10 <sup>-2</sup>   |
| 459       | Octad  | 5     | 3(1, 0F <sub>1</sub> ) | 0110F <sub>1</sub> | 0110F <sub>1</sub> | 0.0                            |
| 460       | Octad  | 5     | 3(3, 0F <sub>1</sub> ) | 0110F <sub>1</sub> | 0110F <sub>1</sub> | 5.28(12) × 10 <sup>-4</sup>    |
| 461       | Octad  | 3     | 1(1, 0F <sub>1</sub> ) | 0110F <sub>1</sub> | 0110F <sub>2</sub> | 2.341(24) × 10 <sup>-1</sup>   |
| 462       | Octad  | 4     | 2(2, 0E )              | 0110F <sub>1</sub> | 0110F <sub>2</sub> | -9.33(24) × 10 <sup>-3</sup>   |
| 463       | Octad  | 4     | 2(2, 0F <sub>2</sub> ) | 0110F <sub>1</sub> | 0110F <sub>2</sub> | 4.07(35) × 10 <sup>-3</sup>    |
| 464       | Octad  | 5     | 3(1, 0F <sub>1</sub> ) | 0110F <sub>1</sub> | 0110F <sub>2</sub> | 5.16(10) × 10 <sup>-4</sup>    |
| 465       | Octad  | 5     | 3(3, 0A <sub>2</sub> ) | 0110F <sub>1</sub> | 0110F <sub>2</sub> | 6.288(71) × 10 <sup>-4</sup>   |
| 466       | Octad  | 5     | 3(3, 0F <sub>1</sub> ) | 0110F <sub>1</sub> | 0110F <sub>2</sub> | -1.481(81) × 10 <sup>-4</sup>  |
| 467       | Octad  | 5     | 3(3, 0F <sub>2</sub> ) | 0110F <sub>1</sub> | 0110F <sub>2</sub> | -4.01(10) × 10 <sup>-4</sup>   |
| 468       | Octad  | 2     | 0(0, 0A <sub>1</sub> ) | 0110F <sub>2</sub> | 0110F <sub>2</sub> | -9.057(17)                     |
| 469       | Octad  | 3     | 1(1, 0F <sub>1</sub> ) | 0110F <sub>2</sub> | 0110F <sub>2</sub> | -6.167(32) × 10 <sup>-1</sup>  |
| 470       | Octad  | 4     | 2(0, 0A <sub>1</sub> ) | 0110F <sub>2</sub> | 0110F <sub>2</sub> | 0.0                            |
| 471       | Octad  | 4     | 2(2, 0E )              | 0110F <sub>2</sub> | 0110F <sub>2</sub> | 6.28(15) × 10 <sup>-3</sup>    |
| 472       | Octad  | 4     | 2(2, 0F <sub>2</sub> ) | 0110F <sub>2</sub> | 0110F <sub>2</sub> | 3.692(47) × 10 <sup>-2</sup>   |
| 473       | Octad  | 5     | 3(1, 0F <sub>1</sub> ) | 0110F <sub>2</sub> | 0110F <sub>2</sub> | 0.0                            |
| 474       | Octad  | 5     | 3(3, 0F <sub>1</sub> ) | 0110F <sub>2</sub> | 0110F <sub>2</sub> | 0.0                            |
| 475       | Octad  | 3     | 1(1, 0F <sub>1</sub> ) | 0110F <sub>1</sub> | 0011A <sub>1</sub> | 6.79(18) × 10 <sup>-1</sup>    |
| 476       | Octad  | 5     | 3(1, 0F <sub>1</sub> ) | 0110F <sub>1</sub> | 0011A <sub>1</sub> | 1.192(12) × 10 <sup>-3</sup>   |
| 477       | Octad  | 5     | 3(3, 0F <sub>1</sub> ) | 0110F <sub>1</sub> | 0011A <sub>1</sub> | -3.298(99) × 10 <sup>-4</sup>  |
| 478       | Octad  | 3     | 1(1, 0F <sub>1</sub> ) | 0110F <sub>1</sub> | 0011E              | -2.02(26) × 10 <sup>-1</sup>   |
| 479       | Octad  | 4     | 2(2, 0F <sub>2</sub> ) | 0110F <sub>1</sub> | 0011E              | 3.270(55) × 10 <sup>-2</sup>   |
| 480       | Octad  | 5     | 3(1, 0F <sub>1</sub> ) | 0110F <sub>1</sub> | 0011E              | 8.64(92) × 10 <sup>-5</sup>    |

Table I (continued).

| Parameter | Polyad | Order | $\Omega(K, nC)$        | $\{s\}$ $C_1$      | $\{s'\}$ $C_2$     | Value / $\text{cm}^{-1}$      |
|-----------|--------|-------|------------------------|--------------------|--------------------|-------------------------------|
| 481       | Octad  | 5     | 3(3, 0F <sub>1</sub> ) | 0110F <sub>1</sub> | 0011E              | 8.278(88) × 10 <sup>-4</sup>  |
| 482       | Octad  | 5     | 3(3, 0F <sub>2</sub> ) | 0110F <sub>1</sub> | 0011E              | -2.17(12) × 10 <sup>-4</sup>  |
| 483       | Octad  | 2     | 0(0, 0A <sub>1</sub> ) | 0110F <sub>1</sub> | 0011F <sub>1</sub> | 0.0                           |
| 484       | Octad  | 3     | 1(1, 0F <sub>1</sub> ) | 0110F <sub>1</sub> | 0011F <sub>1</sub> | 1.523(19)                     |
| 485       | Octad  | 4     | 2(0, 0A <sub>1</sub> ) | 0110F <sub>1</sub> | 0011F <sub>1</sub> | 0.0                           |
| 486       | Octad  | 4     | 2(2, 0E )              | 0110F <sub>1</sub> | 0011F <sub>1</sub> | 3.139(59) × 10 <sup>-2</sup>  |
| 487       | Octad  | 4     | 2(2, 0F <sub>2</sub> ) | 0110F <sub>1</sub> | 0011F <sub>1</sub> | 1.402(90) × 10 <sup>-2</sup>  |
| 488       | Octad  | 5     | 3(1, 0F <sub>1</sub> ) | 0110F <sub>1</sub> | 0011F <sub>1</sub> | 7.4(1.4) × 10 <sup>-5</sup>   |
| 489       | Octad  | 5     | 3(3, 0F <sub>1</sub> ) | 0110F <sub>1</sub> | 0011F <sub>1</sub> | -1.308(12) × 10 <sup>-3</sup> |
| 490       | Octad  | 5     | 3(3, 0F <sub>2</sub> ) | 0110F <sub>1</sub> | 0011F <sub>1</sub> | -3.29(18) × 10 <sup>-4</sup>  |
| 491       | Octad  | 3     | 1(1, 0F <sub>1</sub> ) | 0110F <sub>1</sub> | 0011F <sub>2</sub> | -3.72(24) × 10 <sup>-1</sup>  |
| 492       | Octad  | 4     | 2(2, 0E )              | 0110F <sub>1</sub> | 0011F <sub>2</sub> | 2.235(44) × 10 <sup>-2</sup>  |
| 493       | Octad  | 4     | 2(2, 0F <sub>2</sub> ) | 0110F <sub>1</sub> | 0011F <sub>2</sub> | -2.932(80) × 10 <sup>-2</sup> |
| 494       | Octad  | 5     | 3(1, 0F <sub>1</sub> ) | 0110F <sub>1</sub> | 0011F <sub>2</sub> | -5.90(12) × 10 <sup>-4</sup>  |
| 495       | Octad  | 5     | 3(3, 0A <sub>2</sub> ) | 0110F <sub>1</sub> | 0011F <sub>2</sub> | 1.404(76) × 10 <sup>-4</sup>  |
| 496       | Octad  | 5     | 3(3, 0F <sub>1</sub> ) | 0110F <sub>1</sub> | 0011F <sub>2</sub> | 2.55(14) × 10 <sup>-4</sup>   |
| 497       | Octad  | 5     | 3(3, 0F <sub>2</sub> ) | 0110F <sub>1</sub> | 0011F <sub>2</sub> | 1.89(13) × 10 <sup>-4</sup>   |
| 498       | Octad  | 4     | 2(2, 0F <sub>2</sub> ) | 0110F <sub>2</sub> | 0011A <sub>1</sub> | -7.677(74) × 10 <sup>-2</sup> |
| 499       | Octad  | 5     | 3(3, 0F <sub>2</sub> ) | 0110F <sub>2</sub> | 0011A <sub>1</sub> | -7.41(11) × 10 <sup>-4</sup>  |
| 500       | Octad  | 3     | 1(1, 0F <sub>1</sub> ) | 0110F <sub>2</sub> | 0011E              | 1.530(21)                     |
| 501       | Octad  | 4     | 2(2, 0F <sub>2</sub> ) | 0110F <sub>2</sub> | 0011E              | -7.693(72) × 10 <sup>-2</sup> |
| 502       | Octad  | 5     | 3(1, 0F <sub>1</sub> ) | 0110F <sub>2</sub> | 0011E              | 1.93(14) × 10 <sup>-4</sup>   |
| 503       | Octad  | 5     | 3(3, 0F <sub>1</sub> ) | 0110F <sub>2</sub> | 0011E              | 3.61(15) × 10 <sup>-4</sup>   |
| 504       | Octad  | 5     | 3(3, 0F <sub>2</sub> ) | 0110F <sub>2</sub> | 0011E              | -5.74(15) × 10 <sup>-4</sup>  |
| 505       | Octad  | 3     | 1(1, 0F <sub>1</sub> ) | 0110F <sub>2</sub> | 0011F <sub>1</sub> | -1.165(16)                    |
| 506       | Octad  | 4     | 2(2, 0E )              | 0110F <sub>2</sub> | 0011F <sub>1</sub> | 2.70(37) × 10 <sup>-3</sup>   |
| 507       | Octad  | 4     | 2(2, 0F <sub>2</sub> ) | 0110F <sub>2</sub> | 0011F <sub>1</sub> | 4.929(75) × 10 <sup>-2</sup>  |
| 508       | Octad  | 5     | 3(1, 0F <sub>1</sub> ) | 0110F <sub>2</sub> | 0011F <sub>1</sub> | -1.215(13) × 10 <sup>-3</sup> |
| 509       | Octad  | 5     | 3(3, 0A <sub>2</sub> ) | 0110F <sub>2</sub> | 0011F <sub>1</sub> | 1.408(77) × 10 <sup>-4</sup>  |
| 510       | Octad  | 5     | 3(3, 0F <sub>1</sub> ) | 0110F <sub>2</sub> | 0011F <sub>1</sub> | -1.124(14) × 10 <sup>-3</sup> |
| 511       | Octad  | 5     | 3(3, 0F <sub>2</sub> ) | 0110F <sub>2</sub> | 0011F <sub>1</sub> | 3.54(10) × 10 <sup>-4</sup>   |
| 512       | Octad  | 2     | 0(0, 0A <sub>1</sub> ) | 0110F <sub>2</sub> | 0011F <sub>2</sub> | 0.0                           |
| 513       | Octad  | 3     | 1(1, 0F <sub>1</sub> ) | 0110F <sub>2</sub> | 0011F <sub>2</sub> | 1.495(20)                     |
| 514       | Octad  | 4     | 2(0, 0A <sub>1</sub> ) | 0110F <sub>2</sub> | 0011F <sub>2</sub> | 0.0                           |
| 515       | Octad  | 4     | 2(2, 0E )              | 0110F <sub>2</sub> | 0011F <sub>2</sub> | 2.193(73) × 10 <sup>-2</sup>  |
| 516       | Octad  | 4     | 2(2, 0F <sub>2</sub> ) | 0110F <sub>2</sub> | 0011F <sub>2</sub> | 3.804(74) × 10 <sup>-2</sup>  |
| 517       | Octad  | 5     | 3(1, 0F <sub>1</sub> ) | 0110F <sub>2</sub> | 0011F <sub>2</sub> | -6.95(15) × 10 <sup>-4</sup>  |
| 518       | Octad  | 5     | 3(3, 0F <sub>1</sub> ) | 0110F <sub>2</sub> | 0011F <sub>2</sub> | 0.0                           |
| 519       | Octad  | 5     | 3(3, 0F <sub>2</sub> ) | 0110F <sub>2</sub> | 0011F <sub>2</sub> | -2.74(15) × 10 <sup>-4</sup>  |
| 520       | Octad  | 4     | 1(1, 0F <sub>1</sub> ) | 0110F <sub>1</sub> | 0300E              | 0.0                           |
| 521       | Octad  | 5     | 2(2, 0F <sub>2</sub> ) | 0110F <sub>1</sub> | 0300E              | -7.59(37) × 10 <sup>-3</sup>  |
| 522       | Octad  | 4     | 1(1, 0F <sub>1</sub> ) | 0110F <sub>1</sub> | 0300A <sub>1</sub> | -2.933(75) × 10 <sup>-1</sup> |
| 523       | Octad  | 5     | 2(2, 0F <sub>2</sub> ) | 0110F <sub>1</sub> | 0300A <sub>2</sub> | -4.39(31) × 10 <sup>-3</sup>  |
| 524       | Octad  | 4     | 1(1, 0F <sub>1</sub> ) | 0110F <sub>2</sub> | 0300E              | 4.15(11) × 10 <sup>-1</sup>   |
| 525       | Octad  | 5     | 2(2, 0F <sub>2</sub> ) | 0110F <sub>2</sub> | 0300E              | 3.317(49) × 10 <sup>-2</sup>  |
| 526       | Octad  | 5     | 2(2, 0F <sub>2</sub> ) | 0110F <sub>2</sub> | 0300A <sub>1</sub> | -3.33(35) × 10 <sup>-3</sup>  |
| 527       | Octad  | 4     | 1(1, 0F <sub>1</sub> ) | 0110F <sub>2</sub> | 0300A <sub>2</sub> | -4.80(28) × 10 <sup>-2</sup>  |
| 528       | Octad  | 4     | 1(1, 0F <sub>1</sub> ) | 0110F <sub>1</sub> | 0201F <sub>2</sub> | -7.61(13) × 10 <sup>-1</sup>  |
| 529       | Octad  | 5     | 2(2, 0E )              | 0110F <sub>1</sub> | 0201F <sub>2</sub> | 1.255(38) × 10 <sup>-2</sup>  |
| 530       | Octad  | 5     | 2(2, 0F <sub>2</sub> ) | 0110F <sub>1</sub> | 0201F <sub>2</sub> | 1.515(58) × 10 <sup>-2</sup>  |
| 531       | Octad  | 3     | 0(0, 0A <sub>1</sub> ) | 0110F <sub>1</sub> | 0201F <sub>1</sub> | 2.208(54)                     |
| 532       | Octad  | 4     | 1(1, 0F <sub>1</sub> ) | 0110F <sub>1</sub> | 0201F <sub>1</sub> | -5.5(1.1) × 10 <sup>-2</sup>  |
| 533       | Octad  | 5     | 2(0, 0A <sub>1</sub> ) | 0110F <sub>1</sub> | 0201F <sub>1</sub> | -5.24(34) × 10 <sup>-3</sup>  |
| 534       | Octad  | 5     | 2(2, 0E )              | 0110F <sub>1</sub> | 0201F <sub>1</sub> | 0.0                           |
| 535       | Octad  | 5     | 2(2, 0F <sub>2</sub> ) | 0110F <sub>1</sub> | 0201F <sub>1</sub> | -1.680(50) × 10 <sup>-2</sup> |
| 536       | Octad  | 4     | 1(1, 0F <sub>1</sub> ) | 0110F <sub>1</sub> | 0201F <sub>2</sub> | -3.76(13) × 10 <sup>-1</sup>  |
| 537       | Octad  | 5     | 2(2, 0E )              | 0110F <sub>1</sub> | 0201F <sub>2</sub> | -1.355(29) × 10 <sup>-2</sup> |
| 538       | Octad  | 5     | 2(2, 0F <sub>2</sub> ) | 0110F <sub>1</sub> | 0201F <sub>2</sub> | -7.89(46) × 10 <sup>-3</sup>  |
| 539       | Octad  | 3     | 0(0, 0A <sub>1</sub> ) | 0110F <sub>2</sub> | 0201F <sub>2</sub> | 7.938(72)                     |
| 540       | Octad  | 4     | 1(1, 0F <sub>1</sub> ) | 0110F <sub>2</sub> | 0201F <sub>2</sub> | 3.09(17) × 10 <sup>-1</sup>   |
| 541       | Octad  | 5     | 2(0, 0A <sub>1</sub> ) | 0110F <sub>2</sub> | 0201F <sub>2</sub> | -2.630(37) × 10 <sup>-2</sup> |
| 542       | Octad  | 5     | 2(2, 0E )              | 0110F <sub>2</sub> | 0201F <sub>2</sub> | -1.031(45) × 10 <sup>-2</sup> |
| 543       | Octad  | 5     | 2(2, 0F <sub>2</sub> ) | 0110F <sub>2</sub> | 0201F <sub>2</sub> | 0.0                           |
| 544       | Octad  | 4     | 1(1, 0F <sub>1</sub> ) | 0110F <sub>2</sub> | 0201F <sub>1</sub> | 4.23(14) × 10 <sup>-1</sup>   |
| 545       | Octad  | 5     | 2(2, 0E )              | 0110F <sub>2</sub> | 0201F <sub>1</sub> | 1.634(36) × 10 <sup>-2</sup>  |
| 546       | Octad  | 5     | 2(2, 0F <sub>2</sub> ) | 0110F <sub>2</sub> | 0201F <sub>1</sub> | 0.0                           |
| 547       | Octad  | 3     | 0(0, 0A <sub>1</sub> ) | 0110F <sub>2</sub> | 0201F <sub>2</sub> | 0.0                           |
| 548       | Octad  | 4     | 1(1, 0F <sub>1</sub> ) | 0110F <sub>2</sub> | 0201F <sub>2</sub> | 2.0(1.1) × 10 <sup>-2</sup>   |
| 549       | Octad  | 5     | 2(0, 0A <sub>1</sub> ) | 0110F <sub>2</sub> | 0201F <sub>2</sub> | 2.99(32) × 10 <sup>-3</sup>   |
| 550       | Octad  | 5     | 2(2, 0E )              | 0110F <sub>2</sub> | 0201F <sub>2</sub> | -9.28(40) × 10 <sup>-3</sup>  |
| 551       | Octad  | 5     | 2(2, 0F <sub>2</sub> ) | 0110F <sub>2</sub> | 0201F <sub>2</sub> | 1.188(55) × 10 <sup>-2</sup>  |
| 552       | Octad  | 4     | 1(1, 0F <sub>1</sub> ) | 0110F <sub>1</sub> | 0102E              | -6.18(26) × 10 <sup>-1</sup>  |
| 553       | Octad  | 5     | 2(2, 0F <sub>2</sub> ) | 0110F <sub>1</sub> | 0102E              | 4.865(71) × 10 <sup>-2</sup>  |
| 554       | Octad  | 4     | 1(1, 0F <sub>1</sub> ) | 0110F <sub>1</sub> | 0102A <sub>1</sub> | 1.404(25)                     |
| 555       | Octad  | 5     | 2(2, 0F <sub>2</sub> ) | 0110F <sub>1</sub> | 0102A <sub>2</sub> | -1.020(74) × 10 <sup>-2</sup> |
| 556       | Octad  | 4     | 1(1, 0F <sub>1</sub> ) | 0110F <sub>1</sub> | 0102E              | -1.83(24) × 10 <sup>-1</sup>  |
| 557       | Octad  | 5     | 2(2, 0F <sub>2</sub> ) | 0110F <sub>1</sub> | 0102E              | 8.16(63) × 10 <sup>-3</sup>   |
| 558       | Octad  | 3     | 0(0, 0A <sub>1</sub> ) | 0110F <sub>1</sub> | 0102F <sub>1</sub> | 7.4(1.4) × 10 <sup>-1</sup>   |
| 559       | Octad  | 4     | 1(1, 0F <sub>1</sub> ) | 0110F <sub>1</sub> | 0102F <sub>1</sub> | 0.0                           |
| 560       | Octad  | 5     | 2(0, 0A <sub>1</sub> ) | 0110F <sub>1</sub> | 0102F <sub>1</sub> | 4.39(41) × 10 <sup>-3</sup>   |



Table I (continued).

| Parameter | Polyad | Order | $\Omega(K, nC)$        | $\{s\}$ $C_1$      | $\{s'\}$ $C_2$     | Value / $\text{cm}^{-1}$      |
|-----------|--------|-------|------------------------|--------------------|--------------------|-------------------------------|
| 561       | Octad  | 5     | 2(2, 0E)               | 0110F <sub>1</sub> | 0102F <sub>1</sub> | 0.0                           |
| 562       | Octad  | 5     | 2(2, 0F <sub>2</sub> ) | 0110F <sub>1</sub> | 0102F <sub>1</sub> | 2.089(65) × 10 <sup>-2</sup>  |
| 563       | Octad  | 4     | 1(1, 0F <sub>1</sub> ) | 0110F <sub>1</sub> | 0102F <sub>2</sub> | 1.170(24)                     |
| 564       | Octad  | 5     | 2(2, 0E)               | 0110F <sub>1</sub> | 0102F <sub>2</sub> | -6.84(53) × 10 <sup>-3</sup>  |
| 565       | Octad  | 5     | 2(2, 0F <sub>2</sub> ) | 0110F <sub>1</sub> | 0102F <sub>2</sub> | 9.44(65) × 10 <sup>-3</sup>   |
| 566       | Octad  | 4     | 1(1, 0F <sub>1</sub> ) | 0110F <sub>2</sub> | 0102E              | 0.0                           |
| 567       | Octad  | 5     | 2(2, 0F <sub>2</sub> ) | 0110F <sub>2</sub> | 0102E              | -6.285(79) × 10 <sup>-2</sup> |
| 568       | Octad  | 5     | 2(2, 0F <sub>2</sub> ) | 0110F <sub>2</sub> | 0102A <sub>1</sub> | 3.01(78) × 10 <sup>-3</sup>   |
| 569       | Octad  | 4     | 1(1, 0F <sub>1</sub> ) | 0110F <sub>2</sub> | 0102A <sub>2</sub> | 3.5(2.6) × 10 <sup>-2</sup>   |
| 570       | Octad  | 4     | 1(1, 0F <sub>1</sub> ) | 0110F <sub>2</sub> | 0102E              | 1.38(24) × 10 <sup>-1</sup>   |
| 571       | Octad  | 5     | 2(2, 0F <sub>2</sub> ) | 0110F <sub>2</sub> | 0102E              | -4.379(81) × 10 <sup>-2</sup> |
| 572       | Octad  | 4     | 1(1, 0F <sub>1</sub> ) | 0110F <sub>2</sub> | 0102F <sub>1</sub> | -6.67(29) × 10 <sup>-1</sup>  |
| 573       | Octad  | 5     | 2(2, 0E)               | 0110F <sub>2</sub> | 0102F <sub>1</sub> | 3.77(47) × 10 <sup>-3</sup>   |
| 574       | Octad  | 5     | 2(2, 0F <sub>2</sub> ) | 0110F <sub>2</sub> | 0102F <sub>1</sub> | -2.830(71) × 10 <sup>-2</sup> |
| 575       | Octad  | 3     | 0(0, 0A <sub>1</sub> ) | 0110F <sub>2</sub> | 0102F <sub>2</sub> | 5.94(17)                      |
| 576       | Octad  | 4     | 1(1, 0F <sub>1</sub> ) | 0110F <sub>2</sub> | 0102F <sub>2</sub> | -4.66(24) × 10 <sup>-1</sup>  |
| 577       | Octad  | 5     | 2(0, 0A <sub>1</sub> ) | 0110F <sub>2</sub> | 0102F <sub>2</sub> | 0.0                           |
| 578       | Octad  | 5     | 2(2, 0E)               | 0110F <sub>2</sub> | 0102F <sub>2</sub> | 0.0                           |
| 579       | Octad  | 5     | 2(2, 0F <sub>2</sub> ) | 0110F <sub>2</sub> | 0102F <sub>2</sub> | -1.439(78) × 10 <sup>-2</sup> |
| 580       | Octad  | 4     | 1(1, 0F <sub>1</sub> ) | 0110F <sub>1</sub> | 0003F <sub>2</sub> | 0.0                           |
| 581       | Octad  | 5     | 2(2, 0E)               | 0110F <sub>1</sub> | 0003F <sub>2</sub> | 0.0                           |
| 582       | Octad  | 5     | 2(2, 0F <sub>2</sub> ) | 0110F <sub>1</sub> | 0003F <sub>2</sub> | -4.16(12) × 10 <sup>-2</sup>  |
| 583       | Octad  | 4     | 1(1, 0F <sub>1</sub> ) | 0110F <sub>1</sub> | 0003A <sub>1</sub> | -1.220(26)                    |
| 584       | Octad  | 3     | 0(0, 0A <sub>1</sub> ) | 0110F <sub>1</sub> | 0003F <sub>1</sub> | 0.0                           |
| 585       | Octad  | 4     | 1(1, 0F <sub>1</sub> ) | 0110F <sub>1</sub> | 0003F <sub>1</sub> | 1.131(28)                     |
| 586       | Octad  | 5     | 2(0, 0A <sub>1</sub> ) | 0110F <sub>1</sub> | 0003F <sub>1</sub> | 7.71(52) × 10 <sup>-3</sup>   |
| 587       | Octad  | 5     | 2(2, 0E)               | 0110F <sub>1</sub> | 0003F <sub>1</sub> | -1.263(80) × 10 <sup>-2</sup> |
| 588       | Octad  | 5     | 2(2, 0F <sub>2</sub> ) | 0110F <sub>1</sub> | 0003F <sub>1</sub> | 4.431(74) × 10 <sup>-2</sup>  |
| 589       | Octad  | 4     | 1(1, 0F <sub>1</sub> ) | 0110F <sub>1</sub> | 0003F <sub>2</sub> | 6.37(26) × 10 <sup>-1</sup>   |
| 590       | Octad  | 5     | 2(2, 0E)               | 0110F <sub>1</sub> | 0003F <sub>2</sub> | 3.041(70) × 10 <sup>-2</sup>  |
| 591       | Octad  | 5     | 2(2, 0F <sub>2</sub> ) | 0110F <sub>1</sub> | 0003F <sub>2</sub> | 1.55(10) × 10 <sup>-2</sup>   |
| 592       | Octad  | 3     | 0(0, 0A <sub>1</sub> ) | 0110F <sub>2</sub> | 0003F <sub>2</sub> | -2.65(29)                     |
| 593       | Octad  | 4     | 1(1, 0F <sub>1</sub> ) | 0110F <sub>2</sub> | 0003F <sub>2</sub> | -2.066(38)                    |
| 594       | Octad  | 5     | 2(0, 0A <sub>1</sub> ) | 0110F <sub>2</sub> | 0003F <sub>2</sub> | -1.327(51) × 10 <sup>-2</sup> |
| 595       | Octad  | 5     | 2(2, 0E)               | 0110F <sub>2</sub> | 0003F <sub>2</sub> | 1.116(77) × 10 <sup>-2</sup>  |
| 596       | Octad  | 5     | 2(2, 0F <sub>2</sub> ) | 0110F <sub>2</sub> | 0003F <sub>2</sub> | 0.0                           |
| 597       | Octad  | 5     | 2(2, 0F <sub>2</sub> ) | 0110F <sub>2</sub> | 0003A <sub>1</sub> | 0.0                           |
| 598       | Octad  | 4     | 1(1, 0F <sub>1</sub> ) | 0110F <sub>2</sub> | 0003F <sub>1</sub> | 8.11(37) × 10 <sup>-1</sup>   |
| 599       | Octad  | 5     | 2(2, 0E)               | 0110F <sub>2</sub> | 0003F <sub>1</sub> | -2.375(77) × 10 <sup>-2</sup> |
| 600       | Octad  | 5     | 2(2, 0F <sub>2</sub> ) | 0110F <sub>2</sub> | 0003F <sub>1</sub> | 0.0                           |
| 601       | Octad  | 3     | 0(0, 0A <sub>1</sub> ) | 0110F <sub>2</sub> | 0003F <sub>2</sub> | 1.57(36)                      |
| 602       | Octad  | 4     | 1(1, 0F <sub>1</sub> ) | 0110F <sub>2</sub> | 0003F <sub>2</sub> | 7.40(32) × 10 <sup>-1</sup>   |
| 603       | Octad  | 5     | 2(0, 0A <sub>1</sub> ) | 0110F <sub>2</sub> | 0003F <sub>2</sub> | -9.0(7.0) × 10 <sup>-4</sup>  |
| 604       | Octad  | 5     | 2(2, 0E)               | 0110F <sub>2</sub> | 0003F <sub>2</sub> | 0.0                           |
| 605       | Octad  | 5     | 2(2, 0F <sub>2</sub> ) | 0110F <sub>2</sub> | 0003F <sub>2</sub> | -3.31(11) × 10 <sup>-2</sup>  |
| 606       | Octad  | 2     | 0(0, 0A <sub>1</sub> ) | 0011A <sub>1</sub> | 0011A <sub>1</sub> | -8.820(40)                    |
| 607       | Octad  | 4     | 2(0, 0A <sub>1</sub> ) | 0011A <sub>1</sub> | 0011A <sub>1</sub> | 8.802(75) × 10 <sup>-2</sup>  |
| 608       | Octad  | 4     | 2(2, 0E)               | 0011A <sub>1</sub> | 0011E              | 1.799(40) × 10 <sup>-2</sup>  |
| 609       | Octad  | 3     | 1(1, 0F <sub>1</sub> ) | 0011A <sub>1</sub> | 0011F <sub>1</sub> | 3.991(18) × 10 <sup>-1</sup>  |
| 610       | Octad  | 5     | 3(1, 0F <sub>1</sub> ) | 0011A <sub>1</sub> | 0011F <sub>1</sub> | 9.0(1.3) × 10 <sup>-5</sup>   |
| 611       | Octad  | 5     | 3(3, 0F <sub>1</sub> ) | 0011A <sub>1</sub> | 0011F <sub>1</sub> | 5.893(87) × 10 <sup>-4</sup>  |
| 612       | Octad  | 4     | 2(2, 0F <sub>2</sub> ) | 0011A <sub>1</sub> | 0011F <sub>2</sub> | 4.182(40) × 10 <sup>-2</sup>  |
| 613       | Octad  | 5     | 3(3, 0F <sub>2</sub> ) | 0011A <sub>1</sub> | 0011F <sub>2</sub> | 9.71(14) × 10 <sup>-4</sup>   |
| 614       | Octad  | 2     | 0(0, 0A <sub>1</sub> ) | 0011E              | 0011E              | -5.451(32)                    |
| 615       | Octad  | 4     | 2(0, 0A <sub>1</sub> ) | 0011E              | 0011E              | 5.489(56) × 10 <sup>-2</sup>  |
| 616       | Octad  | 4     | 2(2, 0E)               | 0011E              | 0011E              | 3.442(53) × 10 <sup>-2</sup>  |
| 617       | Octad  | 5     | 3(3, 0A <sub>2</sub> ) | 0011E              | 0011E              | -6.703(76) × 10 <sup>-4</sup> |
| 618       | Octad  | 3     | 1(1, 0F <sub>1</sub> ) | 0011E              | 0011F <sub>1</sub> | 2.236(13) × 10 <sup>-1</sup>  |
| 619       | Octad  | 4     | 2(2, 0F <sub>2</sub> ) | 0011E              | 0011F <sub>1</sub> | 0.0                           |
| 620       | Octad  | 5     | 3(1, 0F <sub>1</sub> ) | 0011E              | 0011F <sub>1</sub> | 3.576(81) × 10 <sup>-4</sup>  |
| 621       | Octad  | 5     | 3(3, 0F <sub>1</sub> ) | 0011E              | 0011F <sub>1</sub> | 0.0                           |
| 622       | Octad  | 5     | 3(3, 0F <sub>2</sub> ) | 0011E              | 0011F <sub>1</sub> | -3.41(14) × 10 <sup>-4</sup>  |
| 623       | Octad  | 3     | 1(1, 0F <sub>1</sub> ) | 0011E              | 0011F <sub>2</sub> | -3.386(38) × 10 <sup>-1</sup> |
| 624       | Octad  | 4     | 2(2, 0F <sub>2</sub> ) | 0011E              | 0011F <sub>2</sub> | -1.976(38) × 10 <sup>-2</sup> |
| 625       | Octad  | 5     | 3(1, 0F <sub>1</sub> ) | 0011E              | 0011F <sub>2</sub> | -8.1(1.4) × 10 <sup>-5</sup>  |
| 626       | Octad  | 5     | 3(3, 0F <sub>1</sub> ) | 0011E              | 0011F <sub>2</sub> | -7.24(11) × 10 <sup>-4</sup>  |
| 627       | Octad  | 5     | 3(3, 0F <sub>2</sub> ) | 0011E              | 0011F <sub>2</sub> | 2.157(86) × 10 <sup>-4</sup>  |
| 628       | Octad  | 2     | 0(0, 0A <sub>1</sub> ) | 0011F <sub>1</sub> | 0011F <sub>1</sub> | -8.962(21)                    |
| 629       | Octad  | 3     | 1(1, 0F <sub>1</sub> ) | 0011F <sub>1</sub> | 0011F <sub>1</sub> | 3.718(16) × 10 <sup>-1</sup>  |
| 630       | Octad  | 4     | 2(0, 0A <sub>1</sub> ) | 0011F <sub>1</sub> | 0011F <sub>1</sub> | -2.789(37) × 10 <sup>-2</sup> |
| 631       | Octad  | 4     | 2(2, 0E)               | 0011F <sub>1</sub> | 0011F <sub>1</sub> | 4.178(38) × 10 <sup>-2</sup>  |
| 632       | Octad  | 4     | 2(2, 0F <sub>2</sub> ) | 0011F <sub>1</sub> | 0011F <sub>1</sub> | 4.533(53) × 10 <sup>-2</sup>  |
| 633       | Octad  | 5     | 3(1, 0F <sub>1</sub> ) | 0011F <sub>1</sub> | 0011F <sub>1</sub> | 0.0                           |
| 634       | Octad  | 5     | 3(3, 0F <sub>1</sub> ) | 0011F <sub>1</sub> | 0011F <sub>1</sub> | -7.59(14) × 10 <sup>-4</sup>  |
| 635       | Octad  | 3     | 1(1, 0F <sub>1</sub> ) | 0011F <sub>1</sub> | 0011F <sub>2</sub> | 1.317(22) × 10 <sup>-1</sup>  |
| 636       | Octad  | 4     | 2(2, 0E)               | 0011F <sub>1</sub> | 0011F <sub>2</sub> | -1.047(16) × 10 <sup>-2</sup> |
| 637       | Octad  | 4     | 2(2, 0F <sub>2</sub> ) | 0011F <sub>1</sub> | 0011F <sub>2</sub> | -6.80(30) × 10 <sup>-3</sup>  |
| 638       | Octad  | 5     | 3(1, 0F <sub>1</sub> ) | 0011F <sub>1</sub> | 0011F <sub>2</sub> | 1.009(11) × 10 <sup>-3</sup>  |
| 639       | Octad  | 5     | 3(3, 0A <sub>2</sub> ) | 0011F <sub>1</sub> | 0011F <sub>2</sub> | -3.087(75) × 10 <sup>-4</sup> |
| 640       | Octad  | 5     | 3(3, 0F <sub>1</sub> ) | 0011F <sub>1</sub> | 0011F <sub>2</sub> | 6.87(11) × 10 <sup>-4</sup>   |

Table I (continued).

| Parameter | Polyad | Order | $\Omega(K, nC)$        | $\{s\}$ $C_1$      | $\{s'\}$ $C_2$     | Value / $\text{cm}^{-1}$      |
|-----------|--------|-------|------------------------|--------------------|--------------------|-------------------------------|
| 641       | Octad  | 5     | 3(3, 0F <sub>2</sub> ) | 0011F <sub>1</sub> | 0011F <sub>2</sub> | -2.97(12) × 10 <sup>-4</sup>  |
| 642       | Octad  | 2     | 0(0, 0A <sub>1</sub> ) | 0011F <sub>2</sub> | 0011F <sub>2</sub> | -12.084(21)                   |
| 643       | Octad  | 3     | 1(1, 0F <sub>1</sub> ) | 0011F <sub>2</sub> | 0011F <sub>2</sub> | 9.114(39) × 10 <sup>-1</sup>  |
| 644       | Octad  | 4     | 2(0, 0A <sub>1</sub> ) | 0011F <sub>2</sub> | 0011F <sub>2</sub> | -4.112(39) × 10 <sup>-2</sup> |
| 645       | Octad  | 4     | 2(2, 0E)               | 0011F <sub>2</sub> | 0011F <sub>2</sub> | 3.821(45) × 10 <sup>-2</sup>  |
| 646       | Octad  | 4     | 2(2, 0F <sub>2</sub> ) | 0011F <sub>2</sub> | 0011F <sub>2</sub> | -6.428(56) × 10 <sup>-2</sup> |
| 647       | Octad  | 5     | 3(1, 0F <sub>1</sub> ) | 0011F <sub>2</sub> | 0011F <sub>2</sub> | 4.27(15) × 10 <sup>-4</sup>   |
| 648       | Octad  | 5     | 3(3, 0F <sub>1</sub> ) | 0011F <sub>2</sub> | 0011F <sub>2</sub> | 6.40(12) × 10 <sup>-4</sup>   |
| 649       | Octad  | 5     | 2(2, 0E)               | 0011A <sub>1</sub> | 0300E              | 0.0                           |
| 650       | Octad  | 3     | 0(0, 0A <sub>1</sub> ) | 0011A <sub>1</sub> | 0300A <sub>1</sub> | 1.51(24)                      |
| 651       | Octad  | 5     | 2(0, 0A <sub>1</sub> ) | 0011A <sub>1</sub> | 0300A <sub>1</sub> | -1.059(49) × 10 <sup>-2</sup> |
| 652       | Octad  | 3     | 0(0, 0A <sub>1</sub> ) | 0011E              | 0300E              | 0.0                           |
| 653       | Octad  | 5     | 2(0, 0A <sub>1</sub> ) | 0011E              | 0300E              | -7.09(52) × 10 <sup>-3</sup>  |
| 654       | Octad  | 5     | 2(2, 0E)               | 0011E              | 0300E              | 1.375(54) × 10 <sup>-2</sup>  |
| 655       | Octad  | 5     | 2(2, 0E)               | 0011E              | 0300A <sub>1</sub> | -2.527(37) × 10 <sup>-2</sup> |
| 656       | Octad  | 5     | 2(2, 0E)               | 0011E              | 0300A <sub>2</sub> | -7.36(36) × 10 <sup>-3</sup>  |
| 657       | Octad  | 4     | 1(1, 0F <sub>1</sub> ) | 0011F <sub>1</sub> | 0300E              | -1.468(17)                    |
| 658       | Octad  | 5     | 2(2, 0F <sub>2</sub> ) | 0011F <sub>1</sub> | 0300E              | 1.01(47) × 10 <sup>-3</sup>   |
| 659       | Octad  | 4     | 1(1, 0F <sub>1</sub> ) | 0011F <sub>1</sub> | 0300A <sub>1</sub> | 0.0                           |
| 660       | Octad  | 5     | 2(2, 0F <sub>2</sub> ) | 0011F <sub>1</sub> | 0300A <sub>2</sub> | 1.277(51) × 10 <sup>-2</sup>  |
| 661       | Octad  | 4     | 1(1, 0F <sub>1</sub> ) | 0011F <sub>2</sub> | 0300E              | 7.86(24) × 10 <sup>-1</sup>   |
| 662       | Octad  | 5     | 2(2, 0F <sub>2</sub> ) | 0011F <sub>2</sub> | 0300E              | 3.733(43) × 10 <sup>-2</sup>  |
| 663       | Octad  | 5     | 2(2, 0F <sub>2</sub> ) | 0011F <sub>2</sub> | 0300A <sub>1</sub> | 1.243(47) × 10 <sup>-2</sup>  |
| 664       | Octad  | 4     | 1(1, 0F <sub>1</sub> ) | 0011F <sub>2</sub> | 0300A <sub>2</sub> | 3.45(17) × 10 <sup>-1</sup>   |
| 665       | Octad  | 5     | 2(2, 0F <sub>2</sub> ) | 0011A <sub>1</sub> | 0201F <sub>2</sub> | 4.38(33) × 10 <sup>-3</sup>   |
| 666       | Octad  | 4     | 1(1, 0F <sub>1</sub> ) | 0011A <sub>1</sub> | 0201F <sub>1</sub> | 1.51(12) × 10 <sup>-1</sup>   |
| 667       | Octad  | 5     | 2(2, 0F <sub>2</sub> ) | 0011A <sub>1</sub> | 0201F <sub>2</sub> | 7.62(34) × 10 <sup>-3</sup>   |
| 668       | Octad  | 4     | 1(1, 0F <sub>1</sub> ) | 0011E              | 0201F <sub>2</sub> | 0.0                           |
| 669       | Octad  | 5     | 2(2, 0F <sub>2</sub> ) | 0011E              | 0201F <sub>2</sub> | 3.256(45) × 10 <sup>-2</sup>  |
| 670       | Octad  | 4     | 1(1, 0F <sub>1</sub> ) | 0011E              | 0201F <sub>1</sub> | -2.685(73) × 10 <sup>-1</sup> |
| 671       | Octad  | 5     | 2(2, 0F <sub>2</sub> ) | 0011E              | 0201F <sub>1</sub> | 2.056(28) × 10 <sup>-2</sup>  |
| 672       | Octad  | 4     | 1(1, 0F <sub>1</sub> ) | 0011E              | 0201F <sub>2</sub> | -6.30(71) × 10 <sup>-2</sup>  |
| 673       | Octad  | 5     | 2(2, 0F <sub>2</sub> ) | 0011E              | 0201F <sub>2</sub> | 0.0                           |
| 674       | Octad  | 4     | 1(1, 0F <sub>1</sub> ) | 0011F <sub>1</sub> | 0201F <sub>2</sub> | 0.0                           |
| 675       | Octad  | 5     | 2(2, 0E)               | 0011F <sub>1</sub> | 0201F <sub>2</sub> | 0.0                           |
| 676       | Octad  | 5     | 2(2, 0F <sub>2</sub> ) | 0011F <sub>1</sub> | 0201F <sub>2</sub> | -7.57(50) × 10 <sup>-3</sup>  |
| 677       | Octad  | 3     | 0(0, 0A <sub>1</sub> ) | 0011F <sub>1</sub> | 0201F <sub>1</sub> | 0.0                           |
| 678       | Octad  | 4     | 1(1, 0F <sub>1</sub> ) | 0011F <sub>1</sub> | 0201F <sub>1</sub> | -4.693(43) × 10 <sup>-1</sup> |
| 679       | Octad  | 5     | 2(0, 0A <sub>1</sub> ) | 0011F <sub>1</sub> | 0201F <sub>1</sub> | -2.00(30) × 10 <sup>-3</sup>  |
| 680       | Octad  | 5     | 2(2, 0E)               | 0011F <sub>1</sub> | 0201F <sub>1</sub> | -6.61(30) × 10 <sup>-3</sup>  |
| 681       | Octad  | 5     | 2(2, 0F <sub>2</sub> ) | 0011F <sub>1</sub> | 0201F <sub>1</sub> | 0.0                           |
| 682       | Octad  | 4     | 1(1, 0F <sub>1</sub> ) | 0011F <sub>1</sub> | 0201F <sub>2</sub> | -5.397(69) × 10 <sup>-1</sup> |
| 683       | Octad  | 5     | 2(2, 0E)               | 0011F <sub>1</sub> | 0201F <sub>2</sub> | -1.488(27) × 10 <sup>-2</sup> |
| 684       | Octad  | 5     | 2(2, 0F <sub>2</sub> ) | 0011F <sub>1</sub> | 0201F <sub>2</sub> | -1.551(40) × 10 <sup>-2</sup> |
| 685       | Octad  | 3     | 0(0, 0A <sub>1</sub> ) | 0011F <sub>2</sub> | 0201F <sub>2</sub> | 4.982(48)                     |
| 686       | Octad  | 4     | 1(1, 0F <sub>1</sub> ) | 0011F <sub>2</sub> | 0201F <sub>2</sub> | -1.559(11)                    |
| 687       | Octad  | 5     | 2(0, 0A <sub>1</sub> ) | 0011F <sub>2</sub> | 0201F <sub>2</sub> | -1.441(31) × 10 <sup>-2</sup> |
| 688       | Octad  | 5     | 2(2, 0E)               | 0011F <sub>2</sub> | 0201F <sub>2</sub> | -5.16(43) × 10 <sup>-3</sup>  |
| 689       | Octad  | 5     | 2(2, 0F <sub>2</sub> ) | 0011F <sub>2</sub> | 0201F <sub>2</sub> | 2.718(38) × 10 <sup>-2</sup>  |
| 690       | Octad  | 4     | 1(1, 0F <sub>1</sub> ) | 0011F <sub>2</sub> | 0201F <sub>1</sub> | -1.996(65) × 10 <sup>-1</sup> |
| 691       | Octad  | 5     | 2(2, 0E)               | 0011F <sub>2</sub> | 0201F <sub>1</sub> | -1.066(31) × 10 <sup>-2</sup> |
| 692       | Octad  | 5     | 2(2, 0F <sub>2</sub> ) | 0011F <sub>2</sub> | 0201F <sub>1</sub> | 4.42(37) × 10 <sup>-3</sup>   |
| 693       | Octad  | 3     | 0(0, 0A <sub>1</sub> ) | 0011F <sub>2</sub> | 0201F <sub>2</sub> | -7.97(27) × 10 <sup>-1</sup>  |
| 694       | Octad  | 4     | 1(1, 0F <sub>1</sub> ) | 0011F <sub>2</sub> | 0201F <sub>2</sub> | -4.09(39) × 10 <sup>-2</sup>  |
| 695       | Octad  | 5     | 2(0, 0A <sub>1</sub> ) | 0011F <sub>2</sub> | 0201F <sub>2</sub> | 3.91(26) × 10 <sup>-3</sup>   |
| 696       | Octad  | 5     | 2(2, 0E)               | 0011F <sub>2</sub> | 0201F <sub>2</sub> | -4.91(41) × 10 <sup>-3</sup>  |
| 697       | Octad  | 5     | 2(2, 0F <sub>2</sub> ) | 0011F <sub>2</sub> | 0201F <sub>2</sub> | 0.0                           |
| 698       | Octad  | 5     | 2(2, 0E)               | 0011A <sub>1</sub> | 0102E              | 0.0                           |
| 699       | Octad  | 3     | 0(0, 0A <sub>1</sub> ) | 0011A <sub>1</sub> | 0102A <sub>1</sub> | 0.0                           |
| 700       | Octad  | 5     | 2(0, 0A <sub>1</sub> ) | 0011A <sub>1</sub> | 0102A <sub>1</sub> | 0.0                           |
| 701       | Octad  | 5     | 2(2, 0E)               | 0011A <sub>1</sub> | 0102E              | -1.143(32) × 10 <sup>-2</sup> |
| 702       | Octad  | 4     | 1(1, 0F <sub>1</sub> ) | 0011A <sub>1</sub> | 0102F <sub>1</sub> | -1.01(12) × 10 <sup>-1</sup>  |
| 703       | Octad  | 5     | 2(2, 0F <sub>2</sub> ) | 0011A <sub>1</sub> | 0102F <sub>2</sub> | -2.676(47) × 10 <sup>-2</sup> |
| 704       | Octad  | 3     | 0(0, 0A <sub>1</sub> ) | 0011E              | 0102E              | 1.01(14)                      |
| 705       | Octad  | 5     | 2(0, 0A <sub>1</sub> ) | 0011E              | 0102E              | -3.68(48) × 10 <sup>-3</sup>  |
| 706       | Octad  | 5     | 2(2, 0E)               | 0011E              | 0102E              | 1.598(44) × 10 <sup>-2</sup>  |
| 707       | Octad  | 5     | 2(2, 0E)               | 0011E              | 0102A <sub>1</sub> | 1.285(33) × 10 <sup>-2</sup>  |
| 708       | Octad  | 5     | 2(2, 0E)               | 0011E              | 0102A <sub>2</sub> | 1.082(42) × 10 <sup>-2</sup>  |
| 709       | Octad  | 3     | 0(0, 0A <sub>1</sub> ) | 0011E              | 0102E              | -6.153(79)                    |
| 710       | Octad  | 5     | 2(0, 0A <sub>1</sub> ) | 0011E              | 0102E              | -1.370(43) × 10 <sup>-2</sup> |
| 711       | Octad  | 5     | 2(2, 0E)               | 0011E              | 0102E              | -8.01(35) × 10 <sup>-3</sup>  |
| 712       | Octad  | 4     | 1(1, 0F <sub>1</sub> ) | 0011E              | 0102F <sub>1</sub> | 0.0                           |
| 713       | Octad  | 5     | 2(2, 0F <sub>2</sub> ) | 0011E              | 0102F <sub>1</sub> | 0.0                           |
| 714       | Octad  | 4     | 1(1, 0F <sub>1</sub> ) | 0011E              | 0102F <sub>2</sub> | 0.0                           |
| 715       | Octad  | 5     | 2(2, 0F <sub>2</sub> ) | 0011E              | 0102F <sub>2</sub> | 3.628(60) × 10 <sup>-2</sup>  |
| 716       | Octad  | 4     | 1(1, 0F <sub>1</sub> ) | 0011F <sub>1</sub> | 0102E              | 2.96(17) × 10 <sup>-1</sup>   |
| 717       | Octad  | 5     | 2(2, 0F <sub>2</sub> ) | 0011F <sub>1</sub> | 0102E              | 0.0                           |
| 718       | Octad  | 4     | 1(1, 0F <sub>1</sub> ) | 0011F <sub>1</sub> | 0102A <sub>1</sub> | 1.198(96) × 10 <sup>-1</sup>  |
| 719       | Octad  | 5     | 2(2, 0F <sub>2</sub> ) | 0011F <sub>1</sub> | 0102A <sub>2</sub> | 1.493(42) × 10 <sup>-2</sup>  |
| 720       | Octad  | 4     | 1(1, 0F <sub>1</sub> ) | 0011F <sub>1</sub> | 0102E              | -8.5(1.3) × 10 <sup>-2</sup>  |

Table I (continued).

| Parameter | Polyad | Order | $\Omega(K, nC)$        | $\{s\}$ $C_1$      | $\{s'\}$ $C_2$     | Value / $\text{cm}^{-1}$      |
|-----------|--------|-------|------------------------|--------------------|--------------------|-------------------------------|
| 721       | Octad  | 5     | 2(2, 0F <sub>2</sub> ) | 0011F <sub>1</sub> | 0102E              | -6.46(42) × 10 <sup>-3</sup>  |
| 722       | Octad  | 3     | 0(0, 0A <sub>1</sub> ) | 0011F <sub>1</sub> | 0102F <sub>1</sub> | 2.332(70)                     |
| 723       | Octad  | 4     | 1(1, 0F <sub>1</sub> ) | 0011F <sub>1</sub> | 0102F <sub>1</sub> | -3.27(11) × 10 <sup>-1</sup>  |
| 724       | Octad  | 5     | 2(0, 0A <sub>1</sub> ) | 0011F <sub>1</sub> | 0102F <sub>1</sub> | -2.63(32) × 10 <sup>-3</sup>  |
| 725       | Octad  | 5     | 2(2, 0E )              | 0011F <sub>1</sub> | 0102F <sub>1</sub> | 1.253(33) × 10 <sup>-2</sup>  |
| 726       | Octad  | 5     | 2(2, 0F <sub>2</sub> ) | 0011F <sub>1</sub> | 0102F <sub>1</sub> | 2.52(46) × 10 <sup>-3</sup>   |
| 727       | Octad  | 4     | 1(1, 0F <sub>1</sub> ) | 0011F <sub>1</sub> | 0102F <sub>2</sub> | 0.0                           |
| 728       | Octad  | 5     | 2(2, 0E )              | 0011F <sub>1</sub> | 0102F <sub>2</sub> | 5.19(40) × 10 <sup>-3</sup>   |
| 729       | Octad  | 5     | 2(2, 0F <sub>2</sub> ) | 0011F <sub>1</sub> | 0102F <sub>2</sub> | -1.856(38) × 10 <sup>-2</sup> |
| 730       | Octad  | 4     | 1(1, 0F <sub>1</sub> ) | 0011F <sub>2</sub> | 0102E              | -3.10(16) × 10 <sup>-1</sup>  |
| 731       | Octad  | 5     | 2(2, 0F <sub>2</sub> ) | 0011F <sub>2</sub> | 0102E              | -2.045(44) × 10 <sup>-2</sup> |
| 732       | Octad  | 5     | 2(2, 0F <sub>2</sub> ) | 0011F <sub>2</sub> | 0102A <sub>1</sub> | 1.959(44) × 10 <sup>-2</sup>  |
| 733       | Octad  | 4     | 1(1, 0F <sub>1</sub> ) | 0011F <sub>2</sub> | 0102A <sub>2</sub> | 0.0                           |
| 734       | Octad  | 4     | 1(1, 0F <sub>1</sub> ) | 0011F <sub>2</sub> | 0102E              | 0.0                           |
| 735       | Octad  | 5     | 2(2, 0F <sub>2</sub> ) | 0011F <sub>2</sub> | 0102E              | -1.598(48) × 10 <sup>-2</sup> |
| 736       | Octad  | 4     | 1(1, 0F <sub>1</sub> ) | 0011F <sub>2</sub> | 0102F <sub>1</sub> | -1.35(14) × 10 <sup>-1</sup>  |
| 737       | Octad  | 5     | 2(2, 0E )              | 0011F <sub>2</sub> | 0102F <sub>1</sub> | -1.76(33) × 10 <sup>-3</sup>  |
| 738       | Octad  | 5     | 2(2, 0F <sub>2</sub> ) | 0011F <sub>2</sub> | 0102F <sub>1</sub> | -2.47(36) × 10 <sup>-3</sup>  |
| 739       | Octad  | 3     | 0(0, 0A <sub>1</sub> ) | 0011F <sub>2</sub> | 0102F <sub>2</sub> | 0.0                           |
| 740       | Octad  | 4     | 1(1, 0F <sub>1</sub> ) | 0011F <sub>2</sub> | 0102F <sub>2</sub> | -8.87(16) × 10 <sup>-1</sup>  |
| 741       | Octad  | 5     | 2(0, 0A <sub>1</sub> ) | 0011F <sub>2</sub> | 0102F <sub>2</sub> | 1.106(32) × 10 <sup>-2</sup>  |
| 742       | Octad  | 5     | 2(2, 0E )              | 0011F <sub>2</sub> | 0102F <sub>2</sub> | -2.956(30) × 10 <sup>-2</sup> |
| 743       | Octad  | 5     | 2(2, 0F <sub>2</sub> ) | 0011F <sub>2</sub> | 0102F <sub>2</sub> | 4.45(40) × 10 <sup>-3</sup>   |
| 744       | Octad  | 5     | 2(2, 0F <sub>2</sub> ) | 0011A <sub>1</sub> | 0003F <sub>2</sub> | -8.72(65) × 10 <sup>-3</sup>  |
| 745       | Octad  | 3     | 0(0, 0A <sub>1</sub> ) | 0011A <sub>1</sub> | 0003A <sub>1</sub> | 3.96(24)                      |
| 746       | Octad  | 5     | 2(0, 0A <sub>1</sub> ) | 0011A <sub>1</sub> | 0003A <sub>1</sub> | -1.281(44) × 10 <sup>-2</sup> |
| 747       | Octad  | 4     | 1(1, 0F <sub>1</sub> ) | 0011A <sub>1</sub> | 0003F <sub>1</sub> | 0.0                           |
| 748       | Octad  | 5     | 2(2, 0F <sub>2</sub> ) | 0011A <sub>1</sub> | 0003F <sub>2</sub> | 1.97(54) × 10 <sup>-3</sup>   |
| 749       | Octad  | 4     | 1(1, 0F <sub>1</sub> ) | 0011E              | 0003F <sub>2</sub> | 7.19(26) × 10 <sup>-1</sup>   |
| 750       | Octad  | 5     | 2(2, 0F <sub>2</sub> ) | 0011E              | 0003F <sub>2</sub> | -2.574(82) × 10 <sup>-2</sup> |
| 751       | Octad  | 5     | 2(2, 0E )              | 0011E              | 0003A <sub>1</sub> | 0.0                           |
| 752       | Octad  | 4     | 1(1, 0F <sub>1</sub> ) | 0011E              | 0003F <sub>1</sub> | 0.0                           |
| 753       | Octad  | 5     | 2(2, 0F <sub>2</sub> ) | 0011E              | 0003F <sub>1</sub> | -3.464(58) × 10 <sup>-2</sup> |
| 754       | Octad  | 4     | 1(1, 0F <sub>1</sub> ) | 0011E              | 0003F <sub>2</sub> | -8.76(23) × 10 <sup>-1</sup>  |
| 755       | Octad  | 5     | 2(2, 0F <sub>2</sub> ) | 0011E              | 0003F <sub>2</sub> | -3.71(67) × 10 <sup>-3</sup>  |
| 756       | Octad  | 4     | 1(1, 0F <sub>1</sub> ) | 0011F <sub>1</sub> | 0003F <sub>2</sub> | 9.45(23) × 10 <sup>-1</sup>   |
| 757       | Octad  | 5     | 2(2, 0E )              | 0011F <sub>1</sub> | 0003F <sub>2</sub> | 0.0                           |
| 758       | Octad  | 5     | 2(2, 0F <sub>2</sub> ) | 0011F <sub>1</sub> | 0003F <sub>2</sub> | 0.0                           |
| 759       | Octad  | 4     | 1(1, 0F <sub>1</sub> ) | 0011F <sub>1</sub> | 0003A <sub>1</sub> | 2.06(18) × 10 <sup>-1</sup>   |
| 760       | Octad  | 3     | 0(0, 0A <sub>1</sub> ) | 0011F <sub>1</sub> | 0003F <sub>1</sub> | -1.638(91)                    |
| 761       | Octad  | 4     | 1(1, 0F <sub>1</sub> ) | 0011F <sub>1</sub> | 0003F <sub>1</sub> | 0.0                           |
| 762       | Octad  | 5     | 2(0, 0A <sub>1</sub> ) | 0011F <sub>1</sub> | 0003F <sub>1</sub> | 0.0                           |
| 763       | Octad  | 5     | 2(2, 0E )              | 0011F <sub>1</sub> | 0003F <sub>1</sub> | 0.0                           |
| 764       | Octad  | 5     | 2(2, 0F <sub>2</sub> ) | 0011F <sub>1</sub> | 0003F <sub>1</sub> | 5.33(42) × 10 <sup>-3</sup>   |
| 765       | Octad  | 4     | 1(1, 0F <sub>1</sub> ) | 0011F <sub>1</sub> | 0003F <sub>2</sub> | 0.0                           |
| 766       | Octad  | 5     | 2(2, 0E )              | 0011F <sub>1</sub> | 0003F <sub>2</sub> | 6.41(35) × 10 <sup>-3</sup>   |
| 767       | Octad  | 5     | 2(2, 0F <sub>2</sub> ) | 0011F <sub>1</sub> | 0003F <sub>2</sub> | 1.002(51) × 10 <sup>-2</sup>  |
| 768       | Octad  | 3     | 0(0, 0A <sub>1</sub> ) | 0011F <sub>2</sub> | 0003F <sub>2</sub> | -1.88(16)                     |
| 769       | Octad  | 4     | 1(1, 0F <sub>1</sub> ) | 0011F <sub>2</sub> | 0003F <sub>2</sub> | 2.91(23) × 10 <sup>-1</sup>   |
| 770       | Octad  | 5     | 2(0, 0A <sub>1</sub> ) | 0011F <sub>2</sub> | 0003F <sub>2</sub> | 1.690(36) × 10 <sup>-2</sup>  |
| 771       | Octad  | 5     | 2(2, 0E )              | 0011F <sub>2</sub> | 0003F <sub>2</sub> | 0.0                           |
| 772       | Octad  | 5     | 2(2, 0F <sub>2</sub> ) | 0011F <sub>2</sub> | 0003F <sub>2</sub> | -4.58(52) × 10 <sup>-3</sup>  |
| 773       | Octad  | 5     | 2(2, 0F <sub>2</sub> ) | 0011F <sub>2</sub> | 0003A <sub>1</sub> | 0.0                           |
| 774       | Octad  | 4     | 1(1, 0F <sub>1</sub> ) | 0011F <sub>2</sub> | 0003F <sub>1</sub> | 0.0                           |
| 775       | Octad  | 5     | 2(2, 0E )              | 0011F <sub>2</sub> | 0003F <sub>1</sub> | 1.302(43) × 10 <sup>-2</sup>  |
| 776       | Octad  | 5     | 2(2, 0F <sub>2</sub> ) | 0011F <sub>2</sub> | 0003F <sub>1</sub> | 3.24(48) × 10 <sup>-3</sup>   |
| 777       | Octad  | 3     | 0(0, 0A <sub>1</sub> ) | 0011F <sub>2</sub> | 0003F <sub>2</sub> | -4.81(45) × 10 <sup>-1</sup>  |
| 778       | Octad  | 4     | 1(1, 0F <sub>1</sub> ) | 0011F <sub>2</sub> | 0003F <sub>2</sub> | -5.0(2.0) × 10 <sup>-2</sup>  |
| 779       | Octad  | 5     | 2(0, 0A <sub>1</sub> ) | 0011F <sub>2</sub> | 0003F <sub>2</sub> | -2.50(34) × 10 <sup>-3</sup>  |
| 780       | Octad  | 5     | 2(2, 0E )              | 0011F <sub>2</sub> | 0003F <sub>2</sub> | 2.91(39) × 10 <sup>-3</sup>   |
| 781       | Octad  | 5     | 2(2, 0F <sub>2</sub> ) | 0011F <sub>2</sub> | 0003F <sub>2</sub> | 5.57(43) × 10 <sup>-3</sup>   |
| 782       | Octad  | 4     | 0(0, 0A <sub>1</sub> ) | 0300E              | 0300E              | 1.074(42)                     |
| 783       | Octad  | 4     | 0(0, 0A <sub>1</sub> ) | 0300A <sub>1</sub> | 0300A <sub>1</sub> | 1.289(46) × 10 <sup>-1</sup>  |
| 784       | Octad  | 4     | 0(0, 0A <sub>1</sub> ) | 0300A <sub>2</sub> | 0300A <sub>2</sub> | -1.417(12) × 10 <sup>-1</sup> |
| 785       | Octad  | 5     | 1(1, 0F <sub>1</sub> ) | 0300E              | 0201F <sub>2</sub> | 0.0                           |
| 786       | Octad  | 5     | 1(1, 0F <sub>1</sub> ) | 0300E              | 0201F <sub>1</sub> | 0.0                           |
| 787       | Octad  | 5     | 1(1, 0F <sub>1</sub> ) | 0300E              | 0201F <sub>2</sub> | 1.965(63) × 10 <sup>-1</sup>  |
| 788       | Octad  | 5     | 1(1, 0F <sub>1</sub> ) | 0300A <sub>1</sub> | 0201F <sub>1</sub> | 0.0                           |
| 789       | Octad  | 5     | 1(1, 0F <sub>1</sub> ) | 0300A <sub>2</sub> | 0201F <sub>2</sub> | 0.0                           |
| 790       | Octad  | 5     | 1(1, 0F <sub>1</sub> ) | 0300A <sub>2</sub> | 0201F <sub>2</sub> | -5.70(19) × 10 <sup>-2</sup>  |
| 791       | Octad  | 4     | 0(0, 0A <sub>1</sub> ) | 0300E              | 0102E              | 4.24(13)                      |
| 792       | Octad  | 4     | 0(0, 0A <sub>1</sub> ) | 0300E              | 0102E              | -2.29(10)                     |
| 793       | Octad  | 5     | 1(1, 0F <sub>1</sub> ) | 0300E              | 0102F <sub>1</sub> | 3.864(64) × 10 <sup>-1</sup>  |
| 794       | Octad  | 5     | 1(1, 0F <sub>1</sub> ) | 0300E              | 0102F <sub>2</sub> | -1.168(67) × 10 <sup>-1</sup> |
| 795       | Octad  | 4     | 0(0, 0A <sub>1</sub> ) | 0300A <sub>1</sub> | 0102A <sub>1</sub> | 2.483(95)                     |
| 796       | Octad  | 5     | 1(1, 0F <sub>1</sub> ) | 0300A <sub>1</sub> | 0102F <sub>1</sub> | 0.0                           |
| 797       | Octad  | 4     | 0(0, 0A <sub>1</sub> ) | 0300A <sub>2</sub> | 0102A <sub>2</sub> | 0.0                           |
| 798       | Octad  | 5     | 1(1, 0F <sub>1</sub> ) | 0300A <sub>2</sub> | 0102F <sub>2</sub> | 1.614(54) × 10 <sup>-1</sup>  |
| 799       | Octad  | 5     | 1(1, 0F <sub>1</sub> ) | 0300E              | 0003F <sub>2</sub> | 3.34(13) × 10 <sup>-1</sup>   |
| 800       | Octad  | 5     | 1(1, 0F <sub>1</sub> ) | 0300E              | 0003F <sub>1</sub> | 0.0                           |

Table I (continued).

| Parameter | Polyad | Order | $\Omega(K, nC)$        | $\{s\}$ $C_1$      | $\{s'\}$ $C_2$     | Value / $\text{cm}^{-1}$      |
|-----------|--------|-------|------------------------|--------------------|--------------------|-------------------------------|
| 801       | Octad  | 5     | 1(1, 0F <sub>1</sub> ) | 0300E              | 0003F <sub>2</sub> | -3.684(97) × 10 <sup>-1</sup> |
| 802       | Octad  | 4     | 0(0, 0A <sub>1</sub> ) | 0300A <sub>1</sub> | 0003A <sub>1</sub> | 0.0                           |
| 803       | Octad  | 5     | 1(1, 0F <sub>1</sub> ) | 0300A <sub>1</sub> | 0003F <sub>1</sub> | -1.65(11) × 10 <sup>-1</sup>  |
| 804       | Octad  | 5     | 1(1, 0F <sub>1</sub> ) | 0300A <sub>2</sub> | 0003F <sub>2</sub> | -2.33(17) × 10 <sup>-1</sup>  |
| 805       | Octad  | 5     | 1(1, 0F <sub>1</sub> ) | 0300A <sub>2</sub> | 0003F <sub>2</sub> | 0.0                           |
| 806       | Octad  | 4     | 0(0, 0A <sub>1</sub> ) | 0201F <sub>2</sub> | 0201F <sub>2</sub> | 2.168(41)                     |
| 807       | Octad  | 5     | 1(1, 0F <sub>1</sub> ) | 0201F <sub>2</sub> | 0201F <sub>2</sub> | -2.566(75) × 10 <sup>-1</sup> |
| 808       | Octad  | 5     | 1(1, 0F <sub>1</sub> ) | 0201F <sub>2</sub> | 0201F <sub>1</sub> | 1.430(41) × 10 <sup>-1</sup>  |
| 809       | Octad  | 4     | 0(0, 0A <sub>1</sub> ) | 0201F <sub>2</sub> | 0201F <sub>2</sub> | -3.835(68) × 10 <sup>-1</sup> |
| 810       | Octad  | 5     | 1(1, 0F <sub>1</sub> ) | 0201F <sub>2</sub> | 0201F <sub>2</sub> | 3.116(51) × 10 <sup>-1</sup>  |
| 811       | Octad  | 4     | 0(0, 0A <sub>1</sub> ) | 0201F <sub>1</sub> | 0201F <sub>1</sub> | -3.553(41) × 10 <sup>-1</sup> |
| 812       | Octad  | 5     | 1(1, 0F <sub>1</sub> ) | 0201F <sub>1</sub> | 0201F <sub>1</sub> | 0.0                           |
| 813       | Octad  | 5     | 1(1, 0F <sub>1</sub> ) | 0201F <sub>1</sub> | 0201F <sub>2</sub> | 0.0                           |
| 814       | Octad  | 4     | 0(0, 0A <sub>1</sub> ) | 0201F <sub>2</sub> | 0201F <sub>2</sub> | -2.940(98) × 10 <sup>-1</sup> |
| 815       | Octad  | 5     | 1(1, 0F <sub>1</sub> ) | 0201F <sub>2</sub> | 0201F <sub>2</sub> | -2.38(21) × 10 <sup>-2</sup>  |
| 816       | Octad  | 5     | 1(1, 0F <sub>1</sub> ) | 0201F <sub>2</sub> | 0102E              | -1.05(65) × 10 <sup>-2</sup>  |
| 817       | Octad  | 5     | 1(1, 0F <sub>1</sub> ) | 0201F <sub>2</sub> | 0102A <sub>2</sub> | -1.277(30) × 10 <sup>-1</sup> |
| 818       | Octad  | 5     | 1(1, 0F <sub>1</sub> ) | 0201F <sub>2</sub> | 0102E              | 1.856(59) × 10 <sup>-1</sup>  |
| 819       | Octad  | 5     | 1(1, 0F <sub>1</sub> ) | 0201F <sub>2</sub> | 0102F <sub>1</sub> | 0.0                           |
| 820       | Octad  | 4     | 0(0, 0A <sub>1</sub> ) | 0201F <sub>2</sub> | 0102F <sub>2</sub> | -3.77(30) × 10 <sup>-1</sup>  |
| 821       | Octad  | 5     | 1(1, 0F <sub>1</sub> ) | 0201F <sub>2</sub> | 0102F <sub>2</sub> | 0.0                           |
| 822       | Octad  | 5     | 1(1, 0F <sub>1</sub> ) | 0201F <sub>1</sub> | 0102E              | 3.19(40) × 10 <sup>-2</sup>   |
| 823       | Octad  | 5     | 1(1, 0F <sub>1</sub> ) | 0201F <sub>1</sub> | 0102A <sub>1</sub> | 1.029(37) × 10 <sup>-1</sup>  |
| 824       | Octad  | 5     | 1(1, 0F <sub>1</sub> ) | 0201F <sub>1</sub> | 0102E              | 0.0                           |
| 825       | Octad  | 4     | 0(0, 0A <sub>1</sub> ) | 0201F <sub>1</sub> | 0102F <sub>1</sub> | 1.255(45)                     |
| 826       | Octad  | 5     | 1(1, 0F <sub>1</sub> ) | 0201F <sub>1</sub> | 0102F <sub>1</sub> | 3.58(36) × 10 <sup>-2</sup>   |
| 827       | Octad  | 5     | 1(1, 0F <sub>1</sub> ) | 0201F <sub>1</sub> | 0102F <sub>2</sub> | -2.43(44) × 10 <sup>-2</sup>  |
| 828       | Octad  | 5     | 1(1, 0F <sub>1</sub> ) | 0201F <sub>2</sub> | 0102E              | 1.782(53) × 10 <sup>-1</sup>  |
| 829       | Octad  | 5     | 1(1, 0F <sub>1</sub> ) | 0201F <sub>2</sub> | 0102A <sub>2</sub> | -8.5(3.3) × 10 <sup>-3</sup>  |
| 830       | Octad  | 5     | 1(1, 0F <sub>1</sub> ) | 0201F <sub>2</sub> | 0102E              | 0.0                           |
| 831       | Octad  | 5     | 1(1, 0F <sub>1</sub> ) | 0201F <sub>2</sub> | 0102F <sub>1</sub> | 8.07(46) × 10 <sup>-2</sup>   |
| 832       | Octad  | 4     | 0(0, 0A <sub>1</sub> ) | 0201F <sub>2</sub> | 0102F <sub>2</sub> | 1.219(44)                     |
| 833       | Octad  | 5     | 1(1, 0F <sub>1</sub> ) | 0201F <sub>2</sub> | 0102F <sub>2</sub> | -9.03(37) × 10 <sup>-2</sup>  |
| 834       | Octad  | 4     | 0(0, 0A <sub>1</sub> ) | 0201F <sub>2</sub> | 0003F <sub>2</sub> | 0.0                           |
| 835       | Octad  | 5     | 1(1, 0F <sub>1</sub> ) | 0201F <sub>2</sub> | 0003F <sub>2</sub> | 0.0                           |
| 836       | Octad  | 5     | 1(1, 0F <sub>1</sub> ) | 0201F <sub>2</sub> | 0003F <sub>1</sub> | -1.681(54) × 10 <sup>-1</sup> |
| 837       | Octad  | 4     | 0(0, 0A <sub>1</sub> ) | 0201F <sub>2</sub> | 0003F <sub>2</sub> | 1.123(68)                     |
| 838       | Octad  | 5     | 1(1, 0F <sub>1</sub> ) | 0201F <sub>2</sub> | 0003F <sub>2</sub> | 0.0                           |
| 839       | Octad  | 5     | 1(1, 0F <sub>1</sub> ) | 0201F <sub>1</sub> | 0003F <sub>2</sub> | 0.0                           |
| 840       | Octad  | 5     | 1(1, 0F <sub>1</sub> ) | 0201F <sub>1</sub> | 0003A <sub>1</sub> | -2.554(52) × 10 <sup>-1</sup> |
| 841       | Octad  | 4     | 0(0, 0A <sub>1</sub> ) | 0201F <sub>1</sub> | 0003F <sub>1</sub> | 0.0                           |
| 842       | Octad  | 5     | 1(1, 0F <sub>1</sub> ) | 0201F <sub>1</sub> | 0003F <sub>1</sub> | -1.154(63) × 10 <sup>-1</sup> |
| 843       | Octad  | 5     | 1(1, 0F <sub>1</sub> ) | 0201F <sub>1</sub> | 0003F <sub>2</sub> | -2.00(54) × 10 <sup>-2</sup>  |
| 844       | Octad  | 4     | 0(0, 0A <sub>1</sub> ) | 0201F <sub>2</sub> | 0003F <sub>2</sub> | -9.16(97) × 10 <sup>-1</sup>  |
| 845       | Octad  | 5     | 1(1, 0F <sub>1</sub> ) | 0201F <sub>2</sub> | 0003F <sub>2</sub> | -1.469(95) × 10 <sup>-1</sup> |
| 846       | Octad  | 5     | 1(1, 0F <sub>1</sub> ) | 0201F <sub>2</sub> | 0003F <sub>1</sub> | -6.06(58) × 10 <sup>-2</sup>  |
| 847       | Octad  | 4     | 0(0, 0A <sub>1</sub> ) | 0201F <sub>2</sub> | 0003F <sub>2</sub> | 0.0                           |
| 848       | Octad  | 5     | 1(1, 0F <sub>1</sub> ) | 0201F <sub>2</sub> | 0003F <sub>2</sub> | 6.5(5.7) × 10 <sup>-3</sup>   |
| 849       | Octad  | 4     | 0(0, 0A <sub>1</sub> ) | 0102E              | 0102E              | -3.85(52) × 10 <sup>-1</sup>  |
| 850       | Octad  | 4     | 0(0, 0A <sub>1</sub> ) | 0102E              | 0102E              | 3.53(23) × 10 <sup>-1</sup>   |
| 851       | Octad  | 5     | 1(1, 0F <sub>1</sub> ) | 0102E              | 0102F <sub>1</sub> | 7.3(3.2) × 10 <sup>-3</sup>   |
| 852       | Octad  | 5     | 1(1, 0F <sub>1</sub> ) | 0102E              | 0102F <sub>2</sub> | -5.41(35) × 10 <sup>-2</sup>  |
| 853       | Octad  | 4     | 0(0, 0A <sub>1</sub> ) | 0102A <sub>1</sub> | 0102A <sub>1</sub> | 8.43(28) × 10 <sup>-1</sup>   |
| 854       | Octad  | 5     | 1(1, 0F <sub>1</sub> ) | 0102A <sub>1</sub> | 0102F <sub>1</sub> | 1.128(26) × 10 <sup>-1</sup>  |
| 855       | Octad  | 4     | 0(0, 0A <sub>1</sub> ) | 0102A <sub>2</sub> | 0102A <sub>2</sub> | -3.28(44) × 10 <sup>-2</sup>  |
| 856       | Octad  | 5     | 1(1, 0F <sub>1</sub> ) | 0102A <sub>2</sub> | 0102F <sub>2</sub> | -9.55(25) × 10 <sup>-2</sup>  |
| 857       | Octad  | 4     | 0(0, 0A <sub>1</sub> ) | 0102E              | 0102E              | -1.74(10) × 10 <sup>-1</sup>  |
| 858       | Octad  | 5     | 1(1, 0F <sub>1</sub> ) | 0102E              | 0102F <sub>1</sub> | 4.80(21) × 10 <sup>-2</sup>   |
| 859       | Octad  | 5     | 1(1, 0F <sub>1</sub> ) | 0102E              | 0102F <sub>2</sub> | 1.183(26) × 10 <sup>-1</sup>  |
| 860       | Octad  | 4     | 0(0, 0A <sub>1</sub> ) | 0102F <sub>1</sub> | 0102F <sub>1</sub> | -7.2(1.8) × 10 <sup>-2</sup>  |
| 861       | Octad  | 5     | 1(1, 0F <sub>1</sub> ) | 0102F <sub>1</sub> | 0102F <sub>1</sub> | 3.91(14) × 10 <sup>-2</sup>   |
| 862       | Octad  | 5     | 1(1, 0F <sub>1</sub> ) | 0102F <sub>1</sub> | 0102F <sub>2</sub> | -8.34(21) × 10 <sup>-2</sup>  |
| 863       | Octad  | 4     | 0(0, 0A <sub>1</sub> ) | 0102F <sub>2</sub> | 0102F <sub>2</sub> | -5.66(14) × 10 <sup>-1</sup>  |
| 864       | Octad  | 5     | 1(1, 0F <sub>1</sub> ) | 0102F <sub>2</sub> | 0102F <sub>2</sub> | 0.0                           |
| 865       | Octad  | 5     | 1(1, 0F <sub>1</sub> ) | 0102E              | 0003F <sub>2</sub> | 0.0                           |
| 866       | Octad  | 5     | 1(1, 0F <sub>1</sub> ) | 0102E              | 0003F <sub>1</sub> | -1.830(42) × 10 <sup>-1</sup> |
| 867       | Octad  | 5     | 1(1, 0F <sub>1</sub> ) | 0102E              | 0003F <sub>2</sub> | 4.60(50) × 10 <sup>-2</sup>   |
| 868       | Octad  | 4     | 0(0, 0A <sub>1</sub> ) | 0102A <sub>1</sub> | 0003A <sub>1</sub> | -4.43(30) × 10 <sup>-1</sup>  |
| 869       | Octad  | 5     | 1(1, 0F <sub>1</sub> ) | 0102A <sub>1</sub> | 0003F <sub>1</sub> | 0.0                           |
| 870       | Octad  | 5     | 1(1, 0F <sub>1</sub> ) | 0102A <sub>2</sub> | 0003F <sub>2</sub> | -1.456(46) × 10 <sup>-1</sup> |
| 871       | Octad  | 5     | 1(1, 0F <sub>1</sub> ) | 0102A <sub>2</sub> | 0003F <sub>2</sub> | -1.012(25) × 10 <sup>-1</sup> |
| 872       | Octad  | 5     | 1(1, 0F <sub>1</sub> ) | 0102E              | 0003F <sub>2</sub> | -2.594(62) × 10 <sup>-1</sup> |
| 873       | Octad  | 5     | 1(1, 0F <sub>1</sub> ) | 0102E              | 0003F <sub>1</sub> | -6.23(30) × 10 <sup>-2</sup>  |
| 874       | Octad  | 5     | 1(1, 0F <sub>1</sub> ) | 0102E              | 0003F <sub>2</sub> | -5.40(31) × 10 <sup>-2</sup>  |
| 875       | Octad  | 5     | 1(1, 0F <sub>1</sub> ) | 0102F <sub>1</sub> | 0003F <sub>2</sub> | 0.0                           |
| 876       | Octad  | 5     | 1(1, 0F <sub>1</sub> ) | 0102F <sub>1</sub> | 0003A <sub>1</sub> | 0.0                           |
| 877       | Octad  | 4     | 0(0, 0A <sub>1</sub> ) | 0102F <sub>1</sub> | 0003F <sub>1</sub> | 0.0                           |
| 878       | Octad  | 5     | 1(1, 0F <sub>1</sub> ) | 0102F <sub>1</sub> | 0003F <sub>1</sub> | 0.0                           |
| 879       | Octad  | 5     | 1(1, 0F <sub>1</sub> ) | 0102F <sub>1</sub> | 0003F <sub>2</sub> | 0.0                           |
| 880       | Octad  | 4     | 0(0, 0A <sub>1</sub> ) | 0102F <sub>2</sub> | 0003F <sub>2</sub> | 1.110(38)                     |

Table I (continued).

| Parameter | Polyad     | Order | $\Omega(K, nC)$        | $\{s\} C_1$        | $\{s'\} C_2$       | Value / $\text{cm}^{-1}$      |
|-----------|------------|-------|------------------------|--------------------|--------------------|-------------------------------|
| 881       | Octad      | 5     | 1(1, 0F <sub>1</sub> ) | 0102F <sub>2</sub> | 0003F <sub>2</sub> | 1.258(46) × 10 <sup>-1</sup>  |
| 882       | Octad      | 5     | 1(1, 0F <sub>1</sub> ) | 0102F <sub>2</sub> | 0003F <sub>1</sub> | -1.026(27) × 10 <sup>-1</sup> |
| 883       | Octad      | 4     | 0(0, 0A <sub>1</sub> ) | 0102F <sub>2</sub> | 0003F <sub>2</sub> | 3.98(23) × 10 <sup>-1</sup>   |
| 884       | Octad      | 5     | 1(1, 0F <sub>1</sub> ) | 0102F <sub>2</sub> | 0003F <sub>2</sub> | 1.288(50) × 10 <sup>-1</sup>  |
| 885       | Octad      | 4     | 0(0, 0A <sub>1</sub> ) | 0003F <sub>2</sub> | 0003F <sub>2</sub> | 8.89(15) × 10 <sup>-1</sup>   |
| 886       | Octad      | 5     | 1(1, 0F <sub>1</sub> ) | 0003F <sub>2</sub> | 0003F <sub>2</sub> | 0.0                           |
| 887       | Octad      | 5     | 1(1, 0F <sub>1</sub> ) | 0003F <sub>2</sub> | 0003F <sub>1</sub> | 6.05(29) × 10 <sup>-2</sup>   |
| 888       | Octad      | 4     | 0(0, 0A <sub>1</sub> ) | 0003F <sub>2</sub> | 0003F <sub>2</sub> | 5.48(15) × 10 <sup>-1</sup>   |
| 889       | Octad      | 5     | 1(1, 0F <sub>1</sub> ) | 0003F <sub>2</sub> | 0003F <sub>2</sub> | 0.0                           |
| 890       | Octad      | 4     | 0(0, 0A <sub>1</sub> ) | 0003A <sub>1</sub> | 0003A <sub>1</sub> | -7.89(41) × 10 <sup>-1</sup>  |
| 891       | Octad      | 5     | 1(1, 0F <sub>1</sub> ) | 0003A <sub>1</sub> | 0003F <sub>1</sub> | 5.08(20) × 10 <sup>-2</sup>   |
| 892       | Octad      | 4     | 0(0, 0A <sub>1</sub> ) | 0003F <sub>1</sub> | 0003F <sub>1</sub> | 4.34(15) × 10 <sup>-1</sup>   |
| 893       | Octad      | 5     | 1(1, 0F <sub>1</sub> ) | 0003F <sub>1</sub> | 0003F <sub>1</sub> | -2.148(94) × 10 <sup>-2</sup> |
| 894       | Octad      | 5     | 1(1, 0F <sub>1</sub> ) | 0003F <sub>1</sub> | 0003F <sub>2</sub> | 4.77(11) × 10 <sup>-2</sup>   |
| 895       | Octad      | 4     | 0(0, 0A <sub>1</sub> ) | 0003F <sub>2</sub> | 0003F <sub>2</sub> | 0.0                           |
| 896       | Octad      | 5     | 1(1, 0F <sub>1</sub> ) | 0003F <sub>2</sub> | 0003F <sub>2</sub> | -7.61(30) × 10 <sup>-2</sup>  |
| 897       | Tetradecad | 2     | 0(0, 0A <sub>1</sub> ) | 2000A <sub>1</sub> | 2000A <sub>1</sub> | 26.3(1.6)                     |
| 898       | Tetradecad | 4     | 2(0, 0A <sub>1</sub> ) | 2000A <sub>1</sub> | 2000A <sub>1</sub> | 0.0                           |
| 899       | Tetradecad | 4     | 2(2, 0F <sub>2</sub> ) | 2000A <sub>1</sub> | 1010F <sub>2</sub> | 0.0                           |
| 900       | Tetradecad | 5     | 3(3, 0F <sub>2</sub> ) | 2000A <sub>1</sub> | 1010F <sub>2</sub> | 7.3(1.4) × 10 <sup>-4</sup>   |
| 901       | Tetradecad | 3     | 0(0, 0A <sub>1</sub> ) | 2000A <sub>1</sub> | 1200A <sub>1</sub> | 12.67(51)                     |
| 902       | Tetradecad | 5     | 2(0, 0A <sub>1</sub> ) | 2000A <sub>1</sub> | 1200A <sub>1</sub> | 0.0                           |
| 903       | Tetradecad | 5     | 2(2, 0E )              | 2000A <sub>1</sub> | 1200E              | 0.0                           |
| 904       | Tetradecad | 4     | 1(1, 0F <sub>1</sub> ) | 2000A <sub>1</sub> | 1101F <sub>1</sub> | 0.0                           |
| 905       | Tetradecad | 5     | 2(2, 0F <sub>2</sub> ) | 2000A <sub>1</sub> | 1101F <sub>2</sub> | 0.0                           |
| 906       | Tetradecad | 3     | 0(0, 0A <sub>1</sub> ) | 2000A <sub>1</sub> | 1002A <sub>1</sub> | 3.3(1.2)                      |
| 907       | Tetradecad | 5     | 2(0, 0A <sub>1</sub> ) | 2000A <sub>1</sub> | 1002A <sub>1</sub> | 0.0                           |
| 908       | Tetradecad | 5     | 2(2, 0E )              | 2000A <sub>1</sub> | 1002E              | 0.0                           |
| 909       | Tetradecad | 5     | 2(2, 0F <sub>2</sub> ) | 2000A <sub>1</sub> | 1002F <sub>2</sub> | 0.0                           |
| 910       | Tetradecad | 2     | 0(0, 0A <sub>1</sub> ) | 2000A <sub>1</sub> | 0020A <sub>1</sub> | -86.13(31)                    |
| 911       | Tetradecad | 4     | 2(0, 0A <sub>1</sub> ) | 2000A <sub>1</sub> | 0020A <sub>1</sub> | 0.0                           |
| 912       | Tetradecad | 4     | 2(2, 0E )              | 2000A <sub>1</sub> | 0020E              | 1.24(19) × 10 <sup>-2</sup>   |
| 913       | Tetradecad | 4     | 2(2, 0F <sub>2</sub> ) | 2000A <sub>1</sub> | 0020F <sub>2</sub> | -4.5(1.2) × 10 <sup>-3</sup>  |
| 914       | Tetradecad | 5     | 3(3, 0F <sub>2</sub> ) | 2000A <sub>1</sub> | 0020F <sub>2</sub> | 0.0                           |
| 915       | Tetradecad | 5     | 2(2, 0F <sub>2</sub> ) | 2000A <sub>1</sub> | 0210F <sub>2</sub> | 1.18(28) × 10 <sup>-2</sup>   |
| 916       | Tetradecad | 4     | 1(1, 0F <sub>1</sub> ) | 2000A <sub>1</sub> | 0210F <sub>1</sub> | 0.0                           |
| 917       | Tetradecad | 5     | 2(2, 0F <sub>2</sub> ) | 2000A <sub>1</sub> | 0210F <sub>2</sub> | 0.0                           |
| 918       | Tetradecad | 5     | 2(2, 0E )              | 2000A <sub>1</sub> | 0111E              | 0.0                           |
| 919       | Tetradecad | 4     | 1(1, 0F <sub>1</sub> ) | 2000A <sub>1</sub> | 0111F <sub>1</sub> | 1.910(40)                     |
| 920       | Tetradecad | 5     | 2(2, 0F <sub>2</sub> ) | 2000A <sub>1</sub> | 0111F <sub>2</sub> | 0.0                           |
| 921       | Tetradecad | 3     | 0(0, 0A <sub>1</sub> ) | 2000A <sub>1</sub> | 0111A <sub>1</sub> | 6.51(27)                      |
| 922       | Tetradecad | 5     | 2(0, 0A <sub>1</sub> ) | 2000A <sub>1</sub> | 0111A <sub>1</sub> | 0.0                           |
| 923       | Tetradecad | 5     | 2(2, 0E )              | 2000A <sub>1</sub> | 0111E              | 0.0                           |
| 924       | Tetradecad | 4     | 1(1, 0F <sub>1</sub> ) | 2000A <sub>1</sub> | 0111F <sub>1</sub> | 0.0                           |
| 925       | Tetradecad | 5     | 2(2, 0F <sub>2</sub> ) | 2000A <sub>1</sub> | 0111F <sub>2</sub> | 0.0                           |
| 926       | Tetradecad | 5     | 2(2, 0F <sub>2</sub> ) | 2000A <sub>1</sub> | 0012F <sub>2</sub> | 0.0                           |
| 927       | Tetradecad | 4     | 1(1, 0F <sub>1</sub> ) | 2000A <sub>1</sub> | 0012F <sub>1</sub> | 0.0                           |
| 928       | Tetradecad | 5     | 2(2, 0F <sub>2</sub> ) | 2000A <sub>1</sub> | 0012F <sub>2</sub> | 0.0                           |
| 929       | Tetradecad | 3     | 0(0, 0A <sub>1</sub> ) | 2000A <sub>1</sub> | 0012A <sub>1</sub> | 42.00(73)                     |
| 930       | Tetradecad | 5     | 2(0, 0A <sub>1</sub> ) | 2000A <sub>1</sub> | 0012A <sub>1</sub> | 0.0                           |
| 931       | Tetradecad | 5     | 2(2, 0E )              | 2000A <sub>1</sub> | 0012E              | 0.0                           |
| 932       | Tetradecad | 4     | 1(1, 0F <sub>1</sub> ) | 2000A <sub>1</sub> | 0012F <sub>1</sub> | 2.279(77)                     |
| 933       | Tetradecad | 5     | 2(2, 0F <sub>2</sub> ) | 2000A <sub>1</sub> | 0012F <sub>2</sub> | 0.0                           |
| 934       | Tetradecad | 4     | 0(0, 0A <sub>1</sub> ) | 2000A <sub>1</sub> | 0400A <sub>1</sub> | 0.0                           |
| 935       | Tetradecad | 5     | 1(1, 0F <sub>1</sub> ) | 2000A <sub>1</sub> | 0301F <sub>1</sub> | 0.0                           |
| 936       | Tetradecad | 5     | 1(1, 0F <sub>1</sub> ) | 2000A <sub>1</sub> | 0301F <sub>1</sub> | 0.0                           |
| 937       | Tetradecad | 4     | 0(0, 0A <sub>1</sub> ) | 2000A <sub>1</sub> | 0202A <sub>1</sub> | 0.0                           |
| 938       | Tetradecad | 4     | 0(0, 0A <sub>1</sub> ) | 2000A <sub>1</sub> | 0202A <sub>1</sub> | 0.0                           |
| 939       | Tetradecad | 5     | 1(1, 0F <sub>1</sub> ) | 2000A <sub>1</sub> | 0202F <sub>1</sub> | 0.0                           |
| 940       | Tetradecad | 5     | 1(1, 0F <sub>1</sub> ) | 2000A <sub>1</sub> | 0103F <sub>1</sub> | 0.0                           |
| 941       | Tetradecad | 5     | 1(1, 0F <sub>1</sub> ) | 2000A <sub>1</sub> | 0103F <sub>1</sub> | 0.0                           |
| 942       | Tetradecad | 5     | 1(1, 0F <sub>1</sub> ) | 2000A <sub>1</sub> | 0103F <sub>1</sub> | 0.0                           |
| 943       | Tetradecad | 4     | 0(0, 0A <sub>1</sub> ) | 2000A <sub>1</sub> | 0004A <sub>1</sub> | 0.0                           |
| 944       | Tetradecad | 4     | 0(0, 0A <sub>1</sub> ) | 2000A <sub>1</sub> | 0004A <sub>1</sub> | 0.0                           |
| 945       | Tetradecad | 5     | 1(1, 0F <sub>1</sub> ) | 2000A <sub>1</sub> | 0004F <sub>1</sub> | 0.0                           |
| 946       | Tetradecad | 2     | 0(0, 0A <sub>1</sub> ) | 1010F <sub>2</sub> | 1010F <sub>2</sub> | -68.80(25)                    |
| 947       | Tetradecad | 3     | 1(1, 0F <sub>1</sub> ) | 1010F <sub>2</sub> | 1010F <sub>2</sub> | 7.08(28) × 10 <sup>-1</sup>   |
| 948       | Tetradecad | 4     | 2(0, 0A <sub>1</sub> ) | 1010F <sub>2</sub> | 1010F <sub>2</sub> | 0.0                           |
| 949       | Tetradecad | 4     | 2(2, 0E )              | 1010F <sub>2</sub> | 1010F <sub>2</sub> | 0.0                           |
| 950       | Tetradecad | 4     | 2(2, 0F <sub>2</sub> ) | 1010F <sub>2</sub> | 1010F <sub>2</sub> | 0.0                           |
| 951       | Tetradecad | 5     | 3(1, 0F <sub>1</sub> ) | 1010F <sub>2</sub> | 1010F <sub>2</sub> | 0.0                           |
| 952       | Tetradecad | 5     | 3(3, 0F <sub>1</sub> ) | 1010F <sub>2</sub> | 1010F <sub>2</sub> | -7.84(35) × 10 <sup>-4</sup>  |
| 953       | Tetradecad | 5     | 2(2, 0F <sub>2</sub> ) | 1010F <sub>2</sub> | 1200A <sub>1</sub> | 0.0                           |
| 954       | Tetradecad | 4     | 1(1, 0F <sub>1</sub> ) | 1010F <sub>2</sub> | 1200E              | 0.0                           |
| 955       | Tetradecad | 5     | 2(2, 0F <sub>2</sub> ) | 1010F <sub>2</sub> | 1200E              | 0.0                           |
| 956       | Tetradecad | 4     | 1(1, 0F <sub>1</sub> ) | 1010F <sub>2</sub> | 1101F <sub>1</sub> | 0.0                           |
| 957       | Tetradecad | 5     | 2(2, 0E )              | 1010F <sub>2</sub> | 1101F <sub>1</sub> | 0.0                           |
| 958       | Tetradecad | 5     | 2(2, 0F <sub>2</sub> ) | 1010F <sub>2</sub> | 1101F <sub>1</sub> | -6.44(21) × 10 <sup>-2</sup>  |
| 959       | Tetradecad | 3     | 0(0, 0A <sub>1</sub> ) | 1010F <sub>2</sub> | 1101F <sub>2</sub> | 3.36(10)                      |
| 960       | Tetradecad | 4     | 1(1, 0F <sub>1</sub> ) | 1010F <sub>2</sub> | 1101F <sub>2</sub> | 0.0                           |

Table I (continued).

| Parameter | Polyad     | Order | $\Omega(K, nC')$       | $\{s\} C_1$        | $\{s'\} C_2$       | Value / $\text{cm}^{-1}$      |
|-----------|------------|-------|------------------------|--------------------|--------------------|-------------------------------|
| 961       | Tetradecad | 5     | 2(0, 0A <sub>1</sub> ) | 1010F <sub>2</sub> | 1101F <sub>2</sub> | 0.0                           |
| 962       | Tetradecad | 5     | 2(2, 0E)               | 1010F <sub>2</sub> | 1101F <sub>2</sub> | 0.0                           |
| 963       | Tetradecad | 5     | 2(2, 0F <sub>2</sub> ) | 1010F <sub>2</sub> | 1101F <sub>2</sub> | 0.0                           |
| 964       | Tetradecad | 5     | 2(2, 0F <sub>2</sub> ) | 1010F <sub>2</sub> | 1002A <sub>1</sub> | 0.0                           |
| 965       | Tetradecad | 4     | 1(1, 0F <sub>1</sub> ) | 1010F <sub>2</sub> | 1002E              | 0.0                           |
| 966       | Tetradecad | 5     | 2(2, 0F <sub>2</sub> ) | 1010F <sub>2</sub> | 1002E              | 0.0                           |
| 967       | Tetradecad | 3     | 0(0, 0A <sub>1</sub> ) | 1010F <sub>2</sub> | 1002F <sub>2</sub> | 21.15(52)                     |
| 968       | Tetradecad | 4     | 1(1, 0F <sub>1</sub> ) | 1010F <sub>2</sub> | 1002F <sub>2</sub> | 0.0                           |
| 969       | Tetradecad | 5     | 2(0, 0A <sub>1</sub> ) | 1010F <sub>2</sub> | 1002F <sub>2</sub> | 0.0                           |
| 970       | Tetradecad | 5     | 2(2, 0E)               | 1010F <sub>2</sub> | 1002F <sub>2</sub> | 0.0                           |
| 971       | Tetradecad | 5     | 2(2, 0F <sub>2</sub> ) | 1010F <sub>2</sub> | 1002F <sub>2</sub> | 0.0                           |
| 972       | Tetradecad | 4     | 2(2, 0F <sub>2</sub> ) | 1010F <sub>2</sub> | 0020A <sub>1</sub> | 2.03(43) × 10 <sup>-2</sup>   |
| 973       | Tetradecad | 5     | 3(3, 0F <sub>2</sub> ) | 1010F <sub>2</sub> | 0020A <sub>1</sub> | -1.70(20) × 10 <sup>-3</sup>  |
| 974       | Tetradecad | 3     | 1(1, 0F <sub>1</sub> ) | 1010F <sub>2</sub> | 0020E              | -1.142(58)                    |
| 975       | Tetradecad | 4     | 2(2, 0F <sub>2</sub> ) | 1010F <sub>2</sub> | 0020E              | 4.70(18) × 10 <sup>-2</sup>   |
| 976       | Tetradecad | 5     | 3(1, 0F <sub>1</sub> ) | 1010F <sub>2</sub> | 0020E              | 0.0                           |
| 977       | Tetradecad | 5     | 3(3, 0F <sub>1</sub> ) | 1010F <sub>2</sub> | 0020E              | 0.0                           |
| 978       | Tetradecad | 5     | 3(3, 0F <sub>2</sub> ) | 1010F <sub>2</sub> | 0020E              | 0.0                           |
| 979       | Tetradecad | 2     | 0(0, 0A <sub>1</sub> ) | 1010F <sub>2</sub> | 0020F <sub>2</sub> | 28.14(34)                     |
| 980       | Tetradecad | 3     | 1(1, 0F <sub>1</sub> ) | 1010F <sub>2</sub> | 0020F <sub>2</sub> | 3.078(31)                     |
| 981       | Tetradecad | 4     | 2(0, 0A <sub>1</sub> ) | 1010F <sub>2</sub> | 0020F <sub>2</sub> | -8.51(49) × 10 <sup>-3</sup>  |
| 982       | Tetradecad | 4     | 2(2, 0E)               | 1010F <sub>2</sub> | 0020F <sub>2</sub> | 0.0                           |
| 983       | Tetradecad | 4     | 2(2, 0F <sub>2</sub> ) | 1010F <sub>2</sub> | 0020F <sub>2</sub> | 0.0                           |
| 984       | Tetradecad | 5     | 3(1, 0F <sub>1</sub> ) | 1010F <sub>2</sub> | 0020F <sub>2</sub> | 0.0                           |
| 985       | Tetradecad | 5     | 3(3, 0F <sub>1</sub> ) | 1010F <sub>2</sub> | 0020F <sub>2</sub> | -4.82(20) × 10 <sup>-4</sup>  |
| 986       | Tetradecad | 5     | 3(3, 0F <sub>2</sub> ) | 1010F <sub>2</sub> | 0020F <sub>2</sub> | 0.0                           |
| 987       | Tetradecad | 3     | 0(0, 0A <sub>1</sub> ) | 1010F <sub>2</sub> | 0210F <sub>2</sub> | -4.05(29)                     |
| 988       | Tetradecad | 4     | 1(1, 0F <sub>1</sub> ) | 1010F <sub>2</sub> | 0210F <sub>2</sub> | 1.753(88) × 10 <sup>-1</sup>  |
| 989       | Tetradecad | 5     | 2(0, 0A <sub>1</sub> ) | 1010F <sub>2</sub> | 0210F <sub>2</sub> | 0.0                           |
| 990       | Tetradecad | 5     | 2(2, 0E)               | 1010F <sub>2</sub> | 0210F <sub>2</sub> | 0.0                           |
| 991       | Tetradecad | 5     | 2(2, 0F <sub>2</sub> ) | 1010F <sub>2</sub> | 0210F <sub>2</sub> | 0.0                           |
| 992       | Tetradecad | 4     | 1(1, 0F <sub>1</sub> ) | 1010F <sub>2</sub> | 0210F <sub>1</sub> | 0.0                           |
| 993       | Tetradecad | 5     | 2(2, 0E)               | 1010F <sub>2</sub> | 0210F <sub>1</sub> | 2.139(47) × 10 <sup>-2</sup>  |
| 994       | Tetradecad | 5     | 2(2, 0F <sub>2</sub> ) | 1010F <sub>2</sub> | 0210F <sub>1</sub> | 0.0                           |
| 995       | Tetradecad | 3     | 0(0, 0A <sub>1</sub> ) | 1010F <sub>2</sub> | 0210F <sub>2</sub> | 3.64(11)                      |
| 996       | Tetradecad | 4     | 1(1, 0F <sub>1</sub> ) | 1010F <sub>2</sub> | 0210F <sub>2</sub> | 2.30(11) × 10 <sup>-1</sup>   |
| 997       | Tetradecad | 5     | 2(0, 0A <sub>1</sub> ) | 1010F <sub>2</sub> | 0210F <sub>2</sub> | 0.0                           |
| 998       | Tetradecad | 5     | 2(2, 0E)               | 1010F <sub>2</sub> | 0210F <sub>2</sub> | 0.0                           |
| 999       | Tetradecad | 5     | 2(2, 0F <sub>2</sub> ) | 1010F <sub>2</sub> | 0210F <sub>2</sub> | 0.0                           |
| 1000      | Tetradecad | 4     | 1(1, 0F <sub>1</sub> ) | 1010F <sub>2</sub> | 0111A <sub>2</sub> | 0.0                           |
| 1001      | Tetradecad | 4     | 1(1, 0F <sub>1</sub> ) | 1010F <sub>2</sub> | 0111E              | 2.42(23) × 10 <sup>-1</sup>   |
| 1002      | Tetradecad | 5     | 2(2, 0F <sub>2</sub> ) | 1010F <sub>2</sub> | 0111E              | 1.766(79) × 10 <sup>-2</sup>  |
| 1003      | Tetradecad | 4     | 1(1, 0F <sub>1</sub> ) | 1010F <sub>2</sub> | 0111F <sub>1</sub> | 0.0                           |
| 1004      | Tetradecad | 5     | 2(2, 0E)               | 1010F <sub>2</sub> | 0111F <sub>1</sub> | 0.0                           |
| 1005      | Tetradecad | 5     | 2(2, 0F <sub>2</sub> ) | 1010F <sub>2</sub> | 0111F <sub>1</sub> | -3.622(61) × 10 <sup>-2</sup> |
| 1006      | Tetradecad | 3     | 0(0, 0A <sub>1</sub> ) | 1010F <sub>2</sub> | 0111F <sub>2</sub> | 4.189(81)                     |
| 1007      | Tetradecad | 4     | 1(1, 0F <sub>1</sub> ) | 1010F <sub>2</sub> | 0111F <sub>2</sub> | 0.0                           |
| 1008      | Tetradecad | 5     | 2(0, 0A <sub>1</sub> ) | 1010F <sub>2</sub> | 0111F <sub>2</sub> | 0.0                           |
| 1009      | Tetradecad | 5     | 2(2, 0E)               | 1010F <sub>2</sub> | 0111F <sub>2</sub> | 0.0                           |
| 1010      | Tetradecad | 5     | 2(2, 0F <sub>2</sub> ) | 1010F <sub>2</sub> | 0111F <sub>2</sub> | 0.0                           |
| 1011      | Tetradecad | 5     | 2(2, 0F <sub>2</sub> ) | 1010F <sub>2</sub> | 0111A <sub>1</sub> | 2.847(95) × 10 <sup>-2</sup>  |
| 1012      | Tetradecad | 4     | 1(1, 0F <sub>1</sub> ) | 1010F <sub>2</sub> | 0111E              | -7.63(16) × 10 <sup>-1</sup>  |
| 1013      | Tetradecad | 5     | 2(2, 0F <sub>2</sub> ) | 1010F <sub>2</sub> | 0111E              | 0.0                           |
| 1014      | Tetradecad | 4     | 1(1, 0F <sub>1</sub> ) | 1010F <sub>2</sub> | 0111F <sub>1</sub> | -4.51(27) × 10 <sup>-1</sup>  |
| 1015      | Tetradecad | 5     | 2(2, 0E)               | 1010F <sub>2</sub> | 0111F <sub>1</sub> | 0.0                           |
| 1016      | Tetradecad | 5     | 2(2, 0F <sub>2</sub> ) | 1010F <sub>2</sub> | 0111F <sub>1</sub> | 0.0                           |
| 1017      | Tetradecad | 3     | 0(0, 0A <sub>1</sub> ) | 1010F <sub>2</sub> | 0111F <sub>2</sub> | 0.0                           |
| 1018      | Tetradecad | 4     | 1(1, 0F <sub>1</sub> ) | 1010F <sub>2</sub> | 0111F <sub>2</sub> | 9.29(27) × 10 <sup>-1</sup>   |
| 1019      | Tetradecad | 5     | 2(0, 0A <sub>1</sub> ) | 1010F <sub>2</sub> | 0111F <sub>2</sub> | 0.0                           |
| 1020      | Tetradecad | 5     | 2(2, 0E)               | 1010F <sub>2</sub> | 0111F <sub>2</sub> | 0.0                           |
| 1021      | Tetradecad | 5     | 2(2, 0F <sub>2</sub> ) | 1010F <sub>2</sub> | 0111F <sub>2</sub> | 0.0                           |
| 1022      | Tetradecad | 3     | 0(0, 0A <sub>1</sub> ) | 1010F <sub>2</sub> | 0012F <sub>2</sub> | 0.0                           |
| 1023      | Tetradecad | 4     | 1(1, 0F <sub>1</sub> ) | 1010F <sub>2</sub> | 0012F <sub>2</sub> | -4.1(2.8) × 10 <sup>-2</sup>  |
| 1024      | Tetradecad | 5     | 2(0, 0A <sub>1</sub> ) | 1010F <sub>2</sub> | 0012F <sub>2</sub> | 0.0                           |
| 1025      | Tetradecad | 5     | 2(2, 0E)               | 1010F <sub>2</sub> | 0012F <sub>2</sub> | 2.59(13) × 10 <sup>-2</sup>   |
| 1026      | Tetradecad | 5     | 2(2, 0F <sub>2</sub> ) | 1010F <sub>2</sub> | 0012F <sub>2</sub> | 4.27(13) × 10 <sup>-2</sup>   |
| 1027      | Tetradecad | 4     | 1(1, 0F <sub>1</sub> ) | 1010F <sub>2</sub> | 0012F <sub>1</sub> | 1.374(38)                     |
| 1028      | Tetradecad | 5     | 2(2, 0E)               | 1010F <sub>2</sub> | 0012F <sub>1</sub> | 0.0                           |
| 1029      | Tetradecad | 5     | 2(2, 0F <sub>2</sub> ) | 1010F <sub>2</sub> | 0012F <sub>1</sub> | 0.0                           |
| 1030      | Tetradecad | 3     | 0(0, 0A <sub>1</sub> ) | 1010F <sub>2</sub> | 0012F <sub>2</sub> | 1.5(3.2) × 10 <sup>-1</sup>   |
| 1031      | Tetradecad | 4     | 1(1, 0F <sub>1</sub> ) | 1010F <sub>2</sub> | 0012F <sub>2</sub> | 2.411(55)                     |
| 1032      | Tetradecad | 5     | 2(0, 0A <sub>1</sub> ) | 1010F <sub>2</sub> | 0012F <sub>2</sub> | 0.0                           |
| 1033      | Tetradecad | 5     | 2(2, 0E)               | 1010F <sub>2</sub> | 0012F <sub>2</sub> | 0.0                           |
| 1034      | Tetradecad | 5     | 2(2, 0F <sub>2</sub> ) | 1010F <sub>2</sub> | 0012F <sub>2</sub> | -3.96(26) × 10 <sup>-2</sup>  |
| 1035      | Tetradecad | 5     | 2(2, 0F <sub>2</sub> ) | 1010F <sub>2</sub> | 0012A <sub>1</sub> | 0.0                           |
| 1036      | Tetradecad | 4     | 1(1, 0F <sub>1</sub> ) | 1010F <sub>2</sub> | 0012E              | -3.92(52) × 10 <sup>-1</sup>  |
| 1037      | Tetradecad | 5     | 2(2, 0F <sub>2</sub> ) | 1010F <sub>2</sub> | 0012E              | 0.0                           |
| 1038      | Tetradecad | 4     | 1(1, 0F <sub>1</sub> ) | 1010F <sub>2</sub> | 0012F <sub>1</sub> | 0.0                           |
| 1039      | Tetradecad | 5     | 2(2, 0E)               | 1010F <sub>2</sub> | 0012F <sub>1</sub> | 0.0                           |
| 1040      | Tetradecad | 5     | 2(2, 0F <sub>2</sub> ) | 1010F <sub>2</sub> | 0012F <sub>1</sub> | 0.0                           |



Table I (continued).

| Parameter | Polyad     | Order | $\Omega(K, nC)$        | $\{s\} C_1$        | $\{s'\} C_2$       | Value / $\text{cm}^{-1}$     |
|-----------|------------|-------|------------------------|--------------------|--------------------|------------------------------|
| 1041      | Tetradecad | 3     | 0(0, 0A <sub>1</sub> ) | 1010F <sub>2</sub> | 0012F <sub>2</sub> | 0.0                          |
| 1042      | Tetradecad | 4     | 1(1, 0F <sub>1</sub> ) | 1010F <sub>2</sub> | 0012F <sub>2</sub> | 0.0                          |
| 1043      | Tetradecad | 5     | 2(0, 0A <sub>1</sub> ) | 1010F <sub>2</sub> | 0012F <sub>2</sub> | 0.0                          |
| 1044      | Tetradecad | 5     | 2(2, 0E)               | 1010F <sub>2</sub> | 0012F <sub>2</sub> | -6.94(21) × 10 <sup>-2</sup> |
| 1045      | Tetradecad | 5     | 2(2, 0F <sub>2</sub> ) | 1010F <sub>2</sub> | 0012F <sub>2</sub> | 0.0                          |
| 1046      | Tetradecad | 5     | 1(1, 0F <sub>1</sub> ) | 1010F <sub>2</sub> | 0400E              | 0.0                          |
| 1047      | Tetradecad | 5     | 1(1, 0F <sub>1</sub> ) | 1010F <sub>2</sub> | 0400E              | 0.0                          |
| 1048      | Tetradecad | 5     | 1(1, 0F <sub>1</sub> ) | 1010F <sub>2</sub> | 0301F <sub>1</sub> | 0.0                          |
| 1049      | Tetradecad | 4     | 0(0, 0A <sub>1</sub> ) | 1010F <sub>2</sub> | 0301F <sub>2</sub> | 0.0                          |
| 1050      | Tetradecad | 5     | 1(1, 0F <sub>1</sub> ) | 1010F <sub>2</sub> | 0301F <sub>2</sub> | 0.0                          |
| 1051      | Tetradecad | 4     | 0(0, 0A <sub>1</sub> ) | 1010F <sub>2</sub> | 0301F <sub>2</sub> | 0.0                          |
| 1052      | Tetradecad | 5     | 1(1, 0F <sub>1</sub> ) | 1010F <sub>2</sub> | 0301F <sub>2</sub> | 0.0                          |
| 1053      | Tetradecad | 5     | 1(1, 0F <sub>1</sub> ) | 1010F <sub>2</sub> | 0301F <sub>1</sub> | 2.12(14) × 10 <sup>-1</sup>  |
| 1054      | Tetradecad | 5     | 1(1, 0F <sub>1</sub> ) | 1010F <sub>2</sub> | 0202E              | 0.0                          |
| 1055      | Tetradecad | 4     | 0(0, 0A <sub>1</sub> ) | 1010F <sub>2</sub> | 0202F <sub>2</sub> | -6.99(23)                    |
| 1056      | Tetradecad | 5     | 1(1, 0F <sub>1</sub> ) | 1010F <sub>2</sub> | 0202F <sub>2</sub> | 0.0                          |
| 1057      | Tetradecad | 5     | 1(1, 0F <sub>1</sub> ) | 1010F <sub>2</sub> | 0202E              | 0.0                          |
| 1058      | Tetradecad | 5     | 1(1, 0F <sub>1</sub> ) | 1010F <sub>2</sub> | 0202A <sub>2</sub> | 0.0                          |
| 1059      | Tetradecad | 5     | 1(1, 0F <sub>1</sub> ) | 1010F <sub>2</sub> | 0202E              | 0.0                          |
| 1060      | Tetradecad | 5     | 1(1, 0F <sub>1</sub> ) | 1010F <sub>2</sub> | 0202F <sub>1</sub> | 0.0                          |
| 1061      | Tetradecad | 4     | 0(0, 0A <sub>1</sub> ) | 1010F <sub>2</sub> | 0202F <sub>2</sub> | 3.47(17)                     |
| 1062      | Tetradecad | 5     | 1(1, 0F <sub>1</sub> ) | 1010F <sub>2</sub> | 0202F <sub>2</sub> | 0.0                          |
| 1063      | Tetradecad | 5     | 1(1, 0F <sub>1</sub> ) | 1010F <sub>2</sub> | 0103F <sub>1</sub> | 0.0                          |
| 1064      | Tetradecad | 4     | 0(0, 0A <sub>1</sub> ) | 1010F <sub>2</sub> | 0103F <sub>2</sub> | 0.0                          |
| 1065      | Tetradecad | 5     | 1(1, 0F <sub>1</sub> ) | 1010F <sub>2</sub> | 0103F <sub>2</sub> | 0.0                          |
| 1066      | Tetradecad | 5     | 1(1, 0F <sub>1</sub> ) | 1010F <sub>2</sub> | 0103E              | 0.0                          |
| 1067      | Tetradecad | 5     | 1(1, 0F <sub>1</sub> ) | 1010F <sub>2</sub> | 0103F <sub>1</sub> | 0.0                          |
| 1068      | Tetradecad | 4     | 0(0, 0A <sub>1</sub> ) | 1010F <sub>2</sub> | 0103F <sub>2</sub> | 0.0                          |
| 1069      | Tetradecad | 5     | 1(1, 0F <sub>1</sub> ) | 1010F <sub>2</sub> | 0103F <sub>2</sub> | -4.0(1.4) × 10 <sup>-1</sup> |
| 1070      | Tetradecad | 5     | 1(1, 0F <sub>1</sub> ) | 1010F <sub>2</sub> | 0103F <sub>1</sub> | 0.0                          |
| 1071      | Tetradecad | 4     | 0(0, 0A <sub>1</sub> ) | 1010F <sub>2</sub> | 0103F <sub>2</sub> | 0.0                          |
| 1072      | Tetradecad | 5     | 1(1, 0F <sub>1</sub> ) | 1010F <sub>2</sub> | 0103F <sub>2</sub> | 0.0                          |
| 1073      | Tetradecad | 5     | 1(1, 0F <sub>1</sub> ) | 1010F <sub>2</sub> | 0004E              | 0.0                          |
| 1074      | Tetradecad | 4     | 0(0, 0A <sub>1</sub> ) | 1010F <sub>2</sub> | 0004F <sub>2</sub> | 0.0                          |
| 1075      | Tetradecad | 5     | 1(1, 0F <sub>1</sub> ) | 1010F <sub>2</sub> | 0004F <sub>2</sub> | 0.0                          |
| 1076      | Tetradecad | 5     | 1(1, 0F <sub>1</sub> ) | 1010F <sub>2</sub> | 0004E              | 0.0                          |
| 1077      | Tetradecad | 5     | 1(1, 0F <sub>1</sub> ) | 1010F <sub>2</sub> | 0004F <sub>1</sub> | 0.0                          |
| 1078      | Tetradecad | 4     | 0(0, 0A <sub>1</sub> ) | 1010F <sub>2</sub> | 0004F <sub>2</sub> | 0.0                          |
| 1079      | Tetradecad | 5     | 1(1, 0F <sub>1</sub> ) | 1010F <sub>2</sub> | 0004F <sub>2</sub> | 0.0                          |
| 1080      | Tetradecad | 4     | 0(0, 0A <sub>1</sub> ) | 1200A <sub>1</sub> | 1200A <sub>1</sub> | 0.0                          |
| 1081      | Tetradecad | 4     | 0(0, 0A <sub>1</sub> ) | 1200E              | 1200E              | 0.0                          |
| 1082      | Tetradecad | 5     | 1(1, 0F <sub>1</sub> ) | 1200A <sub>1</sub> | 1101F <sub>1</sub> | 0.0                          |
| 1083      | Tetradecad | 5     | 1(1, 0F <sub>1</sub> ) | 1200E              | 1101F <sub>1</sub> | 0.0                          |
| 1084      | Tetradecad | 5     | 1(1, 0F <sub>1</sub> ) | 1200E              | 1101F <sub>2</sub> | 0.0                          |
| 1085      | Tetradecad | 4     | 0(0, 0A <sub>1</sub> ) | 1200A <sub>1</sub> | 1002A <sub>1</sub> | 0.0                          |
| 1086      | Tetradecad | 4     | 0(0, 0A <sub>1</sub> ) | 1200E              | 1002E              | -8.98(47)                    |
| 1087      | Tetradecad | 5     | 1(1, 0F <sub>1</sub> ) | 1200E              | 1002F <sub>2</sub> | 0.0                          |
| 1088      | Tetradecad | 3     | 0(0, 0A <sub>1</sub> ) | 1200A <sub>1</sub> | 0020A <sub>1</sub> | -17.78(54)                   |
| 1089      | Tetradecad | 5     | 2(0, 0A <sub>1</sub> ) | 1200A <sub>1</sub> | 0020A <sub>1</sub> | 0.0                          |
| 1090      | Tetradecad | 5     | 2(2, 0E)               | 1200A <sub>1</sub> | 0020E              | 0.0                          |
| 1091      | Tetradecad | 5     | 2(2, 0F <sub>2</sub> ) | 1200A <sub>1</sub> | 0020F <sub>2</sub> | 0.0                          |
| 1092      | Tetradecad | 5     | 2(2, 0E)               | 1200E              | 0020A <sub>1</sub> | 0.0                          |
| 1093      | Tetradecad | 3     | 0(0, 0A <sub>1</sub> ) | 1200E              | 0020E              | -5.85(21)                    |
| 1094      | Tetradecad | 5     | 2(0, 0A <sub>1</sub> ) | 1200E              | 0020E              | 0.0                          |
| 1095      | Tetradecad | 5     | 2(2, 0E)               | 1200E              | 0020E              | 0.0                          |
| 1096      | Tetradecad | 4     | 1(1, 0F <sub>1</sub> ) | 1200E              | 0020F <sub>2</sub> | -5.49(15) × 10 <sup>-1</sup> |
| 1097      | Tetradecad | 5     | 2(2, 0F <sub>2</sub> ) | 1200E              | 0020F <sub>2</sub> | 0.0                          |
| 1098      | Tetradecad | 5     | 1(1, 0F <sub>1</sub> ) | 1200A <sub>1</sub> | 0210F <sub>1</sub> | 0.0                          |
| 1099      | Tetradecad | 5     | 1(1, 0F <sub>1</sub> ) | 1200E              | 0210F <sub>2</sub> | 0.0                          |
| 1100      | Tetradecad | 5     | 1(1, 0F <sub>1</sub> ) | 1200E              | 0210F <sub>1</sub> | 0.0                          |
| 1101      | Tetradecad | 5     | 1(1, 0F <sub>1</sub> ) | 1200E              | 0210F <sub>2</sub> | -3.33(26) × 10 <sup>-1</sup> |
| 1102      | Tetradecad | 5     | 1(1, 0F <sub>1</sub> ) | 1200A <sub>1</sub> | 0111F <sub>1</sub> | 0.0                          |
| 1103      | Tetradecad | 4     | 0(0, 0A <sub>1</sub> ) | 1200A <sub>1</sub> | 0111A <sub>1</sub> | -23.03(37)                   |
| 1104      | Tetradecad | 5     | 1(1, 0F <sub>1</sub> ) | 1200A <sub>1</sub> | 0111F <sub>1</sub> | 0.0                          |
| 1105      | Tetradecad | 4     | 0(0, 0A <sub>1</sub> ) | 1200E              | 0111E              | 1.8(1.4) × 10 <sup>-1</sup>  |
| 1106      | Tetradecad | 5     | 1(1, 0F <sub>1</sub> ) | 1200E              | 0111F <sub>1</sub> | 0.0                          |
| 1107      | Tetradecad | 5     | 1(1, 0F <sub>1</sub> ) | 1200E              | 0111F <sub>2</sub> | 0.0                          |
| 1108      | Tetradecad | 4     | 0(0, 0A <sub>1</sub> ) | 1200E              | 0111E              | 0.0                          |
| 1109      | Tetradecad | 5     | 1(1, 0F <sub>1</sub> ) | 1200E              | 0111F <sub>1</sub> | 0.0                          |
| 1110      | Tetradecad | 5     | 1(1, 0F <sub>1</sub> ) | 1200E              | 0111F <sub>2</sub> | 0.0                          |
| 1111      | Tetradecad | 5     | 1(1, 0F <sub>1</sub> ) | 1200A <sub>1</sub> | 0012F <sub>1</sub> | 3.522(64)                    |
| 1112      | Tetradecad | 4     | 0(0, 0A <sub>1</sub> ) | 1200A <sub>1</sub> | 0012A <sub>1</sub> | 44.26(99)                    |
| 1113      | Tetradecad | 5     | 1(1, 0F <sub>1</sub> ) | 1200A <sub>1</sub> | 0012F <sub>1</sub> | 0.0                          |
| 1114      | Tetradecad | 5     | 1(1, 0F <sub>1</sub> ) | 1200E              | 0012F <sub>2</sub> | 0.0                          |
| 1115      | Tetradecad | 5     | 1(1, 0F <sub>1</sub> ) | 1200E              | 0012F <sub>1</sub> | 0.0                          |
| 1116      | Tetradecad | 5     | 1(1, 0F <sub>1</sub> ) | 1200E              | 0012F <sub>2</sub> | 0.0                          |
| 1117      | Tetradecad | 4     | 0(0, 0A <sub>1</sub> ) | 1200E              | 0012E              | 0.0                          |
| 1118      | Tetradecad | 5     | 1(1, 0F <sub>1</sub> ) | 1200E              | 0012F <sub>1</sub> | 0.0                          |
| 1119      | Tetradecad | 5     | 1(1, 0F <sub>1</sub> ) | 1200E              | 0012F <sub>2</sub> | 0.0                          |
| 1120      | Tetradecad | 5     | 0(0, 0A <sub>1</sub> ) | 1200A <sub>1</sub> | 0400A <sub>1</sub> | 0.0                          |

Table I (continued).

| Parameter | Polyad     | Order | $\Omega(K, nC')$       | $\{s\} C_1$        | $\{s'\} C_2$       | Value / $\text{cm}^{-1}$     |
|-----------|------------|-------|------------------------|--------------------|--------------------|------------------------------|
| 1121      | Tetradecad | 5     | 0(0, 0A <sub>1</sub> ) | 1200E              | 0400E              | 0.0                          |
| 1122      | Tetradecad | 5     | 0(0, 0A <sub>1</sub> ) | 1200E              | 0400E              | 0.0                          |
| 1123      | Tetradecad | 5     | 0(0, 0A <sub>1</sub> ) | 1200A <sub>1</sub> | 0202A <sub>1</sub> | 0.0                          |
| 1124      | Tetradecad | 5     | 0(0, 0A <sub>1</sub> ) | 1200A <sub>1</sub> | 0202A <sub>1</sub> | 0.0                          |
| 1125      | Tetradecad | 5     | 0(0, 0A <sub>1</sub> ) | 1200E              | 0202E              | 0.0                          |
| 1126      | Tetradecad | 5     | 0(0, 0A <sub>1</sub> ) | 1200E              | 0202E              | 0.0                          |
| 1127      | Tetradecad | 5     | 0(0, 0A <sub>1</sub> ) | 1200E              | 0202E              | 0.0                          |
| 1128      | Tetradecad | 5     | 0(0, 0A <sub>1</sub> ) | 1200E              | 0103E              | 0.0                          |
| 1129      | Tetradecad | 5     | 0(0, 0A <sub>1</sub> ) | 1200A <sub>1</sub> | 0004A <sub>1</sub> | 24.5(1.5)                    |
| 1130      | Tetradecad | 5     | 0(0, 0A <sub>1</sub> ) | 1200A <sub>1</sub> | 0004A <sub>1</sub> | -8.9(1.8)                    |
| 1131      | Tetradecad | 5     | 0(0, 0A <sub>1</sub> ) | 1200E              | 0004E              | 0.0                          |
| 1132      | Tetradecad | 5     | 0(0, 0A <sub>1</sub> ) | 1200E              | 0004E              | 0.0                          |
| 1133      | Tetradecad | 4     | 0(0, 0A <sub>1</sub> ) | 1101F <sub>1</sub> | 1101F <sub>1</sub> | -1.39(16)                    |
| 1134      | Tetradecad | 5     | 1(1, 0F <sub>1</sub> ) | 1101F <sub>1</sub> | 1101F <sub>1</sub> | 1.046(34)                    |
| 1135      | Tetradecad | 5     | 1(1, 0F <sub>1</sub> ) | 1101F <sub>1</sub> | 1101F <sub>2</sub> | -5.33(24) × 10 <sup>-1</sup> |
| 1136      | Tetradecad | 4     | 0(0, 0A <sub>1</sub> ) | 1101F <sub>2</sub> | 1101F <sub>2</sub> | 0.0                          |
| 1137      | Tetradecad | 5     | 1(1, 0F <sub>1</sub> ) | 1101F <sub>2</sub> | 1101F <sub>2</sub> | 0.0                          |
| 1138      | Tetradecad | 5     | 1(1, 0F <sub>1</sub> ) | 1101F <sub>1</sub> | 1002A <sub>1</sub> | 0.0                          |
| 1139      | Tetradecad | 5     | 1(1, 0F <sub>1</sub> ) | 1101F <sub>1</sub> | 1002E              | 0.0                          |
| 1140      | Tetradecad | 5     | 1(1, 0F <sub>1</sub> ) | 1101F <sub>1</sub> | 1002F <sub>2</sub> | -2.257(73)                   |
| 1141      | Tetradecad | 5     | 1(1, 0F <sub>1</sub> ) | 1101F <sub>2</sub> | 1002E              | 0.0                          |
| 1142      | Tetradecad | 4     | 0(0, 0A <sub>1</sub> ) | 1101F <sub>2</sub> | 1002F <sub>2</sub> | 0.0                          |
| 1143      | Tetradecad | 5     | 1(1, 0F <sub>1</sub> ) | 1101F <sub>2</sub> | 1002F <sub>2</sub> | 0.0                          |
| 1144      | Tetradecad | 4     | 1(1, 0F <sub>1</sub> ) | 1101F <sub>1</sub> | 0020A <sub>1</sub> | 0.0                          |
| 1145      | Tetradecad | 4     | 1(1, 0F <sub>1</sub> ) | 1101F <sub>1</sub> | 0020E              | 0.0                          |
| 1146      | Tetradecad | 5     | 2(2, 0F <sub>2</sub> ) | 1101F <sub>1</sub> | 0020E              | 0.0                          |
| 1147      | Tetradecad | 4     | 1(1, 0F <sub>1</sub> ) | 1101F <sub>1</sub> | 0020F <sub>2</sub> | 0.0                          |
| 1148      | Tetradecad | 5     | 2(2, 0E)               | 1101F <sub>1</sub> | 0020F <sub>2</sub> | 0.0                          |
| 1149      | Tetradecad | 5     | 2(2, 0F <sub>2</sub> ) | 1101F <sub>1</sub> | 0020F <sub>2</sub> | 2.47(13) × 10 <sup>-2</sup>  |
| 1150      | Tetradecad | 5     | 2(2, 0F <sub>2</sub> ) | 1101F <sub>2</sub> | 0020A <sub>1</sub> | 0.0                          |
| 1151      | Tetradecad | 4     | 1(1, 0F <sub>1</sub> ) | 1101F <sub>2</sub> | 0020E              | -3.25(64) × 10 <sup>-1</sup> |
| 1152      | Tetradecad | 5     | 2(2, 0F <sub>2</sub> ) | 1101F <sub>2</sub> | 0020E              | 0.0                          |
| 1153      | Tetradecad | 3     | 0(0, 0A <sub>1</sub> ) | 1101F <sub>2</sub> | 0020F <sub>2</sub> | 5.92(22)                     |
| 1154      | Tetradecad | 4     | 1(1, 0F <sub>1</sub> ) | 1101F <sub>2</sub> | 0020F <sub>2</sub> | -3.89(26) × 10 <sup>-1</sup> |
| 1155      | Tetradecad | 5     | 2(0, 0A <sub>1</sub> ) | 1101F <sub>2</sub> | 0020F <sub>2</sub> | 0.0                          |
| 1156      | Tetradecad | 5     | 2(2, 0E)               | 1101F <sub>2</sub> | 0020F <sub>2</sub> | 0.0                          |
| 1157      | Tetradecad | 5     | 2(2, 0F <sub>2</sub> ) | 1101F <sub>2</sub> | 0020F <sub>2</sub> | 3.06(16) × 10 <sup>-2</sup>  |
| 1158      | Tetradecad | 5     | 1(1, 0F <sub>1</sub> ) | 1101F <sub>1</sub> | 0210F <sub>2</sub> | 0.0                          |
| 1159      | Tetradecad | 4     | 0(0, 0A <sub>1</sub> ) | 1101F <sub>1</sub> | 0210F <sub>1</sub> | 6.1(2.2) × 10 <sup>-1</sup>  |
| 1160      | Tetradecad | 5     | 1(1, 0F <sub>1</sub> ) | 1101F <sub>1</sub> | 0210F <sub>1</sub> | 0.0                          |
| 1161      | Tetradecad | 5     | 1(1, 0F <sub>1</sub> ) | 1101F <sub>1</sub> | 0210F <sub>2</sub> | 0.0                          |
| 1162      | Tetradecad | 4     | 0(0, 0A <sub>1</sub> ) | 1101F <sub>2</sub> | 0210F <sub>2</sub> | 0.0                          |
| 1163      | Tetradecad | 5     | 1(1, 0F <sub>1</sub> ) | 1101F <sub>2</sub> | 0210F <sub>2</sub> | 0.0                          |
| 1164      | Tetradecad | 5     | 1(1, 0F <sub>1</sub> ) | 1101F <sub>2</sub> | 0210F <sub>1</sub> | 0.0                          |
| 1165      | Tetradecad | 4     | 0(0, 0A <sub>1</sub> ) | 1101F <sub>2</sub> | 0210F <sub>2</sub> | -4.49(19)                    |
| 1166      | Tetradecad | 5     | 1(1, 0F <sub>1</sub> ) | 1101F <sub>2</sub> | 0210F <sub>2</sub> | 0.0                          |
| 1167      | Tetradecad | 5     | 1(1, 0F <sub>1</sub> ) | 1101F <sub>1</sub> | 0111E              | -7.84(29) × 10 <sup>-1</sup> |
| 1168      | Tetradecad | 4     | 0(0, 0A <sub>1</sub> ) | 1101F <sub>1</sub> | 0111F <sub>1</sub> | 0.0                          |
| 1169      | Tetradecad | 5     | 1(1, 0F <sub>1</sub> ) | 1101F <sub>1</sub> | 0111F <sub>1</sub> | 6.66(16) × 10 <sup>-1</sup>  |
| 1170      | Tetradecad | 5     | 1(1, 0F <sub>1</sub> ) | 1101F <sub>1</sub> | 0111F <sub>2</sub> | 0.0                          |
| 1171      | Tetradecad | 5     | 1(1, 0F <sub>1</sub> ) | 1101F <sub>1</sub> | 0111A <sub>1</sub> | 0.0                          |
| 1172      | Tetradecad | 5     | 1(1, 0F <sub>1</sub> ) | 1101F <sub>1</sub> | 0111E              | 0.0                          |
| 1173      | Tetradecad | 4     | 0(0, 0A <sub>1</sub> ) | 1101F <sub>1</sub> | 0111F <sub>1</sub> | 3.250(72)                    |
| 1174      | Tetradecad | 5     | 1(1, 0F <sub>1</sub> ) | 1101F <sub>1</sub> | 0111F <sub>1</sub> | 0.0                          |
| 1175      | Tetradecad | 5     | 1(1, 0F <sub>1</sub> ) | 1101F <sub>1</sub> | 0111F <sub>2</sub> | 6.95(21) × 10 <sup>-1</sup>  |
| 1176      | Tetradecad | 5     | 1(1, 0F <sub>1</sub> ) | 1101F <sub>2</sub> | 0111A <sub>2</sub> | 2.53(15) × 10 <sup>-1</sup>  |
| 1177      | Tetradecad | 5     | 1(1, 0F <sub>1</sub> ) | 1101F <sub>2</sub> | 0111E              | 0.0                          |
| 1178      | Tetradecad | 5     | 1(1, 0F <sub>1</sub> ) | 1101F <sub>2</sub> | 0111F <sub>1</sub> | 0.0                          |
| 1179      | Tetradecad | 4     | 0(0, 0A <sub>1</sub> ) | 1101F <sub>2</sub> | 0111F <sub>2</sub> | -1.295(57)                   |
| 1180      | Tetradecad | 5     | 1(1, 0F <sub>1</sub> ) | 1101F <sub>2</sub> | 0111F <sub>2</sub> | 0.0                          |
| 1181      | Tetradecad | 5     | 1(1, 0F <sub>1</sub> ) | 1101F <sub>2</sub> | 0111E              | 0.0                          |
| 1182      | Tetradecad | 5     | 1(1, 0F <sub>1</sub> ) | 1101F <sub>2</sub> | 0111F <sub>1</sub> | 0.0                          |
| 1183      | Tetradecad | 4     | 0(0, 0A <sub>1</sub> ) | 1101F <sub>2</sub> | 0111F <sub>2</sub> | 1.76(61) × 10 <sup>-1</sup>  |
| 1184      | Tetradecad | 5     | 1(1, 0F <sub>1</sub> ) | 1101F <sub>2</sub> | 0111F <sub>2</sub> | 0.0                          |
| 1185      | Tetradecad | 5     | 1(1, 0F <sub>1</sub> ) | 1101F <sub>1</sub> | 0012F <sub>2</sub> | 0.0                          |
| 1186      | Tetradecad | 4     | 0(0, 0A <sub>1</sub> ) | 1101F <sub>1</sub> | 0012F <sub>1</sub> | -6.17(14)                    |
| 1187      | Tetradecad | 5     | 1(1, 0F <sub>1</sub> ) | 1101F <sub>1</sub> | 0012F <sub>1</sub> | 0.0                          |
| 1188      | Tetradecad | 5     | 1(1, 0F <sub>1</sub> ) | 1101F <sub>1</sub> | 0012F <sub>2</sub> | 0.0                          |
| 1189      | Tetradecad | 5     | 1(1, 0F <sub>1</sub> ) | 1101F <sub>1</sub> | 0012A <sub>1</sub> | 0.0                          |
| 1190      | Tetradecad | 5     | 1(1, 0F <sub>1</sub> ) | 1101F <sub>1</sub> | 0012E              | 0.0                          |
| 1191      | Tetradecad | 4     | 0(0, 0A <sub>1</sub> ) | 1101F <sub>1</sub> | 0012F <sub>1</sub> | 3.14(26)                     |
| 1192      | Tetradecad | 5     | 1(1, 0F <sub>1</sub> ) | 1101F <sub>1</sub> | 0012F <sub>1</sub> | 0.0                          |
| 1193      | Tetradecad | 5     | 1(1, 0F <sub>1</sub> ) | 1101F <sub>1</sub> | 0012F <sub>2</sub> | 0.0                          |
| 1194      | Tetradecad | 4     | 0(0, 0A <sub>1</sub> ) | 1101F <sub>2</sub> | 0012F <sub>2</sub> | -4.52(17)                    |
| 1195      | Tetradecad | 5     | 1(1, 0F <sub>1</sub> ) | 1101F <sub>2</sub> | 0012F <sub>2</sub> | 0.0                          |
| 1196      | Tetradecad | 5     | 1(1, 0F <sub>1</sub> ) | 1101F <sub>2</sub> | 0012F <sub>1</sub> | 0.0                          |
| 1197      | Tetradecad | 4     | 0(0, 0A <sub>1</sub> ) | 1101F <sub>2</sub> | 0012F <sub>2</sub> | -1.06(10)                    |
| 1198      | Tetradecad | 5     | 1(1, 0F <sub>1</sub> ) | 1101F <sub>2</sub> | 0012F <sub>2</sub> | 0.0                          |
| 1199      | Tetradecad | 5     | 1(1, 0F <sub>1</sub> ) | 1101F <sub>2</sub> | 0012E              | 0.0                          |
| 1200      | Tetradecad | 5     | 1(1, 0F <sub>1</sub> ) | 1101F <sub>2</sub> | 0012F <sub>1</sub> | 0.0                          |

Table I (continued).

| Parameter | Polyad     | Order | $\Omega(K, nC)$        | $\{s\} C_1$        | $\{s'\} C_2$       | Value / $\text{cm}^{-1}$      |
|-----------|------------|-------|------------------------|--------------------|--------------------|-------------------------------|
| 1201      | Tetradecad | 4     | 0(0, 0A <sub>1</sub> ) | 1101F <sub>2</sub> | 0012F <sub>2</sub> | 0.0                           |
| 1202      | Tetradecad | 5     | 1(1, 0F <sub>1</sub> ) | 1101F <sub>2</sub> | 0012F <sub>2</sub> | 0.0                           |
| 1203      | Tetradecad | 5     | 0(0, 0A <sub>1</sub> ) | 1101F <sub>1</sub> | 0301F <sub>1</sub> | 0.0                           |
| 1204      | Tetradecad | 5     | 0(0, 0A <sub>1</sub> ) | 1101F <sub>1</sub> | 0301F <sub>1</sub> | 0.0                           |
| 1205      | Tetradecad | 5     | 0(0, 0A <sub>1</sub> ) | 1101F <sub>2</sub> | 0301F <sub>2</sub> | 0.0                           |
| 1206      | Tetradecad | 5     | 0(0, 0A <sub>1</sub> ) | 1101F <sub>2</sub> | 0301F <sub>2</sub> | 0.0                           |
| 1207      | Tetradecad | 5     | 0(0, 0A <sub>1</sub> ) | 1101F <sub>1</sub> | 0202F <sub>1</sub> | 0.0                           |
| 1208      | Tetradecad | 5     | 0(0, 0A <sub>1</sub> ) | 1101F <sub>2</sub> | 0202F <sub>2</sub> | 0.0                           |
| 1209      | Tetradecad | 5     | 0(0, 0A <sub>1</sub> ) | 1101F <sub>2</sub> | 0202F <sub>2</sub> | 0.0                           |
| 1210      | Tetradecad | 5     | 0(0, 0A <sub>1</sub> ) | 1101F <sub>1</sub> | 0103F <sub>1</sub> | 1.144(73)                     |
| 1211      | Tetradecad | 5     | 0(0, 0A <sub>1</sub> ) | 1101F <sub>1</sub> | 0103F <sub>1</sub> | 0.0                           |
| 1212      | Tetradecad | 5     | 0(0, 0A <sub>1</sub> ) | 1101F <sub>1</sub> | 0103F <sub>1</sub> | 0.0                           |
| 1213      | Tetradecad | 5     | 0(0, 0A <sub>1</sub> ) | 1101F <sub>2</sub> | 0103F <sub>2</sub> | 0.0                           |
| 1214      | Tetradecad | 5     | 0(0, 0A <sub>1</sub> ) | 1101F <sub>2</sub> | 0103F <sub>2</sub> | -4.02(17)                     |
| 1215      | Tetradecad | 5     | 0(0, 0A <sub>1</sub> ) | 1101F <sub>2</sub> | 0103F <sub>2</sub> | -1.22(11)                     |
| 1216      | Tetradecad | 5     | 0(0, 0A <sub>1</sub> ) | 1101F <sub>1</sub> | 0004F <sub>1</sub> | 0.0                           |
| 1217      | Tetradecad | 5     | 0(0, 0A <sub>1</sub> ) | 1101F <sub>2</sub> | 0004F <sub>2</sub> | 8.5(2.0) × 10 <sup>-1</sup>   |
| 1218      | Tetradecad | 5     | 0(0, 0A <sub>1</sub> ) | 1101F <sub>2</sub> | 0004F <sub>2</sub> | 2.36(24)                      |
| 1219      | Tetradecad | 4     | 0(0, 0A <sub>1</sub> ) | 1002A <sub>1</sub> | 1002A <sub>1</sub> | 1.28(37)                      |
| 1220      | Tetradecad | 4     | 0(0, 0A <sub>1</sub> ) | 1002E              | 1002E              | 6.04(15)                      |
| 1221      | Tetradecad | 5     | 1(1, 0F <sub>1</sub> ) | 1002E              | 1002F <sub>2</sub> | 0.0                           |
| 1222      | Tetradecad | 4     | 0(0, 0A <sub>1</sub> ) | 1002F <sub>2</sub> | 1002F <sub>2</sub> | 0.0                           |
| 1223      | Tetradecad | 5     | 1(1, 0F <sub>1</sub> ) | 1002F <sub>2</sub> | 1002F <sub>2</sub> | 0.0                           |
| 1224      | Tetradecad | 3     | 0(0, 0A <sub>1</sub> ) | 1002A <sub>1</sub> | 0020A <sub>1</sub> | 0.0                           |
| 1225      | Tetradecad | 5     | 2(0, 0A <sub>1</sub> ) | 1002A <sub>1</sub> | 0020A <sub>1</sub> | 2.52(11) × 10 <sup>-1</sup>   |
| 1226      | Tetradecad | 5     | 2(2, 0E)               | 1002A <sub>1</sub> | 0020E              | 0.0                           |
| 1227      | Tetradecad | 5     | 2(2, 0F <sub>2</sub> ) | 1002A <sub>1</sub> | 0020F <sub>2</sub> | 0.0                           |
| 1228      | Tetradecad | 5     | 2(2, 0E)               | 1002E              | 0020A <sub>1</sub> | -5.027(59) × 10 <sup>-1</sup> |
| 1229      | Tetradecad | 3     | 0(0, 0A <sub>1</sub> ) | 1002E              | 0020E              | 15.9(1.5)                     |
| 1230      | Tetradecad | 5     | 2(0, 0A <sub>1</sub> ) | 1002E              | 0020E              | 0.0                           |
| 1231      | Tetradecad | 5     | 2(2, 0E)               | 1002E              | 0020E              | 0.0                           |
| 1232      | Tetradecad | 4     | 1(1, 0F <sub>1</sub> ) | 1002E              | 0020F <sub>2</sub> | 0.0                           |
| 1233      | Tetradecad | 5     | 2(2, 0F <sub>2</sub> ) | 1002E              | 0020F <sub>2</sub> | 0.0                           |
| 1234      | Tetradecad | 5     | 2(2, 0F <sub>2</sub> ) | 1002F <sub>2</sub> | 0020A <sub>1</sub> | 0.0                           |
| 1235      | Tetradecad | 4     | 1(1, 0F <sub>1</sub> ) | 1002F <sub>2</sub> | 0020E              | 0.0                           |
| 1236      | Tetradecad | 5     | 2(2, 0F <sub>2</sub> ) | 1002F <sub>2</sub> | 0020E              | 0.0                           |
| 1237      | Tetradecad | 3     | 0(0, 0A <sub>1</sub> ) | 1002F <sub>2</sub> | 0020F <sub>2</sub> | 39.26(48)                     |
| 1238      | Tetradecad | 4     | 1(1, 0F <sub>1</sub> ) | 1002F <sub>2</sub> | 0020F <sub>2</sub> | 2.586(98)                     |
| 1239      | Tetradecad | 5     | 2(0, 0A <sub>1</sub> ) | 1002F <sub>2</sub> | 0020F <sub>2</sub> | 0.0                           |
| 1240      | Tetradecad | 5     | 2(2, 0E)               | 1002F <sub>2</sub> | 0020F <sub>2</sub> | 0.0                           |
| 1241      | Tetradecad | 5     | 2(2, 0F <sub>2</sub> ) | 1002F <sub>2</sub> | 0020F <sub>2</sub> | 0.0                           |
| 1242      | Tetradecad | 5     | 1(1, 0F <sub>1</sub> ) | 1002A <sub>1</sub> | 0210F <sub>1</sub> | -4.0(2.3) × 10 <sup>-1</sup>  |
| 1243      | Tetradecad | 5     | 1(1, 0F <sub>1</sub> ) | 1002E              | 0210F <sub>2</sub> | -3.215(58)                    |
| 1244      | Tetradecad | 5     | 1(1, 0F <sub>1</sub> ) | 1002E              | 0210F <sub>1</sub> | 1.779(79)                     |
| 1245      | Tetradecad | 5     | 1(1, 0F <sub>1</sub> ) | 1002E              | 0210F <sub>2</sub> | -2.032(84)                    |
| 1246      | Tetradecad | 4     | 0(0, 0A <sub>1</sub> ) | 1002F <sub>2</sub> | 0210F <sub>2</sub> | 2.34(44)                      |
| 1247      | Tetradecad | 5     | 1(1, 0F <sub>1</sub> ) | 1002F <sub>2</sub> | 0210F <sub>2</sub> | 0.0                           |
| 1248      | Tetradecad | 5     | 1(1, 0F <sub>1</sub> ) | 1002F <sub>2</sub> | 0210F <sub>1</sub> | 3.110(64)                     |
| 1249      | Tetradecad | 4     | 0(0, 0A <sub>1</sub> ) | 1002F <sub>2</sub> | 0210F <sub>2</sub> | 0.0                           |
| 1250      | Tetradecad | 5     | 1(1, 0F <sub>1</sub> ) | 1002F <sub>2</sub> | 0210F <sub>2</sub> | 0.0                           |
| 1251      | Tetradecad | 5     | 1(1, 0F <sub>1</sub> ) | 1002A <sub>1</sub> | 0111F <sub>1</sub> | 0.0                           |
| 1252      | Tetradecad | 4     | 0(0, 0A <sub>1</sub> ) | 1002A <sub>1</sub> | 0111A <sub>1</sub> | 0.0                           |
| 1253      | Tetradecad | 5     | 1(1, 0F <sub>1</sub> ) | 1002A <sub>1</sub> | 0111F <sub>1</sub> | 0.0                           |
| 1254      | Tetradecad | 4     | 0(0, 0A <sub>1</sub> ) | 1002E              | 0111E              | -11.03(35)                    |
| 1255      | Tetradecad | 5     | 1(1, 0F <sub>1</sub> ) | 1002E              | 0111F <sub>1</sub> | 0.0                           |
| 1256      | Tetradecad | 5     | 1(1, 0F <sub>1</sub> ) | 1002E              | 0111F <sub>2</sub> | 0.0                           |
| 1257      | Tetradecad | 4     | 0(0, 0A <sub>1</sub> ) | 1002E              | 0111E              | -1.93(26)                     |
| 1258      | Tetradecad | 5     | 1(1, 0F <sub>1</sub> ) | 1002E              | 0111F <sub>1</sub> | 0.0                           |
| 1259      | Tetradecad | 5     | 1(1, 0F <sub>1</sub> ) | 1002E              | 0111F <sub>2</sub> | -9.8(6.7) × 10 <sup>-2</sup>  |
| 1260      | Tetradecad | 5     | 1(1, 0F <sub>1</sub> ) | 1002F <sub>2</sub> | 0111A <sub>2</sub> | 0.0                           |
| 1261      | Tetradecad | 5     | 1(1, 0F <sub>1</sub> ) | 1002F <sub>2</sub> | 0111E              | 0.0                           |
| 1262      | Tetradecad | 5     | 1(1, 0F <sub>1</sub> ) | 1002F <sub>2</sub> | 0111F <sub>1</sub> | 0.0                           |
| 1263      | Tetradecad | 4     | 0(0, 0A <sub>1</sub> ) | 1002F <sub>2</sub> | 0111F <sub>2</sub> | 0.0                           |
| 1264      | Tetradecad | 5     | 1(1, 0F <sub>1</sub> ) | 1002F <sub>2</sub> | 0111F <sub>2</sub> | 0.0                           |
| 1265      | Tetradecad | 5     | 1(1, 0F <sub>1</sub> ) | 1002F <sub>2</sub> | 0111E              | 0.0                           |
| 1266      | Tetradecad | 5     | 1(1, 0F <sub>1</sub> ) | 1002F <sub>2</sub> | 0111F <sub>1</sub> | 0.0                           |
| 1267      | Tetradecad | 4     | 0(0, 0A <sub>1</sub> ) | 1002F <sub>2</sub> | 0111F <sub>2</sub> | -7.95(34)                     |
| 1268      | Tetradecad | 5     | 1(1, 0F <sub>1</sub> ) | 1002F <sub>2</sub> | 0111F <sub>2</sub> | 0.0                           |
| 1269      | Tetradecad | 5     | 1(1, 0F <sub>1</sub> ) | 1002A <sub>1</sub> | 0012F <sub>1</sub> | 0.0                           |
| 1270      | Tetradecad | 4     | 0(0, 0A <sub>1</sub> ) | 1002A <sub>1</sub> | 0012A <sub>1</sub> | 0.0                           |
| 1271      | Tetradecad | 5     | 1(1, 0F <sub>1</sub> ) | 1002A <sub>1</sub> | 0012F <sub>1</sub> | 0.0                           |
| 1272      | Tetradecad | 5     | 1(1, 0F <sub>1</sub> ) | 1002E              | 0012F <sub>2</sub> | 0.0                           |
| 1273      | Tetradecad | 5     | 1(1, 0F <sub>1</sub> ) | 1002E              | 0012F <sub>1</sub> | 3.92(23) × 10 <sup>-1</sup>   |
| 1274      | Tetradecad | 5     | 1(1, 0F <sub>1</sub> ) | 1002E              | 0012F <sub>2</sub> | 1.085(26)                     |
| 1275      | Tetradecad | 4     | 0(0, 0A <sub>1</sub> ) | 1002E              | 0012E              | 3.008(98)                     |
| 1276      | Tetradecad | 5     | 1(1, 0F <sub>1</sub> ) | 1002E              | 0012F <sub>1</sub> | -6.17(26) × 10 <sup>-1</sup>  |
| 1277      | Tetradecad | 5     | 1(1, 0F <sub>1</sub> ) | 1002E              | 0012F <sub>2</sub> | -3.44(30) × 10 <sup>-1</sup>  |
| 1278      | Tetradecad | 4     | 0(0, 0A <sub>1</sub> ) | 1002F <sub>2</sub> | 0012F <sub>2</sub> | 0.0                           |
| 1279      | Tetradecad | 5     | 1(1, 0F <sub>1</sub> ) | 1002F <sub>2</sub> | 0012F <sub>2</sub> | 0.0                           |
| 1280      | Tetradecad | 5     | 1(1, 0F <sub>1</sub> ) | 1002F <sub>2</sub> | 0012F <sub>1</sub> | 8.25(29) × 10 <sup>-1</sup>   |

Table I (continued).

| Parameter | Polyad     | Order | $\Omega(K, nC')$       | $\{s\} C_1$        | $\{s'\} C_2$       | Value / $\text{cm}^{-1}$      |
|-----------|------------|-------|------------------------|--------------------|--------------------|-------------------------------|
| 1281      | Tetradecad | 4     | 0(0, 0A <sub>1</sub> ) | 1002F <sub>2</sub> | 0012F <sub>2</sub> | -3.199(80)                    |
| 1282      | Tetradecad | 5     | 1(1, 0F <sub>1</sub> ) | 1002F <sub>2</sub> | 0012F <sub>2</sub> | 0.0                           |
| 1283      | Tetradecad | 5     | 1(1, 0F <sub>1</sub> ) | 1002F <sub>2</sub> | 0012E              | -4.66(23) × 10 <sup>-1</sup>  |
| 1284      | Tetradecad | 5     | 1(1, 0F <sub>1</sub> ) | 1002F <sub>2</sub> | 0012F <sub>1</sub> | 0.0                           |
| 1285      | Tetradecad | 4     | 0(0, 0A <sub>1</sub> ) | 1002F <sub>2</sub> | 0012F <sub>2</sub> | 0.0                           |
| 1286      | Tetradecad | 5     | 1(1, 0F <sub>1</sub> ) | 1002F <sub>2</sub> | 0012F <sub>2</sub> | 4.52(33) × 10 <sup>-1</sup>   |
| 1287      | Tetradecad | 5     | 0(0, 0A <sub>1</sub> ) | 1002A <sub>1</sub> | 0400A <sub>1</sub> | 0.0                           |
| 1288      | Tetradecad | 5     | 0(0, 0A <sub>1</sub> ) | 1002E              | 0400E              | 0.0                           |
| 1289      | Tetradecad | 5     | 0(0, 0A <sub>1</sub> ) | 1002E              | 0400E              | 0.0                           |
| 1290      | Tetradecad | 5     | 0(0, 0A <sub>1</sub> ) | 1002F <sub>2</sub> | 0301F <sub>2</sub> | 0.0                           |
| 1291      | Tetradecad | 5     | 0(0, 0A <sub>1</sub> ) | 1002F <sub>2</sub> | 0301F <sub>2</sub> | 0.0                           |
| 1292      | Tetradecad | 5     | 0(0, 0A <sub>1</sub> ) | 1002A <sub>1</sub> | 0202A <sub>1</sub> | 0.0                           |
| 1293      | Tetradecad | 5     | 0(0, 0A <sub>1</sub> ) | 1002A <sub>1</sub> | 0202A <sub>1</sub> | 0.0                           |
| 1294      | Tetradecad | 5     | 0(0, 0A <sub>1</sub> ) | 1002E              | 0202E              | 0.0                           |
| 1295      | Tetradecad | 5     | 0(0, 0A <sub>1</sub> ) | 1002E              | 0202E              | 0.0                           |
| 1296      | Tetradecad | 5     | 0(0, 0A <sub>1</sub> ) | 1002E              | 0202E              | -1.336(70)                    |
| 1297      | Tetradecad | 5     | 0(0, 0A <sub>1</sub> ) | 1002F <sub>2</sub> | 0202F <sub>2</sub> | 0.0                           |
| 1298      | Tetradecad | 5     | 0(0, 0A <sub>1</sub> ) | 1002F <sub>2</sub> | 0202F <sub>2</sub> | 0.0                           |
| 1299      | Tetradecad | 5     | 0(0, 0A <sub>1</sub> ) | 1002E              | 0103E              | 3.29(12)                      |
| 1300      | Tetradecad | 5     | 0(0, 0A <sub>1</sub> ) | 1002F <sub>2</sub> | 0103F <sub>2</sub> | 0.0                           |
| 1301      | Tetradecad | 5     | 0(0, 0A <sub>1</sub> ) | 1002F <sub>2</sub> | 0103F <sub>2</sub> | 0.0                           |
| 1302      | Tetradecad | 5     | 0(0, 0A <sub>1</sub> ) | 1002F <sub>2</sub> | 0103F <sub>2</sub> | -2.35(96) × 10 <sup>-1</sup>  |
| 1303      | Tetradecad | 5     | 0(0, 0A <sub>1</sub> ) | 1002A <sub>1</sub> | 0004A <sub>1</sub> | 4.85(35)                      |
| 1304      | Tetradecad | 5     | 0(0, 0A <sub>1</sub> ) | 1002A <sub>1</sub> | 0004A <sub>1</sub> | 0.0                           |
| 1305      | Tetradecad | 5     | 0(0, 0A <sub>1</sub> ) | 1002E              | 0004E              | 0.0                           |
| 1306      | Tetradecad | 5     | 0(0, 0A <sub>1</sub> ) | 1002E              | 0004E              | 0.0                           |
| 1307      | Tetradecad | 5     | 0(0, 0A <sub>1</sub> ) | 1002F <sub>2</sub> | 0004F <sub>2</sub> | 0.0                           |
| 1308      | Tetradecad | 5     | 0(0, 0A <sub>1</sub> ) | 1002F <sub>2</sub> | 0004F <sub>2</sub> | 0.0                           |
| 1309      | Tetradecad | 2     | 0(0, 0A <sub>1</sub> ) | 0020A <sub>1</sub> | 0020A <sub>1</sub> | -155.8(1.3)                   |
| 1310      | Tetradecad | 4     | 2(0, 0A <sub>1</sub> ) | 0020A <sub>1</sub> | 0020A <sub>1</sub> | -1.177(56) × 10 <sup>-1</sup> |
| 1311      | Tetradecad | 4     | 2(2, 0E )              | 0020A <sub>1</sub> | 0020E              | 0.0                           |
| 1312      | Tetradecad | 4     | 2(2, 0F <sub>2</sub> ) | 0020A <sub>1</sub> | 0020F <sub>2</sub> | 6.1(1.7) × 10 <sup>-3</sup>   |
| 1313      | Tetradecad | 5     | 3(3, 0F <sub>2</sub> ) | 0020A <sub>1</sub> | 0020F <sub>2</sub> | 0.0                           |
| 1314      | Tetradecad | 2     | 0(0, 0A <sub>1</sub> ) | 0020E              | 0020E              | 4.26(15)                      |
| 1315      | Tetradecad | 4     | 2(0, 0A <sub>1</sub> ) | 0020E              | 0020E              | -8.25(26) × 10 <sup>-3</sup>  |
| 1316      | Tetradecad | 4     | 2(2, 0E )              | 0020E              | 0020E              | -8.05(29) × 10 <sup>-3</sup>  |
| 1317      | Tetradecad | 5     | 3(3, 0A <sub>2</sub> ) | 0020E              | 0020E              | 0.0                           |
| 1318      | Tetradecad | 3     | 1(1, 0F <sub>1</sub> ) | 0020E              | 0020F <sub>2</sub> | 0.0                           |
| 1319      | Tetradecad | 4     | 2(2, 0F <sub>2</sub> ) | 0020E              | 0020F <sub>2</sub> | 0.0                           |
| 1320      | Tetradecad | 5     | 3(1, 0F <sub>1</sub> ) | 0020E              | 0020F <sub>2</sub> | 0.0                           |
| 1321      | Tetradecad | 5     | 3(3, 0F <sub>1</sub> ) | 0020E              | 0020F <sub>2</sub> | 0.0                           |
| 1322      | Tetradecad | 5     | 3(3, 0F <sub>2</sub> ) | 0020E              | 0020F <sub>2</sub> | 0.0                           |
| 1323      | Tetradecad | 2     | 0(0, 0A <sub>1</sub> ) | 0020F <sub>2</sub> | 0020F <sub>2</sub> | -49.07(19)                    |
| 1324      | Tetradecad | 3     | 1(1, 0F <sub>1</sub> ) | 0020F <sub>2</sub> | 0020F <sub>2</sub> | -7.88(30) × 10 <sup>-1</sup>  |
| 1325      | Tetradecad | 4     | 2(0, 0A <sub>1</sub> ) | 0020F <sub>2</sub> | 0020F <sub>2</sub> | -1.828(47) × 10 <sup>-2</sup> |
| 1326      | Tetradecad | 4     | 2(2, 0E )              | 0020F <sub>2</sub> | 0020F <sub>2</sub> | -5.96(54) × 10 <sup>-3</sup>  |
| 1327      | Tetradecad | 4     | 2(2, 0F <sub>2</sub> ) | 0020F <sub>2</sub> | 0020F <sub>2</sub> | 3.468(69) × 10 <sup>-2</sup>  |
| 1328      | Tetradecad | 5     | 3(1, 0F <sub>1</sub> ) | 0020F <sub>2</sub> | 0020F <sub>2</sub> | 0.0                           |
| 1329      | Tetradecad | 5     | 3(3, 0F <sub>1</sub> ) | 0020F <sub>2</sub> | 0020F <sub>2</sub> | 0.0                           |
| 1330      | Tetradecad | 5     | 2(2, 0F <sub>2</sub> ) | 0020A <sub>1</sub> | 0210F <sub>2</sub> | 0.0                           |
| 1331      | Tetradecad | 4     | 1(1, 0F <sub>1</sub> ) | 0020A <sub>1</sub> | 0210F <sub>1</sub> | 5.08(50) × 10 <sup>-1</sup>   |
| 1332      | Tetradecad | 5     | 2(2, 0F <sub>2</sub> ) | 0020A <sub>1</sub> | 0210F <sub>2</sub> | 0.0                           |
| 1333      | Tetradecad | 4     | 1(1, 0F <sub>1</sub> ) | 0020E              | 0210F <sub>2</sub> | 6.6(2.6) × 10 <sup>-2</sup>   |
| 1334      | Tetradecad | 5     | 2(2, 0F <sub>2</sub> ) | 0020E              | 0210F <sub>2</sub> | 0.0                           |
| 1335      | Tetradecad | 4     | 1(1, 0F <sub>1</sub> ) | 0020E              | 0210F <sub>1</sub> | 1.95(77) × 10 <sup>-2</sup>   |
| 1336      | Tetradecad | 5     | 2(2, 0F <sub>2</sub> ) | 0020E              | 0210F <sub>1</sub> | 0.0                           |
| 1337      | Tetradecad | 4     | 1(1, 0F <sub>1</sub> ) | 0020E              | 0210F <sub>2</sub> | 0.0                           |
| 1338      | Tetradecad | 5     | 2(2, 0F <sub>2</sub> ) | 0020E              | 0210F <sub>2</sub> | 0.0                           |
| 1339      | Tetradecad | 3     | 0(0, 0A <sub>1</sub> ) | 0020F <sub>2</sub> | 0210F <sub>2</sub> | 13.43(17)                     |
| 1340      | Tetradecad | 4     | 1(1, 0F <sub>1</sub> ) | 0020F <sub>2</sub> | 0210F <sub>2</sub> | 3.02(24) × 10 <sup>-1</sup>   |
| 1341      | Tetradecad | 5     | 2(0, 0A <sub>1</sub> ) | 0020F <sub>2</sub> | 0210F <sub>2</sub> | 0.0                           |
| 1342      | Tetradecad | 5     | 2(2, 0E )              | 0020F <sub>2</sub> | 0210F <sub>2</sub> | 0.0                           |
| 1343      | Tetradecad | 5     | 2(2, 0F <sub>2</sub> ) | 0020F <sub>2</sub> | 0210F <sub>2</sub> | 0.0                           |
| 1344      | Tetradecad | 4     | 1(1, 0F <sub>1</sub> ) | 0020F <sub>2</sub> | 0210F <sub>1</sub> | -1.289(20)                    |
| 1345      | Tetradecad | 5     | 2(2, 0E )              | 0020F <sub>2</sub> | 0210F <sub>1</sub> | 0.0                           |
| 1346      | Tetradecad | 5     | 2(2, 0F <sub>2</sub> ) | 0020F <sub>2</sub> | 0210F <sub>1</sub> | 0.0                           |
| 1347      | Tetradecad | 3     | 0(0, 0A <sub>1</sub> ) | 0020F <sub>2</sub> | 0210F <sub>2</sub> | 8.12(10)                      |
| 1348      | Tetradecad | 4     | 1(1, 0F <sub>1</sub> ) | 0020F <sub>2</sub> | 0210F <sub>2</sub> | 0.0                           |
| 1349      | Tetradecad | 5     | 2(0, 0A <sub>1</sub> ) | 0020F <sub>2</sub> | 0210F <sub>2</sub> | 0.0                           |
| 1350      | Tetradecad | 5     | 2(2, 0E )              | 0020F <sub>2</sub> | 0210F <sub>2</sub> | 3.041(57) × 10 <sup>-2</sup>  |
| 1351      | Tetradecad | 5     | 2(2, 0F <sub>2</sub> ) | 0020F <sub>2</sub> | 0210F <sub>2</sub> | 2.97(58) × 10 <sup>-3</sup>   |
| 1352      | Tetradecad | 5     | 2(2, 0E )              | 0020A <sub>1</sub> | 0111E              | -9.09(21) × 10 <sup>-2</sup>  |
| 1353      | Tetradecad | 4     | 1(1, 0F <sub>1</sub> ) | 0020A <sub>1</sub> | 0111F <sub>1</sub> | -1.580(36)                    |
| 1354      | Tetradecad | 5     | 2(2, 0F <sub>2</sub> ) | 0020A <sub>1</sub> | 0111F <sub>2</sub> | 0.0                           |
| 1355      | Tetradecad | 3     | 0(0, 0A <sub>1</sub> ) | 0020A <sub>1</sub> | 0111A <sub>1</sub> | -10.81(28)                    |
| 1356      | Tetradecad | 5     | 2(0, 0A <sub>1</sub> ) | 0020A <sub>1</sub> | 0111A <sub>1</sub> | 0.0                           |
| 1357      | Tetradecad | 5     | 2(2, 0E )              | 0020A <sub>1</sub> | 0111E              | 0.0                           |
| 1358      | Tetradecad | 4     | 1(1, 0F <sub>1</sub> ) | 0020A <sub>1</sub> | 0111F <sub>1</sub> | 0.0                           |
| 1359      | Tetradecad | 5     | 2(2, 0F <sub>2</sub> ) | 0020A <sub>1</sub> | 0111F <sub>2</sub> | 1.594(25) × 10 <sup>-1</sup>  |
| 1360      | Tetradecad | 5     | 2(2, 0E )              | 0020E              | 0111A <sub>2</sub> | -3.54(12) × 10 <sup>-2</sup>  |

Table I (continued).

| Parameter | Polyad     | Order | $\Omega(K, nC)$        | $\{s\} C_1$        | $\{s'\} C_2$       | Value / $\text{cm}^{-1}$     |
|-----------|------------|-------|------------------------|--------------------|--------------------|------------------------------|
| 1361      | Tetradecad | 3     | 0(0, 0A <sub>1</sub> ) | 0020E              | 0111E              | -5.88(21)                    |
| 1362      | Tetradecad | 5     | 2(0, 0A <sub>1</sub> ) | 0020E              | 0111E              | 0.0                          |
| 1363      | Tetradecad | 5     | 2(2, 0E)               | 0020E              | 0111E              | 0.0                          |
| 1364      | Tetradecad | 4     | 1(1, 0F <sub>1</sub> ) | 0020E              | 0111F <sub>1</sub> | 2.52(42) × 10 <sup>-1</sup>  |
| 1365      | Tetradecad | 5     | 2(2, 0F <sub>2</sub> ) | 0020E              | 0111F <sub>1</sub> | 0.0                          |
| 1366      | Tetradecad | 4     | 1(1, 0F <sub>1</sub> ) | 0020E              | 0111F <sub>2</sub> | 1.734(51)                    |
| 1367      | Tetradecad | 5     | 2(2, 0F <sub>2</sub> ) | 0020E              | 0111F <sub>2</sub> | 0.0                          |
| 1368      | Tetradecad | 5     | 2(2, 0E)               | 0020E              | 0111A <sub>1</sub> | 0.0                          |
| 1369      | Tetradecad | 3     | 0(0, 0A <sub>1</sub> ) | 0020E              | 0111E              | 0.0                          |
| 1370      | Tetradecad | 5     | 2(0, 0A <sub>1</sub> ) | 0020E              | 0111E              | 0.0                          |
| 1371      | Tetradecad | 5     | 2(2, 0E)               | 0020E              | 0111E              | -2.13(13) × 10 <sup>-2</sup> |
| 1372      | Tetradecad | 4     | 1(1, 0F <sub>1</sub> ) | 0020E              | 0111F <sub>1</sub> | -1.134(50)                   |
| 1373      | Tetradecad | 5     | 2(2, 0F <sub>2</sub> ) | 0020E              | 0111F <sub>1</sub> | 0.0                          |
| 1374      | Tetradecad | 4     | 1(1, 0F <sub>1</sub> ) | 0020E              | 0111F <sub>2</sub> | -2.009(30)                   |
| 1375      | Tetradecad | 5     | 2(2, 0F <sub>2</sub> ) | 0020E              | 0111F <sub>2</sub> | 0.0                          |
| 1376      | Tetradecad | 4     | 1(1, 0F <sub>1</sub> ) | 0020F <sub>2</sub> | 0111A <sub>2</sub> | -1.900(28)                   |
| 1377      | Tetradecad | 4     | 1(1, 0F <sub>1</sub> ) | 0020F <sub>2</sub> | 0111E              | 0.0                          |
| 1378      | Tetradecad | 5     | 2(2, 0F <sub>2</sub> ) | 0020F <sub>2</sub> | 0111E              | 0.0                          |
| 1379      | Tetradecad | 4     | 1(1, 0F <sub>1</sub> ) | 0020F <sub>2</sub> | 0111F <sub>1</sub> | 0.0                          |
| 1380      | Tetradecad | 5     | 2(2, 0E)               | 0020F <sub>2</sub> | 0111F <sub>1</sub> | 0.0                          |
| 1381      | Tetradecad | 5     | 2(2, 0F <sub>2</sub> ) | 0020F <sub>2</sub> | 0111F <sub>1</sub> | 0.0                          |
| 1382      | Tetradecad | 3     | 0(0, 0A <sub>1</sub> ) | 0020F <sub>2</sub> | 0111F <sub>2</sub> | -22.80(18)                   |
| 1383      | Tetradecad | 4     | 1(1, 0F <sub>1</sub> ) | 0020F <sub>2</sub> | 0111F <sub>2</sub> | 0.0                          |
| 1384      | Tetradecad | 5     | 2(0, 0A <sub>1</sub> ) | 0020F <sub>2</sub> | 0111F <sub>2</sub> | 0.0                          |
| 1385      | Tetradecad | 5     | 2(2, 0E)               | 0020F <sub>2</sub> | 0111F <sub>2</sub> | 2.76(14) × 10 <sup>-2</sup>  |
| 1386      | Tetradecad | 5     | 2(2, 0F <sub>2</sub> ) | 0020F <sub>2</sub> | 0111F <sub>2</sub> | 0.0                          |
| 1387      | Tetradecad | 5     | 2(2, 0F <sub>2</sub> ) | 0020F <sub>2</sub> | 0111A <sub>1</sub> | 0.0                          |
| 1388      | Tetradecad | 4     | 1(1, 0F <sub>1</sub> ) | 0020F <sub>2</sub> | 0111E              | 0.0                          |
| 1389      | Tetradecad | 5     | 2(2, 0F <sub>2</sub> ) | 0020F <sub>2</sub> | 0111E              | 0.0                          |
| 1390      | Tetradecad | 4     | 1(1, 0F <sub>1</sub> ) | 0020F <sub>2</sub> | 0111F <sub>1</sub> | -1.307(32)                   |
| 1391      | Tetradecad | 5     | 2(2, 0E)               | 0020F <sub>2</sub> | 0111F <sub>1</sub> | 0.0                          |
| 1392      | Tetradecad | 5     | 2(2, 0F <sub>2</sub> ) | 0020F <sub>2</sub> | 0111F <sub>1</sub> | 0.0                          |
| 1393      | Tetradecad | 3     | 0(0, 0A <sub>1</sub> ) | 0020F <sub>2</sub> | 0111F <sub>2</sub> | 23.72(17)                    |
| 1394      | Tetradecad | 4     | 1(1, 0F <sub>1</sub> ) | 0020F <sub>2</sub> | 0111F <sub>2</sub> | 0.0                          |
| 1395      | Tetradecad | 5     | 2(0, 0A <sub>1</sub> ) | 0020F <sub>2</sub> | 0111F <sub>2</sub> | 0.0                          |
| 1396      | Tetradecad | 5     | 2(2, 0E)               | 0020F <sub>2</sub> | 0111F <sub>2</sub> | 0.0                          |
| 1397      | Tetradecad | 5     | 2(2, 0F <sub>2</sub> ) | 0020F <sub>2</sub> | 0111F <sub>2</sub> | 0.0                          |
| 1398      | Tetradecad | 5     | 2(2, 0F <sub>2</sub> ) | 0020A <sub>1</sub> | 0012F <sub>2</sub> | 5.29(31) × 10 <sup>-2</sup>  |
| 1399      | Tetradecad | 4     | 1(1, 0F <sub>1</sub> ) | 0020A <sub>1</sub> | 0012F <sub>1</sub> | 0.0                          |
| 1400      | Tetradecad | 5     | 2(2, 0F <sub>2</sub> ) | 0020A <sub>1</sub> | 0012F <sub>2</sub> | 0.0                          |
| 1401      | Tetradecad | 3     | 0(0, 0A <sub>1</sub> ) | 0020A <sub>1</sub> | 0012A <sub>1</sub> | 0.0                          |
| 1402      | Tetradecad | 5     | 2(0, 0A <sub>1</sub> ) | 0020A <sub>1</sub> | 0012A <sub>1</sub> | 0.0                          |
| 1403      | Tetradecad | 5     | 2(2, 0E)               | 0020A <sub>1</sub> | 0012E              | 0.0                          |
| 1404      | Tetradecad | 4     | 1(1, 0F <sub>1</sub> ) | 0020A <sub>1</sub> | 0012F <sub>1</sub> | -2.300(84)                   |
| 1405      | Tetradecad | 5     | 2(2, 0F <sub>2</sub> ) | 0020A <sub>1</sub> | 0012F <sub>2</sub> | 0.0                          |
| 1406      | Tetradecad | 4     | 1(1, 0F <sub>1</sub> ) | 0020E              | 0012F <sub>2</sub> | 0.0                          |
| 1407      | Tetradecad | 5     | 2(2, 0F <sub>2</sub> ) | 0020E              | 0012F <sub>2</sub> | 0.0                          |
| 1408      | Tetradecad | 4     | 1(1, 0F <sub>1</sub> ) | 0020E              | 0012F <sub>1</sub> | 0.0                          |
| 1409      | Tetradecad | 5     | 2(2, 0F <sub>2</sub> ) | 0020E              | 0012F <sub>1</sub> | 0.0                          |
| 1410      | Tetradecad | 4     | 1(1, 0F <sub>1</sub> ) | 0020E              | 0012F <sub>2</sub> | 0.0                          |
| 1411      | Tetradecad | 5     | 2(2, 0F <sub>2</sub> ) | 0020E              | 0012F <sub>2</sub> | 3.58(33) × 10 <sup>-2</sup>  |
| 1412      | Tetradecad | 5     | 2(2, 0E)               | 0020E              | 0012A <sub>1</sub> | 0.0                          |
| 1413      | Tetradecad | 3     | 0(0, 0A <sub>1</sub> ) | 0020E              | 0012E              | -38.54(87)                   |
| 1414      | Tetradecad | 5     | 2(0, 0A <sub>1</sub> ) | 0020E              | 0012E              | 0.0                          |
| 1415      | Tetradecad | 5     | 2(2, 0E)               | 0020E              | 0012E              | 0.0                          |
| 1416      | Tetradecad | 4     | 1(1, 0F <sub>1</sub> ) | 0020E              | 0012F <sub>1</sub> | 0.0                          |
| 1417      | Tetradecad | 5     | 2(2, 0F <sub>2</sub> ) | 0020E              | 0012F <sub>1</sub> | 0.0                          |
| 1418      | Tetradecad | 4     | 1(1, 0F <sub>1</sub> ) | 0020E              | 0012F <sub>2</sub> | 0.0                          |
| 1419      | Tetradecad | 5     | 2(2, 0F <sub>2</sub> ) | 0020E              | 0012F <sub>2</sub> | 0.0                          |
| 1420      | Tetradecad | 3     | 0(0, 0A <sub>1</sub> ) | 0020F <sub>2</sub> | 0012F <sub>2</sub> | 13.17(37)                    |
| 1421      | Tetradecad | 4     | 1(1, 0F <sub>1</sub> ) | 0020F <sub>2</sub> | 0012F <sub>2</sub> | 0.0                          |
| 1422      | Tetradecad | 5     | 2(0, 0A <sub>1</sub> ) | 0020F <sub>2</sub> | 0012F <sub>2</sub> | 0.0                          |
| 1423      | Tetradecad | 5     | 2(2, 0E)               | 0020F <sub>2</sub> | 0012F <sub>2</sub> | 0.0                          |
| 1424      | Tetradecad | 5     | 2(2, 0F <sub>2</sub> ) | 0020F <sub>2</sub> | 0012F <sub>2</sub> | 0.0                          |
| 1425      | Tetradecad | 4     | 1(1, 0F <sub>1</sub> ) | 0020F <sub>2</sub> | 0012F <sub>1</sub> | 9.37(75) × 10 <sup>-1</sup>  |
| 1426      | Tetradecad | 5     | 2(2, 0E)               | 0020F <sub>2</sub> | 0012F <sub>1</sub> | 0.0                          |
| 1427      | Tetradecad | 5     | 2(2, 0F <sub>2</sub> ) | 0020F <sub>2</sub> | 0012F <sub>1</sub> | 0.0                          |
| 1428      | Tetradecad | 3     | 0(0, 0A <sub>1</sub> ) | 0020F <sub>2</sub> | 0012F <sub>2</sub> | -6.77(23)                    |
| 1429      | Tetradecad | 4     | 1(1, 0F <sub>1</sub> ) | 0020F <sub>2</sub> | 0012F <sub>2</sub> | 3.43(52) × 10 <sup>-1</sup>  |
| 1430      | Tetradecad | 5     | 2(0, 0A <sub>1</sub> ) | 0020F <sub>2</sub> | 0012F <sub>2</sub> | 0.0                          |
| 1431      | Tetradecad | 5     | 2(2, 0E)               | 0020F <sub>2</sub> | 0012F <sub>2</sub> | -6.83(20) × 10 <sup>-2</sup> |
| 1432      | Tetradecad | 5     | 2(2, 0F <sub>2</sub> ) | 0020F <sub>2</sub> | 0012F <sub>2</sub> | 0.0                          |
| 1433      | Tetradecad | 5     | 2(2, 0F <sub>2</sub> ) | 0020F <sub>2</sub> | 0012A <sub>1</sub> | 0.0                          |
| 1434      | Tetradecad | 4     | 1(1, 0F <sub>1</sub> ) | 0020F <sub>2</sub> | 0012E              | -1.585(60)                   |
| 1435      | Tetradecad | 5     | 2(2, 0F <sub>2</sub> ) | 0020F <sub>2</sub> | 0012E              | 0.0                          |
| 1436      | Tetradecad | 4     | 1(1, 0F <sub>1</sub> ) | 0020F <sub>2</sub> | 0012F <sub>1</sub> | -3.091(77)                   |
| 1437      | Tetradecad | 5     | 2(2, 0E)               | 0020F <sub>2</sub> | 0012F <sub>1</sub> | 0.0                          |
| 1438      | Tetradecad | 5     | 2(2, 0F <sub>2</sub> ) | 0020F <sub>2</sub> | 0012F <sub>1</sub> | 0.0                          |
| 1439      | Tetradecad | 3     | 0(0, 0A <sub>1</sub> ) | 0020F <sub>2</sub> | 0012F <sub>2</sub> | -57.88(44)                   |
| 1440      | Tetradecad | 4     | 1(1, 0F <sub>1</sub> ) | 0020F <sub>2</sub> | 0012F <sub>2</sub> | 2.812(80)                    |

Table I (continued).

| Parameter | Polyad     | Order | $\Omega(K, nC')$       | $\{s\} C_1$        | $\{s'\} C_2$       | Value / $\text{cm}^{-1}$   |
|-----------|------------|-------|------------------------|--------------------|--------------------|----------------------------|
| 1441      | Tetradecad | 5     | 2(0, 0A <sub>1</sub> ) | 0020F <sub>2</sub> | 0012F <sub>2</sub> | 0.0                        |
| 1442      | Tetradecad | 5     | 2(2, 0E)               | 0020F <sub>2</sub> | 0012F <sub>2</sub> | 0.0                        |
| 1443      | Tetradecad | 5     | 2(2, 0F <sub>2</sub> ) | 0020F <sub>2</sub> | 0012F <sub>2</sub> | 0.0                        |
| 1444      | Tetradecad | 4     | 0(0, 0A <sub>1</sub> ) | 0020A <sub>1</sub> | 0400A <sub>1</sub> | -42.6(1.1)                 |
| 1445      | Tetradecad | 4     | 0(0, 0A <sub>1</sub> ) | 0020E              | 0400E              | -7.61(25)                  |
| 1446      | Tetradecad | 4     | 0(0, 0A <sub>1</sub> ) | 0020E              | 0400E              | 0.0                        |
| 1447      | Tetradecad | 5     | 1(1, 0F <sub>1</sub> ) | 0020F <sub>2</sub> | 0400E              | 0.0                        |
| 1448      | Tetradecad | 5     | 1(1, 0F <sub>1</sub> ) | 0020F <sub>2</sub> | 0400E              | 0.0                        |
| 1449      | Tetradecad | 5     | 1(1, 0F <sub>1</sub> ) | 0020A <sub>1</sub> | 0301F <sub>1</sub> | 0.0                        |
| 1450      | Tetradecad | 5     | 1(1, 0F <sub>1</sub> ) | 0020A <sub>1</sub> | 0301F <sub>1</sub> | 3.572(90)                  |
| 1451      | Tetradecad | 5     | 1(1, 0F <sub>1</sub> ) | 0020E              | 0301F <sub>1</sub> | 0.0                        |
| 1452      | Tetradecad | 5     | 1(1, 0F <sub>1</sub> ) | 0020E              | 0301F <sub>2</sub> | 0.0                        |
| 1453      | Tetradecad | 5     | 1(1, 0F <sub>1</sub> ) | 0020E              | 0301F <sub>2</sub> | 0.0                        |
| 1454      | Tetradecad | 5     | 1(1, 0F <sub>1</sub> ) | 0020E              | 0301F <sub>1</sub> | 0.0                        |
| 1455      | Tetradecad | 5     | 1(1, 0F <sub>1</sub> ) | 0020F <sub>2</sub> | 0301F <sub>1</sub> | 0.0                        |
| 1456      | Tetradecad | 4     | 0(0, 0A <sub>1</sub> ) | 0020F <sub>2</sub> | 0301F <sub>2</sub> | 0.0                        |
| 1457      | Tetradecad | 5     | 1(1, 0F <sub>1</sub> ) | 0020F <sub>2</sub> | 0301F <sub>2</sub> | 0.0                        |
| 1458      | Tetradecad | 4     | 0(0, 0A <sub>1</sub> ) | 0020F <sub>2</sub> | 0301F <sub>2</sub> | -3.09(11)                  |
| 1459      | Tetradecad | 5     | 1(1, 0F <sub>1</sub> ) | 0020F <sub>2</sub> | 0301F <sub>2</sub> | -2.45(18) $\times 10^{-1}$ |
| 1460      | Tetradecad | 5     | 1(1, 0F <sub>1</sub> ) | 0020F <sub>2</sub> | 0301F <sub>1</sub> | 3.049(76) $\times 10^{-1}$ |
| 1461      | Tetradecad | 4     | 0(0, 0A <sub>1</sub> ) | 0020A <sub>1</sub> | 0202A <sub>1</sub> | 12.81(59)                  |
| 1462      | Tetradecad | 4     | 0(0, 0A <sub>1</sub> ) | 0020A <sub>1</sub> | 0202A <sub>1</sub> | -2.44(47)                  |
| 1463      | Tetradecad | 5     | 1(1, 0F <sub>1</sub> ) | 0020A <sub>1</sub> | 0202F <sub>1</sub> | 9.37(59) $\times 10^{-1}$  |
| 1464      | Tetradecad | 4     | 0(0, 0A <sub>1</sub> ) | 0020E              | 0202E              | 7.22(66)                   |
| 1465      | Tetradecad | 5     | 1(1, 0F <sub>1</sub> ) | 0020E              | 0202F <sub>2</sub> | 0.0                        |
| 1466      | Tetradecad | 4     | 0(0, 0A <sub>1</sub> ) | 0020E              | 0202E              | -19.52(46)                 |
| 1467      | Tetradecad | 4     | 0(0, 0A <sub>1</sub> ) | 0020E              | 0202E              | 0.0                        |
| 1468      | Tetradecad | 5     | 1(1, 0F <sub>1</sub> ) | 0020E              | 0202F <sub>1</sub> | 0.0                        |
| 1469      | Tetradecad | 5     | 1(1, 0F <sub>1</sub> ) | 0020E              | 0202F <sub>2</sub> | 0.0                        |
| 1470      | Tetradecad | 5     | 1(1, 0F <sub>1</sub> ) | 0020F <sub>2</sub> | 0202E              | 0.0                        |
| 1471      | Tetradecad | 4     | 0(0, 0A <sub>1</sub> ) | 0020F <sub>2</sub> | 0202F <sub>2</sub> | 1.26(20)                   |
| 1472      | Tetradecad | 5     | 1(1, 0F <sub>1</sub> ) | 0020F <sub>2</sub> | 0202F <sub>2</sub> | 0.0                        |
| 1473      | Tetradecad | 5     | 1(1, 0F <sub>1</sub> ) | 0020F <sub>2</sub> | 0202E              | 0.0                        |
| 1474      | Tetradecad | 5     | 1(1, 0F <sub>1</sub> ) | 0020F <sub>2</sub> | 0202A <sub>2</sub> | 0.0                        |
| 1475      | Tetradecad | 5     | 1(1, 0F <sub>1</sub> ) | 0020F <sub>2</sub> | 0202E              | 0.0                        |
| 1476      | Tetradecad | 5     | 1(1, 0F <sub>1</sub> ) | 0020F <sub>2</sub> | 0202F <sub>1</sub> | 0.0                        |
| 1477      | Tetradecad | 4     | 0(0, 0A <sub>1</sub> ) | 0020F <sub>2</sub> | 0202F <sub>2</sub> | 0.0                        |
| 1478      | Tetradecad | 5     | 1(1, 0F <sub>1</sub> ) | 0020F <sub>2</sub> | 0202F <sub>2</sub> | 0.0                        |
| 1479      | Tetradecad | 5     | 1(1, 0F <sub>1</sub> ) | 0020A <sub>1</sub> | 0103F <sub>1</sub> | 0.0                        |
| 1480      | Tetradecad | 5     | 1(1, 0F <sub>1</sub> ) | 0020A <sub>1</sub> | 0103F <sub>1</sub> | 0.0                        |
| 1481      | Tetradecad | 5     | 1(1, 0F <sub>1</sub> ) | 0020A <sub>1</sub> | 0103F <sub>1</sub> | 0.0                        |
| 1482      | Tetradecad | 5     | 1(1, 0F <sub>1</sub> ) | 0020E              | 0103F <sub>1</sub> | 0.0                        |
| 1483      | Tetradecad | 5     | 1(1, 0F <sub>1</sub> ) | 0020E              | 0103F <sub>2</sub> | 0.0                        |
| 1484      | Tetradecad | 4     | 0(0, 0A <sub>1</sub> ) | 0020E              | 0103E              | 0.0                        |
| 1485      | Tetradecad | 5     | 1(1, 0F <sub>1</sub> ) | 0020E              | 0103F <sub>1</sub> | 0.0                        |
| 1486      | Tetradecad | 5     | 1(1, 0F <sub>1</sub> ) | 0020E              | 0103F <sub>2</sub> | 0.0                        |
| 1487      | Tetradecad | 5     | 1(1, 0F <sub>1</sub> ) | 0020E              | 0103F <sub>1</sub> | 0.0                        |
| 1488      | Tetradecad | 5     | 1(1, 0F <sub>1</sub> ) | 0020E              | 0103F <sub>2</sub> | 0.0                        |
| 1489      | Tetradecad | 5     | 1(1, 0F <sub>1</sub> ) | 0020F <sub>2</sub> | 0103F <sub>1</sub> | 0.0                        |
| 1490      | Tetradecad | 4     | 0(0, 0A <sub>1</sub> ) | 0020F <sub>2</sub> | 0103F <sub>2</sub> | 0.0                        |
| 1491      | Tetradecad | 5     | 1(1, 0F <sub>1</sub> ) | 0020F <sub>2</sub> | 0103F <sub>2</sub> | 0.0                        |
| 1492      | Tetradecad | 5     | 1(1, 0F <sub>1</sub> ) | 0020F <sub>2</sub> | 0103E              | 0.0                        |
| 1493      | Tetradecad | 5     | 1(1, 0F <sub>1</sub> ) | 0020F <sub>2</sub> | 0103F <sub>1</sub> | 0.0                        |
| 1494      | Tetradecad | 4     | 0(0, 0A <sub>1</sub> ) | 0020F <sub>2</sub> | 0103F <sub>2</sub> | 0.0                        |
| 1495      | Tetradecad | 5     | 1(1, 0F <sub>1</sub> ) | 0020F <sub>2</sub> | 0103F <sub>2</sub> | 0.0                        |
| 1496      | Tetradecad | 5     | 1(1, 0F <sub>1</sub> ) | 0020F <sub>2</sub> | 0103F <sub>1</sub> | 0.0                        |
| 1497      | Tetradecad | 4     | 0(0, 0A <sub>1</sub> ) | 0020F <sub>2</sub> | 0103F <sub>2</sub> | 0.0                        |
| 1498      | Tetradecad | 5     | 1(1, 0F <sub>1</sub> ) | 0020F <sub>2</sub> | 0103F <sub>2</sub> | 0.0                        |
| 1499      | Tetradecad | 4     | 0(0, 0A <sub>1</sub> ) | 0020A <sub>1</sub> | 0004A <sub>1</sub> | -27.28(99)                 |
| 1500      | Tetradecad | 4     | 0(0, 0A <sub>1</sub> ) | 0020A <sub>1</sub> | 0004A <sub>1</sub> | 4.3(1.0)                   |
| 1501      | Tetradecad | 5     | 1(1, 0F <sub>1</sub> ) | 0020A <sub>1</sub> | 0004F <sub>1</sub> | 0.0                        |
| 1502      | Tetradecad | 4     | 0(0, 0A <sub>1</sub> ) | 0020E              | 0004E              | 0.0                        |
| 1503      | Tetradecad | 5     | 1(1, 0F <sub>1</sub> ) | 0020E              | 0004F <sub>2</sub> | 0.0                        |
| 1504      | Tetradecad | 4     | 0(0, 0A <sub>1</sub> ) | 0020E              | 0004E              | 0.0                        |
| 1505      | Tetradecad | 5     | 1(1, 0F <sub>1</sub> ) | 0020E              | 0004F <sub>1</sub> | 0.0                        |
| 1506      | Tetradecad | 5     | 1(1, 0F <sub>1</sub> ) | 0020E              | 0004F <sub>2</sub> | 0.0                        |
| 1507      | Tetradecad | 5     | 1(1, 0F <sub>1</sub> ) | 0020F <sub>2</sub> | 0004E              | 0.0                        |
| 1508      | Tetradecad | 4     | 0(0, 0A <sub>1</sub> ) | 0020F <sub>2</sub> | 0004F <sub>2</sub> | -20.95(15)                 |
| 1509      | Tetradecad | 5     | 1(1, 0F <sub>1</sub> ) | 0020F <sub>2</sub> | 0004F <sub>2</sub> | 0.0                        |
| 1510      | Tetradecad | 5     | 1(1, 0F <sub>1</sub> ) | 0020F <sub>2</sub> | 0004E              | 0.0                        |
| 1511      | Tetradecad | 5     | 1(1, 0F <sub>1</sub> ) | 0020F <sub>2</sub> | 0004F <sub>1</sub> | 0.0                        |
| 1512      | Tetradecad | 4     | 0(0, 0A <sub>1</sub> ) | 0020F <sub>2</sub> | 0004F <sub>2</sub> | -1.10(38)                  |
| 1513      | Tetradecad | 5     | 1(1, 0F <sub>1</sub> ) | 0020F <sub>2</sub> | 0004F <sub>2</sub> | 0.0                        |
| 1514      | Tetradecad | 4     | 0(0, 0A <sub>1</sub> ) | 0210F <sub>2</sub> | 0210F <sub>2</sub> | 4.7(2.1) $\times 10^{-1}$  |
| 1515      | Tetradecad | 5     | 1(1, 0F <sub>1</sub> ) | 0210F <sub>2</sub> | 0210F <sub>2</sub> | 0.0                        |
| 1516      | Tetradecad | 5     | 1(1, 0F <sub>1</sub> ) | 0210F <sub>2</sub> | 0210F <sub>1</sub> | 0.0                        |
| 1517      | Tetradecad | 4     | 0(0, 0A <sub>1</sub> ) | 0210F <sub>2</sub> | 0210F <sub>2</sub> | 0.0                        |
| 1518      | Tetradecad | 5     | 1(1, 0F <sub>1</sub> ) | 0210F <sub>2</sub> | 0210F <sub>2</sub> | 0.0                        |
| 1519      | Tetradecad | 4     | 0(0, 0A <sub>1</sub> ) | 0210F <sub>1</sub> | 0210F <sub>1</sub> | 0.0                        |
| 1520      | Tetradecad | 5     | 1(1, 0F <sub>1</sub> ) | 0210F <sub>1</sub> | 0210F <sub>1</sub> | 0.0                        |



Table I (continued).

| Parameter | Polyad     | Order | $\Omega(K, nC)$        | $\{s\} C_1$        | $\{s'\} C_2$       | Value / $\text{cm}^{-1}$   |
|-----------|------------|-------|------------------------|--------------------|--------------------|----------------------------|
| 1521      | Tetradecad | 5     | 1(1, 0F <sub>1</sub> ) | 0210F <sub>1</sub> | 0210F <sub>2</sub> | $-4.6(4.2) \times 10^{-3}$ |
| 1522      | Tetradecad | 4     | 0(0, 0A <sub>1</sub> ) | 0210F <sub>2</sub> | 0210F <sub>2</sub> | -1.076(42)                 |
| 1523      | Tetradecad | 5     | 1(1, 0F <sub>1</sub> ) | 0210F <sub>2</sub> | 0210F <sub>2</sub> | 0.0                        |
| 1524      | Tetradecad | 5     | 1(1, 0F <sub>1</sub> ) | 0210F <sub>2</sub> | 0111A <sub>2</sub> | 0.0                        |
| 1525      | Tetradecad | 5     | 1(1, 0F <sub>1</sub> ) | 0210F <sub>2</sub> | 0111E              | 0.0                        |
| 1526      | Tetradecad | 5     | 1(1, 0F <sub>1</sub> ) | 0210F <sub>2</sub> | 0111F <sub>1</sub> | 0.0                        |
| 1527      | Tetradecad | 4     | 0(0, 0A <sub>1</sub> ) | 0210F <sub>2</sub> | 0111F <sub>2</sub> | 0.0                        |
| 1528      | Tetradecad | 5     | 1(1, 0F <sub>1</sub> ) | 0210F <sub>2</sub> | 0111F <sub>2</sub> | 0.0                        |
| 1529      | Tetradecad | 5     | 1(1, 0F <sub>1</sub> ) | 0210F <sub>2</sub> | 0111E              | 0.0                        |
| 1530      | Tetradecad | 5     | 1(1, 0F <sub>1</sub> ) | 0210F <sub>2</sub> | 0111F <sub>1</sub> | $1.05(14) \times 10^{-1}$  |
| 1531      | Tetradecad | 4     | 0(0, 0A <sub>1</sub> ) | 0210F <sub>2</sub> | 0111F <sub>2</sub> | 0.0                        |
| 1532      | Tetradecad | 5     | 1(1, 0F <sub>1</sub> ) | 0210F <sub>2</sub> | 0111F <sub>2</sub> | 0.0                        |
| 1533      | Tetradecad | 5     | 1(1, 0F <sub>1</sub> ) | 0210F <sub>1</sub> | 0111E              | 0.0                        |
| 1534      | Tetradecad | 4     | 0(0, 0A <sub>1</sub> ) | 0210F <sub>1</sub> | 0111F <sub>1</sub> | -1.641(55)                 |
| 1535      | Tetradecad | 5     | 1(1, 0F <sub>1</sub> ) | 0210F <sub>1</sub> | 0111F <sub>1</sub> | 0.0                        |
| 1536      | Tetradecad | 5     | 1(1, 0F <sub>1</sub> ) | 0210F <sub>1</sub> | 0111F <sub>2</sub> | 0.0                        |
| 1537      | Tetradecad | 5     | 1(1, 0F <sub>1</sub> ) | 0210F <sub>1</sub> | 0111A <sub>1</sub> | 0.0                        |
| 1538      | Tetradecad | 5     | 1(1, 0F <sub>1</sub> ) | 0210F <sub>1</sub> | 0111E              | 0.0                        |
| 1539      | Tetradecad | 4     | 0(0, 0A <sub>1</sub> ) | 0210F <sub>1</sub> | 0111F <sub>1</sub> | 4.324(61)                  |
| 1540      | Tetradecad | 5     | 1(1, 0F <sub>1</sub> ) | 0210F <sub>1</sub> | 0111F <sub>1</sub> | 0.0                        |
| 1541      | Tetradecad | 5     | 1(1, 0F <sub>1</sub> ) | 0210F <sub>1</sub> | 0111F <sub>2</sub> | 0.0                        |
| 1542      | Tetradecad | 5     | 1(1, 0F <sub>1</sub> ) | 0210F <sub>2</sub> | 0111A <sub>2</sub> | 0.0                        |
| 1543      | Tetradecad | 5     | 1(1, 0F <sub>1</sub> ) | 0210F <sub>2</sub> | 0111E              | 0.0                        |
| 1544      | Tetradecad | 5     | 1(1, 0F <sub>1</sub> ) | 0210F <sub>2</sub> | 0111F <sub>1</sub> | 0.0                        |
| 1545      | Tetradecad | 4     | 0(0, 0A <sub>1</sub> ) | 0210F <sub>2</sub> | 0111F <sub>2</sub> | -3.158(55)                 |
| 1546      | Tetradecad | 5     | 1(1, 0F <sub>1</sub> ) | 0210F <sub>2</sub> | 0111F <sub>2</sub> | 0.0                        |
| 1547      | Tetradecad | 5     | 1(1, 0F <sub>1</sub> ) | 0210F <sub>2</sub> | 0111E              | 0.0                        |
| 1548      | Tetradecad | 5     | 1(1, 0F <sub>1</sub> ) | 0210F <sub>2</sub> | 0111F <sub>1</sub> | 0.0                        |
| 1549      | Tetradecad | 4     | 0(0, 0A <sub>1</sub> ) | 0210F <sub>2</sub> | 0111F <sub>2</sub> | 0.0                        |
| 1550      | Tetradecad | 5     | 1(1, 0F <sub>1</sub> ) | 0210F <sub>2</sub> | 0111F <sub>2</sub> | 0.0                        |
| 1551      | Tetradecad | 4     | 0(0, 0A <sub>1</sub> ) | 0210F <sub>2</sub> | 0012F <sub>2</sub> | 16.61(33)                  |
| 1552      | Tetradecad | 5     | 1(1, 0F <sub>1</sub> ) | 0210F <sub>2</sub> | 0012F <sub>2</sub> | 0.0                        |
| 1553      | Tetradecad | 5     | 1(1, 0F <sub>1</sub> ) | 0210F <sub>2</sub> | 0012F <sub>1</sub> | 0.0                        |
| 1554      | Tetradecad | 4     | 0(0, 0A <sub>1</sub> ) | 0210F <sub>2</sub> | 0012F <sub>2</sub> | 0.0                        |
| 1555      | Tetradecad | 5     | 1(1, 0F <sub>1</sub> ) | 0210F <sub>2</sub> | 0012F <sub>2</sub> | 0.0                        |
| 1556      | Tetradecad | 5     | 1(1, 0F <sub>1</sub> ) | 0210F <sub>2</sub> | 0012E              | 1.064(49)                  |
| 1557      | Tetradecad | 5     | 1(1, 0F <sub>1</sub> ) | 0210F <sub>2</sub> | 0012F <sub>1</sub> | 0.0                        |
| 1558      | Tetradecad | 4     | 0(0, 0A <sub>1</sub> ) | 0210F <sub>2</sub> | 0012F <sub>2</sub> | 7.26(29)                   |
| 1559      | Tetradecad | 5     | 1(1, 0F <sub>1</sub> ) | 0210F <sub>2</sub> | 0012F <sub>2</sub> | 0.0                        |
| 1560      | Tetradecad | 5     | 1(1, 0F <sub>1</sub> ) | 0210F <sub>1</sub> | 0012F <sub>2</sub> | 0.0                        |
| 1561      | Tetradecad | 4     | 0(0, 0A <sub>1</sub> ) | 0210F <sub>1</sub> | 0012F <sub>1</sub> | 0.0                        |
| 1562      | Tetradecad | 5     | 1(1, 0F <sub>1</sub> ) | 0210F <sub>1</sub> | 0012F <sub>1</sub> | 0.0                        |
| 1563      | Tetradecad | 5     | 1(1, 0F <sub>1</sub> ) | 0210F <sub>1</sub> | 0012F <sub>2</sub> | 0.0                        |
| 1564      | Tetradecad | 5     | 1(1, 0F <sub>1</sub> ) | 0210F <sub>1</sub> | 0012A <sub>1</sub> | 0.0                        |
| 1565      | Tetradecad | 5     | 1(1, 0F <sub>1</sub> ) | 0210F <sub>1</sub> | 0012E              | 0.0                        |
| 1566      | Tetradecad | 4     | 0(0, 0A <sub>1</sub> ) | 0210F <sub>1</sub> | 0012F <sub>1</sub> | $4.5(2.8) \times 10^{-1}$  |
| 1567      | Tetradecad | 5     | 1(1, 0F <sub>1</sub> ) | 0210F <sub>1</sub> | 0012F <sub>1</sub> | 0.0                        |
| 1568      | Tetradecad | 5     | 1(1, 0F <sub>1</sub> ) | 0210F <sub>1</sub> | 0012F <sub>2</sub> | 0.0                        |
| 1569      | Tetradecad | 4     | 0(0, 0A <sub>1</sub> ) | 0210F <sub>2</sub> | 0012F <sub>2</sub> | -13.80(37)                 |
| 1570      | Tetradecad | 5     | 1(1, 0F <sub>1</sub> ) | 0210F <sub>2</sub> | 0012F <sub>2</sub> | 0.0                        |
| 1571      | Tetradecad | 5     | 1(1, 0F <sub>1</sub> ) | 0210F <sub>2</sub> | 0012F <sub>1</sub> | 0.0                        |
| 1572      | Tetradecad | 4     | 0(0, 0A <sub>1</sub> ) | 0210F <sub>2</sub> | 0012F <sub>2</sub> | 4.24(21)                   |
| 1573      | Tetradecad | 5     | 1(1, 0F <sub>1</sub> ) | 0210F <sub>2</sub> | 0012F <sub>2</sub> | 0.0                        |
| 1574      | Tetradecad | 5     | 1(1, 0F <sub>1</sub> ) | 0210F <sub>2</sub> | 0012E              | 0.0                        |
| 1575      | Tetradecad | 5     | 1(1, 0F <sub>1</sub> ) | 0210F <sub>2</sub> | 0012F <sub>1</sub> | 0.0                        |
| 1576      | Tetradecad | 4     | 0(0, 0A <sub>1</sub> ) | 0210F <sub>2</sub> | 0012F <sub>2</sub> | 0.0                        |
| 1577      | Tetradecad | 5     | 1(1, 0F <sub>1</sub> ) | 0210F <sub>2</sub> | 0012F <sub>2</sub> | 0.0                        |
| 1578      | Tetradecad | 5     | 0(0, 0A <sub>1</sub> ) | 0210F <sub>2</sub> | 0301F <sub>2</sub> | 0.0                        |
| 1579      | Tetradecad | 5     | 0(0, 0A <sub>1</sub> ) | 0210F <sub>2</sub> | 0301F <sub>2</sub> | 0.0                        |
| 1580      | Tetradecad | 5     | 0(0, 0A <sub>1</sub> ) | 0210F <sub>1</sub> | 0301F <sub>1</sub> | 0.0                        |
| 1581      | Tetradecad | 5     | 0(0, 0A <sub>1</sub> ) | 0210F <sub>1</sub> | 0301F <sub>1</sub> | 0.0                        |
| 1582      | Tetradecad | 5     | 0(0, 0A <sub>1</sub> ) | 0210F <sub>2</sub> | 0301F <sub>2</sub> | 0.0                        |
| 1583      | Tetradecad | 5     | 0(0, 0A <sub>1</sub> ) | 0210F <sub>2</sub> | 0301F <sub>2</sub> | 0.0                        |
| 1584      | Tetradecad | 5     | 0(0, 0A <sub>1</sub> ) | 0210F <sub>2</sub> | 0202F <sub>2</sub> | 0.0                        |
| 1585      | Tetradecad | 5     | 0(0, 0A <sub>1</sub> ) | 0210F <sub>2</sub> | 0202F <sub>2</sub> | 0.0                        |
| 1586      | Tetradecad | 5     | 0(0, 0A <sub>1</sub> ) | 0210F <sub>1</sub> | 0202F <sub>1</sub> | 0.0                        |
| 1587      | Tetradecad | 5     | 0(0, 0A <sub>1</sub> ) | 0210F <sub>2</sub> | 0202F <sub>2</sub> | 0.0                        |
| 1588      | Tetradecad | 5     | 0(0, 0A <sub>1</sub> ) | 0210F <sub>2</sub> | 0202F <sub>2</sub> | 0.0                        |
| 1589      | Tetradecad | 5     | 0(0, 0A <sub>1</sub> ) | 0210F <sub>2</sub> | 0103F <sub>2</sub> | 0.0                        |
| 1590      | Tetradecad | 5     | 0(0, 0A <sub>1</sub> ) | 0210F <sub>2</sub> | 0103F <sub>2</sub> | 0.0                        |
| 1591      | Tetradecad | 5     | 0(0, 0A <sub>1</sub> ) | 0210F <sub>2</sub> | 0103F <sub>2</sub> | 0.0                        |
| 1592      | Tetradecad | 5     | 0(0, 0A <sub>1</sub> ) | 0210F <sub>1</sub> | 0103F <sub>1</sub> | 0.0                        |
| 1593      | Tetradecad | 5     | 0(0, 0A <sub>1</sub> ) | 0210F <sub>1</sub> | 0103F <sub>1</sub> | 0.0                        |
| 1594      | Tetradecad | 5     | 0(0, 0A <sub>1</sub> ) | 0210F <sub>1</sub> | 0103F <sub>1</sub> | 0.0                        |
| 1595      | Tetradecad | 5     | 0(0, 0A <sub>1</sub> ) | 0210F <sub>2</sub> | 0103F <sub>2</sub> | 0.0                        |
| 1596      | Tetradecad | 5     | 0(0, 0A <sub>1</sub> ) | 0210F <sub>2</sub> | 0103F <sub>2</sub> | 0.0                        |
| 1597      | Tetradecad | 5     | 0(0, 0A <sub>1</sub> ) | 0210F <sub>2</sub> | 0103F <sub>2</sub> | 0.0                        |
| 1598      | Tetradecad | 5     | 0(0, 0A <sub>1</sub> ) | 0210F <sub>2</sub> | 0004F <sub>2</sub> | 0.0                        |
| 1599      | Tetradecad | 5     | 0(0, 0A <sub>1</sub> ) | 0210F <sub>2</sub> | 0004F <sub>2</sub> | 0.0                        |
| 1600      | Tetradecad | 5     | 0(0, 0A <sub>1</sub> ) | 0210F <sub>1</sub> | 0004F <sub>1</sub> | 0.0                        |

Table I (continued).

| Parameter | Polyad     | Order | $\Omega(K, nC)$        | $\{s\} C_1$        | $\{s'\} C_2$       | Value / $\text{cm}^{-1}$     |
|-----------|------------|-------|------------------------|--------------------|--------------------|------------------------------|
| 1601      | Tetradecad | 5     | 0(0, 0A <sub>1</sub> ) | 0210F <sub>2</sub> | 0004F <sub>2</sub> | 0.0                          |
| 1602      | Tetradecad | 5     | 0(0, 0A <sub>1</sub> ) | 0210F <sub>2</sub> | 0004F <sub>2</sub> | 0.0                          |
| 1603      | Tetradecad | 4     | 0(0, 0A <sub>1</sub> ) | 0111A <sub>2</sub> | 0111A <sub>2</sub> | -8.95(39) × 10 <sup>-1</sup> |
| 1604      | Tetradecad | 5     | 1(1, 0F <sub>1</sub> ) | 0111A <sub>2</sub> | 0111F <sub>2</sub> | 0.0                          |
| 1605      | Tetradecad | 5     | 1(1, 0F <sub>1</sub> ) | 0111A <sub>2</sub> | 0111F <sub>2</sub> | 0.0                          |
| 1606      | Tetradecad | 4     | 0(0, 0A <sub>1</sub> ) | 0111E              | 0111E              | 0.0                          |
| 1607      | Tetradecad | 5     | 1(1, 0F <sub>1</sub> ) | 0111E              | 0111F <sub>1</sub> | 0.0                          |
| 1608      | Tetradecad | 5     | 1(1, 0F <sub>1</sub> ) | 0111E              | 0111F <sub>2</sub> | 0.0                          |
| 1609      | Tetradecad | 4     | 0(0, 0A <sub>1</sub> ) | 0111E              | 0111E              | 0.0                          |
| 1610      | Tetradecad | 5     | 1(1, 0F <sub>1</sub> ) | 0111E              | 0111F <sub>1</sub> | 0.0                          |
| 1611      | Tetradecad | 5     | 1(1, 0F <sub>1</sub> ) | 0111E              | 0111F <sub>2</sub> | 0.0                          |
| 1612      | Tetradecad | 4     | 0(0, 0A <sub>1</sub> ) | 0111F <sub>1</sub> | 0111F <sub>1</sub> | -1.109(21)                   |
| 1613      | Tetradecad | 5     | 1(1, 0F <sub>1</sub> ) | 0111F <sub>1</sub> | 0111F <sub>1</sub> | 0.0                          |
| 1614      | Tetradecad | 5     | 1(1, 0F <sub>1</sub> ) | 0111F <sub>1</sub> | 0111F <sub>2</sub> | 0.0                          |
| 1615      | Tetradecad | 5     | 1(1, 0F <sub>1</sub> ) | 0111F <sub>1</sub> | 0111A <sub>1</sub> | 0.0                          |
| 1616      | Tetradecad | 5     | 1(1, 0F <sub>1</sub> ) | 0111F <sub>1</sub> | 0111E              | 0.0                          |
| 1617      | Tetradecad | 4     | 0(0, 0A <sub>1</sub> ) | 0111F <sub>1</sub> | 0111F <sub>1</sub> | 3.4(1.4) × 10 <sup>-2</sup>  |
| 1618      | Tetradecad | 5     | 1(1, 0F <sub>1</sub> ) | 0111F <sub>1</sub> | 0111F <sub>1</sub> | 0.0                          |
| 1619      | Tetradecad | 5     | 1(1, 0F <sub>1</sub> ) | 0111F <sub>1</sub> | 0111F <sub>2</sub> | 0.0                          |
| 1620      | Tetradecad | 4     | 0(0, 0A <sub>1</sub> ) | 0111F <sub>2</sub> | 0111F <sub>2</sub> | 0.0                          |
| 1621      | Tetradecad | 5     | 1(1, 0F <sub>1</sub> ) | 0111F <sub>2</sub> | 0111F <sub>2</sub> | 0.0                          |
| 1622      | Tetradecad | 5     | 1(1, 0F <sub>1</sub> ) | 0111F <sub>2</sub> | 0111E              | 0.0                          |
| 1623      | Tetradecad | 5     | 1(1, 0F <sub>1</sub> ) | 0111F <sub>2</sub> | 0111F <sub>1</sub> | 0.0                          |
| 1624      | Tetradecad | 4     | 0(0, 0A <sub>1</sub> ) | 0111F <sub>2</sub> | 0111F <sub>2</sub> | -2.99(32) × 10 <sup>-1</sup> |
| 1625      | Tetradecad | 5     | 1(1, 0F <sub>1</sub> ) | 0111F <sub>2</sub> | 0111F <sub>2</sub> | 0.0                          |
| 1626      | Tetradecad | 4     | 0(0, 0A <sub>1</sub> ) | 0111A <sub>1</sub> | 0111A <sub>1</sub> | 0.0                          |
| 1627      | Tetradecad | 5     | 1(1, 0F <sub>1</sub> ) | 0111A <sub>1</sub> | 0111F <sub>1</sub> | 0.0                          |
| 1628      | Tetradecad | 4     | 0(0, 0A <sub>1</sub> ) | 0111E              | 0111E              | 0.0                          |
| 1629      | Tetradecad | 5     | 1(1, 0F <sub>1</sub> ) | 0111E              | 0111F <sub>1</sub> | -4.79(56) × 10 <sup>-2</sup> |
| 1630      | Tetradecad | 5     | 1(1, 0F <sub>1</sub> ) | 0111E              | 0111F <sub>2</sub> | 0.0                          |
| 1631      | Tetradecad | 4     | 0(0, 0A <sub>1</sub> ) | 0111F <sub>1</sub> | 0111F <sub>1</sub> | 2.125(28)                    |
| 1632      | Tetradecad | 5     | 1(1, 0F <sub>1</sub> ) | 0111F <sub>1</sub> | 0111F <sub>1</sub> | 0.0                          |
| 1633      | Tetradecad | 5     | 1(1, 0F <sub>1</sub> ) | 0111F <sub>1</sub> | 0111F <sub>2</sub> | 0.0                          |
| 1634      | Tetradecad | 4     | 0(0, 0A <sub>1</sub> ) | 0111F <sub>2</sub> | 0111F <sub>2</sub> | 0.0                          |
| 1635      | Tetradecad | 5     | 1(1, 0F <sub>1</sub> ) | 0111F <sub>2</sub> | 0111F <sub>2</sub> | 2.25(11) × 10 <sup>-1</sup>  |
| 1636      | Tetradecad | 5     | 1(1, 0F <sub>1</sub> ) | 0111A <sub>2</sub> | 0012F <sub>2</sub> | 1.604(28)                    |
| 1637      | Tetradecad | 5     | 1(1, 0F <sub>1</sub> ) | 0111A <sub>2</sub> | 0012F <sub>2</sub> | 0.0                          |
| 1638      | Tetradecad | 5     | 1(1, 0F <sub>1</sub> ) | 0111A <sub>2</sub> | 0012F <sub>2</sub> | 0.0                          |
| 1639      | Tetradecad | 5     | 1(1, 0F <sub>1</sub> ) | 0111E              | 0012F <sub>2</sub> | 4.27(21) × 10 <sup>-1</sup>  |
| 1640      | Tetradecad | 5     | 1(1, 0F <sub>1</sub> ) | 0111E              | 0012F <sub>1</sub> | 0.0                          |
| 1641      | Tetradecad | 5     | 1(1, 0F <sub>1</sub> ) | 0111E              | 0012F <sub>2</sub> | 0.0                          |
| 1642      | Tetradecad | 4     | 0(0, 0A <sub>1</sub> ) | 0111E              | 0012E              | 5.41(13)                     |
| 1643      | Tetradecad | 5     | 1(1, 0F <sub>1</sub> ) | 0111E              | 0012F <sub>1</sub> | 0.0                          |
| 1644      | Tetradecad | 5     | 1(1, 0F <sub>1</sub> ) | 0111E              | 0012F <sub>2</sub> | 0.0                          |
| 1645      | Tetradecad | 5     | 1(1, 0F <sub>1</sub> ) | 0111F <sub>1</sub> | 0012F <sub>2</sub> | 0.0                          |
| 1646      | Tetradecad | 4     | 0(0, 0A <sub>1</sub> ) | 0111F <sub>1</sub> | 0012F <sub>1</sub> | 0.0                          |
| 1647      | Tetradecad | 5     | 1(1, 0F <sub>1</sub> ) | 0111F <sub>1</sub> | 0012F <sub>1</sub> | -0.997(26)                   |
| 1648      | Tetradecad | 5     | 1(1, 0F <sub>1</sub> ) | 0111F <sub>1</sub> | 0012F <sub>2</sub> | -6.05(19) × 10 <sup>-1</sup> |
| 1649      | Tetradecad | 5     | 1(1, 0F <sub>1</sub> ) | 0111F <sub>1</sub> | 0012A <sub>1</sub> | 3.35(29) × 10 <sup>-1</sup>  |
| 1650      | Tetradecad | 5     | 1(1, 0F <sub>1</sub> ) | 0111F <sub>1</sub> | 0012E              | 0.0                          |
| 1651      | Tetradecad | 4     | 0(0, 0A <sub>1</sub> ) | 0111F <sub>1</sub> | 0012F <sub>1</sub> | 0.0                          |
| 1652      | Tetradecad | 5     | 1(1, 0F <sub>1</sub> ) | 0111F <sub>1</sub> | 0012F <sub>1</sub> | 4.08(17) × 10 <sup>-1</sup>  |
| 1653      | Tetradecad | 5     | 1(1, 0F <sub>1</sub> ) | 0111F <sub>1</sub> | 0012F <sub>2</sub> | 6.30(23) × 10 <sup>-1</sup>  |
| 1654      | Tetradecad | 4     | 0(0, 0A <sub>1</sub> ) | 0111F <sub>2</sub> | 0012F <sub>2</sub> | 6.31(11)                     |
| 1655      | Tetradecad | 5     | 1(1, 0F <sub>1</sub> ) | 0111F <sub>2</sub> | 0012F <sub>2</sub> | 0.0                          |
| 1656      | Tetradecad | 5     | 1(1, 0F <sub>1</sub> ) | 0111F <sub>2</sub> | 0012F <sub>1</sub> | -2.59(24) × 10 <sup>-1</sup> |
| 1657      | Tetradecad | 4     | 0(0, 0A <sub>1</sub> ) | 0111F <sub>2</sub> | 0012F <sub>2</sub> | 2.827(93)                    |
| 1658      | Tetradecad | 5     | 1(1, 0F <sub>1</sub> ) | 0111F <sub>2</sub> | 0012F <sub>2</sub> | 0.0                          |
| 1659      | Tetradecad | 5     | 1(1, 0F <sub>1</sub> ) | 0111F <sub>2</sub> | 0012E              | 5.24(24) × 10 <sup>-1</sup>  |
| 1660      | Tetradecad | 5     | 1(1, 0F <sub>1</sub> ) | 0111F <sub>2</sub> | 0012F <sub>1</sub> | 0.0                          |
| 1661      | Tetradecad | 4     | 0(0, 0A <sub>1</sub> ) | 0111F <sub>2</sub> | 0012F <sub>2</sub> | -1.960(95)                   |
| 1662      | Tetradecad | 5     | 1(1, 0F <sub>1</sub> ) | 0111F <sub>2</sub> | 0012F <sub>2</sub> | 3.66(21) × 10 <sup>-1</sup>  |
| 1663      | Tetradecad | 5     | 1(1, 0F <sub>1</sub> ) | 0111A <sub>1</sub> | 0012F <sub>1</sub> | 0.0                          |
| 1664      | Tetradecad | 4     | 0(0, 0A <sub>1</sub> ) | 0111A <sub>1</sub> | 0012A <sub>1</sub> | 5.64(28)                     |
| 1665      | Tetradecad | 5     | 1(1, 0F <sub>1</sub> ) | 0111A <sub>1</sub> | 0012F <sub>1</sub> | 0.0                          |
| 1666      | Tetradecad | 5     | 1(1, 0F <sub>1</sub> ) | 0111E              | 0012F <sub>2</sub> | 0.0                          |
| 1667      | Tetradecad | 5     | 1(1, 0F <sub>1</sub> ) | 0111E              | 0012F <sub>1</sub> | 0.0                          |
| 1668      | Tetradecad | 5     | 1(1, 0F <sub>1</sub> ) | 0111E              | 0012F <sub>2</sub> | 0.0                          |
| 1669      | Tetradecad | 4     | 0(0, 0A <sub>1</sub> ) | 0111E              | 0012E              | -1.77(10)                    |
| 1670      | Tetradecad | 5     | 1(1, 0F <sub>1</sub> ) | 0111E              | 0012F <sub>1</sub> | 0.0                          |
| 1671      | Tetradecad | 5     | 1(1, 0F <sub>1</sub> ) | 0111E              | 0012F <sub>2</sub> | 0.0                          |
| 1672      | Tetradecad | 5     | 1(1, 0F <sub>1</sub> ) | 0111F <sub>1</sub> | 0012F <sub>2</sub> | 3.68(27) × 10 <sup>-1</sup>  |
| 1673      | Tetradecad | 4     | 0(0, 0A <sub>1</sub> ) | 0111F <sub>1</sub> | 0012F <sub>1</sub> | -3.234(67)                   |
| 1674      | Tetradecad | 5     | 1(1, 0F <sub>1</sub> ) | 0111F <sub>1</sub> | 0012F <sub>1</sub> | 0.0                          |
| 1675      | Tetradecad | 5     | 1(1, 0F <sub>1</sub> ) | 0111F <sub>1</sub> | 0012F <sub>2</sub> | -1.043(29)                   |
| 1676      | Tetradecad | 5     | 1(1, 0F <sub>1</sub> ) | 0111F <sub>1</sub> | 0012A <sub>1</sub> | 0.0                          |
| 1677      | Tetradecad | 5     | 1(1, 0F <sub>1</sub> ) | 0111F <sub>1</sub> | 0012E              | 0.0                          |
| 1678      | Tetradecad | 4     | 0(0, 0A <sub>1</sub> ) | 0111F <sub>1</sub> | 0012F <sub>1</sub> | -3.05(11)                    |
| 1679      | Tetradecad | 5     | 1(1, 0F <sub>1</sub> ) | 0111F <sub>1</sub> | 0012F <sub>1</sub> | 1.68(31) × 10 <sup>-1</sup>  |
| 1680      | Tetradecad | 5     | 1(1, 0F <sub>1</sub> ) | 0111F <sub>1</sub> | 0012F <sub>2</sub> | 0.0                          |

Table I (continued).

| Parameter | Polyad     | Order | $\Omega(K, nC)$        | $\{s\} C_1$        | $\{s'\} C_2$       | Value / $\text{cm}^{-1}$     |
|-----------|------------|-------|------------------------|--------------------|--------------------|------------------------------|
| 1681      | Tetradecad | 4     | 0(0, 0A <sub>1</sub> ) | 0111F <sub>2</sub> | 0012F <sub>2</sub> | 0.0                          |
| 1682      | Tetradecad | 5     | 1(1, 0F <sub>1</sub> ) | 0111F <sub>2</sub> | 0012F <sub>2</sub> | 1.009(26)                    |
| 1683      | Tetradecad | 5     | 1(1, 0F <sub>1</sub> ) | 0111F <sub>2</sub> | 0012F <sub>1</sub> | 5.75(22) × 10 <sup>-1</sup>  |
| 1684      | Tetradecad | 4     | 0(0, 0A <sub>1</sub> ) | 0111F <sub>2</sub> | 0012F <sub>2</sub> | -6.69(10)                    |
| 1685      | Tetradecad | 5     | 1(1, 0F <sub>1</sub> ) | 0111F <sub>2</sub> | 0012F <sub>2</sub> | 0.0                          |
| 1686      | Tetradecad | 5     | 1(1, 0F <sub>1</sub> ) | 0111F <sub>2</sub> | 0012E              | 0.0                          |
| 1687      | Tetradecad | 5     | 1(1, 0F <sub>1</sub> ) | 0111F <sub>2</sub> | 0012F <sub>1</sub> | 0.0                          |
| 1688      | Tetradecad | 4     | 0(0, 0A <sub>1</sub> ) | 0111F <sub>2</sub> | 0012F <sub>2</sub> | 0.0                          |
| 1689      | Tetradecad | 5     | 1(1, 0F <sub>1</sub> ) | 0111F <sub>2</sub> | 0012F <sub>2</sub> | 0.0                          |
| 1690      | Tetradecad | 5     | 0(0, 0A <sub>1</sub> ) | 0111E              | 0400E              | 0.0                          |
| 1691      | Tetradecad | 5     | 0(0, 0A <sub>1</sub> ) | 0111E              | 0400E              | 0.0                          |
| 1692      | Tetradecad | 5     | 0(0, 0A <sub>1</sub> ) | 0111A <sub>1</sub> | 0400A <sub>1</sub> | -7.86(31)                    |
| 1693      | Tetradecad | 5     | 0(0, 0A <sub>1</sub> ) | 0111E              | 0400E              | 0.0                          |
| 1694      | Tetradecad | 5     | 0(0, 0A <sub>1</sub> ) | 0111E              | 0400E              | 0.0                          |
| 1695      | Tetradecad | 5     | 0(0, 0A <sub>1</sub> ) | 0111F <sub>1</sub> | 0301F <sub>1</sub> | 0.0                          |
| 1696      | Tetradecad | 5     | 0(0, 0A <sub>1</sub> ) | 0111F <sub>1</sub> | 0301F <sub>1</sub> | 0.0                          |
| 1697      | Tetradecad | 5     | 0(0, 0A <sub>1</sub> ) | 0111F <sub>2</sub> | 0301F <sub>2</sub> | 0.0                          |
| 1698      | Tetradecad | 5     | 0(0, 0A <sub>1</sub> ) | 0111F <sub>2</sub> | 0301F <sub>2</sub> | 0.0                          |
| 1699      | Tetradecad | 5     | 0(0, 0A <sub>1</sub> ) | 0111F <sub>1</sub> | 0301F <sub>1</sub> | 0.0                          |
| 1700      | Tetradecad | 5     | 0(0, 0A <sub>1</sub> ) | 0111F <sub>1</sub> | 0301F <sub>1</sub> | 0.0                          |
| 1701      | Tetradecad | 5     | 0(0, 0A <sub>1</sub> ) | 0111F <sub>2</sub> | 0301F <sub>2</sub> | 0.0                          |
| 1702      | Tetradecad | 5     | 0(0, 0A <sub>1</sub> ) | 0111F <sub>2</sub> | 0301F <sub>2</sub> | 0.0                          |
| 1703      | Tetradecad | 5     | 0(0, 0A <sub>1</sub> ) | 0111A <sub>2</sub> | 0202A <sub>2</sub> | -3.94(25)                    |
| 1704      | Tetradecad | 5     | 0(0, 0A <sub>1</sub> ) | 0111E              | 0202E              | 0.0                          |
| 1705      | Tetradecad | 5     | 0(0, 0A <sub>1</sub> ) | 0111E              | 0202E              | 5.33(16)                     |
| 1706      | Tetradecad | 5     | 0(0, 0A <sub>1</sub> ) | 0111E              | 0202E              | 0.0                          |
| 1707      | Tetradecad | 5     | 0(0, 0A <sub>1</sub> ) | 0111F <sub>1</sub> | 0202F <sub>1</sub> | 0.0                          |
| 1708      | Tetradecad | 5     | 0(0, 0A <sub>1</sub> ) | 0111F <sub>2</sub> | 0202F <sub>2</sub> | 0.0                          |
| 1709      | Tetradecad | 5     | 0(0, 0A <sub>1</sub> ) | 0111F <sub>2</sub> | 0202F <sub>2</sub> | 0.0                          |
| 1710      | Tetradecad | 5     | 0(0, 0A <sub>1</sub> ) | 0111A <sub>1</sub> | 0202A <sub>1</sub> | 0.0                          |
| 1711      | Tetradecad | 5     | 0(0, 0A <sub>1</sub> ) | 0111A <sub>1</sub> | 0202A <sub>1</sub> | -3.75(34)                    |
| 1712      | Tetradecad | 5     | 0(0, 0A <sub>1</sub> ) | 0111E              | 0202E              | 0.0                          |
| 1713      | Tetradecad | 5     | 0(0, 0A <sub>1</sub> ) | 0111E              | 0202E              | 0.0                          |
| 1714      | Tetradecad | 5     | 0(0, 0A <sub>1</sub> ) | 0111E              | 0202E              | 0.0                          |
| 1715      | Tetradecad | 5     | 0(0, 0A <sub>1</sub> ) | 0111F <sub>1</sub> | 0202F <sub>1</sub> | 0.0                          |
| 1716      | Tetradecad | 5     | 0(0, 0A <sub>1</sub> ) | 0111F <sub>2</sub> | 0202F <sub>2</sub> | -1.21(13)                    |
| 1717      | Tetradecad | 5     | 0(0, 0A <sub>1</sub> ) | 0111F <sub>2</sub> | 0202F <sub>2</sub> | -2.25(12)                    |
| 1718      | Tetradecad | 5     | 0(0, 0A <sub>1</sub> ) | 0111E              | 0103E              | 0.0                          |
| 1719      | Tetradecad | 5     | 0(0, 0A <sub>1</sub> ) | 0111F <sub>1</sub> | 0103F <sub>1</sub> | 1.70(12)                     |
| 1720      | Tetradecad | 5     | 0(0, 0A <sub>1</sub> ) | 0111F <sub>1</sub> | 0103F <sub>1</sub> | 0.0                          |
| 1721      | Tetradecad | 5     | 0(0, 0A <sub>1</sub> ) | 0111F <sub>1</sub> | 0103F <sub>1</sub> | 0.0                          |
| 1722      | Tetradecad | 5     | 0(0, 0A <sub>1</sub> ) | 0111F <sub>2</sub> | 0103F <sub>2</sub> | 0.0                          |
| 1723      | Tetradecad | 5     | 0(0, 0A <sub>1</sub> ) | 0111F <sub>2</sub> | 0103F <sub>2</sub> | 0.0                          |
| 1724      | Tetradecad | 5     | 0(0, 0A <sub>1</sub> ) | 0111F <sub>2</sub> | 0103F <sub>2</sub> | 0.0                          |
| 1725      | Tetradecad | 5     | 0(0, 0A <sub>1</sub> ) | 0111E              | 0103E              | 0.0                          |
| 1726      | Tetradecad | 5     | 0(0, 0A <sub>1</sub> ) | 0111F <sub>1</sub> | 0103F <sub>1</sub> | 0.0                          |
| 1727      | Tetradecad | 5     | 0(0, 0A <sub>1</sub> ) | 0111F <sub>1</sub> | 0103F <sub>1</sub> | 0.0                          |
| 1728      | Tetradecad | 5     | 0(0, 0A <sub>1</sub> ) | 0111F <sub>1</sub> | 0103F <sub>1</sub> | 2.22(17)                     |
| 1729      | Tetradecad | 5     | 0(0, 0A <sub>1</sub> ) | 0111F <sub>2</sub> | 0103F <sub>2</sub> | -11.67(37)                   |
| 1730      | Tetradecad | 5     | 0(0, 0A <sub>1</sub> ) | 0111F <sub>2</sub> | 0103F <sub>2</sub> | 0.0                          |
| 1731      | Tetradecad | 5     | 0(0, 0A <sub>1</sub> ) | 0111F <sub>2</sub> | 0103F <sub>2</sub> | -2.81(20)                    |
| 1732      | Tetradecad | 5     | 0(0, 0A <sub>1</sub> ) | 0111E              | 0004E              | 7.11(40)                     |
| 1733      | Tetradecad | 5     | 0(0, 0A <sub>1</sub> ) | 0111E              | 0004E              | -1.29(43)                    |
| 1734      | Tetradecad | 5     | 0(0, 0A <sub>1</sub> ) | 0111F <sub>1</sub> | 0004F <sub>1</sub> | 0.0                          |
| 1735      | Tetradecad | 5     | 0(0, 0A <sub>1</sub> ) | 0111F <sub>2</sub> | 0004F <sub>2</sub> | -5.3(4.9) × 10 <sup>-1</sup> |
| 1736      | Tetradecad | 5     | 0(0, 0A <sub>1</sub> ) | 0111F <sub>2</sub> | 0004F <sub>2</sub> | 0.0                          |
| 1737      | Tetradecad | 5     | 0(0, 0A <sub>1</sub> ) | 0111A <sub>1</sub> | 0004A <sub>1</sub> | 0.0                          |
| 1738      | Tetradecad | 5     | 0(0, 0A <sub>1</sub> ) | 0111A <sub>1</sub> | 0004A <sub>1</sub> | 0.0                          |
| 1739      | Tetradecad | 5     | 0(0, 0A <sub>1</sub> ) | 0111E              | 0004E              | 0.0                          |
| 1740      | Tetradecad | 5     | 0(0, 0A <sub>1</sub> ) | 0111E              | 0004E              | 0.0                          |
| 1741      | Tetradecad | 5     | 0(0, 0A <sub>1</sub> ) | 0111F <sub>1</sub> | 0004F <sub>1</sub> | 0.0                          |
| 1742      | Tetradecad | 5     | 0(0, 0A <sub>1</sub> ) | 0111F <sub>2</sub> | 0004F <sub>2</sub> | 0.0                          |
| 1743      | Tetradecad | 5     | 0(0, 0A <sub>1</sub> ) | 0111F <sub>2</sub> | 0004F <sub>2</sub> | -3.4(3.2) × 10 <sup>-1</sup> |
| 1744      | Tetradecad | 4     | 0(0, 0A <sub>1</sub> ) | 0012F <sub>2</sub> | 0012F <sub>2</sub> | 0.0                          |
| 1745      | Tetradecad | 5     | 1(1, 0F <sub>1</sub> ) | 0012F <sub>2</sub> | 0012F <sub>2</sub> | 0.0                          |
| 1746      | Tetradecad | 5     | 1(1, 0F <sub>1</sub> ) | 0012F <sub>2</sub> | 0012F <sub>1</sub> | 0.0                          |
| 1747      | Tetradecad | 4     | 0(0, 0A <sub>1</sub> ) | 0012F <sub>2</sub> | 0012F <sub>2</sub> | -3.692(45)                   |
| 1748      | Tetradecad | 5     | 1(1, 0F <sub>1</sub> ) | 0012F <sub>2</sub> | 0012F <sub>2</sub> | 3.80(15) × 10 <sup>-1</sup>  |
| 1749      | Tetradecad | 5     | 1(1, 0F <sub>1</sub> ) | 0012F <sub>2</sub> | 0012E              | 0.0                          |
| 1750      | Tetradecad | 5     | 1(1, 0F <sub>1</sub> ) | 0012F <sub>2</sub> | 0012F <sub>1</sub> | 0.0                          |
| 1751      | Tetradecad | 4     | 0(0, 0A <sub>1</sub> ) | 0012F <sub>2</sub> | 0012F <sub>2</sub> | -7.60(56) × 10 <sup>-1</sup> |
| 1752      | Tetradecad | 5     | 1(1, 0F <sub>1</sub> ) | 0012F <sub>2</sub> | 0012F <sub>2</sub> | 3.87(12) × 10 <sup>-1</sup>  |
| 1753      | Tetradecad | 4     | 0(0, 0A <sub>1</sub> ) | 0012F <sub>1</sub> | 0012F <sub>1</sub> | -1.19(19) × 10 <sup>-1</sup> |
| 1754      | Tetradecad | 5     | 1(1, 0F <sub>1</sub> ) | 0012F <sub>1</sub> | 0012F <sub>1</sub> | 0.0                          |
| 1755      | Tetradecad | 5     | 1(1, 0F <sub>1</sub> ) | 0012F <sub>1</sub> | 0012F <sub>2</sub> | 0.0                          |
| 1756      | Tetradecad | 5     | 1(1, 0F <sub>1</sub> ) | 0012F <sub>1</sub> | 0012A <sub>1</sub> | 0.0                          |
| 1757      | Tetradecad | 5     | 1(1, 0F <sub>1</sub> ) | 0012F <sub>1</sub> | 0012E              | 0.0                          |
| 1758      | Tetradecad | 4     | 0(0, 0A <sub>1</sub> ) | 0012F <sub>1</sub> | 0012F <sub>1</sub> | 0.0                          |
| 1759      | Tetradecad | 5     | 1(1, 0F <sub>1</sub> ) | 0012F <sub>1</sub> | 0012F <sub>1</sub> | 0.0                          |
| 1760      | Tetradecad | 5     | 1(1, 0F <sub>1</sub> ) | 0012F <sub>1</sub> | 0012F <sub>2</sub> | 0.0                          |

Table I (continued).

| Parameter | Polyad     | Order | $\Omega(K, nC)$        | $\{s\} C_1$        | $\{s'\} C_2$       | Value / $\text{cm}^{-1}$     |
|-----------|------------|-------|------------------------|--------------------|--------------------|------------------------------|
| 1761      | Tetradecad | 4     | 0(0, 0A <sub>1</sub> ) | 0012F <sub>2</sub> | 0012F <sub>2</sub> | 0.0                          |
| 1762      | Tetradecad | 5     | 1(1, 0F <sub>1</sub> ) | 0012F <sub>2</sub> | 0012F <sub>2</sub> | 4.36(20) × 10 <sup>-1</sup>  |
| 1763      | Tetradecad | 5     | 1(1, 0F <sub>1</sub> ) | 0012F <sub>2</sub> | 0012E              | 0.0                          |
| 1764      | Tetradecad | 5     | 1(1, 0F <sub>1</sub> ) | 0012F <sub>2</sub> | 0012F <sub>1</sub> | 0.0                          |
| 1765      | Tetradecad | 4     | 0(0, 0A <sub>1</sub> ) | 0012F <sub>2</sub> | 0012F <sub>2</sub> | 0.0                          |
| 1766      | Tetradecad | 5     | 1(1, 0F <sub>1</sub> ) | 0012F <sub>2</sub> | 0012F <sub>2</sub> | 0.0                          |
| 1767      | Tetradecad | 4     | 0(0, 0A <sub>1</sub> ) | 0012A <sub>1</sub> | 0012A <sub>1</sub> | 15.67(42)                    |
| 1768      | Tetradecad | 5     | 1(1, 0F <sub>1</sub> ) | 0012A <sub>1</sub> | 0012F <sub>1</sub> | 0.0                          |
| 1769      | Tetradecad | 4     | 0(0, 0A <sub>1</sub> ) | 0012E              | 0012E              | -1.139(54)                   |
| 1770      | Tetradecad | 5     | 1(1, 0F <sub>1</sub> ) | 0012E              | 0012F <sub>1</sub> | 0.0                          |
| 1771      | Tetradecad | 5     | 1(1, 0F <sub>1</sub> ) | 0012E              | 0012F <sub>2</sub> | 0.0                          |
| 1772      | Tetradecad | 4     | 0(0, 0A <sub>1</sub> ) | 0012F <sub>1</sub> | 0012F <sub>1</sub> | 7.26(68) × 10 <sup>-1</sup>  |
| 1773      | Tetradecad | 5     | 1(1, 0F <sub>1</sub> ) | 0012F <sub>1</sub> | 0012F <sub>1</sub> | 0.0                          |
| 1774      | Tetradecad | 5     | 1(1, 0F <sub>1</sub> ) | 0012F <sub>1</sub> | 0012F <sub>2</sub> | -2.09(13) × 10 <sup>-1</sup> |
| 1775      | Tetradecad | 4     | 0(0, 0A <sub>1</sub> ) | 0012F <sub>2</sub> | 0012F <sub>2</sub> | 2.03(78) × 10 <sup>-1</sup>  |
| 1776      | Tetradecad | 5     | 1(1, 0F <sub>1</sub> ) | 0012F <sub>2</sub> | 0012F <sub>2</sub> | -1.012(26)                   |
| 1777      | Tetradecad | 5     | 0(0, 0A <sub>1</sub> ) | 0012A <sub>1</sub> | 0400A <sub>1</sub> | 0.0                          |
| 1778      | Tetradecad | 5     | 0(0, 0A <sub>1</sub> ) | 0012E              | 0400E              | 0.0                          |
| 1779      | Tetradecad | 5     | 0(0, 0A <sub>1</sub> ) | 0012E              | 0400E              | 0.0                          |
| 1780      | Tetradecad | 5     | 0(0, 0A <sub>1</sub> ) | 0012F <sub>2</sub> | 0301F <sub>2</sub> | 0.0                          |
| 1781      | Tetradecad | 5     | 0(0, 0A <sub>1</sub> ) | 0012F <sub>2</sub> | 0301F <sub>2</sub> | 2.24(13)                     |
| 1782      | Tetradecad | 5     | 0(0, 0A <sub>1</sub> ) | 0012F <sub>1</sub> | 0301F <sub>1</sub> | 3.27(15)                     |
| 1783      | Tetradecad | 5     | 0(0, 0A <sub>1</sub> ) | 0012F <sub>1</sub> | 0301F <sub>1</sub> | 0.0                          |
| 1784      | Tetradecad | 5     | 0(0, 0A <sub>1</sub> ) | 0012F <sub>2</sub> | 0301F <sub>2</sub> | 0.0                          |
| 1785      | Tetradecad | 5     | 0(0, 0A <sub>1</sub> ) | 0012F <sub>2</sub> | 0301F <sub>2</sub> | 0.0                          |
| 1786      | Tetradecad | 5     | 0(0, 0A <sub>1</sub> ) | 0012F <sub>1</sub> | 0301F <sub>1</sub> | 2.51(14)                     |
| 1787      | Tetradecad | 5     | 0(0, 0A <sub>1</sub> ) | 0012F <sub>1</sub> | 0301F <sub>1</sub> | 0.0                          |
| 1788      | Tetradecad | 5     | 0(0, 0A <sub>1</sub> ) | 0012F <sub>2</sub> | 0301F <sub>2</sub> | 0.0                          |
| 1789      | Tetradecad | 5     | 0(0, 0A <sub>1</sub> ) | 0012F <sub>2</sub> | 0301F <sub>2</sub> | 0.0                          |
| 1790      | Tetradecad | 5     | 0(0, 0A <sub>1</sub> ) | 0012F <sub>2</sub> | 0202F <sub>2</sub> | 0.0                          |
| 1791      | Tetradecad | 5     | 0(0, 0A <sub>1</sub> ) | 0012F <sub>2</sub> | 0202F <sub>2</sub> | 0.0                          |
| 1792      | Tetradecad | 5     | 0(0, 0A <sub>1</sub> ) | 0012F <sub>1</sub> | 0202F <sub>1</sub> | 1.405(36)                    |
| 1793      | Tetradecad | 5     | 0(0, 0A <sub>1</sub> ) | 0012F <sub>2</sub> | 0202F <sub>2</sub> | 0.0                          |
| 1794      | Tetradecad | 5     | 0(0, 0A <sub>1</sub> ) | 0012F <sub>2</sub> | 0202F <sub>2</sub> | -6.64(24) × 10 <sup>-1</sup> |
| 1795      | Tetradecad | 5     | 0(0, 0A <sub>1</sub> ) | 0012A <sub>1</sub> | 0202A <sub>1</sub> | 0.0                          |
| 1796      | Tetradecad | 5     | 0(0, 0A <sub>1</sub> ) | 0012A <sub>1</sub> | 0202A <sub>1</sub> | 0.0                          |
| 1797      | Tetradecad | 5     | 0(0, 0A <sub>1</sub> ) | 0012E              | 0202E              | 0.0                          |
| 1798      | Tetradecad | 5     | 0(0, 0A <sub>1</sub> ) | 0012E              | 0202E              | 0.0                          |
| 1799      | Tetradecad | 5     | 0(0, 0A <sub>1</sub> ) | 0012E              | 0202E              | 0.0                          |
| 1800      | Tetradecad | 5     | 0(0, 0A <sub>1</sub> ) | 0012F <sub>1</sub> | 0202F <sub>1</sub> | 1.55(33) × 10 <sup>-1</sup>  |
| 1801      | Tetradecad | 5     | 0(0, 0A <sub>1</sub> ) | 0012F <sub>2</sub> | 0202F <sub>2</sub> | 0.0                          |
| 1802      | Tetradecad | 5     | 0(0, 0A <sub>1</sub> ) | 0012F <sub>2</sub> | 0202F <sub>2</sub> | 0.0                          |
| 1803      | Tetradecad | 5     | 0(0, 0A <sub>1</sub> ) | 0012F <sub>2</sub> | 0103F <sub>2</sub> | 0.0                          |
| 1804      | Tetradecad | 5     | 0(0, 0A <sub>1</sub> ) | 0012F <sub>2</sub> | 0103F <sub>2</sub> | 0.0                          |
| 1805      | Tetradecad | 5     | 0(0, 0A <sub>1</sub> ) | 0012F <sub>2</sub> | 0103F <sub>2</sub> | 0.0                          |
| 1806      | Tetradecad | 5     | 0(0, 0A <sub>1</sub> ) | 0012F <sub>1</sub> | 0103F <sub>1</sub> | 5.09(22)                     |
| 1807      | Tetradecad | 5     | 0(0, 0A <sub>1</sub> ) | 0012F <sub>1</sub> | 0103F <sub>1</sub> | 1.701(95)                    |
| 1808      | Tetradecad | 5     | 0(0, 0A <sub>1</sub> ) | 0012F <sub>1</sub> | 0103F <sub>1</sub> | 0.0                          |
| 1809      | Tetradecad | 5     | 0(0, 0A <sub>1</sub> ) | 0012F <sub>2</sub> | 0103F <sub>2</sub> | 2.65(16)                     |
| 1810      | Tetradecad | 5     | 0(0, 0A <sub>1</sub> ) | 0012F <sub>2</sub> | 0103F <sub>2</sub> | 0.0                          |
| 1811      | Tetradecad | 5     | 0(0, 0A <sub>1</sub> ) | 0012F <sub>2</sub> | 0103F <sub>2</sub> | 0.0                          |
| 1812      | Tetradecad | 5     | 0(0, 0A <sub>1</sub> ) | 0012E              | 0103E              | -1.51(12)                    |
| 1813      | Tetradecad | 5     | 0(0, 0A <sub>1</sub> ) | 0012F <sub>1</sub> | 0103F <sub>1</sub> | 0.0                          |
| 1814      | Tetradecad | 5     | 0(0, 0A <sub>1</sub> ) | 0012F <sub>1</sub> | 0103F <sub>1</sub> | 0.0                          |
| 1815      | Tetradecad | 5     | 0(0, 0A <sub>1</sub> ) | 0012F <sub>1</sub> | 0103F <sub>1</sub> | 0.0                          |
| 1816      | Tetradecad | 5     | 0(0, 0A <sub>1</sub> ) | 0012F <sub>2</sub> | 0103F <sub>2</sub> | 0.0                          |
| 1817      | Tetradecad | 5     | 0(0, 0A <sub>1</sub> ) | 0012F <sub>2</sub> | 0103F <sub>2</sub> | 1.02(12)                     |
| 1818      | Tetradecad | 5     | 0(0, 0A <sub>1</sub> ) | 0012F <sub>2</sub> | 0103F <sub>2</sub> | 0.0                          |
| 1819      | Tetradecad | 5     | 0(0, 0A <sub>1</sub> ) | 0012F <sub>2</sub> | 0004F <sub>2</sub> | 0.0                          |
| 1820      | Tetradecad | 5     | 0(0, 0A <sub>1</sub> ) | 0012F <sub>2</sub> | 0004F <sub>2</sub> | -1.199(75)                   |
| 1821      | Tetradecad | 5     | 0(0, 0A <sub>1</sub> ) | 0012F <sub>1</sub> | 0004F <sub>1</sub> | 0.0                          |
| 1822      | Tetradecad | 5     | 0(0, 0A <sub>1</sub> ) | 0012F <sub>2</sub> | 0004F <sub>2</sub> | 0.0                          |
| 1823      | Tetradecad | 5     | 0(0, 0A <sub>1</sub> ) | 0012F <sub>2</sub> | 0004F <sub>2</sub> | 0.0                          |
| 1824      | Tetradecad | 5     | 0(0, 0A <sub>1</sub> ) | 0012A <sub>1</sub> | 0004A <sub>1</sub> | 0.0                          |
| 1825      | Tetradecad | 5     | 0(0, 0A <sub>1</sub> ) | 0012A <sub>1</sub> | 0004A <sub>1</sub> | -1.40(40)                    |
| 1826      | Tetradecad | 5     | 0(0, 0A <sub>1</sub> ) | 0012E              | 0004E              | 0.0                          |
| 1827      | Tetradecad | 5     | 0(0, 0A <sub>1</sub> ) | 0012E              | 0004E              | 0.0                          |
| 1828      | Tetradecad | 5     | 0(0, 0A <sub>1</sub> ) | 0012F <sub>1</sub> | 0004F <sub>1</sub> | 0.0                          |
| 1829      | Tetradecad | 5     | 0(0, 0A <sub>1</sub> ) | 0012F <sub>2</sub> | 0004F <sub>2</sub> | 0.0                          |
| 1830      | Tetradecad | 5     | 0(0, 0A <sub>1</sub> ) | 0012F <sub>2</sub> | 0004F <sub>2</sub> | 0.0                          |

Table II.

| $\tilde{\nu}_e/\text{cm}^{-1}$ | $\tilde{\nu}_c/\text{cm}^{-1}$ | $\tilde{\nu}_e - \tilde{\nu}_c/10^{-3}\text{cm}^{-1}$ | $I_e/\text{cm}^{-2}\text{atm}^{-1}$ | $I_c/\text{cm}^{-2}\text{atm}^{-1}$ | $I_e - I_c/\%$ | $J''$ | $C''$ | $\alpha''$ | $J'$ | $C'$  | $\alpha'$ |
|--------------------------------|--------------------------------|-------------------------------------------------------|-------------------------------------|-------------------------------------|----------------|-------|-------|------------|------|-------|-----------|
| 4885.742900                    | 4885.730076                    | 12.824                                                | $0.1052 \times 10^{-4}$             | $0.1009 \times 10^{-4}$             | 4.256          | 12    | $A_1$ | 2          | 11   | $A_2$ | 2         |
| 4889.844500                    | 4889.821208                    | 23.292                                                | $0.3151 \times 10^{-5}$             | $0.3618 \times 10^{-5}$             | -12.905        | 12    | $F_1$ | 2          | 11   | $F_2$ | 4         |
| 4890.399800                    | 4890.400683                    | -0.883                                                | $0.3173 \times 10^{-5}$             | $0.3450 \times 10^{-5}$             | -8.036         | 12    | $F_2$ | 1          | 11   | $F_1$ | 5         |
| 4892.521900                    | 4892.502122                    | 19.778                                                | $0.7104 \times 10^{-5}$             | $0.8221 \times 10^{-5}$             | -13.589        | 12    | $A_2$ | 1          | 11   | $A_1$ | 2         |
| 4892.861500                    | 4892.848815                    | 12.685                                                | $0.1830 \times 10^{-5}$             | $0.2073 \times 10^{-5}$             | -11.741        | 12    | $F_2$ | 3          | 11   | $F_1$ | 6         |
| 4896.946000                    | 4896.936543                    | 9.457                                                 | $0.2303 \times 10^{-5}$             | $0.2636 \times 10^{-5}$             | -12.630        | 12    | $E$   | 2          | 11   | $E$   | 4         |
| 4897.184600                    | 4897.169411                    | 15.189                                                | $0.2848 \times 10^{-5}$             | $0.3384 \times 10^{-5}$             | -15.849        | 12    | $F_2$ | 2          | 11   | $F_1$ | 7         |
| 4909.426000                    | 4909.414987                    | 11.013                                                | $0.5211 \times 10^{-5}$             | $0.5473 \times 10^{-5}$             | -4.785         | 11    | $E$   | 2          | 10   | $E$   | 2         |
| 4909.760900                    | 4909.754067                    | 6.833                                                 | $0.8078 \times 10^{-5}$             | $0.8825 \times 10^{-5}$             | -8.463         | 11    | $F_1$ | 3          | 10   | $F_2$ | 4         |
| 4913.769500                    | 4913.770808                    | -1.308                                                | $0.4386 \times 10^{-5}$             | $0.4772 \times 10^{-5}$             | -8.084         | 11    | $E$   | 1          | 10   | $E$   | 3         |
| 4913.965700                    | 4913.971058                    | -5.358                                                | $0.6025 \times 10^{-5}$             | $0.6536 \times 10^{-5}$             | -7.813         | 11    | $F_2$ | 2          | 10   | $F_1$ | 3         |
| 4914.634800                    | 4914.651868                    | -17.068                                               | $0.1158 \times 10^{-4}$             | $0.1269 \times 10^{-4}$             | -8.769         | 11    | $A_2$ | 1          | 10   | $A_1$ | 2         |
| 4916.849700                    | 4916.839866                    | 9.834                                                 | $0.5289 \times 10^{-5}$             | $0.5759 \times 10^{-5}$             | -8.165         | 11    | $F_2$ | 3          | 10   | $F_1$ | 4         |
| 4921.571300                    | 4921.568271                    | 3.029                                                 | $0.1323 \times 10^{-5}$             | $0.1331 \times 10^{-5}$             | -0.629         | 13    | $A_1$ | 1          | 12   | $A_2$ | 4         |
| 4921.644700                    | 4921.635074                    | 9.626                                                 | $0.4007 \times 10^{-5}$             | $0.4506 \times 10^{-5}$             | -11.080        | 11    | $F_1$ | 2          | 10   | $F_2$ | 6         |
| 4925.333000                    | 4925.334543                    | -1.543                                                | $0.1029 \times 10^{-4}$             | $0.1142 \times 10^{-4}$             | -9.903         | 12    | $A_1$ | 1          | 11   | $A_2$ | 3         |
| 4925.474500                    | 4925.463624                    | 10.876                                                | $0.3946 \times 10^{-5}$             | $0.4521 \times 10^{-5}$             | -12.719        | 12    | $E$   | 1          | 11   | $E$   | 5         |
| 4925.522400                    | 4925.509025                    | 13.375                                                | $0.5854 \times 10^{-5}$             | $0.6701 \times 10^{-5}$             | -12.645        | 12    | $F_1$ | 1          | 11   | $F_2$ | 8         |
| 4927.715800                    | 4927.687216                    | 28.584                                                | $0.1178 \times 10^{-4}$             | $0.1203 \times 10^{-4}$             | -2.056         | 10    | $A_1$ | 1          | 9    | $A_2$ | 1         |
| 4928.343000                    | 4928.328535                    | 14.465                                                | $0.6713 \times 10^{-5}$             | $0.6562 \times 10^{-5}$             | 2.303          | 10    | $F_1$ | 2          | 9    | $F_2$ | 2         |
| 4928.708300                    | 4928.702280                    | 6.020                                                 | $0.5062 \times 10^{-5}$             | $0.4976 \times 10^{-5}$             | 1.737          | 10    | $E$   | 2          | 9    | $E$   | 2         |
| 4934.296000                    | 4934.296364                    | -0.364                                                | $0.1454 \times 10^{-4}$             | $0.1508 \times 10^{-4}$             | -3.586         | 10    | $F_2$ | 3          | 9    | $F_1$ | 3         |
| 4936.881500                    | 4936.889749                    | -8.249                                                | $0.2816 \times 10^{-5}$             | $0.2972 \times 10^{-5}$             | -5.258         | 10    | $F_1$ | 2          | 9    | $F_2$ | 3         |
| 4936.957000                    | 4936.965230                    | -8.230                                                | $0.9896 \times 10^{-5}$             | $0.1029 \times 10^{-4}$             | -3.822         | 10    | $F_1$ | 1          | 9    | $F_2$ | 3         |
| 4937.620500                    | 4937.633465                    | -12.965                                               | $0.1152 \times 10^{-4}$             | $0.1236 \times 10^{-4}$             | -6.768         | 10    | $F_2$ | 2          | 9    | $F_1$ | 4         |
| 4940.672900                    | 4940.668405                    | 4.495                                                 | $0.5380 \times 10^{-5}$             | $0.5891 \times 10^{-5}$             | -8.672         | 10    | $E$   | 2          | 9    | $E$   | 3         |
| 4943.858100                    | 4943.836862                    | 21.238                                                | $0.4717 \times 10^{-5}$             | $0.4354 \times 10^{-5}$             | 8.328          | 9     | $A_2$ | 1          | 8    | $A_1$ | 1         |
| 4945.195400                    | 4945.196892                    | -1.492                                                | $0.1290 \times 10^{-4}$             | $0.1416 \times 10^{-4}$             | -8.923         | 10    | $A_1$ | 1          | 9    | $A_2$ | 2         |
| 4946.263100                    | 4946.267957                    | -4.857                                                | $0.1100 \times 10^{-4}$             | $0.1163 \times 10^{-4}$             | -5.423         | 11    | $F_1$ | 1          | 10   | $F_2$ | 7         |
| 4946.356100                    | 4946.352957                    | 3.143                                                 | $0.1088 \times 10^{-4}$             | $0.1171 \times 10^{-4}$             | -7.074         | 11    | $F_2$ | 1          | 10   | $F_1$ | 6         |
| 4954.285900                    | 4954.275328                    | 10.572                                                | $0.1417 \times 10^{-4}$             | $0.1419 \times 10^{-4}$             | -0.153         | 9     | $F_1$ | 3          | 8    | $F_2$ | 2         |
| 4955.518200                    | 4955.517933                    | 0.267                                                 | $0.1658 \times 10^{-4}$             | $0.1637 \times 10^{-4}$             | 1.303          | 9     | $F_2$ | 2          | 8    | $F_1$ | 2         |
| 4958.460800                    | 4958.465001                    | -4.201                                                | $0.3672 \times 10^{-4}$             | $0.3683 \times 10^{-4}$             | -0.286         | 9     | $A_2$ | 1          | 8    | $A_1$ | 2         |
| 4959.532400                    | 4959.541763                    | -9.363                                                | $0.3474 \times 10^{-4}$             | $0.3546 \times 10^{-4}$             | -2.044         | 9     | $A_1$ | 1          | 8    | $A_2$ | 1         |
| 4960.034700                    | 4960.044997                    | -10.297                                               | $0.3699 \times 10^{-5}$             | $0.3759 \times 10^{-5}$             | -1.587         | 9     | $F_1$ | 3          | 8    | $F_2$ | 3         |
| 4960.084500                    | 4960.094717                    | -10.217                                               | $0.1608 \times 10^{-4}$             | $0.1611 \times 10^{-4}$             | -0.195         | 9     | $F_1$ | 2          | 8    | $F_2$ | 3         |
| 4960.514700                    | 4960.527712                    | -13.012                                               | $0.1227 \times 10^{-4}$             | $0.1259 \times 10^{-4}$             | -2.505         | 9     | $E$   | 1          | 8    | $E$   | 2         |
| 4961.783900                    | 4961.778924                    | 4.976                                                 | $0.1938 \times 10^{-5}$             | $0.1723 \times 10^{-5}$             | 12.483         | 11    | $F_2$ | 2          | 10   | $F_1$ | 9         |
| 4962.043100                    | 4962.041048                    | 2.052                                                 | $0.2365 \times 10^{-5}$             | $0.2301 \times 10^{-5}$             | 2.763          | 11    | $A_2$ | 1          | 10   | $A_1$ | 4         |
| 4965.374000                    | 4965.370944                    | 3.056                                                 | $0.6610 \times 10^{-5}$             | $0.6743 \times 10^{-5}$             | -1.970         | 9     | $F_2$ | 2          | 8    | $F_1$ | 3         |
| 4966.625200                    | 4966.634613                    | -9.413                                                | $0.1133 \times 10^{-4}$             | $0.1223 \times 10^{-4}$             | -7.370         | 10    | $E$   | 1          | 9    | $E$   | 4         |
| 4966.647800                    | 4966.653321                    | -5.521                                                | $0.1863 \times 10^{-4}$             | $0.1864 \times 10^{-4}$             | -0.042         | 10    | $F_2$ | 1          | 9    | $F_1$ | 6         |
| 4966.686100                    | 4966.684356                    | 1.744                                                 | $0.3107 \times 10^{-4}$             | $0.3214 \times 10^{-4}$             | -3.318         | 10    | $A_2$ | 1          | 9    | $A_1$ | 2         |
| 4968.956300                    | 4968.952473                    | 3.827                                                 | $0.5698 \times 10^{-5}$             | $0.6095 \times 10^{-5}$             | -6.521         | 9     | $F_1$ | 3          | 8    | $F_2$ | 4         |
| 4974.727100                    | 4974.713482                    | 13.618                                                | $0.5964 \times 10^{-5}$             | $0.6289 \times 10^{-5}$             | -5.166         | 8     | $F_2$ | 2          | 7    | $F_1$ | 1         |
| 4978.970200                    | 4978.967631                    | 2.569                                                 | $0.1973 \times 10^{-4}$             | $0.1912 \times 10^{-4}$             | 3.202          | 8     | $E$   | 2          | 7    | $E$   | 1         |
| 4980.106700                    | 4980.106430                    | 0.270                                                 | $0.2129 \times 10^{-4}$             | $0.2063 \times 10^{-4}$             | 3.196          | 8     | $F_2$ | 2          | 7    | $F_1$ | 2         |
| 4980.146900                    | 4980.146825                    | 0.075                                                 | $0.4225 \times 10^{-5}$             | $0.4048 \times 10^{-5}$             | 4.362          | 8     | $F_2$ | 1          | 7    | $F_1$ | 2         |
| 4981.049200                    | 4981.049560                    | -0.360                                                | $0.2035 \times 10^{-5}$             | $0.2176 \times 10^{-5}$             | -6.459         | 10    | $F_1$ | 1          | 9    | $F_2$ | 8         |
| 4982.128600                    | 4982.121834                    | 6.766                                                 | $0.1993 \times 10^{-5}$             | $0.1963 \times 10^{-5}$             | 1.533          | 10    | $F_2$ | 2          | 9    | $F_1$ | 9         |

Table II (continued).

| $\tilde{\nu}_e/\text{cm}^{-1}$ | $\tilde{\nu}_c/\text{cm}^{-1}$ | $\tilde{\nu}_e - \tilde{\nu}_c/10^{-3}\text{cm}^{-1}$ | $I_e/\text{cm}^{-2}\text{atm}^{-1}$ | $I_c/\text{cm}^{-2}\text{atm}^{-1}$ | $I_e - I_c/\%$ | $J''$ | $C''$ | $\alpha''$ | $J'$ | $C'$  | $\alpha'$ |
|--------------------------------|--------------------------------|-------------------------------------------------------|-------------------------------------|-------------------------------------|----------------|-------|-------|------------|------|-------|-----------|
| 4982.472300                    | 4982.481814                    | -9.514                                                | $0.2931 \times 10^{-4}$             | $0.2885 \times 10^{-4}$             | 1.584          | 8     | $F_1$ | 2          | 7    | $F_2$ | 2         |
| 4982.987100                    | 4982.997026                    | -9.926                                                | $0.4071 \times 10^{-5}$             | $0.4042 \times 10^{-5}$             | 0.709          | 8     | $F_2$ | 2          | 7    | $F_1$ | 3         |
| 4983.027200                    | 4983.037421                    | -10.221                                               | $0.2259 \times 10^{-4}$             | $0.2244 \times 10^{-4}$             | 0.659          | 8     | $F_2$ | 1          | 7    | $F_1$ | 3         |
| 4986.419400                    | 4986.425001                    | -5.601                                                | $0.2760 \times 10^{-4}$             | $0.2799 \times 10^{-4}$             | -1.408         | 9     | $F_2$ | 1          | 8    | $F_1$ | 5         |
| 4986.517600                    | 4986.528509                    | -10.909                                               | $0.2691 \times 10^{-4}$             | $0.2702 \times 10^{-4}$             | -0.409         | 9     | $F_1$ | 1          | 8    | $F_2$ | 5         |
| 4994.113400                    | 4994.110131                    | 3.269                                                 | $0.6314 \times 10^{-5}$             | $0.6104 \times 10^{-5}$             | 3.441          | 9     | $A_1$ | 1          | 8    | $A_2$ | 2         |
| 5001.157900                    | 5001.173693                    | -15.793                                               | $0.3824 \times 10^{-5}$             | $0.3780 \times 10^{-5}$             | 1.172          | 9     | $A_1$ | 1          | 8    | $A_2$ | 3         |
| 5001.848000                    | 5001.846741                    | 1.259                                                 | $0.1421 \times 10^{-5}$             | $0.1464 \times 10^{-5}$             | -2.933         | 9     | $F_1$ | 2          | 8    | $F_2$ | 8         |
| 5002.349400                    | 5002.349365                    | 0.035                                                 | $0.4374 \times 10^{-4}$             | $0.4116 \times 10^{-4}$             | 6.269          | 7     | $F_1$ | 2          | 6    | $F_2$ | 1         |
| 5003.348800                    | 5003.347470                    | 1.330                                                 | $0.2362 \times 10^{-4}$             | $0.2228 \times 10^{-4}$             | 6.028          | 7     | $E$   | 1          | 6    | $E$   | 1         |
| 5004.394500                    | 5004.399589                    | -5.089                                                | $0.3917 \times 10^{-4}$             | $0.3788 \times 10^{-4}$             | 3.419          | 7     | $F_2$ | 2          | 6    | $F_1$ | 1         |
| 5005.172100                    | 5005.180157                    | -8.057                                                | $0.6153 \times 10^{-4}$             | $0.5979 \times 10^{-4}$             | 2.906          | 7     | $A_2$ | 1          | 6    | $A_1$ | 1         |
| 5005.689200                    | 5005.695174                    | -5.974                                                | $0.2632 \times 10^{-4}$             | $0.2565 \times 10^{-4}$             | 2.630          | 8     | $E$   | 1          | 7    | $E$   | 3         |
| 5005.818700                    | 5005.827664                    | -8.964                                                | $0.3750 \times 10^{-4}$             | $0.3731 \times 10^{-4}$             | 0.506          | 8     | $F_1$ | 1          | 7    | $F_2$ | 4         |
| 5006.101300                    | 5006.116872                    | -15.572                                               | $0.6074 \times 10^{-4}$             | $0.6012 \times 10^{-4}$             | 1.027          | 8     | $A_1$ | 1          | 7    | $A_2$ | 2         |
| 5009.911100                    | 5009.896517                    | 14.583                                                | $0.5649 \times 10^{-5}$             | $0.4735 \times 10^{-5}$             | 19.314         | 11    | $A_2$ | 1          | 10   | $A_1$ | 7         |
| 5013.245000                    | 5013.245596                    | -0.596                                                | $0.4695 \times 10^{-5}$             | $0.4333 \times 10^{-5}$             | 8.364          | 8     | $F_1$ | 2          | 7    | $F_2$ | 5         |
| 5022.686500                    | 5022.682443                    | 4.057                                                 | $0.1798 \times 10^{-5}$             | $0.1834 \times 10^{-5}$             | -1.949         | 8     | $F_1$ | 2          | 7    | $F_2$ | 6         |
| 5024.352100                    | 5024.354615                    | -2.515                                                | $0.4949 \times 10^{-4}$             | $0.4805 \times 10^{-4}$             | 3.004          | 7     | $F_2$ | 1          | 6    | $F_1$ | 3         |
| 5025.151400                    | 5025.152605                    | -1.205                                                | $0.9448 \times 10^{-4}$             | $0.9011 \times 10^{-4}$             | 4.851          | 6     | $A_1$ | 1          | 5    | $A_2$ | 1         |
| 5025.194700                    | 5025.209435                    | -14.735                                               | $0.4430 \times 10^{-4}$             | $0.4282 \times 10^{-4}$             | 3.446          | 7     | $F_1$ | 1          | 6    | $F_2$ | 4         |
| 5025.605500                    | 5025.596632                    | 8.868                                                 | $0.8844 \times 10^{-5}$             | $0.7795 \times 10^{-5}$             | 13.452         | 10    | $A_1$ | 1          | 9    | $A_2$ | 5         |
| 5025.911200                    | 5025.913695                    | -2.495                                                | $0.5340 \times 10^{-4}$             | $0.5109 \times 10^{-4}$             | 4.521          | 6     | $F_1$ | 1          | 5    | $F_2$ | 1         |
| 5026.612000                    | 5026.616030                    | -4.030                                                | $0.4942 \times 10^{-4}$             | $0.4714 \times 10^{-4}$             | 4.844          | 6     | $F_2$ | 2          | 5    | $F_1$ | 1         |
| 5028.789900                    | 5028.795307                    | -5.407                                                | $0.2958 \times 10^{-5}$             | $0.1720 \times 10^{-5}$             | 71.966         | 10    | $F_2$ | 1          | 10   | $F_1$ | 3         |
| 5029.440700                    | 5029.458515                    | -17.815                                               | $0.5695 \times 10^{-5}$             | $0.3201 \times 10^{-5}$             | 77.911         | 10    | $A_2$ | 1          | 10   | $A_1$ | 2         |
| 5034.601300                    | 5034.594293                    | 7.007                                                 | $0.5627 \times 10^{-5}$             | $0.4767 \times 10^{-5}$             | 18.029         | 9     | $F_1$ | 1          | 8    | $F_2$ | 12        |
| 5041.424000                    | 5041.432565                    | -8.565                                                | $0.4181 \times 10^{-5}$             | $0.2817 \times 10^{-5}$             | 48.445         | 9     | $F_1$ | 1          | 9    | $F_2$ | 3         |
| 5041.844800                    | 5041.837822                    | 6.978                                                 | $0.2189 \times 10^{-4}$             | $0.2081 \times 10^{-4}$             | 5.200          | 6     | $E$   | 1          | 5    | $E$   | 1         |
| 5041.920700                    | 5041.916965                    | 3.735                                                 | $0.1141 \times 10^{-3}$             | $0.1084 \times 10^{-3}$             | 5.249          | 6     | $A_2$ | 1          | 5    | $A_1$ | 1         |
| 5042.070000                    | 5042.083187                    | -13.187                                               | $0.4903 \times 10^{-5}$             | $0.3165 \times 10^{-5}$             | 54.918         | 9     | $F_2$ | 1          | 9    | $F_1$ | 4         |
| 5043.053400                    | 5043.059178                    | -5.778                                                | $0.3525 \times 10^{-5}$             | $0.2877 \times 10^{-5}$             | 22.536         | 6     | $F_2$ | 2          | 5    | $F_1$ | 3         |
| 5043.075400                    | 5043.080894                    | -5.494                                                | $0.5270 \times 10^{-4}$             | $0.5082 \times 10^{-4}$             | 3.697          | 6     | $F_2$ | 1          | 5    | $F_1$ | 3         |
| 5045.463100                    | 5045.476135                    | -13.035                                               | $0.1309 \times 10^{-4}$             | $0.1247 \times 10^{-4}$             | 4.977          | 6     | $E$   | 1          | 5    | $E$   | 2         |
| 5045.808800                    | 5045.809055                    | -0.255                                                | $0.1316 \times 10^{-4}$             | $0.1286 \times 10^{-4}$             | 2.370          | 8     | $F_2$ | 1          | 7    | $F_1$ | 10        |
| 5046.378400                    | 5046.383364                    | -4.964                                                | $0.2274 \times 10^{-5}$             | $0.2001 \times 10^{-5}$             | 13.626         | 8     | $E$   | 2          | 7    | $E$   | 6         |
| 5046.465000                    | 5046.469006                    | -4.006                                                | $0.5377 \times 10^{-5}$             | $0.4641 \times 10^{-5}$             | 15.852         | 8     | $E$   | 1          | 7    | $E$   | 6         |
| 5046.605500                    | 5046.610912                    | -5.412                                                | $0.2124 \times 10^{-5}$             | $0.2146 \times 10^{-5}$             | -1.026         | 8     | $F_1$ | 2          | 7    | $F_2$ | 9         |
| 5046.676500                    | 5046.681970                    | -5.470                                                | $0.7175 \times 10^{-5}$             | $0.6750 \times 10^{-5}$             | 6.296          | 8     | $F_1$ | 1          | 7    | $F_2$ | 9         |
| 5047.509500                    | 5047.504766                    | 4.734                                                 | $0.1498 \times 10^{-4}$             | $0.1339 \times 10^{-4}$             | 11.906         | 8     | $A_1$ | 1          | 7    | $A_2$ | 4         |
| 5047.765100                    | 5047.765810                    | -0.710                                                | $0.6238 \times 10^{-4}$             | $0.5856 \times 10^{-4}$             | 6.526          | 5     | $F_1$ | 2          | 4    | $F_2$ | 1         |
| 5048.122400                    | 5048.123990                    | -1.590                                                | $0.3939 \times 10^{-4}$             | $0.3724 \times 10^{-4}$             | 5.771          | 5     | $E$   | 1          | 4    | $E$   | 1         |
| 5053.632800                    | 5053.642276                    | -9.476                                                | $0.8998 \times 10^{-5}$             | $0.6433 \times 10^{-5}$             | 39.868         | 8     | $A_1$ | 1          | 8    | $A_2$ | 1         |
| 5054.156100                    | 5054.166265                    | -10.165                                               | $0.6260 \times 10^{-5}$             | $0.4325 \times 10^{-5}$             | 44.750         | 8     | $F_1$ | 1          | 8    | $F_2$ | 3         |
| 5054.578200                    | 5054.591027                    | -12.827                                               | $0.4511 \times 10^{-5}$             | $0.3166 \times 10^{-5}$             | 42.480         | 8     | $E$   | 1          | 8    | $E$   | 2         |
| 5056.728300                    | 5056.726972                    | 1.328                                                 | $0.3626 \times 10^{-4}$             | $0.3449 \times 10^{-4}$             | 5.122          | 7     | $A_2$ | 1          | 6    | $A_1$ | 4         |
| 5057.079100                    | 5057.075981                    | 3.119                                                 | $0.6224 \times 10^{-5}$             | $0.6545 \times 10^{-5}$             | -4.905         | 12    | $A_1$ | 1          | 12   | $A_2$ | 4         |
| 5057.536700                    | 5057.539564                    | -2.864                                                | $0.8200 \times 10^{-5}$             | $0.7634 \times 10^{-5}$             | 7.413          | 7     | $F_2$ | 2          | 6    | $F_1$ | 7         |
| 5057.574200                    | 5057.577583                    | -3.383                                                | $0.9245 \times 10^{-5}$             | $0.8308 \times 10^{-5}$             | 11.274         | 7     | $F_2$ | 1          | 6    | $F_1$ | 7         |
| 5058.605000                    | 5058.609527                    | -4.527                                                | $0.1112 \times 10^{-4}$             | $0.1025 \times 10^{-4}$             | 8.481          | 7     | $F_1$ | 1          | 6    | $F_2$ | 8         |



Table II (continued).

| $\tilde{\nu}_e/\text{cm}^{-1}$ | $\tilde{\nu}_c/\text{cm}^{-1}$ | $\tilde{\nu}_e - \tilde{\nu}_c/10^{-3}\text{cm}^{-1}$ | $I_e/\text{cm}^{-2}\text{atm}^{-1}$ | $I_c/\text{cm}^{-2}\text{atm}^{-1}$ | $I_e - I_c/\%$ | $J''$    | $C''$ | $\alpha''$ | $J'$  | $C'$ | $\alpha'$ |
|--------------------------------|--------------------------------|-------------------------------------------------------|-------------------------------------|-------------------------------------|----------------|----------|-------|------------|-------|------|-----------|
| 5059.875300                    | 5059.873374                    | 1.926                                                 | $0.7033 \times 10^{-4}$             | $0.6612 \times 10^{-4}$             | 6.373          | 5 $F_2$  | 1     | 4          | $F_1$ | 1    |           |
| 5061.286800                    | 5061.296788                    | -9.988                                                | $0.5000 \times 10^{-4}$             | $0.4615 \times 10^{-4}$             | 8.333          | 5 $F_1$  | 1     | 4          | $F_2$ | 2    |           |
| 5064.066500                    | 5064.067038                    | -0.538                                                | $0.2490 \times 10^{-5}$             | $0.2259 \times 10^{-5}$             | 10.215         | 7 $E$    | 1     | 6          | $E$   | 6    |           |
| 5066.154000                    | 5066.163590                    | -9.590                                                | $0.6740 \times 10^{-5}$             | $0.4930 \times 10^{-5}$             | 36.715         | 7 $F_1$  | 1     | 7          | $F_2$ | 2    |           |
| 5066.686000                    | 5066.696731                    | -10.731                                               | $0.6970 \times 10^{-5}$             | $0.5692 \times 10^{-5}$             | 22.461         | 7 $F_2$  | 1     | 7          | $F_1$ | 3    |           |
| 5066.702800                    | 5066.705184                    | -2.384                                                | $0.9057 \times 10^{-5}$             | $0.8052 \times 10^{-5}$             | 12.483         | 6 $F_2$  | 2     | 5          | $F_1$ | 6    |           |
| 5066.724700                    | 5066.726900                    | -2.200                                                | $0.1447 \times 10^{-4}$             | $0.1414 \times 10^{-4}$             | 2.338          | 6 $F_2$  | 1     | 5          | $F_1$ | 6    |           |
| 5067.075500                    | 5067.068678                    | 6.822                                                 | $0.6285 \times 10^{-5}$             | $0.6979 \times 10^{-5}$             | -9.950         | 11 $F_2$ | 1     | 11         | $F_1$ | 11   |           |
| 5069.167800                    | 5069.166799                    | 1.001                                                 | $0.6466 \times 10^{-4}$             | $0.6049 \times 10^{-4}$             | 6.889          | 4 $F_2$  | 1     | 3          | $F_1$ | 1    |           |
| 5069.761300                    | 5069.761865                    | -0.565                                                | $0.1101 \times 10^{-4}$             | $0.1001 \times 10^{-4}$             | 10.024         | 6 $E$    | 1     | 5          | $E$   | 4    |           |
| 5073.583700                    | 5073.562808                    | 20.892                                                | $0.1189 \times 10^{-4}$             | $0.1158 \times 10^{-4}$             | 2.638          | 11 $A_2$ | 1     | 11         | $A_1$ | 4    |           |
| 5074.470400                    | 5074.483258                    | -12.858                                               | $0.4259 \times 10^{-5}$             | $0.3954 \times 10^{-5}$             | 7.709          | 6 $F_1$  | 1     | 5          | $F_2$ | 6    |           |
| 5076.606800                    | 5076.603173                    | 3.627                                                 | $0.1393 \times 10^{-4}$             | $0.1234 \times 10^{-4}$             | 12.897         | 10 $F_2$ | 1     | 10         | $F_1$ | 9    |           |
| 5076.850600                    | 5076.847695                    | 2.905                                                 | $0.1837 \times 10^{-4}$             | $0.2135 \times 10^{-4}$             | -13.943        | 10 $A_2$ | 1     | 10         | $A_1$ | 4    |           |
| 5077.010800                    | 5077.011756                    | -0.956                                                | $0.1857 \times 10^{-5}$             | $0.1882 \times 10^{-5}$             | -1.314         | 6 $F_2$  | 2     | 5          | $F_1$ | 8    |           |
| 5077.140900                    | 5077.138064                    | 2.836                                                 | $0.5309 \times 10^{-4}$             | $0.4492 \times 10^{-4}$             | 18.197         | 4 $E$    | 1     | 3          | $E$   | 1    |           |
| 5077.295100                    | 5077.294687                    | 0.413                                                 | $0.3445 \times 10^{-4}$             | $0.3146 \times 10^{-4}$             | 9.488          | 5 $F_1$  | 1     | 4          | $F_2$ | 4    |           |
| 5077.644000                    | 5077.649092                    | -5.092                                                | $0.7464 \times 10^{-5}$             | $0.5673 \times 10^{-5}$             | 31.570         | 6 $F_2$  | 1     | 6          | $F_1$ | 1    |           |
| 5078.406600                    | 5078.414485                    | -7.885                                                | $0.2095 \times 10^{-4}$             | $0.1645 \times 10^{-4}$             | 27.394         | 6 $A_2$  | 1     | 6          | $A_1$ | 1    |           |
| 5078.888600                    | 5078.889309                    | -0.709                                                | $0.4834 \times 10^{-4}$             | $0.4483 \times 10^{-4}$             | 7.830          | 4 $F_1$  | 1     | 3          | $F_2$ | 2    |           |
| 5080.740900                    | 5080.739163                    | 1.737                                                 | $0.8611 \times 10^{-5}$             | $0.8022 \times 10^{-5}$             | 7.337          | 5 $E$    | 1     | 4          | $E$   | 3    |           |
| 5081.514300                    | 5081.506717                    | 7.583                                                 | $0.1098 \times 10^{-4}$             | $0.1139 \times 10^{-4}$             | -3.559         | 10 $F_2$ | 2     | 10         | $F_1$ | 10   |           |
| 5082.224400                    | 5082.216935                    | 7.465                                                 | $0.9580 \times 10^{-5}$             | $0.9968 \times 10^{-5}$             | -3.894         | 10 $F_1$ | 1     | 10         | $F_2$ | 10   |           |
| 5082.564500                    | 5082.559619                    | 4.881                                                 | $0.6033 \times 10^{-5}$             | $0.5095 \times 10^{-5}$             | 18.412         | 5 $F_1$  | 2     | 4          | $F_2$ | 5    |           |
| 5083.254200                    | 5083.244444                    | 9.756                                                 | $0.1647 \times 10^{-4}$             | $0.1800 \times 10^{-4}$             | -8.507         | 10 $A_1$ | 1     | 10         | $A_2$ | 3    |           |
| 5083.566700                    | 5083.564616                    | 2.084                                                 | $0.2129 \times 10^{-5}$             | $0.1804 \times 10^{-5}$             | 18.011         | 7 $F_1$  | 2     | 6          | $F_2$ | 11   |           |
| 5085.516500                    | 5085.516895                    | -0.395                                                | $0.1759 \times 10^{-4}$             | $0.2055 \times 10^{-4}$             | -14.404        | 9 $F_1$  | 1     | 9          | $F_2$ | 8    |           |
| 5086.578400                    | 5086.571557                    | 6.843                                                 | $0.1546 \times 10^{-4}$             | $0.1986 \times 10^{-4}$             | -22.146        | 9 $F_2$  | 1     | 9          | $F_1$ | 9    |           |
| 5086.686800                    | 5086.682059                    | 4.741                                                 | $0.1425 \times 10^{-3}$             | $0.1353 \times 10^{-3}$             | 5.343          | 4 $A_1$  | 1     | 3          | $A_2$ | 2    |           |
| 5088.213800                    | 5088.210644                    | 3.156                                                 | $0.1148 \times 10^{-4}$             | $0.4129 \times 10^{-5}$             | 178.002        | 8 $A_1$  | 1     | 8          | $A_2$ | 2    |           |
| 5088.726600                    | 5088.730605                    | -4.005                                                | $0.5194 \times 10^{-5}$             | $0.3412 \times 10^{-5}$             | 52.206         | 5 $F_1$  | 1     | 5          | $F_2$ | 1    |           |
| 5089.420900                    | 5089.424855                    | -3.955                                                | $0.1032 \times 10^{-4}$             | $0.8277 \times 10^{-5}$             | 24.679         | 5 $F_2$  | 1     | 5          | $F_1$ | 1    |           |
| 5089.487800                    | 5089.488331                    | -0.531                                                | $0.1142 \times 10^{-4}$             | $0.1211 \times 10^{-4}$             | -5.720         | 9 $E$    | 1     | 9          | $E$   | 6    |           |
| 5089.816800                    | 5089.813718                    | 3.082                                                 | $0.1040 \times 10^{-3}$             | $0.9578 \times 10^{-4}$             | 8.582          | 3 $A_2$  | 1     | 2          | $A_1$ | 1    |           |
| 5090.116100                    | 5090.114512                    | 1.588                                                 | $0.1489 \times 10^{-4}$             | $0.1594 \times 10^{-4}$             | -6.583         | 9 $F_1$  | 2     | 9          | $F_2$ | 9    |           |
| 5091.557300                    | 5091.555350                    | 1.950                                                 | $0.2434 \times 10^{-4}$             | $0.2200 \times 10^{-4}$             | 10.649         | 4 $F_1$  | 1     | 3          | $F_2$ | 3    |           |
| 5092.853000                    | 5092.850412                    | 2.588                                                 | $0.1528 \times 10^{-5}$             | $0.1147 \times 10^{-5}$             | 33.232         | 6 $F_1$  | 1     | 5          | $F_2$ | 8    |           |
| 5093.565700                    | 5093.561322                    | 4.378                                                 | $0.1183 \times 10^{-4}$             | $0.1022 \times 10^{-4}$             | 15.711         | 6 $A_1$  | 1     | 5          | $A_2$ | 3    |           |
| 5093.764200                    | 5093.766603                    | -2.403                                                | $0.1883 \times 10^{-5}$             | $0.1883 \times 10^{-5}$             | 0.015          | 5 $E$    | 1     | 4          | $E$   | 4    |           |
| 5093.890500                    | 5093.888250                    | 2.250                                                 | $0.3068 \times 10^{-5}$             | $0.2687 \times 10^{-5}$             | 14.190         | 4 $F_2$  | 1     | 3          | $F_1$ | 3    |           |
| 5094.113900                    | 5094.110122                    | 3.778                                                 | $0.6028 \times 10^{-4}$             | $0.5598 \times 10^{-4}$             | 7.681          | 3 $F_2$  | 1     | 2          | $F_1$ | 1    |           |
| 5095.258900                    | 5095.274206                    | -15.306                                               | $0.3660 \times 10^{-4}$             | $0.4841 \times 10^{-4}$             | -24.401        | 8 $A_1$  | 1     | 8          | $A_2$ | 3    |           |
| 5095.919200                    | 5095.918289                    | 0.911                                                 | $0.2034 \times 10^{-4}$             | $0.2678 \times 10^{-4}$             | -24.057        | 8 $F_1$  | 1     | 8          | $F_2$ | 8    |           |
| 5096.335100                    | 5096.320600                    | 14.500                                                | $0.2169 \times 10^{-5}$             | $0.1769 \times 10^{-5}$             | 22.596         | 8 $E$    | 2     | 8          | $E$   | 5    |           |
| 5096.420100                    | 5096.406242                    | 13.858                                                | $0.1337 \times 10^{-4}$             | $0.1695 \times 10^{-4}$             | -21.113        | 8 $E$    | 1     | 8          | $E$   | 5    |           |
| 5096.926600                    | 5096.927372                    | -0.772                                                | $0.1670 \times 10^{-4}$             | $0.1038 \times 10^{-4}$             | 60.921         | 7 $F_1$  | 1     | 7          | $F_2$ | 5    |           |
| 5097.446000                    | 5097.448378                    | -2.378                                                | $0.2481 \times 10^{-4}$             | $0.2554 \times 10^{-4}$             | -2.867         | 8 $F_2$  | 1     | 8          | $F_1$ | 7    |           |
| 5098.578800                    | 5098.576761                    | 2.039                                                 | $0.4037 \times 10^{-5}$             | $0.3967 \times 10^{-5}$             | 1.760          | 5 $F_2$  | 1     | 4          | $F_1$ | 5    |           |
| 5100.128800                    | 5100.130011                    | -1.211                                                | $0.4484 \times 10^{-5}$             | $0.3644 \times 10^{-5}$             | 23.054         | 4 $F_1$  | 1     | 4          | $F_2$ | 1    |           |
| 5100.474800                    | 5100.469197                    | 5.603                                                 | $0.7860 \times 10^{-4}$             | $0.6762 \times 10^{-4}$             | 16.243         | 3 $F_1$  | 1     | 2          | $F_2$ | 2    |           |

Table II (continued).

| $\tilde{\nu}_e/\text{cm}^{-1}$ | $\tilde{\nu}_c/\text{cm}^{-1}$ | $\tilde{\nu}_e - \tilde{\nu}_c/10^{-3}\text{cm}^{-1}$ | $I_e/\text{cm}^{-2}\text{atm}^{-1}$ | $I_c/\text{cm}^{-2}\text{atm}^{-1}$ | $I_e - I_c/\%$ | $J''$ | $C''$ | $\alpha''$ | $J'$ | $C'$  | $\alpha'$ |
|--------------------------------|--------------------------------|-------------------------------------------------------|-------------------------------------|-------------------------------------|----------------|-------|-------|------------|------|-------|-----------|
| 5103.360600                    | 5103.358118                    | 2.482                                                 | $0.5240 \times 10^{-5}$             | $0.5764 \times 10^{-5}$             | -9.085         | 4     | $F_2$ | 1          | 3    | $F_1$ | 4         |
| 5104.046600                    | 5104.043892                    | 2.708                                                 | $0.5490 \times 10^{-5}$             | $0.5376 \times 10^{-5}$             | 2.125          | 4     | $E$   | 1          | 3    | $E$   | 2         |
| 5104.281600                    | 5104.283623                    | -2.023                                                | $0.5906 \times 10^{-4}$             | $0.5788 \times 10^{-4}$             | 2.047          | 7     | $A_2$ | 1          | 7    | $A_1$ | 2         |
| 5104.621100                    | 5104.614078                    | 7.022                                                 | $0.2772 \times 10^{-5}$             | $0.1794 \times 10^{-5}$             | 54.552         | 5     | $E$   | 1          | 5    | $E$   | 1         |
| 5105.862500                    | 5105.868002                    | -5.502                                                | $0.3021 \times 10^{-5}$             | $0.2660 \times 10^{-5}$             | 13.574         | 5     | $F_2$ | 1          | 5    | $F_1$ | 3         |
| 5106.367000                    | 5106.364219                    | 2.781                                                 | $0.2072 \times 10^{-4}$             | $0.2646 \times 10^{-4}$             | -21.703        | 7     | $F_1$ | 1          | 7    | $F_2$ | 6         |
| 5111.071100                    | 5111.069957                    | 1.143                                                 | $0.4056 \times 10^{-5}$             | $0.3605 \times 10^{-5}$             | 12.501         | 3     | $F_2$ | 1          | 3    | $F_1$ | 1         |
| 5112.114800                    | 5112.090171                    | 24.629                                                | $0.1427 \times 10^{-4}$             | $0.9586 \times 10^{-5}$             | 48.866         | 6     | $F_2$ | 2          | 6    | $F_1$ | 5         |
| 5112.088000                    | 5112.093434                    | -5.434                                                |                                     | $0.2522 \times 10^{-4}$             |                | 5     | $F_1$ | 1          | 5    | $F_2$ | 3         |
| 5112.805300                    | 5112.801493                    | 3.807                                                 | $0.9257 \times 10^{-5}$             | $0.8712 \times 10^{-5}$             | 6.261          | 3     | $F_2$ | 1          | 2    | $F_1$ | 2         |
| 5113.575400                    | 5113.570316                    | 5.084                                                 | $0.4722 \times 10^{-4}$             | $0.4401 \times 10^{-4}$             | 7.291          | 2     | $F_2$ | 1          | 1    | $F_1$ | 2         |
| 5113.636500                    | 5113.646409                    | -9.909                                                | $0.9421 \times 10^{-5}$             | $0.8530 \times 10^{-5}$             | 10.442         | 4     | $F_1$ | 1          | 4    | $F_2$ | 2         |
| 5114.934900                    | 5114.929087                    | 5.813                                                 | $0.4895 \times 10^{-5}$             | $0.4022 \times 10^{-5}$             | 21.703         | 5     | $F_2$ | 1          | 4    | $F_1$ | 7         |
| 5117.403900                    | 5117.399729                    | 4.171                                                 | $0.3591 \times 10^{-5}$             | $0.2842 \times 10^{-5}$             | 26.351         | 3     | $F_1$ | 1          | 2    | $F_2$ | 3         |
| 5117.864000                    | 5117.857816                    | 6.184                                                 | $0.3591 \times 10^{-4}$             | $0.3322 \times 10^{-4}$             | 8.091          | 2     | $E$   | 1          | 1    | $E$   | 1         |
| 5118.688600                    | 5118.689395                    | -0.795                                                | $0.1228 \times 10^{-3}$             | $0.9214 \times 10^{-4}$             | 33.273         | 4     | $A_1$ | 1          | 4    | $A_2$ | 1         |
| 5120.787500                    | 5120.788224                    | -0.724                                                | $0.1463 \times 10^{-4}$             | $0.1234 \times 10^{-4}$             | 18.582         | 3     | $F_1$ | 1          | 3    | $F_2$ | 2         |
| 5122.285100                    | 5122.279805                    | 5.295                                                 | $0.2145 \times 10^{-5}$             | $0.2248 \times 10^{-5}$             | -4.573         | 7     | $F_1$ | 2          | 6    | $F_2$ | 16        |
| 5122.952700                    | 5122.945111                    | 7.589                                                 | $0.2362 \times 10^{-5}$             | $0.2598 \times 10^{-5}$             | -9.089         | 7     | $E$   | 1          | 6    | $E$   | 10        |
| 5124.717200                    | 5124.703164                    | 14.036                                                | $0.6397 \times 10^{-5}$             | $0.6269 \times 10^{-5}$             | 2.036          | 10    | $A_2$ | 1          | 10   | $A_1$ | 7         |
| 5125.544400                    | 5125.544568                    | -0.168                                                |                                     | $0.3944 \times 10^{-5}$             |                | 2     | $F_2$ | 1          | 2    | $F_1$ | 1         |
| 5126.016700                    | 5126.013599                    | 3.101                                                 |                                     | $0.1618 \times 10^{-4}$             |                | 6     | $A_1$ | 1          | 5    | $A_2$ | 4         |
| 5128.512700                    | 5128.506461                    | 6.239                                                 |                                     | $0.2624 \times 10^{-5}$             |                | 8     | $F_1$ | 2          | 8    | $F_2$ | 12        |
| 5129.430500                    | 5129.430347                    | 0.153                                                 | $0.2248 \times 10^{-4}$             | $0.2514 \times 10^{-4}$             | -10.593        | 7     | $F_2$ | 2          | 7    | $F_1$ | 10        |
| 5129.468100                    | 5129.468365                    | -0.265                                                | $0.7337 \times 10^{-5}$             | $0.5614 \times 10^{-5}$             | 30.692         | 7     | $F_2$ | 1          | 7    | $F_1$ | 10        |
| 5129.512700                    | 5129.514008                    | -1.308                                                | $0.2674 \times 10^{-4}$             | $0.2150 \times 10^{-4}$             | 24.372         | 5     | $F_2$ | 1          | 5    | $F_1$ | 6         |
| 5129.644100                    | 5129.644308                    | -0.208                                                |                                     | $0.2167 \times 10^{-4}$             |                | 4     | $F_1$ | 1          | 4    | $F_2$ | 4         |
| 5129.962400                    | 5129.961299                    | 1.101                                                 | $0.8734 \times 10^{-4}$             | $0.8766 \times 10^{-4}$             | -0.361         | 6     | $A_2$ | 1          | 6    | $A_1$ | 4         |
| 5129.997500                    | 5129.988580                    | 8.920                                                 | $0.2708 \times 10^{-4}$             | $0.2648 \times 10^{-4}$             | 2.265          | 9     | $A_1$ | 1          | 9    | $A_2$ | 5         |
| 5130.030300                    | 5130.034504                    | -4.204                                                |                                     | $0.2540 \times 10^{-4}$             |                | 7     | $E$   | 1          | 7    | $E$   | 6         |
| 5130.231500                    | 5130.236997                    | -5.497                                                | $0.2804 \times 10^{-4}$             | $0.2637 \times 10^{-4}$             | 6.325          | 7     | $F_1$ | 2          | 7    | $F_2$ | 9         |
| 5130.680200                    | 5130.672738                    | 7.462                                                 | $0.1720 \times 10^{-5}$             | $0.1689 \times 10^{-5}$             | 1.806          | 7     | $E$   | 1          | 6    | $E$   | 11        |
| 5130.764400                    | 5130.767351                    | -2.951                                                | $0.3780 \times 10^{-4}$             | $0.3661 \times 10^{-4}$             | 3.252          | 6     | $F_2$ | 2          | 6    | $F_1$ | 7         |
| 5130.767870                    | 5130.767351                    | 0.519                                                 |                                     | $0.3661 \times 10^{-4}$             |                | 6     | $F_2$ | 2          | 6    | $F_1$ | 7         |
| 5130.786000                    | 5130.789068                    | -3.068                                                | $0.1080 \times 10^{-4}$             | $0.1182 \times 10^{-4}$             | -8.627         | 6     | $F_2$ | 1          | 6    | $F_1$ | 7         |
| 5130.845400                    | 5130.842691                    | 2.709                                                 | $0.7236 \times 10^{-5}$             | $0.7137 \times 10^{-5}$             | 1.380          | 5     | $F_1$ | 2          | 4    | $F_2$ | 9         |
| 5131.787000                    | 5131.791238                    | -4.238                                                | $0.4056 \times 10^{-4}$             | $0.3958 \times 10^{-4}$             | 2.476          | 6     | $F_1$ | 1          | 6    | $F_2$ | 8         |
| 5132.538200                    | 5132.538121                    | 0.079                                                 | $0.3356 \times 10^{-4}$             | $0.3074 \times 10^{-4}$             | 9.179          | 5     | $E$   | 1          | 5    | $E$   | 4         |
| 5132.882600                    | 5132.876454                    | 6.146                                                 | $0.1902 \times 10^{-4}$             | $0.1779 \times 10^{-4}$             | 6.936          | 1     | $F_1$ | 1          | 0    | $F_2$ | 1         |
| 5133.102000                    | 5133.100311                    | 1.689                                                 | $0.3325 \times 10^{-4}$             | $0.2909 \times 10^{-4}$             | 14.298         | 4     | $E$   | 1          | 4    | $E$   | 3         |
| 5133.456400                    | 5133.454264                    | 2.136                                                 | $0.5213 \times 10^{-4}$             | $0.4649 \times 10^{-4}$             | 12.121         | 3     | $F_1$ | 1          | 3    | $F_2$ | 3         |
| 5134.412500                    | 5134.411704                    | 0.796                                                 | $0.1764 \times 10^{-4}$             | $0.1792 \times 10^{-4}$             | -1.539         | 7     | $F_1$ | 2          | 7    | $F_2$ | 11        |
| 5134.927000                    | 5134.923821                    | 3.179                                                 | $0.2260 \times 10^{-4}$             | $0.2133 \times 10^{-4}$             | 5.968          | 4     | $F_1$ | 1          | 4    | $F_2$ | 5         |
| 5135.203910                    | 5135.215060                    | -11.150                                               |                                     | $0.1054 \times 10^{-3}$             |                | 6     | $A_1$ | 1          | 6    | $A_2$ | 3         |
| 5135.291600                    | 5135.290982                    | 0.618                                                 | $0.6750 \times 10^{-5}$             | $0.5522 \times 10^{-5}$             | 22.235         | 4     | $E$   | 1          | 3    | $E$   | 4         |
| 5135.794000                    | 5135.791409                    | 2.591                                                 | $0.3931 \times 10^{-4}$             | $0.3463 \times 10^{-4}$             | 13.511         | 3     | $F_2$ | 1          | 3    | $F_1$ | 3         |
| 5135.949600                    | 5135.947268                    | 2.332                                                 | $0.2574 \times 10^{-5}$             | $0.2624 \times 10^{-5}$             | -1.922         | 4     | $F_2$ | 1          | 3    | $F_1$ | 7         |
| 5136.179300                    | 5136.183693                    | -4.393                                                | $0.2679 \times 10^{-5}$             | $0.6640 \times 10^{-5}$             | -59.654        | 7     | $A_2$ | 1          | 8    | $A_1$ | 2         |
| 5136.386000                    | 5136.395280                    | -9.280                                                | $0.2330 \times 10^{-5}$             | $0.2090 \times 10^{-5}$             | 11.489         | 6     | $F_1$ | 1          | 5    | $F_2$ | 12        |
| 5137.272900                    | 5137.285588                    | -12.688                                               | $0.6065 \times 10^{-4}$             | $0.5971 \times 10^{-4}$             | 1.571          | 5     | $F_1$ | 2          | 5    | $F_2$ | 6         |

Table II (continued).

| $\tilde{\nu}_e/\text{cm}^{-1}$ | $\tilde{\nu}_c/\text{cm}^{-1}$ | $\tilde{\nu}_e - \tilde{\nu}_c/10^{-3}\text{cm}^{-1}$ | $I_e/\text{cm}^{-2}\text{atm}^{-1}$ | $I_c/\text{cm}^{-2}\text{atm}^{-1}$ | $I_e - I_c/\%$ | $J''$ | $C''$ | $\alpha''$ | $J'$ | $C'$  | $\alpha'$ |
|--------------------------------|--------------------------------|-------------------------------------------------------|-------------------------------------|-------------------------------------|----------------|-------|-------|------------|------|-------|-----------|
| 5137.527200                    | 5137.524397                    | 2.803                                                 | $0.4007 \times 10^{-4}$             | $0.3689 \times 10^{-4}$             | 8.625          | 2     | $E$   | 1          | 2    | $E$   | 2         |
| 5137.867700                    | 5137.858138                    | 9.562                                                 |                                     | $0.1990 \times 10^{-5}$             |                | 7     | $F_1$ | 2          | 6    | $F_2$ | 18        |
| 5139.318000                    | 5139.318611                    | -0.611                                                | $0.6368 \times 10^{-4}$             | $0.5714 \times 10^{-4}$             | 11.444         | 4     | $F_2$ | 1          | 4    | $F_1$ | 4         |
| 5139.820300                    | 5139.820581                    | -0.281                                                | $0.3878 \times 10^{-5}$             | $0.4397 \times 10^{-5}$             | -11.810        | 5     | $F_2$ | 1          | 5    | $F_1$ | 8         |
| 5139.984400                    | 5139.986909                    | -2.509                                                | $0.6943 \times 10^{-5}$             | $0.6078 \times 10^{-5}$             | 14.238         | 5     | $F_1$ | 2          | 4    | $F_2$ | 10        |
| 5140.323500                    | 5140.324967                    | -1.467                                                | $0.3126 \times 10^{-5}$             | $0.9953 \times 10^{-6}$             | 214.078        | 4     | $A_1$ | 1          | 5    | $A_2$ | 1         |
| 5143.603600                    | 5143.603599                    | 0.001                                                 | $0.1264 \times 10^{-4}$             | $0.1269 \times 10^{-4}$             | -0.432         | 4     | $F_2$ | 1          | 3    | $F_1$ | 8         |
| 5144.028400                    | 5144.019555                    | 8.845                                                 | $0.2379 \times 10^{-5}$             | $0.3103 \times 10^{-5}$             | -23.325        | 6     | $A_1$ | 1          | 5    | $A_2$ | 5         |
| 5144.239600                    | 5144.235938                    | 3.662                                                 | $0.6730 \times 10^{-4}$             | $0.6238 \times 10^{-4}$             | 7.891          | 2     | $F_2$ | 1          | 2    | $F_1$ | 2         |
| 5144.885300                    | 5144.884990                    | 0.310                                                 | $0.8785 \times 10^{-5}$             | $0.8691 \times 10^{-5}$             | 1.083          | 3     | $F_2$ | 1          | 2    | $F_1$ | 3         |
| 5145.138500                    | 5145.133884                    | 4.616                                                 | $0.4915 \times 10^{-4}$             | $0.4581 \times 10^{-4}$             | 7.286          | 1     | $F_1$ | 1          | 1    | $F_2$ | 1         |
| 5145.263100                    | 5145.261277                    | 1.823                                                 | $0.3679 \times 10^{-4}$             | $0.3479 \times 10^{-4}$             | 5.740          | 3     | $F_2$ | 1          | 3    | $F_1$ | 4         |
| 5146.125100                    | 5146.127751                    | -2.651                                                | $0.1759 \times 10^{-4}$             | $0.2058 \times 10^{-4}$             | -14.541        | 4     | $E$   | 1          | 4    | $E$   | 4         |
| 5146.618800                    | 5146.617551                    | 1.249                                                 | $0.1586 \times 10^{-3}$             | $0.1488 \times 10^{-3}$             | 6.576          | 3     | $A_2$ | 1          | 3    | $A_1$ | 1         |
| 5147.249900                    | 5147.249336                    | 0.564                                                 | $0.2755 \times 10^{-4}$             | $0.2744 \times 10^{-4}$             | 0.398          | 3     | $A_2$ | 1          | 2    | $A_1$ | 2         |
| 5150.031400                    | 5150.031068                    | 0.332                                                 | $0.5903 \times 10^{-5}$             | $0.6115 \times 10^{-5}$             | -3.470         | 2     | $F_2$ | 1          | 1    | $F_1$ | 3         |
| 5150.927100                    | 5150.924664                    | 2.436                                                 | $0.5940 \times 10^{-5}$             | $0.4258 \times 10^{-5}$             | 39.491         | 4     | $F_2$ | 1          | 4    | $F_1$ | 5         |
| 5152.866800                    | 5152.859676                    | 7.124                                                 | $0.4073 \times 10^{-5}$             | $0.4972 \times 10^{-5}$             | -18.079        | 4     | $F_1$ | 1          | 4    | $F_2$ | 6         |
| 5153.622000                    | 5153.618590                    | 3.410                                                 | $0.4015 \times 10^{-4}$             | $0.5261 \times 10^{-4}$             | -23.680        | 4     | $A_1$ | 1          | 4    | $A_2$ | 2         |
| 5154.303700                    | 5154.303017                    | 0.683                                                 | $0.2508 \times 10^{-4}$             | $0.2430 \times 10^{-4}$             | 3.192          | 4     | $F_2$ | 1          | 4    | $F_1$ | 6         |
| 5155.654900                    | 5155.652741                    | 2.159                                                 | $0.1933 \times 10^{-4}$             | $0.1699 \times 10^{-4}$             | 13.769         | 5     | $F_1$ | 2          | 5    | $F_2$ | 8         |
| 5155.668500                    | 5155.667321                    | 1.179                                                 | $0.4553 \times 10^{-5}$             | $0.6296 \times 10^{-5}$             | -27.679        | 5     | $F_1$ | 1          | 5    | $F_2$ | 8         |
| 5156.327300                    | 5156.329676                    | -2.376                                                | $0.2500 \times 10^{-4}$             | $0.2598 \times 10^{-4}$             | -3.761         | 5     | $E$   | 1          | 5    | $E$   | 6         |
| 5156.804200                    | 5156.802017                    | 2.183                                                 | $0.1242 \times 10^{-4}$             | $0.1191 \times 10^{-4}$             | 4.289          | 6     | $F_1$ | 1          | 6    | $F_2$ | 11        |
| 5157.111300                    | 5157.118085                    | -6.785                                                | $0.2515 \times 10^{-4}$             | $0.2386 \times 10^{-4}$             | 5.418          | 6     | $F_2$ | 2          | 6    | $F_1$ | 10        |
| 5157.154500                    | 5157.153169                    | 1.331                                                 |                                     | $0.2962 \times 10^{-5}$             |                | 9     | $A_1$ | 1          | 9    | $A_2$ | 6         |
| 5157.715700                    | 5157.709819                    | 5.881                                                 | $0.2002 \times 10^{-4}$             | $0.2375 \times 10^{-4}$             | -15.704        | 4     | $F_1$ | 1          | 4    | $F_2$ | 7         |
| 5157.772300                    | 5157.771233                    | 1.067                                                 | $0.6627 \times 10^{-5}$             | $0.5370 \times 10^{-5}$             | 23.408         | 8     | $F_1$ | 2          | 8    | $F_2$ | 15        |
| 5157.797000                    | 5157.802392                    | -5.392                                                | $0.1250 \times 10^{-4}$             | $0.1210 \times 10^{-4}$             | 3.309          | 7     | $F_2$ | 2          | 7    | $F_1$ | 13        |
| 5158.333500                    | 5158.351194                    | -17.694                                               | $0.4085 \times 10^{-4}$             | $0.3740 \times 10^{-4}$             | 9.223          | 7     | $A_2$ | 1          | 7    | $A_1$ | 4         |
| 5158.505900                    | 5158.518023                    | -12.123                                               | $0.4325 \times 10^{-5}$             | $0.4017 \times 10^{-5}$             | 7.669          | 9     | $E$   | 1          | 9    | $E$   | 12        |
| 5161.095800                    | 5161.090534                    | 5.266                                                 | $0.8790 \times 10^{-4}$             | $0.8032 \times 10^{-4}$             | 9.432          | 0     | $A_1$ | 1          | 1    | $A_2$ | 1         |
| 5162.497300                    | 5162.491087                    | 6.213                                                 | $0.1722 \times 10^{-5}$             | $0.1197 \times 10^{-5}$             | 43.869         | 3     | $F_1$ | 1          | 2    | $F_2$ | 6         |
| 5162.886100                    | 5162.902046                    | -15.946                                               | $0.6307 \times 10^{-5}$             | $0.4295 \times 10^{-5}$             | 46.851         | 6     | $A_1$ | 1          | 7    | $A_2$ | 2         |
| 5164.612400                    | 5164.614664                    | -2.264                                                |                                     | $0.5201 \times 10^{-6}$             |                | 7     | $A_2$ | 1          | 6    | $A_1$ | 7         |
| 5165.827600                    | 5165.828216                    | -0.616                                                | $0.4472 \times 10^{-5}$             | $0.2042 \times 10^{-5}$             | 119.017        | 7     | $E$   | 1          | 6    | $E$   | 14        |
| 5166.234600                    | 5166.235484                    | -0.884                                                | $0.2101 \times 10^{-5}$             | $0.6273 \times 10^{-6}$             | 234.927        | 7     | $F_1$ | 1          | 6    | $F_2$ | 20        |
| 5166.501400                    | 5166.498466                    | 2.934                                                 | $0.1664 \times 10^{-4}$             | $0.1912 \times 10^{-4}$             | -12.992        | 3     | $F_1$ | 1          | 3    | $F_2$ | 5         |
| 5167.227500                    | 5167.225855                    | 1.645                                                 | $0.1067 \times 10^{-4}$             | $0.6136 \times 10^{-5}$             | 73.882         | 2     | $F_2$ | 1          | 3    | $F_1$ | 3         |
| 5167.281700                    | 5167.276990                    | 4.710                                                 | $0.8876 \times 10^{-5}$             | $0.1009 \times 10^{-4}$             | -12.067        | 4     | $F_2$ | 1          | 4    | $F_1$ | 7         |
| 5167.569300                    | 5167.567905                    | 1.395                                                 | $0.4704 \times 10^{-5}$             | $0.1008 \times 10^{-5}$             | 366.885        | 6     | $F_2$ | 2          | 5    | $F_1$ | 16        |
| 5168.444900                    | 5168.444483                    | 0.417                                                 | $0.4868 \times 10^{-5}$             | $0.4985 \times 10^{-5}$             | -2.353         | 1     | $F_1$ | 1          | 1    | $F_2$ | 2         |
| 5169.797700                    | 5169.793845                    | 3.855                                                 | $0.5133 \times 10^{-4}$             | $0.4541 \times 10^{-4}$             | 13.040         | 1     | $F_1$ | 1          | 2    | $F_2$ | 3         |
| 5170.316700                    | 5170.312668                    | 4.032                                                 |                                     | $0.1549 \times 10^{-5}$             |                | 5     | $F_1$ | 2          | 4    | $F_2$ | 12        |
| 5170.652900                    | 5170.654566                    | -1.666                                                | $0.5490 \times 10^{-5}$             | $0.1558 \times 10^{-5}$             | 252.464        | 5     | $E$   | 1          | 4    | $E$   | 9         |
| 5170.731300                    | 5170.725479                    | 5.821                                                 | $0.1998 \times 10^{-4}$             | $0.2192 \times 10^{-4}$             | -8.846         | 3     | $F_2$ | 1          | 3    | $F_1$ | 6         |
| 5172.323000                    | 5172.315993                    | 7.007                                                 | $0.1217 \times 10^{-4}$             | $0.5781 \times 10^{-5}$             | 110.512        | 5     | $F_1$ | 2          | 4    | $F_2$ | 13        |
| 5172.904300                    | 5172.892713                    | 11.587                                                | $0.1489 \times 10^{-5}$             | $0.7025 \times 10^{-6}$             | 111.952        | 4     | $F_1$ | 1          | 3    | $F_2$ | 9         |
| 5173.138800                    | 5173.138404                    | 0.396                                                 | $0.2708 \times 10^{-4}$             | $0.2081 \times 10^{-4}$             | 30.111         | 2     | $E$   | 1          | 2    | $E$   | 3         |
| 5173.781500                    | 5173.782747                    | -1.247                                                | $0.1155 \times 10^{-4}$             | $0.4332 \times 10^{-5}$             | 166.647        | 4     | $F_2$ | 1          | 3    | $F_1$ | 10        |

Table II (continued).

| $\tilde{\nu}_e/\text{cm}^{-1}$ | $\tilde{\nu}_c/\text{cm}^{-1}$ | $\tilde{\nu}_e - \tilde{\nu}_c/10^{-3}\text{cm}^{-1}$ | $I_e/\text{cm}^{-2}\text{atm}^{-1}$ | $I_c/\text{cm}^{-2}\text{atm}^{-1}$ | $I_e - I_c/\%$ | $J''$ | $C''$ | $\alpha''$ | $J'$ | $C'$  | $\alpha'$ |
|--------------------------------|--------------------------------|-------------------------------------------------------|-------------------------------------|-------------------------------------|----------------|-------|-------|------------|------|-------|-----------|
| 5174.107100                    | 5174.106565                    | 0.535                                                 | $0.3858 \times 10^{-5}$             | $0.1661 \times 10^{-5}$             | 132.325        | 5     | $F_2$ | 1          | 4    | $F_1$ | 12        |
| 5175.400500                    | 5175.410994                    | -10.494                                               |                                     | $0.8990 \times 10^{-5}$             |                | 4     | $F_2$ | 1          | 4    | $F_1$ | 8         |
| 5176.319664                    | 5176.319436                    | 0.228                                                 |                                     | $0.1317 \times 10^{-4}$             |                | 2     | $F_2$ | 1          | 2    | $F_1$ | 3         |
| 5176.697600                    | 5176.695723                    | 1.877                                                 |                                     | $0.1540 \times 10^{-5}$             |                | 2     | $F_2$ | 1          | 3    | $F_1$ | 4         |
| 5177.381000                    | 5177.377784                    | 3.216                                                 | $0.1346 \times 10^{-4}$             | $0.6813 \times 10^{-5}$             | 97.574         | 2     | $E$   | 1          | 3    | $E$   | 2         |
| 5177.515700                    | 5177.517950                    | -2.250                                                | $0.1955 \times 10^{-4}$             | $0.2513 \times 10^{-4}$             | -22.216        | 6     | $A_2$ | 1          | 7    | $A_1$ | 2         |
| 5177.580100                    | 5177.590394                    | -10.294                                               | $0.1801 \times 10^{-4}$             | $0.1651 \times 10^{-4}$             | 9.113          | 4     | $E$   | 1          | 4    | $E$   | 6         |
| 5177.851500                    | 5177.850426                    | 1.074                                                 | $0.4159 \times 10^{-5}$             | $0.3753 \times 10^{-5}$             | 10.819         | 3     | $F_2$ | 1          | 3    | $F_1$ | 7         |
| 5178.326000                    | 5178.324175                    | 1.825                                                 | $0.1982 \times 10^{-4}$             | $0.8441 \times 10^{-5}$             | 134.798        | 3     | $A_2$ | 1          | 2    | $A_1$ | 3         |
| 5179.474400                    | 5179.473316                    | 1.084                                                 | $0.2786 \times 10^{-5}$             | $0.3606 \times 10^{-5}$             | -22.743        | 7     | $F_1$ | 2          | 8    | $F_2$ | 8         |
| 5179.549600                    | 5179.545930                    | 3.670                                                 | $0.4589 \times 10^{-5}$             | $0.7205 \times 10^{-5}$             | -36.304        | 6     | $F_1$ | 1          | 7    | $F_2$ | 6         |
| 5179.821000                    | 5179.828022                    | -7.022                                                | $0.1114 \times 10^{-4}$             | $0.1106 \times 10^{-4}$             | 0.699          | 3     | $F_1$ | 1          | 3    | $F_2$ | 6         |
| 5179.985600                    | 5179.971740                    | 13.860                                                | $0.4012 \times 10^{-5}$             | $0.4624 \times 10^{-5}$             | -13.238        | 7     | $E$   | 1          | 8    | $E$   | 5         |
| 5180.212800                    | 5180.215729                    | -2.929                                                | $0.3758 \times 10^{-5}$             | $0.2379 \times 10^{-5}$             | 57.984         | 3     | $F_1$ | 1          | 2    | $F_2$ | 7         |
| 5180.472400                    | 5180.465617                    | 6.783                                                 | $0.2767 \times 10^{-5}$             | $0.2695 \times 10^{-5}$             | 2.655          | 8     | $F_2$ | 2          | 9    | $F_1$ | 9         |
| 5181.033300                    | 5181.030435                    | 2.865                                                 | $0.3772 \times 10^{-5}$             | $0.2755 \times 10^{-5}$             | 36.899         | 9     | $A_2$ | 1          | 10   | $A_1$ | 4         |
| 5181.066800                    | 5181.069669                    | -2.869                                                | $0.5013 \times 10^{-5}$             | $0.6447 \times 10^{-5}$             | -22.245        | 7     | $F_2$ | 2          | 8    | $F_1$ | 7         |
| 5181.105900                    | 5181.107688                    | -1.788                                                | $0.2674 \times 10^{-5}$             | $0.2378 \times 10^{-5}$             | 12.424         | 7     | $F_2$ | 1          | 8    | $F_1$ | 7         |
| 5181.222000                    | 5181.221770                    | 0.230                                                 | $0.2508 \times 10^{-4}$             | $0.2874 \times 10^{-4}$             | -12.728        | 3     | $F_2$ | 1          | 4    | $F_1$ | 4         |
| 5184.116700                    | 5184.115001                    | 1.699                                                 | $0.4783 \times 10^{-5}$             | $0.4294 \times 10^{-5}$             | 11.395         | 8     | $F_1$ | 2          | 9    | $F_2$ | 9         |
| 5184.509100                    | 5184.508908                    | 0.192                                                 | $0.7339 \times 10^{-5}$             | $0.7859 \times 10^{-5}$             | -6.613         | 3     | $F_1$ | 1          | 3    | $F_2$ | 7         |
| 5184.611200                    | 5184.608932                    | 2.268                                                 | $0.6258 \times 10^{-5}$             | $0.3487 \times 10^{-5}$             | 79.458         | 2     | $F_2$ | 1          | 1    | $F_1$ | 4         |
| 5184.898800                    | 5184.899269                    | -0.469                                                | $0.1228 \times 10^{-4}$             | $0.1398 \times 10^{-4}$             | -12.136        | 4     | $E$   | 1          | 5    | $E$   | 4         |
| 5185.459500                    | 5185.458567                    | 0.933                                                 | $0.1429 \times 10^{-3}$             | $0.1575 \times 10^{-3}$             | -9.298         | 3     | $A_2$ | 1          | 4    | $A_1$ | 3         |
| 5186.555000                    | 5186.546228                    | 8.772                                                 | $0.2335 \times 10^{-5}$             | $0.1281 \times 10^{-5}$             | 82.305         | 9     | $F_1$ | 3          | 10   | $F_2$ | 10        |
| 5187.202400                    | 5187.199764                    | 2.636                                                 | $0.8668 \times 10^{-4}$             | $0.9540 \times 10^{-4}$             | -9.137         | 2     | $F_2$ | 1          | 3    | $F_1$ | 5         |
| 5188.035700                    | 5188.035399                    | 0.301                                                 | $0.7104 \times 10^{-4}$             | $0.5958 \times 10^{-4}$             | 19.235         | 3     | $A_2$ | 1          | 3    | $A_1$ | 2         |
| 5188.114300                    | 5188.113755                    | 0.545                                                 | $0.2151 \times 10^{-4}$             | $0.1638 \times 10^{-4}$             | 31.333         | 2     | $F_2$ | 1          | 2    | $F_1$ | 4         |
| 5189.636700                    | 5189.649789                    | -13.089                                               | $0.6576 \times 10^{-5}$             | $0.6657 \times 10^{-5}$             | -1.224         | 4     | $F_1$ | 1          | 5    | $F_2$ | 6         |
| 5190.973300                    | 5190.969111                    | 4.189                                                 | $0.6732 \times 10^{-4}$             | $0.7408 \times 10^{-4}$             | -9.129         | 2     | $E$   | 1          | 3    | $E$   | 3         |
| 5191.046500                    | 5191.046468                    | 0.032                                                 |                                     | $0.3313 \times 10^{-4}$             |                | 1     | $F_1$ | 1          | 2    | $F_2$ | 4         |
| 5192.168400                    | 5192.168483                    | -0.083                                                | $0.6693 \times 10^{-4}$             | $0.7031 \times 10^{-4}$             | -4.806         | 4     | $F_2$ | 1          | 5    | $F_1$ | 8         |
| 5192.347500                    | 5192.351111                    | -3.611                                                | $0.1472 \times 10^{-4}$             | $0.1682 \times 10^{-4}$             | -12.502        | 4     | $F_1$ | 1          | 4    | $F_2$ | 10        |
| 5192.830000                    | 5192.827823                    | 2.177                                                 | $0.3699 \times 10^{-4}$             | $0.3392 \times 10^{-4}$             | 9.049          | 3     | $F_2$ | 1          | 4    | $F_1$ | 5         |
| 5193.407400                    | 5193.406010                    | 1.390                                                 | $0.2892 \times 10^{-4}$             | $0.2993 \times 10^{-4}$             | -3.381         | 1     | $F_1$ | 1          | 2    | $F_2$ | 5         |
| 5193.575500                    | 5193.576176                    | -0.676                                                |                                     | $0.5957 \times 10^{-5}$             |                | 5     | $F_2$ | 1          | 6    | $F_1$ | 7         |
| 5193.968300                    | 5193.965198                    | 3.102                                                 | $0.1406 \times 10^{-4}$             | $0.9046 \times 10^{-5}$             | 55.423         | 3     | $F_2$ | 1          | 3    | $F_1$ | 9         |
| 5194.589700                    | 5194.593567                    | -3.867                                                | $0.1478 \times 10^{-4}$             | $0.1436 \times 10^{-4}$             | 2.916          | 5     | $F_1$ | 2          | 6    | $F_2$ | 8         |
| 5194.602200                    | 5194.608148                    | -5.948                                                | $0.3131 \times 10^{-5}$             | $0.3423 \times 10^{-5}$             | -8.542         | 5     | $F_1$ | 1          | 6    | $F_2$ | 8         |
| 5194.726000                    | 5194.736047                    | -10.047                                               | $0.1396 \times 10^{-4}$             | $0.6587 \times 10^{-5}$             | 111.928        | 2     | $E$   | 1          | 1    | $E$   | 2         |
| 5194.766300                    | 5194.758590                    | 7.710                                                 | $0.4609 \times 10^{-4}$             | $0.4658 \times 10^{-4}$             | -1.054         | 3     | $F_1$ | 1          | 4    | $F_2$ | 6         |
| 5195.393700                    | 5195.396399                    | -2.699                                                | $0.2456 \times 10^{-4}$             | $0.1562 \times 10^{-4}$             | 57.267         | 1     | $F_1$ | 1          | 1    | $F_2$ | 3         |
| 5195.866900                    | 5195.866479                    | 0.421                                                 | $0.2862 \times 10^{-4}$             | $0.2177 \times 10^{-4}$             | 31.481         | 4     | $F_2$ | 1          | 4    | $F_1$ | 10        |
| 5196.206900                    | 5196.206175                    | 0.725                                                 | $0.3953 \times 10^{-4}$             | $0.4120 \times 10^{-4}$             | -4.057         | 3     | $F_2$ | 1          | 4    | $F_1$ | 6         |
| 5197.420100                    | 5197.424350                    | -4.250                                                | $0.1077 \times 10^{-4}$             | $0.4620 \times 10^{-5}$             | 133.103        | 3     | $F_2$ | 1          | 2    | $F_1$ | 6         |
| 5198.866900                    | 5198.867260                    | -0.360                                                | $0.5774 \times 10^{-4}$             | $0.4274 \times 10^{-4}$             | 35.098         | 0     | $A_1$ | 1          | 1    | $A_2$ | 2         |
| 5199.179400                    | 5199.192699                    | -13.299                                               | $0.3149 \times 10^{-4}$             | $0.9099 \times 10^{-5}$             | 246.094        | 3     | $F_1$ | 1          | 2    | $F_2$ | 8         |
| 5199.203700                    | 5199.212190                    | -8.490                                                | $0.1857 \times 10^{-4}$             | $0.2086 \times 10^{-4}$             | -10.968        | 5     | $F_1$ | 1          | 5    | $F_2$ | 12        |
| 5199.614500                    | 5199.608733                    | 5.767                                                 | $0.7219 \times 10^{-4}$             | $0.7646 \times 10^{-4}$             | -5.581         | 3     | $F_1$ | 1          | 4    | $F_2$ | 7         |
| 5199.703300                    | 5199.728576                    | -25.276                                               | $0.6882 \times 10^{-4}$             | $0.1656 \times 10^{-4}$             | 315.468        | 4     | $A_1$ | 1          | 3    | $A_2$ | 4         |

Table II (continued).

| $\tilde{\nu}_e/\text{cm}^{-1}$ | $\tilde{\nu}_c/\text{cm}^{-1}$ | $\tilde{\nu}_e - \tilde{\nu}_c/10^{-3}\text{cm}^{-1}$ | $I_e/\text{cm}^{-2}\text{atm}^{-1}$ | $I_c/\text{cm}^{-2}\text{atm}^{-1}$ | $I_e - I_c/\%$ | $J''$ | $C''$ | $\alpha''$ | $J'$ | $C'$  | $\alpha'$ |
|--------------------------------|--------------------------------|-------------------------------------------------------|-------------------------------------|-------------------------------------|----------------|-------|-------|------------|------|-------|-----------|
| 5199.819600                    | 5199.806631                    | 12.969                                                | $0.5123 \times 10^{-4}$             | $0.7545 \times 10^{-5}$             | 578.990        | 7     | $A_2$ | 1          | 6    | $A_1$ | 8         |
| 5200.099500                    | 5200.099948                    | -0.448                                                | $0.3562 \times 10^{-4}$             | $0.3316 \times 10^{-4}$             | 7.409          | 5     | $E$   | 1          | 6    | $E$   | 6         |
| 5200.251500                    | 5200.259779                    | -8.279                                                | $0.1080 \times 10^{-4}$             | $0.5217 \times 10^{-5}$             | 107.014        | 1     | $F_1$ | 1          | 0    | $F_2$ | 2         |
| 5200.279200                    | 5200.274121                    | 5.079                                                 | $0.4829 \times 10^{-5}$             | $0.2646 \times 10^{-5}$             | 82.514         | 4     | $F_1$ | 1          | 4    | $F_2$ | 11        |
| 5200.517200                    | 5200.529619                    | -12.419                                               | $0.3281 \times 10^{-4}$             | $0.8334 \times 10^{-5}$             | 293.696        | 4     | $F_1$ | 1          | 3    | $F_2$ | 10        |
| 5200.809300                    | 5200.817826                    | -8.526                                                | $0.6153 \times 10^{-5}$             | $0.1141 \times 10^{-5}$             | 439.122        | 5     | $F_2$ | 1          | 4    | $F_1$ | 13        |
| 5200.917500                    | 5200.937473                    | -19.973                                               | $0.3990 \times 10^{-4}$             | $0.6756 \times 10^{-5}$             | 490.596        | 5     | $F_1$ | 1          | 4    | $F_2$ | 14        |
| 5200.956300                    | 5200.960543                    | -4.243                                                | $0.1414 \times 10^{-4}$             | $0.3137 \times 10^{-5}$             | 350.707        | 6     | $F_2$ | 2          | 5    | $F_1$ | 18        |
| 5200.976900                    | 5200.982260                    | -5.360                                                | $0.2459 \times 10^{-4}$             | $0.2375 \times 10^{-5}$             | 935.267        | 6     | $F_2$ | 1          | 5    | $F_1$ | 18        |
| 5201.045500                    | 5201.047980                    | -2.480                                                | $0.1971 \times 10^{-4}$             | $0.1639 \times 10^{-4}$             | 20.250         | 5     | $E$   | 1          | 5    | $E$   | 9         |
| 5201.151600                    | 5201.154885                    | -3.285                                                | $0.8695 \times 10^{-5}$             | $0.3008 \times 10^{-5}$             | 189.107        | 4     | $F_2$ | 1          | 3    | $F_1$ | 12        |
| 5201.460300                    | 5201.444877                    | 15.423                                                | $0.2103 \times 10^{-4}$             | $0.8237 \times 10^{-5}$             | 155.317        | 6     | $A_1$ | 1          | 6    | $A_2$ | 6         |
| 5201.529100                    | 5201.528424                    | 0.676                                                 | $0.1369 \times 10^{-4}$             | $0.3517 \times 10^{-5}$             | 289.304        | 5     | $E$   | 1          | 4    | $E$   | 10        |
| 5201.558000                    | 5201.560663                    | -2.663                                                | $0.1596 \times 10^{-4}$             | $0.4532 \times 10^{-5}$             | 252.182        | 2     | $F_2$ | 1          | 1    | $F_1$ | 5         |
| 5202.165200                    | 5202.159924                    | 5.276                                                 |                                     | $0.1577 \times 10^{-5}$             |                | 2     | $F_2$ | 1          | 3    | $F_1$ | 6         |
| 5202.621800                    | 5202.609406                    | 12.394                                                | $0.1052 \times 10^{-4}$             | $0.5491 \times 10^{-5}$             | 91.570         | 6     | $F_1$ | 1          | 6    | $F_2$ | 17        |
| 5202.762000                    | 5202.656861                    | 105.139                                               | $0.1328 \times 10^{-4}$             | $0.1678 \times 10^{-5}$             | 691.342        | 10    | $F_1$ | 1          | 9    | $F_2$ | 36        |
| 5203.286800                    | 5203.291159                    | -4.359                                                | $0.3753 \times 10^{-5}$             | $0.3344 \times 10^{-5}$             | 12.220         | 6     | $E$   | 1          | 7    | $E$   | 6         |
| 5203.469200                    | 5203.474399                    | -5.199                                                | $0.1319 \times 10^{-4}$             | $0.1154 \times 10^{-4}$             | 14.255         | 6     | $F_1$ | 1          | 7    | $F_2$ | 9         |
| 5203.528900                    | 5203.517844                    | 11.056                                                | $0.1717 \times 10^{-4}$             | $0.3793 \times 10^{-5}$             | 352.660        | 4     | $E$   | 1          | 3    | $E$   | 7         |
| 5203.937100                    | 5203.929392                    | 7.708                                                 | $0.4841 \times 10^{-5}$             | $0.3913 \times 10^{-5}$             | 23.728         | 6     | $E$   | 1          | 6    | $E$   | 11        |
| 5203.980000                    | 5203.963389                    | 16.611                                                |                                     | $0.2122 \times 10^{-5}$             |                | 3     | $F_2$ | 1          | 2    | $F_1$ | 7         |
| 5204.294500                    | 5204.289940                    | 4.560                                                 | $0.7254 \times 10^{-4}$             | $0.7315 \times 10^{-4}$             | -0.839         | 6     | $A_1$ | 1          | 7    | $A_2$ | 4         |
| 5204.541600                    | 5204.536183                    | 5.417                                                 |                                     | $0.4889 \times 10^{-5}$             |                | 5     | $F_2$ | 1          | 4    | $F_1$ | 14        |
| 5205.484200                    | 5205.475022                    | 9.178                                                 | $0.6659 \times 10^{-4}$             | $0.7982 \times 10^{-5}$             | 734.254        | 6     | $A_2$ | 1          | 5    | $A_1$ | 5         |
| 5205.586183                    | 5205.579297                    | 6.886                                                 |                                     | $0.1528 \times 10^{-5}$             |                | 6     | $F_2$ | 2          | 5    | $F_1$ | 19        |
| 5205.609883                    | 5205.601013                    | 8.870                                                 |                                     | $0.2627 \times 10^{-5}$             |                | 6     | $F_2$ | 1          | 5    | $F_1$ | 19        |
| 5205.852100                    | 5205.838668                    | 13.432                                                |                                     | $0.3376 \times 10^{-6}$             |                | 4     | $F_1$ | 1          | 3    | $F_2$ | 11        |
| 5205.904300                    | 5205.913735                    | -9.435                                                | $0.1616 \times 10^{-4}$             | $0.1277 \times 10^{-4}$             | 26.511         | 6     | $F_2$ | 2          | 6    | $F_1$ | 15        |
| 5205.932683                    | 5205.921806                    | 10.877                                                |                                     | $0.1604 \times 10^{-5}$             |                | 5     | $F_1$ | 2          | 4    | $F_2$ | 15        |
| 5205.948432                    | 5205.936386                    | 12.046                                                |                                     | $0.6999 \times 10^{-6}$             |                | 5     | $F_1$ | 1          | 4    | $F_2$ | 15        |
| 5206.980100                    | 5206.975004                    | 5.096                                                 |                                     | $0.1428 \times 10^{-5}$             |                | 6     | $F_1$ | 1          | 5    | $F_2$ | 18        |
| 5207.650200                    | 5207.649105                    | 1.095                                                 | $0.2931 \times 10^{-4}$             | $0.2952 \times 10^{-4}$             | -0.711         | 6     | $F_1$ | 1          | 7    | $F_2$ | 11        |
| 5208.018400                    | 5208.016942                    | 1.458                                                 | $0.8533 \times 10^{-4}$             | $0.8637 \times 10^{-4}$             | -1.202         | 4     | $F_1$ | 1          | 5    | $F_2$ | 8         |
| 5208.074900                    | 5208.069497                    | 5.403                                                 | $0.1823 \times 10^{-4}$             | $0.8840 \times 10^{-5}$             | 106.221        | 2     | $E$   | 1          | 2    | $E$   | 5         |
| 5208.158900                    | 5208.156523                    | 2.377                                                 | $0.1384 \times 10^{-4}$             | $0.5995 \times 10^{-5}$             | 130.864        | 2     | $F_2$ | 1          | 2    | $F_1$ | 5         |
| 5208.500900                    | 5208.497496                    | 3.404                                                 | $0.9265 \times 10^{-5}$             | $0.7889 \times 10^{-5}$             | 17.445         | 6     | $F_2$ | 2          | 6    | $F_1$ | 16        |
| 5208.625800                    | 5208.624874                    | 0.926                                                 | $0.6336 \times 10^{-5}$             | $0.7148 \times 10^{-5}$             | -11.355        | 2     | $E$   | 1          | 3    | $E$   | 4         |
| 5208.688600                    | 5208.690825                    | -2.225                                                | $0.4971 \times 10^{-4}$             | $0.5294 \times 10^{-4}$             | -6.098         | 4     | $E$   | 1          | 5    | $E$   | 6         |
| 5208.738200                    | 5208.733684                    | 4.516                                                 | $0.1876 \times 10^{-3}$             | $0.1997 \times 10^{-3}$             | -6.069         | 4     | $A_1$ | 1          | 5    | $A_2$ | 3         |
| 5209.185500                    | 5209.180149                    | 5.351                                                 | $0.1222 \times 10^{-4}$             | $0.1255 \times 10^{-4}$             | -2.595         | 3     | $F_2$ | 1          | 4    | $F_1$ | 7         |
| 5209.286400                    | 5209.284872                    | 1.528                                                 | $0.2762 \times 10^{-4}$             | $0.2874 \times 10^{-4}$             | -3.908         | 2     | $F_2$ | 1          | 3    | $F_1$ | 7         |
| 5211.028100                    | 5211.040322                    | -12.222                                               | $0.4607 \times 10^{-4}$             | $0.4452 \times 10^{-4}$             | 3.477          | 7     | $A_2$ | 1          | 7    | $A_1$ | 6         |
| 5211.104800                    | 5211.095540                    | 9.260                                                 | $0.5959 \times 10^{-5}$             | $0.6108 \times 10^{-5}$             | -2.441         | 6     | $F_1$ | 1          | 6    | $F_2$ | 18        |
| 5212.139700                    | 5212.132546                    | 7.154                                                 | $0.2676 \times 10^{-4}$             | $0.2864 \times 10^{-4}$             | -6.557         | 7     | $F_1$ | 2          | 8    | $F_2$ | 12        |
| 5212.395100                    | 5212.385551                    | 9.549                                                 | $0.5490 \times 10^{-5}$             | $0.3896 \times 10^{-5}$             | 40.926         | 9     | $F_1$ | 3          | 9    | $F_2$ | 24        |
| 5212.444800                    | 5212.435271                    | 9.529                                                 | $0.5179 \times 10^{-5}$             | $0.4885 \times 10^{-5}$             | 6.027          | 9     | $F_1$ | 2          | 9    | $F_2$ | 24        |
| 5214.530700                    | 5214.529452                    | 1.248                                                 | $0.1167 \times 10^{-4}$             | $0.3637 \times 10^{-5}$             | 220.866        | 2     | $F_2$ | 1          | 1    | $F_1$ | 6         |
| 5214.628500                    | 5214.629415                    | -0.915                                                |                                     | $0.9563 \times 10^{-5}$             |                | 7     | $F_1$ | 1          | 7    | $F_2$ | 20        |
| 5214.695800                    | 5214.694635                    | 1.165                                                 |                                     | $0.8543 \times 10^{-5}$             |                | 7     | $F_2$ | 1          | 7    | $F_1$ | 20        |

Table II (continued).

| $\tilde{\nu}_e/\text{cm}^{-1}$ | $\tilde{\nu}_c/\text{cm}^{-1}$ | $\tilde{\nu}_e - \tilde{\nu}_c/10^{-3}\text{cm}^{-1}$ | $I_e/\text{cm}^{-2}\text{atm}^{-1}$ | $I_c/\text{cm}^{-2}\text{atm}^{-1}$ | $I_e - I_c/\%$ | $J''$ | $C''$ | $\alpha''$ | $J'$ | $C'$  | $\alpha'$ |
|--------------------------------|--------------------------------|-------------------------------------------------------|-------------------------------------|-------------------------------------|----------------|-------|-------|------------|------|-------|-----------|
| 5214.803600                    | 5214.791628                    | 11.972                                                | $0.3410 \times 10^{-4}$             | $0.1576 \times 10^{-4}$             | 116.432        | 3     | $F_1$ | 1          | 3    | $F_2$ | 9         |
| 5214.891372                    | 5214.885203                    | 6.169                                                 | $0.9786 \times 10^{-5}$             | $0.6373 \times 10^{-5}$             | 53.558         | 1     | $F_1$ | 1          | 2    | $F_2$ | 6         |
| 5215.684000                    | 5215.685906                    | -1.906                                                | $0.1381 \times 10^{-4}$             | $0.7062 \times 10^{-5}$             | 95.542         | 3     | $F_2$ | 1          | 3    | $F_1$ | 10        |
| 5215.827800                    | 5215.809230                    | 18.570                                                | $0.5155 \times 10^{-4}$             | $0.5071 \times 10^{-4}$             | 1.658          | 7     | $A_2$ | 1          | 8    | $A_1$ | 5         |
| 5216.264929                    | 5216.268010                    | -3.081                                                |                                     | $0.1310 \times 10^{-5}$             |                | 2     | $E$   | 1          | 1    | $E$   | 3         |
| 5216.275363                    | 5216.275533                    | -0.170                                                |                                     | $0.3204 \times 10^{-5}$             |                | 1     | $F_1$ | 1          | 1    | $F_2$ | 4         |
| 5216.461000                    | 5216.446783                    | 14.217                                                | $0.1306 \times 10^{-4}$             | $0.1368 \times 10^{-4}$             | -4.538         | 4     | $F_1$ | 1          | 5    | $F_2$ | 9         |
| 5216.941000                    | 5216.941204                    | -0.204                                                | $0.2838 \times 10^{-5}$             | $0.2475 \times 10^{-5}$             | 14.657         | 2     | $F_2$ | 1          | 3    | $F_1$ | 8         |
| 5217.011600                    | 5217.013057                    | -1.457                                                | $0.6583 \times 10^{-4}$             | $0.1476 \times 10^{-4}$             | 346.151        | 3     | $A_2$ | 1          | 2    | $A_1$ | 4         |
| 5219.620900                    | 5219.618927                    | 1.973                                                 | $0.7995 \times 10^{-4}$             | $0.8486 \times 10^{-4}$             | -5.791         | 5     | $F_1$ | 1          | 6    | $F_2$ | 11        |
| 5219.919700                    | 5219.926909                    | -7.209                                                | $0.7552 \times 10^{-4}$             | $0.7952 \times 10^{-4}$             | -5.030         | 5     | $F_2$ | 1          | 6    | $F_1$ | 10        |
| 5219.991600                    | 5219.983658                    | 7.942                                                 | $0.1392 \times 10^{-4}$             | $0.1334 \times 10^{-4}$             | 4.353          | 8     | $F_2$ | 2          | 9    | $F_1$ | 15        |
| 5220.168500                    | 5220.150313                    | 18.187                                                | $0.1158 \times 10^{-4}$             | $0.9200 \times 10^{-5}$             | 25.874         | 8     | $E$   | 2          | 9    | $E$   | 10        |
| 5220.207300                    | 5220.193605                    | 13.695                                                | $0.9093 \times 10^{-5}$             | $0.1047 \times 10^{-4}$             | -13.169        | 8     | $F_2$ | 1          | 8    | $F_1$ | 23        |
| 5221.382700                    | 5221.387204                    | -4.504                                                | $0.2036 \times 10^{-4}$             | $0.3555 \times 10^{-5}$             | 472.641        | 3     | $F_2$ | 1          | 2    | $F_1$ | 8         |
| 5221.814100                    | 5221.784376                    | 29.724                                                | $0.7652 \times 10^{-4}$             | $0.3392 \times 10^{-4}$             | 125.612        | 4     | $A_1$ | 1          | 4    | $A_2$ | 4         |
| 5222.502700                    | 5222.481657                    | 21.043                                                | $0.1369 \times 10^{-4}$             | $0.1360 \times 10^{-4}$             | 0.654          | 8     | $F_2$ | 1          | 9    | $F_1$ | 16        |
| 5222.682200                    | 5222.676869                    | 5.331                                                 |                                     | $0.1388 \times 10^{-4}$             |                | 4     | $F_1$ | 1          | 4    | $F_2$ | 12        |
| 5223.013100                    | 5223.015714                    | -2.614                                                | $0.1797 \times 10^{-4}$             | $0.7788 \times 10^{-5}$             | 130.728        | 4     | $E$   | 1          | 4    | $E$   | 9         |
| 5223.288700                    | 5223.297366                    | -8.666                                                | $0.4477 \times 10^{-4}$             | $0.5545 \times 10^{-5}$             | 707.348        | 4     | $F_2$ | 1          | 3    | $F_1$ | 13        |
| 5224.098400                    | 5224.089093                    | 9.307                                                 | $0.4912 \times 10^{-5}$             | $0.4883 \times 10^{-5}$             | 0.591          | 8     | $A_1$ | 1          | 9    | $A_2$ | 5         |
| 5225.107486                    | 5225.105807                    | 1.679                                                 |                                     | $0.1058 \times 10^{-4}$             |                | 3     | $F_1$ | 1          | 4    | $F_2$ | 9         |
| 5225.403300                    | 5225.399644                    | 3.656                                                 | $0.1433 \times 10^{-4}$             | $0.1111 \times 10^{-4}$             | 28.988         | 2     | $F_2$ | 1          | 3    | $F_1$ | 9         |
| 5225.579100                    | 5225.587729                    | -8.629                                                | $0.1162 \times 10^{-4}$             | $0.1432 \times 10^{-5}$             | 711.616        | 3     | $F_1$ | 1          | 2    | $F_2$ | 9         |
| 5225.645500                    | 5225.645271                    | 0.229                                                 | $0.2691 \times 10^{-4}$             | $0.2356 \times 10^{-4}$             | 14.197         | 3     | $F_2$ | 1          | 4    | $F_1$ | 9         |
| 5226.454200                    | 5226.454467                    | -0.267                                                |                                     | $0.2528 \times 10^{-7}$             |                | 4     | $F_2$ | 1          | 4    | $F_1$ | 12        |
| 5227.182300                    | 5227.194405                    | -12.105                                               | $0.4545 \times 10^{-4}$             | $0.3822 \times 10^{-5}$             | 1089.171       | 5     | $F_1$ | 2          | 4    | $F_2$ | 16        |
| 5227.491300                    | 5227.487660                    | 3.640                                                 | $0.1292 \times 10^{-4}$             | $0.9548 \times 10^{-5}$             | 35.310         | 2     | $E$   | 1          | 3    | $E$   | 5         |
| 5227.696000                    | 5227.697284                    | -1.284                                                | $0.1050 \times 10^{-3}$             | $0.1054 \times 10^{-3}$             | -0.425         | 3     | $A_2$ | 1          | 4    | $A_1$ | 5         |
| 5227.827000                    | 5227.803985                    | 23.015                                                | $0.5495 \times 10^{-4}$             | $0.1122 \times 10^{-5}$             | 4797.882       | 9     | $A_2$ | 1          | 8    | $A_1$ | 13        |
| 5227.984200                    | 5227.995728                    | -11.528                                               | $0.8428 \times 10^{-4}$             | $0.5467 \times 10^{-5}$             | 1441.484       | 6     | $A_1$ | 1          | 5    | $A_2$ | 7         |
| 5228.493000                    | 5228.507249                    | -14.249                                               | $0.1385 \times 10^{-4}$             | $0.1318 \times 10^{-5}$             | 950.855        | 4     | $E$   | 1          | 3    | $E$   | 8         |
| 5228.855300                    | 5228.858796                    | -3.496                                                | $0.9054 \times 10^{-5}$             | $0.2539 \times 10^{-5}$             | 256.545        | 2     | $F_2$ | 1          | 2    | $F_1$ | 6         |
| 5228.899800                    | 5228.885904                    | 13.896                                                | $0.1702 \times 10^{-4}$             | $0.1452 \times 10^{-4}$             | 17.187         | 9     | $A_2$ | 1          | 10   | $A_1$ | 7         |
| 5229.471000                    | 5229.483714                    | -12.714                                               | $0.2608 \times 10^{-4}$             | $0.1826 \times 10^{-5}$             | 1328.389       | 5     | $E$   | 1          | 4    | $E$   | 11        |
| 5229.693900                    | 5229.663329                    | 30.571                                                | $0.4254 \times 10^{-4}$             | $0.1713 \times 10^{-4}$             | 148.271        | 5     | $F_1$ | 1          | 5    | $F_2$ | 15        |
| 5230.377100                    | 5230.376730                    | 0.370                                                 |                                     | $0.1393 \times 10^{-4}$             |                | 5     | $F_2$ | 1          | 5    | $F_1$ | 16        |
| 5231.046200                    | 5231.051896                    | -5.696                                                | $0.6515 \times 10^{-4}$             | $0.6713 \times 10^{-4}$             | -2.947         | 6     | $F_2$ | 1          | 7    | $F_1$ | 13        |
| 5231.568200                    | 5231.585522                    | -17.322                                               | $0.1099 \times 10^{-3}$             | $0.1163 \times 10^{-3}$             | -5.510         | 6     | $A_2$ | 1          | 7    | $A_1$ | 4         |
| 5231.644500                    | 5231.658598                    | -14.098                                               | $0.1223 \times 10^{-4}$             | $0.1145 \times 10^{-5}$             | 968.387        | 4     | $F_1$ | 1          | 3    | $F_2$ | 12        |
| 5232.607400                    | 5232.609845                    | -2.445                                                | $0.4494 \times 10^{-5}$             | $0.2157 \times 10^{-5}$             | 108.337        | 1     | $F_1$ | 1          | 2    | $F_2$ | 7         |
| 5233.987700                    | 5234.007333                    | -19.633                                               | $0.2980 \times 10^{-4}$             | $0.1241 \times 10^{-5}$             | 2300.709       | 6     | $F_2$ | 2          | 5    | $F_1$ | 20        |
| 5234.189500                    | 5234.189709                    | -0.209                                                | $0.5115 \times 10^{-5}$             | $0.2089 \times 10^{-5}$             | 144.839        | 2     | $E$   | 1          | 2    | $E$   | 6         |
| 5235.413900                    | 5235.397835                    | 16.065                                                | $0.1598 \times 10^{-5}$             | $0.3432 \times 10^{-6}$             | 365.574        | 2     | $F_2$ | 1          | 2    | $F_1$ | 7         |
| 5235.611700                    | 5235.636711                    | -25.011                                               | $0.1734 \times 10^{-4}$             | $0.7395 \times 10^{-6}$             | 2244.749       | 5     | $F_2$ | 1          | 4    | $F_1$ | 15        |
| 5237.510200                    | 5237.505547                    | 4.653                                                 | $0.3525 \times 10^{-4}$             | $0.1325 \times 10^{-4}$             | 166.072        | 6     | $F_2$ | 1          | 6    | $F_1$ | 18        |
| 5237.769300                    | 5237.769638                    | -0.338                                                | $0.2243 \times 10^{-4}$             | $0.1619 \times 10^{-4}$             | 38.552         | 3     | $F_2$ | 1          | 4    | $F_1$ | 10        |
| 5237.846500                    | 5237.848992                    | -2.492                                                | $0.6451 \times 10^{-4}$             | $0.2248 \times 10^{-4}$             | 186.957        | 6     | $A_2$ | 1          | 6    | $A_1$ | 7         |
| 5237.884400                    | 5237.889418                    | -5.018                                                | $0.1652 \times 10^{-4}$             | $0.7752 \times 10^{-6}$             | 2031.085       | 4     | $A_1$ | 1          | 3    | $A_2$ | 5         |
| 5239.842500                    | 5239.834229                    | 8.271                                                 | $0.7315 \times 10^{-5}$             | $0.1085 \times 10^{-4}$             | -32.602        | 4     | $E$   | 1          | 5    | $E$   | 8         |



Table II (continued).

| $\tilde{\nu}_e/\text{cm}^{-1}$ | $\tilde{\nu}_c/\text{cm}^{-1}$ | $\tilde{\nu}_e - \tilde{\nu}_c/10^{-3}\text{cm}^{-1}$ | $I_e/\text{cm}^{-2}\text{atm}^{-1}$ | $I_c/\text{cm}^{-2}\text{atm}^{-1}$ | $I_e - I_c/\%$ | $J''$ | $C''$ | $\alpha''$ | $J'$ | $C'$  | $\alpha'$ |
|--------------------------------|--------------------------------|-------------------------------------------------------|-------------------------------------|-------------------------------------|----------------|-------|-------|------------|------|-------|-----------|
| 5240.280000                    | 5240.320032                    | -40.032                                               | $0.3065 \times 10^{-4}$             | $0.3672 \times 10^{-6}$             | 8247.993       | 6     | $A_2$ | 1          | 5    | $A_1$ | 6         |
| 5240.706400                    | 5240.701290                    | 5.110                                                 | $0.4770 \times 10^{-5}$             | $0.8210 \times 10^{-5}$             | -41.903        | 4     | $F_1$ | 1          | 5    | $F_2$ | 11        |
| 5240.959100                    | 5240.965117                    | -6.017                                                | $0.1966 \times 10^{-4}$             | $0.1508 \times 10^{-5}$             | 1203.914       | 3     | $A_2$ | 1          | 3    | $A_1$ | 3         |
| 5241.187500                    | 5241.185961                    | 1.539                                                 | $0.1315 \times 10^{-5}$             | $0.4565 \times 10^{-5}$             | -71.196        | 4     | $A_1$ | 1          | 5    | $A_2$ | 4         |
| 5241.453400                    | 5241.453009                    | 0.391                                                 | $0.4448 \times 10^{-4}$             | $0.4666 \times 10^{-4}$             | -4.680         | 7     | $F_1$ | 1          | 8    | $F_2$ | 15        |
| 5242.023700                    | 5242.022433                    | 1.267                                                 | $0.4110 \times 10^{-4}$             | $0.4262 \times 10^{-4}$             | -3.561         | 7     | $F_2$ | 1          | 8    | $F_1$ | 14        |
| 5242.178900                    | 5242.173035                    | 5.865                                                 | $0.2346 \times 10^{-4}$             | $0.1749 \times 10^{-4}$             | 34.135         | 3     | $F_1$ | 1          | 4    | $F_2$ | 11        |
| 5242.415400                    | 5242.428534                    | -13.134                                               | $0.4736 \times 10^{-5}$             | $0.1289 \times 10^{-5}$             | 267.433        | 3     | $F_1$ | 1          | 3    | $F_2$ | 10        |
| 5243.055639                    | 5243.058044                    | -2.405                                                |                                     | $0.2606 \times 10^{-5}$             |                | 3     | $F_2$ | 1          | 3    | $F_1$ | 12        |
| 5243.069600                    | 5243.078032                    | -8.432                                                | $0.1682 \times 10^{-4}$             | $0.3208 \times 10^{-6}$             | 5142.362       | 5     | $F_1$ | 1          | 4    | $F_2$ | 17        |
| 5243.656700                    | 5243.655858                    | 0.842                                                 | $0.4594 \times 10^{-4}$             | $0.4961 \times 10^{-4}$             | -7.403         | 4     | $F_2$ | 1          | 5    | $F_1$ | 13        |
| 5244.813400                    | 5244.809286                    | 4.114                                                 | $0.3286 \times 10^{-4}$             | $0.1242 \times 10^{-4}$             | 164.580        | 7     | $F_2$ | 1          | 7    | $F_1$ | 24        |
| 5245.114700                    | 5245.118896                    | -4.196                                                | $0.3645 \times 10^{-4}$             | $0.5589 \times 10^{-6}$             | 6421.685       | 7     | $A_2$ | 1          | 6    | $A_1$ | 9         |
| 5247.751200                    | 5247.737582                    | 13.618                                                |                                     | $0.2448 \times 10^{-5}$             |                | 3     | $F_1$ | 1          | 3    | $F_2$ | 11        |
| 5249.613900                    | 5249.613891                    | 0.009                                                 | $0.4428 \times 10^{-5}$             | $0.9563 \times 10^{-6}$             | 363.039        | 2     | $E$   | 1          | 3    | $E$   | 6         |
| 5251.254700                    | 5251.253682                    | 1.018                                                 |                                     | $0.4332 \times 10^{-4}$             |                | 8     | $A_1$ | 1          | 9    | $A_2$ | 6         |
| 5251.553253                    | 5251.561811                    | -8.558                                                |                                     | $0.3246 \times 10^{-5}$             |                | 4     | $F_1$ | 1          | 5    | $F_2$ | 12        |
| 5251.732200                    | 5251.739748                    | -7.548                                                |                                     | $0.2277 \times 10^{-5}$             |                | 2     | $F_2$ | 1          | 3    | $F_1$ | 11        |
| 5252.569000                    | 5252.581338                    | -12.338                                               | $0.2398 \times 10^{-4}$             | $0.2590 \times 10^{-4}$             | -7.406         | 8     | $E$   | 1          | 9    | $E$   | 12        |
| 5253.157000                    | 5253.165729                    | -8.729                                                | $0.1163 \times 10^{-4}$             | $0.5781 \times 10^{-6}$             | 1911.746       | 4     | $F_2$ | 1          | 4    | $F_1$ | 13        |
| 5253.268100                    | 5253.287094                    | -18.994                                               | $0.5566 \times 10^{-5}$             | $0.1456 \times 10^{-5}$             | 282.293        | 4     | $F_1$ | 1          | 4    | $F_2$ | 14        |
| 5253.406800                    | 5253.409128                    | -2.328                                                | $0.1769 \times 10^{-4}$             | $0.1396 \times 10^{-4}$             | 26.748         | 4     | $E$   | 1          | 5    | $E$   | 9         |
| 5253.890100                    | 5253.889573                    | 0.527                                                 | $0.9333 \times 10^{-5}$             | $0.2021 \times 10^{-5}$             | 361.883        | 4     | $E$   | 1          | 4    | $E$   | 10        |
| 5254.443200                    | 5254.431138                    | 12.062                                                | $0.4580 \times 10^{-5}$             | $0.4116 \times 10^{-5}$             | 11.271         | 4     | $F_2$ | 1          | 5    | $F_1$ | 15        |
| 5256.718500                    | 5256.714952                    | 3.548                                                 | $0.2375 \times 10^{-4}$             | $0.1720 \times 10^{-4}$             | 38.110         | 4     | $F_1$ | 1          | 5    | $F_2$ | 14        |
| 5258.299100                    | 5258.286007                    | 13.093                                                | $0.9786 \times 10^{-5}$             | $0.2153 \times 10^{-5}$             | 354.572        | 4     | $F_1$ | 1          | 4    | $F_2$ | 15        |
| 5258.324440                    | 5258.319535                    | 4.905                                                 |                                     | $0.3494 \times 10^{-4}$             |                | 5     | $F_1$ | 2          | 6    | $F_2$ | 16        |
| 5258.986300                    | 5258.978022                    | 8.278                                                 | $0.1639 \times 10^{-4}$             | $0.1691 \times 10^{-4}$             | -3.091         | 5     | $E$   | 1          | 6    | $E$   | 10        |
| 5259.201200                    | 5259.191917                    | 9.283                                                 | $0.4230 \times 10^{-4}$             | $0.3148 \times 10^{-4}$             | 34.391         | 4     | $A_1$ | 1          | 5    | $A_2$ | 5         |
| 5259.892500                    | 5259.880657                    | 11.843                                                | $0.2459 \times 10^{-4}$             | $0.6909 \times 10^{-5}$             | 255.895        | 4     | $A_1$ | 1          | 4    | $A_2$ | 5         |
| 5263.177200                    | 5263.180992                    | -3.792                                                | $0.1713 \times 10^{-4}$             | $0.2592 \times 10^{-6}$             | 6507.898       | 5     | $F_1$ | 2          | 5    | $F_2$ | 17        |
| 5263.339900                    | 5263.356470                    | -16.570                                               | $0.5840 \times 10^{-5}$             | $0.2964 \times 10^{-6}$             | 1870.494       | 5     | $E$   | 1          | 5    | $E$   | 11        |
| 5263.764300                    | 5263.769368                    | -5.068                                                |                                     | $0.2918 \times 10^{-5}$             |                | 5     | $F_2$ | 1          | 5    | $F_1$ | 18        |
| 5265.175500                    | 5265.115513                    | 59.987                                                | $0.1311 \times 10^{-4}$             | $0.5061 \times 10^{-5}$             | 159.064        | 10    | $E$   | 1          | 10   | $E$   | 24        |
| 5265.242500                    | 5265.185578                    | 56.922                                                | $0.1883 \times 10^{-4}$             | $0.7568 \times 10^{-5}$             | 148.798        | 10    | $F_2$ | 1          | 10   | $F_1$ | 34        |
| 5265.383400                    | 5265.335263                    | 48.137                                                | $0.3041 \times 10^{-4}$             | $0.1231 \times 10^{-4}$             | 147.065        | 10    | $A_2$ | 1          | 10   | $A_1$ | 13        |
| 5265.423900                    | 5265.411735                    | 12.165                                                | $0.9157 \times 10^{-5}$             | $0.8733 \times 10^{-5}$             | 4.852          | 5     | $F_1$ | 2          | 6    | $F_2$ | 17        |
| 5266.586300                    | 5266.579108                    | 7.192                                                 | $0.3290 \times 10^{-5}$             | $0.5806 \times 10^{-6}$             | 466.667        | 3     | $F_1$ | 1          | 4    | $F_2$ | 13        |
| 5266.713400                    | 5266.705648                    | 7.752                                                 | $0.9350 \times 10^{-5}$             | $0.9687 \times 10^{-5}$             | -3.475         | 5     | $E$   | 1          | 6    | $E$   | 11        |
| 5268.357100                    | 5268.357626                    | -0.526                                                |                                     | $0.1886 \times 10^{-5}$             |                | 3     | $F_2$ | 1          | 4    | $F_1$ | 12        |
| 5268.712700                    | 5268.722560                    | -9.860                                                | $0.1706 \times 10^{-4}$             | $0.1357 \times 10^{-4}$             | 25.709         | 5     | $F_2$ | 1          | 6    | $F_1$ | 15        |
| 5269.798200                    | 5269.791914                    | 6.286                                                 |                                     | $0.3606 \times 10^{-5}$             |                | 5     | $F_1$ | 1          | 5    | $F_2$ | 18        |
| 5270.892000                    | 5270.902350                    | -10.350                                               | $0.1357 \times 10^{-4}$             | $0.8105 \times 10^{-5}$             | 67.428         | 3     | $A_2$ | 1          | 4    | $A_1$ | 6         |
| 5271.093300                    | 5271.115592                    | -22.292                                               | $0.2615 \times 10^{-4}$             | $0.2762 \times 10^{-4}$             | -5.325         | 10    | $A_2$ | 1          | 11   | $A_1$ | 6         |
| 5271.310100                    | 5271.306321                    | 3.779                                                 | $0.7880 \times 10^{-5}$             | $0.5742 \times 10^{-5}$             | 37.234         | 5     | $F_2$ | 1          | 6    | $F_1$ | 16        |
| 5271.354700                    | 5271.371596                    | -16.896                                               | $0.1422 \times 10^{-4}$             | $0.1589 \times 10^{-4}$             | -10.490        | 10    | $F_2$ | 1          | 11   | $F_1$ | 24        |
| 5271.462800                    | 5271.478645                    | -15.845                                               | $0.9896 \times 10^{-5}$             | $0.1050 \times 10^{-4}$             | -5.788         | 10    | $E$   | 1          | 11   | $E$   | 16        |
| 5271.619400                    | 5271.600148                    | 19.252                                                | $0.1418 \times 10^{-4}$             | $0.1882 \times 10^{-4}$             | -24.660        | 6     | $F_1$ | 1          | 7    | $F_2$ | 17        |
| 5271.768100                    | 5271.757913                    | 10.187                                                | $0.6013 \times 10^{-4}$             | $0.7340 \times 10^{-4}$             | -18.081        | 6     | $A_1$ | 1          | 7    | $A_2$ | 7         |
| 5271.843600                    | 5271.839334                    | 4.266                                                 | $0.1724 \times 10^{-4}$             | $0.3843 \times 10^{-8}$             | 448517.400     | 6     | $A_1$ | 1          | 6    | $A_2$ | 7         |

Table II (continued).

| $\tilde{\nu}_e/\text{cm}^{-1}$ | $\tilde{\nu}_c/\text{cm}^{-1}$ | $\tilde{\nu}_e - \tilde{\nu}_c/10^{-3}\text{cm}^{-1}$ | $I_e/\text{cm}^{-2}\text{atm}^{-1}$ | $I_c/\text{cm}^{-2}\text{atm}^{-1}$ | $I_e - I_c/\%$ | $J''$ | $C''$ | $\alpha''$ | $J'$ | $C'$  | $\alpha'$ |
|--------------------------------|--------------------------------|-------------------------------------------------------|-------------------------------------|-------------------------------------|----------------|-------|-------|------------|------|-------|-----------|
| 5273.055200                    | 5273.040959                    | 14.241                                                |                                     | $0.6127 \times 10^{-5}$             |                | 6     | $A_2$ | 1          | 6    | $A_1$ | 8         |
| 5273.921700                    | 5273.912449                    | 9.251                                                 | $0.2129 \times 10^{-4}$             | $0.1704 \times 10^{-4}$             | 24.948         | 5     | $F_1$ | 1          | 6    | $F_2$ | 18        |
| 5284.262500                    | 5284.274650                    | -12.150                                               |                                     | $0.2496 \times 10^{-4}$             |                | 6     | $A_2$ | 1          | 7    | $A_1$ | 6         |
| 5301.860500                    | 5301.861127                    | -0.627                                                | $0.4081 \times 10^{-5}$             | $0.1920 \times 10^{-5}$             | 112.529        | 5     | $E$   | 1          | 6    | $E$   | 14        |
| 5302.218800                    | 5302.219524                    | -0.724                                                | $0.6862 \times 10^{-5}$             | $0.4195 \times 10^{-5}$             | 63.586         | 5     | $F_1$ | 2          | 6    | $F_2$ | 20        |
| 5303.763500                    | 5303.749201                    | 14.299                                                |                                     | $0.9632 \times 10^{-6}$             |                | 5     | $F_1$ | 2          | 4    | $F_2$ | 20        |
| 5303.866300                    | 5303.852915                    | 13.385                                                |                                     | $0.7834 \times 10^{-5}$             |                | 7     | $F_2$ | 1          | 8    | $F_1$ | 23        |
| 5305.641100                    | 5305.646240                    | -5.140                                                |                                     | $0.4235 \times 10^{-6}$             |                | 5     | $F_2$ | 1          | 4    | $F_1$ | 19        |
| 5306.444300                    | 5306.435761                    | 8.539                                                 |                                     | $0.1513 \times 10^{-4}$             |                | 8     | $F_1$ | 2          | 9    | $F_2$ | 24        |
| 5311.863800                    | 5311.878717                    | -14.917                                               |                                     | $0.3622 \times 10^{-6}$             |                | 4     | $F_1$ | 1          | 3    | $F_2$ | 14        |
| 5312.028000                    | 5312.036170                    | -8.170                                                |                                     | $0.9373 \times 10^{-6}$             |                | 4     | $A_1$ | 1          | 3    | $A_2$ | 6         |
| 5312.726400                    | 5312.639842                    | 86.558                                                |                                     | $0.3239 \times 10^{-5}$             |                | 9     | $F_1$ | 3          | 9    | $F_2$ | 38        |
| 5312.777200                    | 5312.689562                    | 87.638                                                | $0.1525 \times 10^{-4}$             | $0.6579 \times 10^{-5}$             | 131.799        | 9     | $F_1$ | 2          | 9    | $F_2$ | 38        |
| 5318.665600                    | 5318.682307                    | -16.707                                               |                                     | $0.4061 \times 10^{-7}$             |                | 5     | $F_1$ | 2          | 4    | $F_2$ | 22        |
| 5322.429700                    | 5322.388740                    | 40.960                                                | $0.1824 \times 10^{-4}$             | $0.8648 \times 10^{-5}$             | 110.906        | 8     | $F_1$ | 2          | 8    | $F_2$ | 34        |
| 5322.497600                    | 5322.459798                    | 37.802                                                |                                     | $0.4299 \times 10^{-5}$             |                | 8     | $F_1$ | 1          | 8    | $F_2$ | 34        |
| 5322.604300                    | 5322.596492                    | 7.808                                                 |                                     | $0.1229 \times 10^{-6}$             |                | 4     | $F_2$ | 1          | 3    | $F_1$ | 16        |
| 5326.856200                    | 5326.854926                    | 1.274                                                 |                                     | $0.5750 \times 10^{-7}$             |                | 4     | $E$   | 1          | 3    | $E$   | 10        |
| 5336.701400                    | 5336.705329                    | -3.929                                                |                                     | $0.1827 \times 10^{-4}$             |                | 6     | $A_1$ | 1          | 5    | $A_2$ | 12        |
| 5340.741969                    | 5340.731431                    | 10.538                                                |                                     | $0.1626 \times 10^{-5}$             |                | 6     | $F_2$ | 1          | 5    | $F_1$ | 34        |
| 5343.156411                    | 5343.168090                    | -11.679                                               |                                     | $0.3534 \times 10^{-5}$             |                | 4     | $A_1$ | 1          | 5    | $A_2$ | 7         |
| 5348.941500                    | 5348.944321                    | -2.821                                                |                                     | $0.4669 \times 10^{-6}$             |                | 6     | $F_2$ | 2          | 5    | $F_1$ | 37        |
| 5348.964381                    | 5348.966038                    | -1.657                                                |                                     | $0.1658 \times 10^{-5}$             |                | 6     | $F_2$ | 1          | 5    | $F_1$ | 37        |
| 5352.141963                    | 5352.153561                    | -11.598                                               |                                     | $0.5859 \times 10^{-5}$             |                | 5     | $F_2$ | 1          | 4    | $F_1$ | 26        |
| 5355.436400                    | 5355.458085                    | -21.685                                               |                                     | $0.3258 \times 10^{-5}$             |                | 5     | $F_2$ | 1          | 4    | $F_1$ | 27        |
| 5357.989800                    | 5357.994143                    | -4.343                                                | $0.1398 \times 10^{-5}$             | $0.1457 \times 10^{-5}$             | -4.042         | 4     | $F_2$ | 1          | 4    | $F_1$ | 19        |
| 5363.563232                    | 5363.577651                    | -14.419                                               |                                     | $0.2411 \times 10^{-5}$             |                | 4     | $F_2$ | 1          | 3    | $F_1$ | 22        |
| 5367.911000                    | 5367.873181                    | 37.819                                                |                                     | $0.1198 \times 10^{-3}$             |                | 7     | $A_2$ | 1          | 8    | $A_1$ | 11        |
| 5368.036400                    | 5367.996095                    | 40.305                                                |                                     | $0.1307 \times 10^{-4}$             |                | 7     | $F_2$ | 2          | 8    | $F_1$ | 26        |
| 5368.074000                    | 5368.034113                    | 39.887                                                | $0.6436 \times 10^{-4}$             | $0.5958 \times 10^{-4}$             | 8.020          | 7     | $F_2$ | 1          | 8    | $F_1$ | 26        |
| 5368.131200                    | 5368.089740                    | 41.460                                                | $0.7833 \times 10^{-4}$             | $0.7309 \times 10^{-4}$             | 7.167          | 7     | $F_1$ | 1          | 8    | $F_2$ | 27        |
| 5369.506900                    | 5369.504444                    | 2.456                                                 |                                     | $0.6380 \times 10^{-4}$             |                | 7     | $F_2$ | 2          | 8    | $F_1$ | 27        |
| 5369.544800                    | 5369.542463                    | 2.337                                                 |                                     | $0.1447 \times 10^{-4}$             |                | 7     | $F_2$ | 1          | 8    | $F_1$ | 27        |
| 5370.195500                    | 5370.190576                    | 4.924                                                 | $0.8606 \times 10^{-5}$             | $0.5759 \times 10^{-5}$             | 49.446         | 4     | $F_2$ | 1          | 3    | $F_1$ | 23        |
| 5371.028600                    | 5371.046508                    | -17.908                                               | $0.3699 \times 10^{-4}$             | $0.3262 \times 10^{-4}$             | 13.409         | 4     | $F_1$ | 1          | 4    | $F_2$ | 22        |
| 5371.106000                    | 5371.097869                    | 8.131                                                 |                                     | $0.1730 \times 10^{-5}$             |                | 3     | $F_2$ | 1          | 3    | $F_1$ | 17        |
| 5371.496200                    | 5371.416039                    | 80.161                                                |                                     | $0.7024 \times 10^{-5}$             |                | 6     | $F_2$ | 2          | 5    | $F_1$ | 39        |
| 5371.518300                    | 5371.437755                    | 80.545                                                |                                     | $0.3521 \times 10^{-5}$             |                | 6     | $F_2$ | 1          | 5    | $F_1$ | 39        |
| 5373.129700                    | 5373.164686                    | -34.986                                               | $0.2652 \times 10^{-4}$             | $0.9103 \times 10^{-5}$             | 191.330        | 4     | $F_1$ | 1          | 3    | $F_2$ | 21        |
| 5373.523000                    | 5373.483773                    | 39.227                                                | $0.7092 \times 10^{-4}$             | $0.6240 \times 10^{-4}$             | 13.647         | 6     | $E$   | 1          | 7    | $E$   | 17        |
| 5373.550500                    | 5373.513286                    | 37.214                                                |                                     | $0.7017 \times 10^{-5}$             |                | 6     | $F_2$ | 2          | 7    | $F_1$ | 27        |
| 5373.571300                    | 5373.535002                    | 36.298                                                | $0.9367 \times 10^{-4}$             | $0.8584 \times 10^{-4}$             | 9.124          | 6     | $F_2$ | 1          | 7    | $F_1$ | 27        |
| 5374.687900                    | 5374.666598                    | 21.302                                                | $0.1937 \times 10^{-3}$             | $0.1651 \times 10^{-3}$             | 17.314         | 6     | $A_2$ | 1          | 7    | $A_1$ | 9         |
| 5379.527700                    | 5379.518192                    | 9.508                                                 | $0.5426 \times 10^{-4}$             | $0.2781 \times 10^{-4}$             | 95.120         | 4     | $F_2$ | 1          | 4    | $F_1$ | 22        |
| 5379.636400                    | 5379.640206                    | -3.806                                                |                                     | $0.7689 \times 10^{-4}$             |                | 3     | $A_2$ | 1          | 3    | $A_1$ | 5         |
| 5383.005100                    | 5383.026027                    | -20.927                                               | $0.1569 \times 10^{-4}$             | $0.1165 \times 10^{-4}$             | 34.686         | 3     | $F_2$ | 1          | 2    | $F_1$ | 14        |
| 5385.499700                    | 5385.540856                    | -41.156                                               |                                     | $0.5459 \times 10^{-5}$             |                | 4     | $F_2$ | 1          | 3    | $F_1$ | 24        |
| 5388.012300                    | 5387.992240                    | 20.060                                                |                                     | $0.5892 \times 10^{-5}$             |                | 4     | $F_1$ | 1          | 3    | $F_2$ | 23        |
| 5387.985945                    | 5387.998559                    | -12.614                                               |                                     | $0.7461 \times 10^{-4}$             |                | 4     | $F_2$ | 1          | 5    | $F_1$ | 23        |
| 5389.869434                    | 5389.861879                    | 7.555                                                 |                                     | $0.1834 \times 10^{-4}$             |                | 3     | $F_1$ | 1          | 2    | $F_2$ | 17        |

Table II (continued).

| $\tilde{\nu}_e/\text{cm}^{-1}$ | $\tilde{\nu}_c/\text{cm}^{-1}$ | $\tilde{\nu}_e - \tilde{\nu}_c/10^{-3}\text{cm}^{-1}$ | $I_e/\text{cm}^{-2}\text{atm}^{-1}$ | $I_c/\text{cm}^{-2}\text{atm}^{-1}$ | $I_e - I_c/\%$ | $J''$ | $C''$ | $\alpha''$ | $J'$ | $C'$  | $\alpha'$ |
|--------------------------------|--------------------------------|-------------------------------------------------------|-------------------------------------|-------------------------------------|----------------|-------|-------|------------|------|-------|-----------|
| 5395.680260                    | 5395.764910                    | -84.650                                               |                                     | $0.9122 \times 10^{-5}$             |                | 3     | $F_1$ | 1          | 2    | $F_2$ | 18        |
| 5395.941900                    | 5395.934097                    | 7.803                                                 |                                     | $0.6549 \times 10^{-5}$             |                | 2     | $F_2$ | 1          | 3    | $F_1$ | 16        |
| 5398.026500                    | 5398.012317                    | 14.183                                                | $0.1079 \times 10^{-3}$             | $0.1088 \times 10^{-3}$             | -0.790         | 3     | $F_1$ | 1          | 4    | $F_2$ | 20        |
| 5398.273900                    | 5398.295813                    | -21.913                                               |                                     | $0.1947 \times 10^{-4}$             |                | 7     | $F_2$ | 2          | 6    | $F_1$ | 49        |
| 5398.312500                    | 5398.333832                    | -21.332                                               |                                     | $0.2158 \times 10^{-4}$             |                | 7     | $F_2$ | 1          | 6    | $F_1$ | 49        |
| 5399.171600                    | 5399.165817                    | 5.783                                                 | $0.3645 \times 10^{-3}$             | $0.3767 \times 10^{-3}$             | -3.245         | 3     | $A_2$ | 1          | 4    | $A_1$ | 8         |
| 5399.568000                    | 5399.559582                    | 8.418                                                 |                                     | $0.9296 \times 10^{-4}$             |                | 4     | $A_1$ | 1          | 5    | $A_2$ | 9         |
| 5399.893000                    | 5399.897302                    | -4.302                                                | $0.1209 \times 10^{-3}$             | $0.1346 \times 10^{-3}$             | -10.169        | 3     | $F_2$ | 1          | 4    | $F_1$ | 19        |
| 5400.190100                    | 5400.188818                    | 1.282                                                 | $0.8535 \times 10^{-4}$             | $0.7510 \times 10^{-4}$             | 13.645         | 2     | $E$   | 1          | 3    | $E$   | 10        |
| 5401.746000                    | 5401.792098                    | -46.098                                               | $0.4164 \times 10^{-4}$             | $0.3552 \times 10^{-4}$             | 17.242         | 2     | $E$   | 1          | 2    | $E$   | 10        |
| 5402.539700                    | 5402.532315                    | 7.385                                                 |                                     | $0.1360 \times 10^{-3}$             |                | 2     | $F_2$ | 1          | 3    | $F_1$ | 17        |
| 5403.245900                    | 5403.216518                    | 29.382                                                | $0.5781 \times 10^{-4}$             | $0.6811 \times 10^{-4}$             | -15.126        | 1     | $F_1$ | 1          | 2    | $F_2$ | 13        |
| 5403.527200                    | 5403.518539                    | 8.661                                                 | $0.1006 \times 10^{-4}$             | $0.5904 \times 10^{-5}$             | 70.389         | 5     | $F_2$ | 1          | 5    | $F_1$ | 34        |
| 5403.585900                    | 5403.614370                    | -28.470                                               |                                     | $0.9031 \times 10^{-5}$             |                | 5     | $E$   | 1          | 5    | $E$   | 21        |
| 5404.489700                    | 5404.501464                    | -11.764                                               |                                     | $0.9089 \times 10^{-5}$             |                | 4     | $F_2$ | 1          | 4    | $F_1$ | 26        |
| 5405.465800                    | 5405.480810                    | -15.010                                               | $0.4761 \times 10^{-4}$             | $0.2832 \times 10^{-4}$             | 68.121         | 3     | $F_2$ | 1          | 3    | $F_1$ | 22        |
| 5406.407000                    | 5406.441409                    | -34.409                                               | $0.1116 \times 10^{-3}$             | $0.5560 \times 10^{-4}$             | 100.728        | 3     | $A_2$ | 1          | 3    | $A_1$ | 6         |
| 5407.785300                    | 5407.805988                    | -20.688                                               | $0.2681 \times 10^{-4}$             | $0.5627 \times 10^{-5}$             | 376.467        | 4     | $F_2$ | 1          | 4    | $F_1$ | 27        |
| 5410.633000                    | 5410.599304                    | 33.696                                                |                                     | $0.2735 \times 10^{-5}$             |                | 5     | $F_1$ | 2          | 4    | $F_2$ | 35        |
| 5410.647900                    | 5410.613884                    | 34.016                                                |                                     | $0.4907 \times 10^{-5}$             |                | 5     | $F_1$ | 1          | 4    | $F_2$ | 35        |
| 5411.687600                    | 5411.695564                    | -7.964                                                | $0.7131 \times 10^{-4}$             | $0.5914 \times 10^{-4}$             | 20.582         | 1     | $F_1$ | 1          | 1    | $F_2$ | 8         |
| 5412.100800                    | 5412.093735                    | 7.065                                                 |                                     | $0.1030 \times 10^{-4}$             |                | 3     | $F_2$ | 1          | 3    | $F_1$ | 23        |
| 5414.439500                    | 5414.460473                    | -20.973                                               | $0.7718 \times 10^{-4}$             | $0.4131 \times 10^{-4}$             | 86.850         | 2     | $F_2$ | 1          | 2    | $F_1$ | 14        |
| 5415.030400                    | 5415.063600                    | -33.200                                               | $0.6353 \times 10^{-4}$             | $0.3156 \times 10^{-4}$             | 101.313        | 3     | $F_1$ | 1          | 3    | $F_2$ | 21        |
| 5416.131600                    | 5416.135085                    | -3.485                                                | $0.2512 \times 10^{-4}$             | $0.1691 \times 10^{-4}$             | 48.553         | 4     | $F_2$ | 1          | 3    | $F_1$ | 28        |
| 5417.423800                    | 5417.464792                    | -40.992                                               | $0.1289 \times 10^{-3}$             | $0.9808 \times 10^{-4}$             | 31.420         | 1     | $F_1$ | 1          | 2    | $F_2$ | 15        |
| 5419.131000                    | 5419.121400                    | 9.600                                                 | $0.2901 \times 10^{-3}$             | $0.2485 \times 10^{-3}$             | 16.745         | 0     | $A_1$ | 1          | 1    | $A_2$ | 4         |
| 5419.385400                    | 5419.384420                    | 0.980                                                 | $0.5693 \times 10^{-4}$             | $0.4643 \times 10^{-4}$             | 22.608         | 1     | $F_1$ | 1          | 0    | $F_2$ | 4         |
| 5421.082800                    | 5421.032254                    | 50.546                                                | $0.1378 \times 10^{-3}$             | $0.1261 \times 10^{-3}$             | 9.262          | 4     | $A_1$ | 1          | 4    | $A_2$ | 9         |
| 5421.430200                    | 5421.421351                    | 8.849                                                 | $0.1207 \times 10^{-4}$             | $0.1310 \times 10^{-5}$             | 821.122        | 3     | $F_2$ | 1          | 4    | $F_1$ | 22        |
| 5421.780300                    | 5421.765894                    | 14.406                                                | $0.9925 \times 10^{-4}$             | $0.1308 \times 10^{-3}$             | -24.118        | 4     | $A_1$ | 1          | 3    | $A_2$ | 10        |
| 5423.127800                    | 5423.150682                    | -22.882                                               | $0.6216 \times 10^{-4}$             | $0.5893 \times 10^{-4}$             | 5.477          | 3     | $F_1$ | 1          | 2    | $F_2$ | 20        |
| 5425.557800                    | 5425.518108                    | 39.692                                                | $0.9372 \times 10^{-4}$             | $0.7429 \times 10^{-4}$             | 26.148         | 1     | $F_1$ | 1          | 1    | $F_2$ | 9         |
| 5427.087000                    | 5427.011748                    | 75.252                                                | $0.2703 \times 10^{-3}$             | $0.2032 \times 10^{-3}$             | 33.001         | 3     | $A_2$ | 1          | 2    | $A_1$ | 8         |
| 5429.750400                    | 5429.696812                    | 53.588                                                | $0.7300 \times 10^{-4}$             | $0.5433 \times 10^{-4}$             | 34.362         | 2     | $E$   | 1          | 1    | $E$   | 8         |
| 5429.722700                    | 5429.735941                    | -13.241                                               | $0.9414 \times 10^{-4}$             | $0.7248 \times 10^{-4}$             | 29.884         | 3     | $F_2$ | 1          | 2    | $F_1$ | 19        |
| 5429.911600                    | 5429.891155                    | 20.445                                                |                                     | $0.8351 \times 10^{-4}$             |                | 3     | $F_1$ | 1          | 3    | $F_2$ | 23        |
| 5432.785800                    | 5432.777621                    | 8.179                                                 | $0.5756 \times 10^{-4}$             | $0.5742 \times 10^{-4}$             | 0.243          | 1     | $F_1$ | 1          | 2    | $F_2$ | 16        |
| 5434.304400                    | 5434.224863                    | 79.537                                                | $0.7092 \times 10^{-4}$             | $0.9094 \times 10^{-4}$             | -22.014        | 5     | $F_2$ | 1          | 5    | $F_1$ | 39        |
| 5436.455800                    | 5436.454837                    | 0.963                                                 |                                     | $0.8695 \times 10^{-5}$             |                | 4     | $F_1$ | 1          | 4    | $F_2$ | 33        |
| 5436.900300                    | 5436.915256                    | -14.956                                               | $0.7437 \times 10^{-4}$             | $0.6306 \times 10^{-4}$             | 17.941         | 2     | $F_2$ | 1          | 3    | $F_1$ | 22        |
| 5441.240300                    | 5441.241993                    | -1.693                                                | $0.5974 \times 10^{-4}$             | $0.5906 \times 10^{-4}$             | 1.147          | 2     | $F_2$ | 1          | 2    | $F_1$ | 17        |
| 5442.157000                    | 5442.162564                    | -5.564                                                | $0.7339 \times 10^{-4}$             | $0.3346 \times 10^{-4}$             | 119.314        | 3     | $F_1$ | 1          | 4    | $F_2$ | 27        |
| 5443.210900                    | 5443.254702                    | -43.802                                               |                                     | $0.2179 \times 10^{-4}$             |                | 2     | $E$   | 1          | 2    | $E$   | 12        |
| 5443.535500                    | 5443.528181                    | 7.319                                                 | $0.1808 \times 10^{-4}$             | $0.2756 \times 10^{-4}$             | -34.389        | 2     | $F_2$ | 1          | 3    | $F_1$ | 23        |
| 5444.038000                    | 5444.002291                    | 35.709                                                | $0.6569 \times 10^{-4}$             | $0.6521 \times 10^{-4}$             | 0.737          | 4     | $E$   | 1          | 3    | $E$   | 20        |
| 5444.195300                    | 5444.144215                    | 51.085                                                | $0.1129 \times 10^{-3}$             | $0.1069 \times 10^{-3}$             | 5.613          | 4     | $F_1$ | 1          | 3    | $F_2$ | 29        |
| 5445.739695                    | 5445.741180                    | -1.485                                                |                                     | $0.1674 \times 10^{-3}$             |                | 4     | $A_1$ | 1          | 3    | $A_2$ | 11        |
| 5446.393000                    | 5446.404622                    | -11.622                                               | $0.3882 \times 10^{-4}$             | $0.2299 \times 10^{-4}$             | 68.852         | 3     | $F_2$ | 1          | 4    | $F_1$ | 26        |
| 5447.061100                    | 5447.095027                    | -33.927                                               | $0.2994 \times 10^{-3}$             | $0.2662 \times 10^{-3}$             | 12.451         | 8     | $F_2$ | 1          | 7    | $F_1$ | 71        |

Table II (continued).

| $\tilde{\nu}_e/\text{cm}^{-1}$ | $\tilde{\nu}_c/\text{cm}^{-1}$ | $\tilde{\nu}_e - \tilde{\nu}_c/10^{-3}\text{cm}^{-1}$ | $I_e/\text{cm}^{-2}\text{atm}^{-1}$ | $I_c/\text{cm}^{-2}\text{atm}^{-1}$ | $I_e - I_c/\%$ | $J''$ | $C''$ | $\alpha''$ | $J'$ | $C'$  | $\alpha'$ |
|--------------------------------|--------------------------------|-------------------------------------------------------|-------------------------------------|-------------------------------------|----------------|-------|-------|------------|------|-------|-----------|
| 5448.075500                    | 5448.159026                    | -83.526                                               | $0.7665 \times 10^{-5}$             | $0.9022 \times 10^{-5}$             | -15.043        | 1     | $F_1$ | 1          | 2    | $F_2$ | 18        |
| 5448.171200                    | 5448.162543                    | 8.657                                                 | $0.6515 \times 10^{-4}$             | $0.3392 \times 10^{-4}$             | 92.079         | 8     | $F_1$ | 2          | 7    | $F_2$ | 69        |
| 5448.243200                    | 5448.233602                    | 9.598                                                 | $0.2669 \times 10^{-3}$             | $0.2582 \times 10^{-3}$             | 3.358          | 8     | $F_1$ | 1          | 7    | $F_2$ | 69        |
| 5449.372000                    | 5449.307363                    | 64.637                                                | $0.1953 \times 10^{-3}$             | $0.1764 \times 10^{-3}$             | 10.741         | 3     | $A_2$ | 1          | 4    | $A_1$ | 11        |
| 5449.688000                    | 5449.709146                    | -21.146                                               |                                     | $0.5933 \times 10^{-5}$             |                | 3     | $F_2$ | 1          | 4    | $F_1$ | 27        |
| 5450.521500                    | 5450.507129                    | 14.371                                                |                                     | $0.1909 \times 10^{-3}$             |                | 8     | $F_1$ | 2          | 7    | $F_2$ | 71        |
| 5450.595000                    | 5450.578187                    | 16.813                                                | $0.8746 \times 10^{-4}$             | $0.8127 \times 10^{-4}$             | 7.618          | 8     | $F_1$ | 1          | 7    | $F_2$ | 71        |
| 5451.873300                    | 5451.877691                    | -4.391                                                |                                     | $0.3883 \times 10^{-4}$             |                | 4     | $A_1$ | 1          | 5    | $A_2$ | 12        |
| 5455.876700                    | 5455.866442                    | 10.258                                                | $0.5575 \times 10^{-4}$             | $0.1466 \times 10^{-4}$             | 280.243        | 4     | $F_2$ | 1          | 5    | $F_1$ | 34        |
| 5455.946000                    | 5455.975519                    | -29.519                                               | $0.4680 \times 10^{-4}$             | $0.2770 \times 10^{-4}$             | 68.930         | 4     | $E$   | 1          | 5    | $E$   | 21        |
| 5457.156000                    | 5457.120812                    | 35.188                                                |                                     | $0.1576 \times 10^{-3}$             |                | 6     | $A_2$ | 1          | 5    | $A_1$ | 17        |
| 5457.723000                    | 5457.702159                    | 20.841                                                | $0.1233 \times 10^{-3}$             | $0.1019 \times 10^{-3}$             | 20.990         | 6     | $F_2$ | 1          | 5    | $F_1$ | 55        |
| 5457.918500                    | 5457.905358                    | 13.142                                                | $0.8200 \times 10^{-4}$             | $0.7253 \times 10^{-4}$             | 13.058         | 6     | $E$   | 1          | 5    | $E$   | 34        |
| 5458.033900                    | 5458.038243                    | -4.343                                                |                                     | $0.5248 \times 10^{-5}$             |                | 3     | $F_2$ | 1          | 3    | $F_1$ | 28        |
| 5458.835600                    | 5458.878461                    | -42.861                                               |                                     | $0.5176 \times 10^{-5}$             |                | 2     | $F_2$ | 1          | 3    | $F_1$ | 24        |
| 5461.156536                    | 5461.170387                    | -13.851                                               |                                     | $0.3327 \times 10^{-5}$             |                | 2     | $F_2$ | 1          | 2    | $F_1$ | 19        |
| 5463.000500                    | 5462.963505                    | 36.995                                                | $0.5715 \times 10^{-4}$             | $0.5562 \times 10^{-4}$             | 2.754          | 4     | $F_1$ | 1          | 4    | $F_2$ | 35        |
| 5463.262900                    | 5463.234360                    | 28.540                                                | $0.9311 \times 10^{-4}$             | $0.8843 \times 10^{-4}$             | 5.295          | 4     | $A_1$ | 1          | 4    | $A_2$ | 11        |
| 5464.927000                    | 5464.936620                    | -9.620                                                |                                     | $0.2143 \times 10^{-3}$             |                | 11    | $E$   | 1          | 10   | $E$   | 88        |
| 5465.127500                    | 5465.079665                    | 47.835                                                |                                     | $0.3115 \times 10^{-3}$             |                | 11    | $F_2$ | 2          | 10   | $F_1$ | 128       |
| 5468.214900                    | 5468.303878                    | -88.978                                               |                                     | $0.5631 \times 10^{-5}$             |                | 9     | $F_1$ | 3          | 8    | $F_2$ | 96        |
| 5468.265300                    | 5468.353597                    | -88.297                                               |                                     | $0.2216 \times 10^{-4}$             |                | 9     | $F_1$ | 2          | 8    | $F_2$ | 96        |
| 5469.675400                    | 5469.642935                    | 32.465                                                | $0.1476 \times 10^{-3}$             | $0.1290 \times 10^{-3}$             | 14.455         | 7     | $F_2$ | 2          | 6    | $F_1$ | 63        |
| 5469.713200                    | 5469.680954                    | 32.246                                                | $0.2478 \times 10^{-3}$             | $0.2186 \times 10^{-3}$             | 13.380         | 7     | $F_2$ | 1          | 6    | $F_1$ | 63        |
| 5470.162800                    | 5470.170642                    | -7.842                                                | $0.1678 \times 10^{-4}$             | $0.1001 \times 10^{-4}$             | 67.603         | 7     | $F_1$ | 2          | 6    | $F_2$ | 67        |
| 5470.216800                    | 5470.226333                    | -9.533                                                | $0.4418 \times 10^{-3}$             | $0.3937 \times 10^{-3}$             | 12.226         | 7     | $F_1$ | 1          | 6    | $F_2$ | 67        |
| 5472.646300                    | 5472.678919                    | -32.619                                               | $0.1531 \times 10^{-3}$             | $0.1528 \times 10^{-3}$             | 0.193          | 7     | $F_2$ | 2          | 6    | $F_1$ | 65        |
| 5472.684300                    | 5472.716937                    | -32.637                                               | $0.2342 \times 10^{-3}$             | $0.2216 \times 10^{-3}$             | 5.685          | 7     | $F_2$ | 1          | 6    | $F_1$ | 65        |
| 5477.222100                    | 5477.269462                    | -47.362                                               |                                     | $0.4626 \times 10^{-6}$             |                | 10    | $F_1$ | 2          | 9    | $F_2$ | 118       |
| 5477.296700                    | 5477.344942                    | -48.242                                               | $0.5243 \times 10^{-3}$             | $0.4654 \times 10^{-3}$             | 12.667         | 10    | $F_1$ | 1          | 9    | $F_2$ | 118       |
| 5477.600900                    | 5477.527951                    | 72.949                                                |                                     | $0.4471 \times 10^{-3}$             |                | 10    | $F_2$ | 2          | 9    | $F_1$ | 121       |
| 5478.355300                    | 5478.353752                    | 1.548                                                 | $0.9896 \times 10^{-5}$             | $0.2593 \times 10^{-4}$             | -61.836        | 3     | $F_1$ | 1          | 4    | $F_2$ | 33        |
| 5478.875000                    | 5478.894304                    | -19.304                                               | $0.5118 \times 10^{-4}$             | $0.5256 \times 10^{-4}$             | -2.629         | 7     | $F_2$ | 2          | 6    | $F_1$ | 66        |
| 5478.913900                    | 5478.932323                    | -18.423                                               | $0.2118 \times 10^{-4}$             | $0.1676 \times 10^{-4}$             | 26.396         | 7     | $F_2$ | 1          | 6    | $F_1$ | 66        |
| 5479.475200                    | 5479.533564                    | -58.364                                               |                                     | $0.6028 \times 10^{-4}$             |                | 8     | $E$   | 2          | 7    | $E$   | 56        |
| 5479.559100                    | 5479.619206                    | -60.106                                               |                                     | $0.7502 \times 10^{-5}$             |                | 8     | $E$   | 1          | 7    | $E$   | 56        |
| 5483.938100                    | 5483.915983                    | 22.117                                                |                                     | $0.5759 \times 10^{-4}$             |                | 9     | $F_1$ | 3          | 8    | $F_2$ | 104       |
| 5483.989400                    | 5483.965702                    | 23.698                                                |                                     | $0.8685 \times 10^{-5}$             |                | 9     | $F_1$ | 2          | 8    | $F_2$ | 104       |
| 5484.076200                    | 5484.054024                    | 22.176                                                | $0.7679 \times 10^{-5}$             | $0.3852 \times 10^{-6}$             | 1893.307       | 9     | $F_1$ | 1          | 8    | $F_2$ | 104       |
| 5484.509800                    | 5484.571799                    | -61.999                                               | $0.1557 \times 10^{-4}$             | $0.1292 \times 10^{-5}$             | 1104.941       | 9     | $F_2$ | 2          | 8    | $F_1$ | 103       |
| 5484.654700                    | 5484.716514                    | -61.814                                               |                                     | $0.5493 \times 10^{-5}$             |                | 9     | $F_2$ | 1          | 8    | $F_1$ | 103       |
| 5491.559000                    | 5491.562227                    | -3.227                                                | $0.1421 \times 10^{-3}$             | $0.1078 \times 10^{-3}$             | 31.870         | 6     | $F_2$ | 2          | 5    | $F_1$ | 57        |
| 5491.580500                    | 5491.583943                    | -3.443                                                | $0.3770 \times 10^{-3}$             | $0.3591 \times 10^{-3}$             | 4.981          | 6     | $F_2$ | 1          | 5    | $F_1$ | 57        |
| 5491.856300                    | 5491.839926                    | 16.374                                                | $0.3848 \times 10^{-3}$             | $0.3438 \times 10^{-3}$             | 11.938         | 6     | $E$   | 1          | 5    | $E$   | 37        |
| 5493.446900                    | 5493.367768                    | 79.132                                                | $0.6542 \times 10^{-3}$             | $0.6466 \times 10^{-3}$             | 1.174          | 7     | $A_2$ | 1          | 6    | $A_1$ | 24        |
| 5493.724300                    | 5493.748097                    | -23.797                                               | $0.3229 \times 10^{-3}$             | $0.2745 \times 10^{-3}$             | 17.618         | 7     | $F_2$ | 2          | 6    | $F_1$ | 67        |
| 5493.762100                    | 5493.786116                    | -24.016                                               |                                     | $0.2267 \times 10^{-4}$             |                | 7     | $F_2$ | 1          | 6    | $F_1$ | 67        |
| 5493.989400                    | 5494.001301                    | -11.901                                               |                                     | $0.1807 \times 10^{-3}$             |                | 7     | $E$   | 1          | 6    | $E$   | 47        |
| 5494.227700                    | 5494.225564                    | 2.136                                                 | $0.1955 \times 10^{-3}$             | $0.1660 \times 10^{-3}$             | 17.748         | 6     | $F_1$ | 1          | 5    | $F_2$ | 54        |
| 5494.349300                    | 5494.338319                    | 10.981                                                | $0.2154 \times 10^{-3}$             | $0.1932 \times 10^{-3}$             | 11.483         | 6     | $F_2$ | 2          | 5    | $F_1$ | 58        |

Table II (continued).

| $\tilde{\nu}_e/\text{cm}^{-1}$ | $\tilde{\nu}_c/\text{cm}^{-1}$ | $\tilde{\nu}_e - \tilde{\nu}_c/10^{-3}\text{cm}^{-1}$ | $I_e/\text{cm}^{-2}\text{atm}^{-1}$ | $I_c/\text{cm}^{-2}\text{atm}^{-1}$ | $I_e - I_c/\%$ | $J''$ | $C''$ | $\alpha''$ | $J'$ | $C'$  | $\alpha'$ |
|--------------------------------|--------------------------------|-------------------------------------------------------|-------------------------------------|-------------------------------------|----------------|-------|-------|------------|------|-------|-----------|
| 5494.371000                    | 5494.360036                    | 10.964                                                | $0.1842 \times 10^{-3}$             | $0.1673 \times 10^{-3}$             | 10.133         | 6     | $F_2$ | 1          | 5    | $F_1$ | 58        |
| 5494.421000                    | 5494.379172                    | 41.828                                                | $0.7868 \times 10^{-3}$             | $0.7820 \times 10^{-3}$             | 0.609          | 6     | $A_2$ | 1          | 5    | $A_1$ | 19        |
| 5496.212500                    | 5496.220739                    | -8.239                                                |                                     | $0.3308 \times 10^{-4}$             |                | 8     | $F_2$ | 2          | 7    | $F_1$ | 93        |
| 5497.058000                    | 5496.995052                    | 62.948                                                |                                     | $0.6568 \times 10^{-4}$             |                | 7     | $F_2$ | 2          | 6    | $F_1$ | 69        |
| 5497.096000                    | 5497.033070                    | 62.930                                                |                                     | $0.5166 \times 10^{-5}$             |                | 7     | $F_2$ | 1          | 6    | $F_1$ | 69        |
| 5498.821300                    | 5498.805719                    | 15.581                                                |                                     | $0.1641 \times 10^{-3}$             |                | 8     | $E$   | 2          | 7    | $E$   | 61        |
| 5498.907500                    | 5498.891361                    | 16.139                                                | $0.7143 \times 10^{-3}$             | $0.7649 \times 10^{-3}$             | -6.620         | 8     | $E$   | 1          | 7    | $E$   | 61        |
| 5499.091300                    | 5499.018845                    | 72.455                                                |                                     | $0.4200 \times 10^{-4}$             |                | 8     | $F_1$ | 2          | 7    | $F_2$ | 92        |
| 5499.161800                    | 5499.089903                    | 71.897                                                | $0.1771 \times 10^{-2}$             | $0.1484 \times 10^{-2}$             | 19.353         | 8     | $F_1$ | 1          | 7    | $F_2$ | 92        |
| 5499.337200                    | 5499.203523                    | 133.677                                               | $0.3736 \times 10^{-2}$             | $0.2648 \times 10^{-2}$             | 41.082         | 8     | $A_1$ | 1          | 7    | $A_2$ | 33        |
| 5499.506500                    | 5499.568938                    | -62.438                                               |                                     | $0.2345 \times 10^{-3}$             |                | 8     | $E$   | 1          | 7    | $E$   | 62        |
| 5501.673096                    | 5501.640131                    | 32.965                                                |                                     | $0.7647 \times 10^{-4}$             |                | 8     | $F_2$ | 2          | 7    | $F_1$ | 96        |
| 5501.715400                    | 5501.680526                    | 34.874                                                | $0.9835 \times 10^{-3}$             | $0.8719 \times 10^{-3}$             | 12.802         | 8     | $F_2$ | 1          | 7    | $F_1$ | 96        |
| 5506.392517                    | 5506.394656                    | -2.139                                                |                                     | $0.1632 \times 10^{-5}$             |                | 7     | $E$   | 1          | 6    | $E$   | 52        |
| 5506.635370                    | 5506.630894                    | 4.476                                                 |                                     | $0.3074 \times 10^{-4}$             |                | 7     | $F_2$ | 2          | 6    | $F_1$ | 74        |
| 5506.675645                    | 5506.752407                    | -76.762                                               |                                     | $0.4748 \times 10^{-4}$             |                | 7     | $A_2$ | 1          | 6    | $A_1$ | 26        |
| 5506.766711                    | 5506.769947                    | -3.236                                                |                                     | $0.2630 \times 10^{-6}$             |                | 7     | $F_2$ | 2          | 6    | $F_1$ | 75        |
| 5507.745607                    | 5507.677864                    | 67.743                                                |                                     | $0.4360 \times 10^{-4}$             |                | 7     | $F_1$ | 2          | 6    | $F_2$ | 81        |
| 5509.336200                    | 5509.307290                    | 28.910                                                | $0.2569 \times 10^{-3}$             | $0.8842 \times 10^{-4}$             | 190.554        | 7     | $F_2$ | 2          | 6    | $F_1$ | 76        |
| 5509.375800                    | 5509.345309                    | 30.491                                                |                                     | $0.9651 \times 10^{-4}$             |                | 7     | $F_2$ | 1          | 6    | $F_1$ | 76        |
| 5509.562685                    | 5509.633895                    | -71.210                                               |                                     | $0.2794 \times 10^{-4}$             |                | 6     | $F_1$ | 1          | 5    | $F_2$ | 57        |
| 5511.710600                    | 5511.715903                    | -5.303                                                |                                     | $0.4554 \times 10^{-3}$             |                | 7     | $A_2$ | 1          | 6    | $A_1$ | 27        |
| 5511.819100                    | 5511.852134                    | -33.034                                               | $0.1935 \times 10^{-2}$             | $0.2091 \times 10^{-2}$             | -7.467         | 7     | $F_1$ | 1          | 6    | $F_2$ | 83        |
| 5511.841000                    | 5511.885183                    | -44.183                                               | $0.2131 \times 10^{-2}$             | $0.1391 \times 10^{-2}$             | 53.217         | 7     | $F_2$ | 1          | 6    | $F_1$ | 79        |
| 5511.933851                    | 5511.932162                    | 1.689                                                 |                                     | $0.2872 \times 10^{-3}$             |                | 6     | $F_2$ | 2          | 5    | $F_1$ | 62        |
| 5511.955261                    | 5511.953878                    | 1.383                                                 |                                     | $0.2101 \times 10^{-4}$             |                | 6     | $F_2$ | 1          | 5    | $F_1$ | 62        |
| 5512.616200                    | 5512.708683                    | -92.483                                               | $0.1580 \times 10^{-2}$             | $0.1638 \times 10^{-2}$             | -3.557         | 7     | $F_1$ | 2          | 6    | $F_2$ | 84        |
| 5513.287400                    | 5513.263845                    | 23.555                                                | $0.5358 \times 10^{-3}$             | $0.5580 \times 10^{-3}$             | -3.975         | 5     | $F_1$ | 1          | 4    | $F_2$ | 47        |
| 5513.379500                    | 5513.284269                    | 95.231                                                |                                     | $0.8663 \times 10^{-3}$             |                | 7     | $E$   | 1          | 6    | $E$   | 56        |
| 5513.760484                    | 5513.789209                    | -28.725                                               |                                     | $0.1147 \times 10^{-2}$             |                | 7     | $F_2$ | 2          | 6    | $F_1$ | 80        |
| 5515.231500                    | 5515.268964                    | -37.464                                               | $0.1805 \times 10^{-3}$             | $0.1286 \times 10^{-3}$             | 40.376         | 5     | $E$   | 1          | 4    | $E$   | 32        |
| 5515.295754                    | 5515.363170                    | -67.416                                               |                                     | $0.1215 \times 10^{-3}$             |                | 6     | $F_2$ | 2          | 5    | $F_1$ | 64        |
| 5515.318100                    | 5515.384886                    | -66.786                                               | $0.2072 \times 10^{-3}$             | $0.1342 \times 10^{-3}$             | 54.359         | 6     | $F_2$ | 1          | 5    | $F_1$ | 64        |
| 5515.540800                    | 5515.523838                    | 16.962                                                | $0.4673 \times 10^{-3}$             | $0.4188 \times 10^{-3}$             | 11.581         | 5     | $F_2$ | 1          | 4    | $F_1$ | 46        |
| 5517.372685                    | 5517.336183                    | 36.502                                                |                                     | $0.1527 \times 10^{-9}$             |                | 2     | $E$   | 1          | 3    | $E$   | 20        |
| 5519.343100                    | 5519.336312                    | 6.788                                                 |                                     | $0.4134 \times 10^{-4}$             |                | 6     | $F_1$ | 1          | 5    | $F_2$ | 63        |
| 5519.595900                    | 5519.601151                    | -5.251                                                | $0.1253 \times 10^{-3}$             | $0.1262 \times 10^{-3}$             | -0.752         | 5     | $F_2$ | 1          | 4    | $F_1$ | 47        |
| 5519.681300                    | 5519.673388                    | 7.912                                                 | $0.4085 \times 10^{-3}$             | $0.3667 \times 10^{-3}$             | 11.394         | 5     | $F_1$ | 2          | 4    | $F_2$ | 49        |
| 5519.695000                    | 5519.687968                    | 7.032                                                 |                                     | $0.5810 \times 10^{-4}$             |                | 5     | $F_1$ | 1          | 4    | $F_2$ | 49        |
| 5520.687246                    | 5520.654800                    | 32.446                                                |                                     | $0.8419 \times 10^{-6}$             |                | 6     | $F_1$ | 1          | 5    | $F_2$ | 64        |
| 5523.231200                    | 5523.225900                    | 5.300                                                 | $0.4404 \times 10^{-3}$             | $0.4717 \times 10^{-3}$             | -6.635         | 6     | $F_2$ | 2          | 5    | $F_1$ | 68        |
| 5523.310500                    | 5523.234309                    | 76.191                                                | $0.8195 \times 10^{-3}$             | $0.5858 \times 10^{-3}$             | 39.896         | 6     | $E$   | 1          | 5    | $E$   | 44        |
| 5523.252900                    | 5523.247616                    | 5.284                                                 | $0.1575 \times 10^{-2}$             | $0.1408 \times 10^{-2}$             | 11.824         | 6     | $F_2$ | 1          | 5    | $F_1$ | 68        |
| 5523.336300                    | 5523.438083                    | -101.783                                              | $0.4134 \times 10^{-2}$             | $0.3974 \times 10^{-2}$             | 4.037          | 6     | $A_2$ | 1          | 5    | $A_1$ | 21        |
| 5524.303500                    | 5524.216087                    | 87.413                                                | $0.8978 \times 10^{-3}$             | $0.1010 \times 10^{-2}$             | -11.119        | 6     | $E$   | 1          | 5    | $E$   | 45        |
| 5524.411500                    | 5524.341844                    | 69.656                                                | $0.8171 \times 10^{-3}$             | $0.7158 \times 10^{-3}$             | 14.147         | 6     | $F_2$ | 2          | 5    | $F_1$ | 69        |
| 5524.432700                    | 5524.363560                    | 69.140                                                | $0.8049 \times 10^{-3}$             | $0.9074 \times 10^{-3}$             | -11.297        | 6     | $F_2$ | 1          | 5    | $F_1$ | 69        |
| 5524.726900                    | 5524.655252                    | 71.648                                                |                                     | $0.3124 \times 10^{-2}$             |                | 6     | $A_1$ | 1          | 5    | $A_2$ | 25        |
| 5526.283760                    | 5526.242963                    | 40.797                                                |                                     | $0.2352 \times 10^{-3}$             |                | 7     | $F_2$ | 2          | 6    | $F_1$ | 83        |
| 5526.322148                    | 5526.280981                    | 41.167                                                |                                     | $0.4051 \times 10^{-4}$             |                | 7     | $F_2$ | 1          | 6    | $F_1$ | 83        |

Table II (continued).

| $\tilde{\nu}_e/\text{cm}^{-1}$ | $\tilde{\nu}_c/\text{cm}^{-1}$ | $\tilde{\nu}_e - \tilde{\nu}_c/10^{-3}\text{cm}^{-1}$ | $I_e/\text{cm}^{-2}\text{atm}^{-1}$ | $I_c/\text{cm}^{-2}\text{atm}^{-1}$ | $I_e - I_c/\%$ | $J''$ | $C''$ | $\alpha''$ | $J'$ | $C'$  | $\alpha'$ |
|--------------------------------|--------------------------------|-------------------------------------------------------|-------------------------------------|-------------------------------------|----------------|-------|-------|------------|------|-------|-----------|
| 5530.525200                    | 5530.212552                    | 312.648                                               | $0.1326 \times 10^{-2}$             | $0.1193 \times 10^{-2}$             | 11.127         | 5     | $E$   | 1          | 4    | $E$   | 34        |
| 5530.333800                    | 5530.374163                    | -40.363                                               | $0.1108 \times 10^{-2}$             | $0.8707 \times 10^{-3}$             | 27.247         | 5     | $F_1$ | 2          | 4    | $F_2$ | 51        |
| 5530.682507                    | 5530.716319                    | -33.812                                               |                                     | $0.8431 \times 10^{-4}$             |                | 7     | $F_2$ | 2          | 7    | $F_1$ | 71        |
| 5530.719994                    | 5530.754338                    | -34.344                                               |                                     | $0.5776 \times 10^{-4}$             |                | 7     | $F_2$ | 1          | 7    | $F_1$ | 71        |
| 5532.308343                    | 5532.284962                    | 23.381                                                |                                     | $0.1826 \times 10^{-3}$             |                | 5     | $F_1$ | 2          | 4    | $F_2$ | 52        |
| 5532.503132                    | 5532.542765                    | -39.633                                               |                                     | $0.7703 \times 10^{-4}$             |                | 5     | $E$   | 1          | 4    | $E$   | 35        |
| 5534.340300                    | 5534.376333                    | -36.033                                               | $0.1238 \times 10^{-2}$             | $0.1157 \times 10^{-2}$             | 7.004          | 5     | $F_1$ | 2          | 4    | $F_2$ | 54        |
| 5534.354800                    | 5534.390913                    | -36.113                                               | $0.7902 \times 10^{-3}$             | $0.6514 \times 10^{-3}$             | 21.315         | 5     | $F_1$ | 1          | 4    | $F_2$ | 54        |
| 5534.508400                    | 5534.505524                    | 2.876                                                 | $0.1189 \times 10^{-2}$             | $0.1042 \times 10^{-2}$             | 14.156         | 4     | $A_1$ | 1          | 3    | $A_2$ | 14        |
| 5534.491500                    | 5534.519285                    | -27.785                                               | $0.1331 \times 10^{-2}$             | $0.9541 \times 10^{-3}$             | 39.509         | 5     | $F_2$ | 1          | 4    | $F_1$ | 52        |
| 5535.140900                    | 5535.186791                    | -45.891                                               | $0.1387 \times 10^{-2}$             | $0.1464 \times 10^{-2}$             | -5.267         | 5     | $F_2$ | 1          | 4    | $F_1$ | 53        |
| 5535.381000                    | 5535.390881                    | -9.881                                                |                                     | $0.1243 \times 10^{-3}$             |                | 5     | $F_1$ | 2          | 4    | $F_2$ | 55        |
| 5535.396400                    | 5535.405461                    | -9.061                                                | $0.1964 \times 10^{-2}$             | $0.1895 \times 10^{-2}$             | 3.616          | 5     | $F_1$ | 1          | 4    | $F_2$ | 55        |
| 5535.655448                    | 5535.628035                    | 27.413                                                |                                     | $0.5208 \times 10^{-3}$             |                | 5     | $E$   | 1          | 4    | $E$   | 36        |
| 5535.716760                    | 5535.648910                    | 67.850                                                |                                     | $0.4342 \times 10^{-4}$             |                | 6     | $F_2$ | 2          | 5    | $F_1$ | 73        |
| 5535.888200                    | 5535.884392                    | 3.808                                                 | $0.5260 \times 10^{-3}$             | $0.4768 \times 10^{-3}$             | 10.315         | 4     | $F_1$ | 1          | 3    | $F_2$ | 36        |
| 5537.841310                    | 5537.878026                    | -36.716                                               |                                     | $0.2384 \times 10^{-3}$             |                | 6     | $F_2$ | 2          | 5    | $F_1$ | 74        |
| 5537.863003                    | 5537.899742                    | -36.739                                               |                                     | $0.4457 \times 10^{-4}$             |                | 6     | $F_2$ | 1          | 5    | $F_1$ | 74        |
| 5538.264601                    | 5538.214376                    | 50.225                                                |                                     | $0.2338 \times 10^{-3}$             |                | 5     | $E$   | 1          | 4    | $E$   | 37        |
| 5538.610900                    | 5538.550360                    | 60.540                                                |                                     | $0.3261 \times 10^{-3}$             |                | 5     | $F_1$ | 2          | 4    | $F_2$ | 56        |
| 5538.895932                    | 5538.830236                    | 65.696                                                |                                     | $0.1521 \times 10^{-3}$             |                | 4     | $F_2$ | 1          | 3    | $F_1$ | 38        |
| 5539.476700                    | 5539.462948                    | 13.752                                                | $0.5015 \times 10^{-3}$             | $0.4449 \times 10^{-3}$             | 12.730         | 4     | $E$   | 1          | 3    | $E$   | 25        |
| 5540.631311                    | 5540.597633                    | 33.678                                                |                                     | $0.3385 \times 10^{-5}$             |                | 6     | $F_1$ | 1          | 5    | $F_2$ | 72        |
| 5542.328267                    | 5542.260328                    | 67.939                                                |                                     | $0.2055 \times 10^{-4}$             |                | 4     | $E$   | 1          | 3    | $E$   | 26        |
| 5542.247244                    | 5542.340568                    | -93.324                                               |                                     | $0.1810 \times 10^{-4}$             |                | 4     | $F_2$ | 1          | 3    | $F_1$ | 39        |
| 5542.903052                    | 5542.870722                    | 32.330                                                |                                     | $0.9151 \times 10^{-4}$             |                | 6     | $F_2$ | 2          | 6    | $F_1$ | 63        |
| 5542.924103                    | 5542.892439                    | 31.664                                                |                                     | $0.4706 \times 10^{-4}$             |                | 6     | $F_2$ | 1          | 6    | $F_1$ | 63        |
| 5543.192532                    | 5543.200263                    | -7.731                                                |                                     | $0.2558 \times 10^{-4}$             |                | 5     | $F_1$ | 2          | 4    | $F_2$ | 57        |
| 5543.207500                    | 5543.214844                    | -7.344                                                |                                     | $0.3029 \times 10^{-5}$             |                | 5     | $F_1$ | 1          | 4    | $F_2$ | 57        |
| 5543.398829                    | 5543.408043                    | -9.214                                                |                                     | $0.5586 \times 10^{-4}$             |                | 6     | $F_1$ | 1          | 6    | $F_2$ | 67        |
| 5543.842742                    | 5543.765335                    | 77.407                                                |                                     | $0.3921 \times 10^{-3}$             |                | 4     | $F_2$ | 1          | 3    | $F_1$ | 40        |
| 5543.943166                    | 5543.941864                    | 1.302                                                 |                                     | $0.2619 \times 10^{-5}$             |                | 5     | $F_2$ | 1          | 4    | $F_1$ | 54        |
| 5544.976600                    | 5545.105125                    | -128.525                                              | $0.2544 \times 10^{-2}$             | $0.2636 \times 10^{-2}$             | -3.498         | 4     | $F_2$ | 1          | 3    | $F_1$ | 41        |
| 5545.895360                    | 5545.928422                    | -33.062                                               |                                     | $0.1248 \times 10^{-4}$             |                | 6     | $F_2$ | 1          | 6    | $F_1$ | 65        |
| 5545.978000                    | 5545.963103                    | 14.897                                                | $0.1776 \times 10^{-2}$             | $0.1740 \times 10^{-2}$             | 2.046          | 4     | $E$   | 1          | 3    | $E$   | 27        |
| 5546.194900                    | 5546.218516                    | -23.616                                               | $0.4819 \times 10^{-2}$             | $0.4557 \times 10^{-2}$             | 5.754          | 4     | $A_1$ | 1          | 3    | $A_2$ | 15        |
| 5549.342784                    | 5549.351063                    | -8.279                                                |                                     | $0.2034 \times 10^{-4}$             |                | 5     | $F_1$ | 2          | 4    | $F_2$ | 59        |
| 5549.357000                    | 5549.365643                    | -8.643                                                |                                     | $0.7872 \times 10^{-5}$             |                | 5     | $F_1$ | 1          | 4    | $F_2$ | 59        |
| 5550.881782                    | 5550.893352                    | -11.570                                               |                                     | $0.6138 \times 10^{-4}$             |                | 5     | $F_1$ | 2          | 4    | $F_2$ | 60        |
| 5550.894847                    | 5550.907933                    | -13.086                                               |                                     | $0.2643 \times 10^{-5}$             |                | 5     | $F_1$ | 1          | 4    | $F_2$ | 60        |
| 5552.029547                    | 5552.031357                    | -1.810                                                |                                     | $0.6164 \times 10^{-4}$             |                | 5     | $F_1$ | 2          | 4    | $F_2$ | 61        |
| 5552.042000                    | 5552.045937                    | -3.937                                                |                                     | $0.5639 \times 10^{-4}$             |                | 5     | $F_1$ | 1          | 4    | $F_2$ | 61        |
| 5552.104000                    | 5552.122091                    | -18.091                                               |                                     | $0.9399 \times 10^{-4}$             |                | 6     | $F_2$ | 2          | 6    | $F_1$ | 66        |
| 5552.123708                    | 5552.143807                    | -20.099                                               |                                     | $0.1475 \times 10^{-4}$             |                | 6     | $F_2$ | 1          | 6    | $F_1$ | 66        |
| 5552.754303                    | 5552.751198                    | 3.105                                                 |                                     | $0.3250 \times 10^{-4}$             |                | 5     | $F_1$ | 2          | 4    | $F_2$ | 62        |
| 5552.767851                    | 5552.765779                    | 2.072                                                 |                                     | $0.9496 \times 10^{-4}$             |                | 5     | $F_1$ | 1          | 4    | $F_2$ | 62        |
| 5554.139826                    | 5554.103820                    | 36.006                                                |                                     | $0.5526 \times 10^{-5}$             |                | 3     | $F_1$ | 1          | 2    | $F_2$ | 28        |
| 5554.369280                    | 5554.371051                    | -1.771                                                | $0.1359 \times 10^{-3}$             | $0.1047 \times 10^{-3}$             | 29.797         | 5     | $F_2$ | 1          | 5    | $F_1$ | 57        |
| 5554.632647                    | 5554.616182                    | 16.465                                                |                                     | $0.4336 \times 10^{-4}$             |                | 5     | $E$   | 1          | 5    | $E$   | 37        |
| 5555.255116                    | 5555.233803                    | 21.313                                                |                                     | $0.4122 \times 10^{-4}$             |                | 3     | $F_2$ | 1          | 2    | $F_1$ | 25        |



Table II (continued).

| $\tilde{\nu}_e/\text{cm}^{-1}$ | $\tilde{\nu}_c/\text{cm}^{-1}$ | $\tilde{\nu}_e - \tilde{\nu}_c/10^{-3}\text{cm}^{-1}$ | $I_e/\text{cm}^{-2}\text{atm}^{-1}$ | $I_c/\text{cm}^{-2}\text{atm}^{-1}$ | $I_e - I_c/\%$ | $J''$ | $C''$ | $\alpha''$ | $J'$ | $C'$  | $\alpha'$ |
|--------------------------------|--------------------------------|-------------------------------------------------------|-------------------------------------|-------------------------------------|----------------|-------|-------|------------|------|-------|-----------|
| 5556.330000                    | 5556.323953                    | 6.047                                                 | $0.4404 \times 10^{-2}$             | $0.4223 \times 10^{-2}$             | 4.295          | 3     | $A_2$ | 1          | 2    | $A_1$ | 11        |
| 5556.437000                    | 5556.476242                    | -39.242                                               | $0.2691 \times 10^{-2}$             | $0.2581 \times 10^{-2}$             | 4.259          | 3     | $F_1$ | 1          | 2    | $F_2$ | 29        |
| 5556.524997                    | 5556.539753                    | -14.756                                               |                                     | $0.9209 \times 10^{-5}$             |                | 4     | $F_2$ | 1          | 3    | $F_1$ | 44        |
| 5556.575000                    | 5556.590436                    | -15.436                                               | $0.2691 \times 10^{-2}$             | $0.2560 \times 10^{-2}$             | 5.113          | 3     | $F_2$ | 1          | 2    | $F_1$ | 26        |
| 5557.031920                    | 5557.027893                    | 4.027                                                 | $0.1429 \times 10^{-3}$             | $0.1254 \times 10^{-3}$             | 13.993         | 5     | $F_1$ | 2          | 5    | $F_2$ | 54        |
| 5557.158164                    | 5557.147144                    | 11.020                                                |                                     | $0.2528 \times 10^{-4}$             |                | 5     | $F_2$ | 1          | 5    | $F_1$ | 58        |
| 5557.699140                    | 5557.665122                    | 34.018                                                | $0.1703 \times 10^{-3}$             | $0.1646 \times 10^{-3}$             | 3.441          | 3     | $F_1$ | 1          | 2    | $F_2$ | 30        |
| 5558.839000                    | 5558.835897                    | 3.103                                                 |                                     | $0.7889 \times 10^{-5}$             |                | 7     | $E$   | 1          | 6    | $E$   | 67        |
| 5561.835000                    | 5561.810046                    | 24.954                                                |                                     | $0.4622 \times 10^{-4}$             |                | 7     | $F_2$ | 2          | 6    | $F_1$ | 98        |
| 5561.873226                    | 5561.848065                    | 25.161                                                |                                     | $0.3625 \times 10^{-4}$             |                | 7     | $F_2$ | 1          | 6    | $F_1$ | 98        |
| 5563.127000                    | 5563.184704                    | -57.704                                               |                                     | $0.7488 \times 10^{-5}$             |                | 7     | $E$   | 1          | 7    | $E$   | 56        |
| 5563.210210                    | 5563.201177                    | 9.033                                                 | $0.2068 \times 10^{-3}$             | $0.3118 \times 10^{-3}$             | -33.672        | 7     | $F_1$ | 2          | 6    | $F_2$ | 103       |
| 5563.525070                    | 5563.599080                    | -74.010                                               | $0.2591 \times 10^{-3}$             | $0.2471 \times 10^{-3}$             | 4.853          | 3     | $F_2$ | 1          | 2    | $F_1$ | 27        |
| 5563.971500                    | 5564.003936                    | -32.436                                               |                                     | $0.1975 \times 10^{-3}$             |                | 4     | $F_2$ | 1          | 3    | $F_1$ | 48        |
| 5564.724070                    | 5564.775753                    | -51.683                                               | $0.1717 \times 10^{-3}$             | $0.2274 \times 10^{-3}$             | -24.484        | 10    | $A_1$ | 1          | 10   | $A_2$ | 41        |
| 5565.638500                    | 5565.613466                    | 25.034                                                |                                     | $0.4509 \times 10^{-4}$             |                | 4     | $F_1$ | 1          | 4    | $F_2$ | 47        |
| 5566.681700                    | 5566.602096                    | 79.604                                                |                                     | $0.1731 \times 10^{-3}$             |                | 6     | $A_2$ | 1          | 6    | $A_1$ | 24        |
| 5566.952912                    | 5566.975884                    | -22.972                                               |                                     | $0.4838 \times 10^{-5}$             |                | 6     | $F_2$ | 2          | 6    | $F_1$ | 67        |
| 5566.975096                    | 5566.997601                    | -22.505                                               |                                     | $0.1228 \times 10^{-3}$             |                | 6     | $F_2$ | 1          | 6    | $F_1$ | 67        |
| 5567.191300                    | 5567.173770                    | 17.530                                                | $0.1862 \times 10^{-2}$             | $0.1701 \times 10^{-2}$             | 9.488          | 2     | $F_2$ | 1          | 1    | $F_1$ | 18        |
| 5567.247000                    | 5567.257956                    | -10.956                                               |                                     | $0.8459 \times 10^{-4}$             |                | 6     | $E$   | 1          | 6    | $E$   | 47        |
| 5567.294900                    | 5567.293373                    | 1.527                                                 | $0.1187 \times 10^{-2}$             | $0.1138 \times 10^{-2}$             | 4.306          | 2     | $E$   | 1          | 1    | $E$   | 11        |
| 5567.592700                    | 5567.630112                    | -37.412                                               | $0.1113 \times 10^{-3}$             | $0.1405 \times 10^{-3}$             | -20.799        | 4     | $E$   | 1          | 4    | $E$   | 32        |
| 5567.888800                    | 5567.871741                    | 17.059                                                | $0.5382 \times 10^{-4}$             | $0.4064 \times 10^{-4}$             | 32.415         | 4     | $F_2$ | 1          | 4    | $F_1$ | 46        |
| 5570.285921                    | 5570.222839                    | 63.082                                                |                                     | $0.8229 \times 10^{-4}$             |                | 6     | $F_2$ | 2          | 6    | $F_1$ | 69        |
| 5570.306931                    | 5570.244555                    | 62.376                                                |                                     | $0.3869 \times 10^{-4}$             |                | 6     | $F_2$ | 1          | 6    | $F_1$ | 69        |
| 5571.944400                    | 5571.949054                    | -4.654                                                | $0.1135 \times 10^{-3}$             | $0.1017 \times 10^{-3}$             | 11.598         | 4     | $F_2$ | 1          | 4    | $F_1$ | 47        |
| 5572.046920                    | 5572.037589                    | 9.331                                                 | $0.4726 \times 10^{-4}$             | $0.4598 \times 10^{-4}$             | 2.774          | 4     | $F_1$ | 1          | 4    | $F_2$ | 49        |
| 5572.380950                    | 5572.450805                    | -69.855                                               |                                     | $0.1328 \times 10^{-4}$             |                | 5     | $F_1$ | 1          | 5    | $F_2$ | 57        |
| 5574.743125                    | 5574.740987                    | 2.138                                                 |                                     | $0.1762 \times 10^{-3}$             |                | 5     | $F_2$ | 1          | 5    | $F_1$ | 62        |
| 5574.956150                    | 5574.888506                    | 67.644                                                | $0.8790 \times 10^{-4}$             | $0.7396 \times 10^{-4}$             | 18.850         | 3     | $F_2$ | 1          | 2    | $F_1$ | 29        |
| 5574.989200                    | 5574.975256                    | 13.944                                                | $0.1480 \times 10^{-2}$             | $0.1666 \times 10^{-2}$             | -11.149        | 9     | $A_1$ | 1          | 9    | $A_2$ | 39        |
| 5576.071012                    | 5576.039302                    | 31.710                                                |                                     | $0.3753 \times 10^{-4}$             |                | 5     | $F_1$ | 2          | 4    | $F_2$ | 68        |
| 5577.495010                    | 5577.485322                    | 9.688                                                 | $0.7095 \times 10^{-3}$             | $0.6096 \times 10^{-3}$             | 16.394         | 1     | $F_1$ | 1          | 0    | $F_2$ | 7         |
| 5577.788619                    | 5577.783307                    | 5.312                                                 |                                     | $0.5633 \times 10^{-4}$             |                | 3     | $F_1$ | 1          | 3    | $F_2$ | 36        |
| 5577.818457                    | 5577.851778                    | -33.321                                               |                                     | $0.2285 \times 10^{-3}$             |                | 5     | $E$   | 1          | 4    | $E$   | 46        |
| 5577.990200                    | 5577.966192                    | 24.008                                                |                                     | $0.1521 \times 10^{-2}$             |                | 8     | $F_1$ | 2          | 8    | $F_2$ | 104       |
| 5577.979000                    | 5577.979918                    | -0.918                                                |                                     | $0.8790 \times 10^{-5}$             |                | 4     | $F_2$ | 1          | 3    | $F_1$ | 50        |
| 5578.106570                    | 5578.171994                    | -65.424                                               |                                     | $0.4542 \times 10^{-4}$             |                | 5     | $F_2$ | 1          | 5    | $F_1$ | 64        |
| 5578.276920                    | 5578.280096                    | -3.176                                                |                                     | $0.3108 \times 10^{-3}$             |                | 5     | $F_1$ | 2          | 4    | $F_2$ | 70        |
| 5578.549600                    | 5578.610575                    | -60.975                                               | $0.1223 \times 10^{-2}$             | $0.1472 \times 10^{-2}$             | -16.933        | 8     | $F_2$ | 2          | 8    | $F_1$ | 103       |
| 5578.676600                    | 5578.670175                    | 6.425                                                 | $0.9394 \times 10^{-3}$             | $0.9791 \times 10^{-3}$             | -4.050         | 8     | $E$   | 2          | 8    | $E$   | 70        |
| 5579.004350                    | 5578.982023                    | 22.327                                                | $0.7625 \times 10^{-4}$             | $0.9896 \times 10^{-4}$             | -22.951        | 4     | $F_2$ | 1          | 3    | $F_1$ | 51        |
| 5579.353100                    | 5579.360501                    | -7.401                                                | $0.2618 \times 10^{-2}$             | $0.2165 \times 10^{-2}$             | 20.915         | 7     | $A_2$ | 1          | 7    | $A_1$ | 29        |
| 5579.650370                    | 5579.651311                    | -0.941                                                |                                     | $0.2850 \times 10^{-3}$             |                | 6     | $E$   | 1          | 6    | $E$   | 52        |
| 5579.887000                    | 5579.880397                    | 6.603                                                 |                                     | $0.8319 \times 10^{-3}$             |                | 6     | $F_2$ | 1          | 6    | $F_1$ | 74        |
| 5579.875100                    | 5579.882426                    | -7.326                                                |                                     | $0.1121 \times 10^{-2}$             |                | 7     | $F_2$ | 2          | 7    | $F_1$ | 93        |
| 5579.952220                    | 5579.903914                    | 48.306                                                | $0.1073 \times 10^{-3}$             | $0.1161 \times 10^{-3}$             | -7.587         | 10    | $F_2$ | 1          | 10   | $F_1$ | 128       |
| 5579.911400                    | 5579.986735                    | -75.335                                               | $0.1700 \times 10^{-2}$             | $0.1687 \times 10^{-2}$             | 0.798          | 6     | $A_2$ | 1          | 6    | $A_1$ | 26        |
| 5579.996010                    | 5579.997734                    | -1.724                                                |                                     | $0.2022 \times 10^{-4}$             |                | 6     | $F_2$ | 2          | 6    | $F_1$ | 75        |

Table II (continued).

| $\tilde{\nu}_e/\text{cm}^{-1}$ | $\tilde{\nu}_c/\text{cm}^{-1}$ | $\tilde{\nu}_e - \tilde{\nu}_c/10^{-3}\text{cm}^{-1}$ | $I_e/\text{cm}^{-2}\text{atm}^{-1}$ | $I_c/\text{cm}^{-2}\text{atm}^{-1}$ | $I_e - I_c/\%$ | $J''$ | $C''$ | $\alpha''$ | $J'$ | $C'$  | $\alpha'$ |
|--------------------------------|--------------------------------|-------------------------------------------------------|-------------------------------------|-------------------------------------|----------------|-------|-------|------------|------|-------|-----------|
| 5580.017640                    | 5580.019450                    | -1.810                                                | $0.5421 \times 10^{-3}$             | $0.1161 \times 10^{-3}$             | 366.725        | 6     | $F_2$ | 1          | 6    | $F_1$ | 75        |
| 5580.800380                    | 5580.733394                    | 66.986                                                | $0.1570 \times 10^{-3}$             | $0.1361 \times 10^{-3}$             | 15.394         | 3     | $F_2$ | 1          | 3    | $F_1$ | 38        |
| 5580.984780                    | 5580.915266                    | 69.514                                                |                                     | $0.1601 \times 10^{-4}$             |                | 6     | $F_1$ | 1          | 6    | $F_2$ | 81        |
| 5581.764430                    | 5581.812277                    | -47.847                                               |                                     | $0.1138 \times 10^{-3}$             |                | 9     | $F_1$ | 1          | 9    | $F_2$ | 118       |
| 5582.051020                    | 5581.977673                    | 73.347                                                |                                     | $0.1466 \times 10^{-3}$             |                | 9     | $F_2$ | 1          | 9    | $F_1$ | 121       |
| 5582.141000                    | 5582.138641                    | 2.359                                                 |                                     | $0.2316 \times 10^{-4}$             |                | 5     | $F_1$ | 2          | 5    | $F_2$ | 63        |
| 5582.158771                    | 5582.153222                    | 5.549                                                 |                                     | $0.3671 \times 10^{-4}$             |                | 5     | $F_1$ | 1          | 5    | $F_2$ | 63        |
| 5582.565090                    | 5582.535077                    | 30.013                                                |                                     | $0.1277 \times 10^{-2}$             |                | 6     | $F_2$ | 2          | 6    | $F_1$ | 76        |
| 5582.586240                    | 5582.556794                    | 29.446                                                |                                     | $0.1836 \times 10^{-4}$             |                | 6     | $F_2$ | 1          | 6    | $F_1$ | 76        |
| 5582.885660                    | 5582.573700                    | 311.960                                               | $0.1855 \times 10^{-3}$             | $0.1543 \times 10^{-3}$             | 20.197         | 4     | $E$   | 1          | 4    | $E$   | 34        |
| 5582.699530                    | 5582.738365                    | -38.835                                               |                                     | $0.6602 \times 10^{-3}$             |                | 4     | $F_1$ | 1          | 4    | $F_2$ | 51        |
| 5583.071146                    | 5583.134436                    | -63.290                                               |                                     | $0.7696 \times 10^{-4}$             |                | 7     | $E$   | 1          | 7    | $E$   | 62        |
| 5583.490600                    | 5583.457130                    | 33.470                                                |                                     | $0.8439 \times 10^{-3}$             |                | 5     | $F_1$ | 2          | 5    | $F_2$ | 64        |
| 5583.505000                    | 5583.471710                    | 33.290                                                | $0.7584 \times 10^{-3}$             | $0.8104 \times 10^{-3}$             | -6.421         | 5     | $F_1$ | 1          | 5    | $F_2$ | 64        |
| 5584.150184                    | 5584.243727                    | -93.543                                               |                                     | $0.5353 \times 10^{-5}$             |                | 3     | $F_2$ | 1          | 3    | $F_1$ | 39        |
| 5584.673400                    | 5584.649164                    | 24.236                                                | $0.2275 \times 10^{-2}$             | $0.2659 \times 10^{-2}$             | -14.445        | 4     | $F_1$ | 1          | 4    | $F_2$ | 52        |
| 5584.865300                    | 5584.903913                    | -38.613                                               | $0.1783 \times 10^{-2}$             | $0.1876 \times 10^{-2}$             | -4.956         | 4     | $E$   | 1          | 4    | $E$   | 35        |
| 5584.946200                    | 5584.950231                    | -4.031                                                |                                     | $0.1134 \times 10^{-2}$             |                | 6     | $A_2$ | 1          | 6    | $A_1$ | 27        |
| 5585.031090                    | 5585.074951                    | -43.861                                               |                                     | $0.4614 \times 10^{-5}$             |                | 6     | $F_2$ | 2          | 6    | $F_1$ | 79        |
| 5585.374290                    | 5585.339836                    | 34.454                                                |                                     | $0.2361 \times 10^{-3}$             |                | 7     | $F_2$ | 1          | 7    | $F_1$ | 96        |
| 5585.485290                    | 5585.410587                    | 74.703                                                |                                     | $0.3146 \times 10^{-3}$             |                | 4     | $F_2$ | 1          | 3    | $F_1$ | 54        |
| 5585.667800                    | 5585.529793                    | 138.007                                               | $0.3596 \times 10^{-2}$             | $0.3128 \times 10^{-2}$             | 14.952         | 3     | $F_1$ | 1          | 3    | $F_2$ | 37        |
| 5585.747300                    | 5585.668494                    | 78.806                                                | $0.2789 \times 10^{-2}$             | $0.2699 \times 10^{-2}$             | 3.327          | 3     | $F_2$ | 1          | 3    | $F_1$ | 40        |
| 5585.852006                    | 5585.946085                    | -94.079                                               |                                     | $0.2098 \times 10^{-4}$             |                | 6     | $F_1$ | 1          | 6    | $F_2$ | 84        |
| 5586.085990                    | 5586.010565                    | 75.425                                                |                                     | $0.2084 \times 10^{-3}$             |                | 5     | $E$   | 1          | 5    | $E$   | 44        |
| 5586.040760                    | 5586.034724                    | 6.036                                                 |                                     | $0.3735 \times 10^{-4}$             |                | 5     | $F_2$ | 1          | 5    | $F_1$ | 68        |
| 5586.119600                    | 5586.160911                    | -41.311                                               | $0.5333 \times 10^{-2}$             | $0.5261 \times 10^{-2}$             | 1.366          | 3     | $A_2$ | 1          | 3    | $A_1$ | 11        |
| 5586.604600                    | 5586.553251                    | 51.349                                                | $0.1842 \times 10^{-2}$             | $0.1807 \times 10^{-2}$             | 1.936          | 2     | $E$   | 1          | 2    | $E$   | 18        |
| 5586.691000                    | 5586.668248                    | 22.752                                                | $0.2740 \times 10^{-2}$             | $0.2645 \times 10^{-2}$             | 3.597          | 2     | $F_2$ | 1          | 2    | $F_1$ | 25        |
| 5586.840000                    | 5586.867187                    | -27.187                                               | $0.8122 \times 10^{-3}$             | $0.1168 \times 10^{-2}$             | -30.447        | 4     | $F_2$ | 1          | 4    | $F_1$ | 52        |
| 5587.080460                    | 5586.992343                    | 88.117                                                |                                     | $0.6515 \times 10^{-4}$             |                | 5     | $E$   | 1          | 5    | $E$   | 45        |
| 5586.989000                    | 5587.016996                    | -27.996                                               |                                     | $0.2810 \times 10^{-5}$             |                | 6     | $F_2$ | 2          | 6    | $F_1$ | 80        |
| 5587.198200                    | 5587.188611                    | 9.589                                                 |                                     | $0.1791 \times 10^{-2}$             |                | 1     | $F_1$ | 1          | 1    | $F_2$ | 15        |
| 5587.264000                    | 5587.205578                    | 58.422                                                |                                     | $0.6445 \times 10^{-4}$             |                | 8     | $A_1$ | 1          | 7    | $A_2$ | 44        |
| 5587.487120                    | 5587.534694                    | -47.574                                               | $0.2997 \times 10^{-3}$             | $0.2092 \times 10^{-3}$             | 43.288         | 4     | $F_2$ | 1          | 4    | $F_1$ | 53        |
| 5587.747350                    | 5587.755082                    | -7.732                                                | $0.7102 \times 10^{-4}$             | $0.4052 \times 10^{-4}$             | 75.290         | 4     | $F_1$ | 1          | 4    | $F_2$ | 55        |
| 5588.015000                    | 5587.989183                    | 25.817                                                | $0.5348 \times 10^{-4}$             | $0.1676 \times 10^{-4}$             | 219.104        | 4     | $E$   | 1          | 4    | $E$   | 36        |
| 5588.306000                    | 5588.311466                    | -5.466                                                |                                     | $0.1641 \times 10^{-4}$             |                | 7     | $F_1$ | 2          | 6    | $F_2$ | 109       |
| 5588.361000                    | 5588.367156                    | -6.156                                                |                                     | $0.1880 \times 10^{-4}$             |                | 7     | $F_1$ | 1          | 6    | $F_2$ | 109       |
| 5588.810460                    | 5588.813140                    | -2.680                                                | $0.6688 \times 10^{-3}$             | $0.7388 \times 10^{-3}$             | -9.475         | 3     | $A_2$ | 1          | 2    | $A_1$ | 14        |
| 5591.292000                    | 5591.474247                    | -182.247                                              | $0.1238 \times 10^{-2}$             | $0.1363 \times 10^{-2}$             | -9.157         | 3     | $A_2$ | 1          | 3    | $A_1$ | 12        |
| 5593.122690                    | 5593.089986                    | 32.704                                                | $0.2065 \times 10^{-3}$             | $0.2008 \times 10^{-3}$             | 2.819          | 3     | $F_2$ | 1          | 2    | $F_1$ | 33        |
| 5594.353148                    | 5594.378180                    | -25.032                                               |                                     | $0.4152 \times 10^{-4}$             |                | 5     | $F_1$ | 2          | 4    | $F_2$ | 73        |
| 5594.993100                    | 5594.978017                    | 15.083                                                | $0.3726 \times 10^{-3}$             | $0.1806 \times 10^{-3}$             | 106.281        | 5     | $F_1$ | 2          | 4    | $F_2$ | 74        |
| 5594.960030                    | 5595.033526                    | -73.496                                               | $0.1066 \times 10^{-3}$             | $0.6740 \times 10^{-4}$             | 58.170         | 2     | $F_2$ | 1          | 2    | $F_1$ | 27        |
| 5595.556225                    | 5595.564465                    | -8.240                                                |                                     | $0.1032 \times 10^{-4}$             |                | 4     | $F_1$ | 1          | 4    | $F_2$ | 57        |
| 5596.291240                    | 5596.289767                    | 1.473                                                 |                                     | $0.7738 \times 10^{-6}$             |                | 4     | $F_2$ | 1          | 4    | $F_1$ | 54        |
| 5596.569380                    | 5596.538492                    | 30.888                                                | $0.8851 \times 10^{-4}$             | $0.7665 \times 10^{-4}$             | 15.468         | 7     | $F_2$ | 2          | 6    | $F_1$ | 109       |
| 5596.607119                    | 5596.576511                    | 30.608                                                |                                     | $0.2760 \times 10^{-4}$             |                | 7     | $F_2$ | 1          | 6    | $F_1$ | 109       |
| 5597.141000                    | 5597.144041                    | -3.041                                                | $0.3107 \times 10^{-2}$             | $0.3089 \times 10^{-2}$             | 0.575          | 0     | $A_1$ | 1          | 1    | $A_2$ | 7         |

Table II (continued).

| $\tilde{\nu}_e/\text{cm}^{-1}$ | $\tilde{\nu}_c/\text{cm}^{-1}$ | $\tilde{\nu}_e - \tilde{\nu}_c/10^{-3}\text{cm}^{-1}$ | $I_e/\text{cm}^{-2}\text{atm}^{-1}$ | $I_c/\text{cm}^{-2}\text{atm}^{-1}$ | $I_e - I_c/\%$ | $J''$ | $C''$                 | $\alpha''$ | $J'$ | $C'$                  | $\alpha'$ |
|--------------------------------|--------------------------------|-------------------------------------------------------|-------------------------------------|-------------------------------------|----------------|-------|-----------------------|------------|------|-----------------------|-----------|
| 5597.260000                    | 5597.311831                    | -51.831                                               |                                     | $0.4164 \times 10^{-4}$             |                | 7     | <i>E</i>              | 1          | 6    | <i>E</i>              | 76        |
| 5597.999150                    | 5598.034015                    | -34.865                                               | $0.1040 \times 10^{-3}$             | $0.1036 \times 10^{-3}$             | 0.338          | 5     | <i>F</i> <sub>2</sub> | 1          | 4    | <i>F</i> <sub>1</sub> | 70        |
| 5598.429030                    | 5598.442911                    | -13.881                                               |                                     | $0.1100 \times 10^{-3}$             |                | 3     | <i>F</i> <sub>2</sub> | 1          | 3    | <i>F</i> <sub>1</sub> | 44        |
| 5598.524468                    | 5598.457734                    | 66.734                                                |                                     | $0.5784 \times 10^{-5}$             |                | 5     | <i>F</i> <sub>2</sub> | 1          | 5    | <i>F</i> <sub>1</sub> | 73        |
| 5598.765950                    | 5598.787669                    | -21.719                                               |                                     | $0.3853 \times 10^{-5}$             |                | 6     | <i>F</i> <sub>2</sub> | 2          | 5    | <i>F</i> <sub>1</sub> | 96        |
| 5598.788300                    | 5598.809385                    | -21.085                                               |                                     | $0.4883 \times 10^{-5}$             |                | 6     | <i>F</i> <sub>2</sub> | 1          | 5    | <i>F</i> <sub>1</sub> | 96        |
| 5599.511865                    | 5599.470750                    | 41.115                                                |                                     | $0.2091 \times 10^{-4}$             |                | 6     | <i>F</i> <sub>2</sub> | 2          | 6    | <i>F</i> <sub>1</sub> | 83        |
| 5599.532741                    | 5599.492466                    | 40.275                                                |                                     | $0.7950 \times 10^{-4}$             |                | 6     | <i>F</i> <sub>2</sub> | 1          | 6    | <i>F</i> <sub>1</sub> | 83        |
| 5600.654387                    | 5600.686850                    | -32.463                                               |                                     | $0.7957 \times 10^{-6}$             |                | 5     | <i>F</i> <sub>2</sub> | 1          | 5    | <i>F</i> <sub>1</sub> | 74        |
| 5600.849310                    | 5600.861677                    | -12.367                                               |                                     | $0.9447 \times 10^{-4}$             |                | 7     | <i>F</i> <sub>2</sub> | 2          | 7    | <i>F</i> <sub>1</sub> | 103       |
| 5600.887130                    | 5600.899696                    | -12.566                                               |                                     | $0.4298 \times 10^{-3}$             |                | 7     | <i>F</i> <sub>2</sub> | 1          | 7    | <i>F</i> <sub>1</sub> | 103       |
| 5600.963788                    | 5600.932507                    | 31.281                                                |                                     | $0.3036 \times 10^{-3}$             |                | 4     | <i>F</i> <sub>2</sub> | 1          | 3    | <i>F</i> <sub>1</sub> | 57        |
| 5601.707131                    | 5601.715264                    | -8.133                                                |                                     | $0.3382 \times 10^{-4}$             |                | 4     | <i>F</i> <sub>1</sub> | 1          | 4    | <i>F</i> <sub>2</sub> | 59        |
| 5602.383089                    | 5602.161693                    | 221.396                                               | $0.1787 \times 10^{-3}$             | $0.1271 \times 10^{-3}$             | 40.624         | 5     | <i>F</i> <sub>1</sub> | 1          | 4    | <i>F</i> <sub>2</sub> | 77        |
| 5603.247270                    | 5603.257554                    | -10.284                                               |                                     | $0.5910 \times 10^{-5}$             |                | 4     | <i>F</i> <sub>1</sub> | 1          | 4    | <i>F</i> <sub>2</sub> | 60        |
| 5603.434000                    | 5603.399963                    | 34.037                                                |                                     | $0.5665 \times 10^{-4}$             |                | 5     | <i>F</i> <sub>1</sub> | 2          | 5    | <i>F</i> <sub>2</sub> | 72        |
| 5603.447960                    | 5603.414543                    | 33.417                                                | $0.4959 \times 10^{-3}$             | $0.4677 \times 10^{-3}$             | 6.034          | 5     | <i>F</i> <sub>1</sub> | 1          | 5    | <i>F</i> <sub>2</sub> | 72        |
| 5604.016530                    | 5604.011825                    | 4.705                                                 |                                     | $0.5378 \times 10^{-4}$             |                | 4     | <i>F</i> <sub>2</sub> | 1          | 3    | <i>F</i> <sub>1</sub> | 58        |
| 5604.393330                    | 5604.395558                    | -2.228                                                |                                     | $0.3011 \times 10^{-3}$             |                | 4     | <i>F</i> <sub>1</sub> | 1          | 4    | <i>F</i> <sub>2</sub> | 61        |
| 5604.455510                    | 5604.452672                    | 2.838                                                 |                                     | $0.1834 \times 10^{-3}$             |                | 3     | <i>F</i> <sub>2</sub> | 1          | 2    | <i>F</i> <sub>1</sub> | 36        |
| 5604.603714                    | 5604.634174                    | -30.460                                               |                                     | $0.2921 \times 10^{-4}$             |                | 6     | <i>F</i> <sub>2</sub> | 2          | 5    | <i>F</i> <sub>1</sub> | 99        |
| 5604.625400                    | 5604.655890                    | -30.490                                               | $0.2532 \times 10^{-3}$             | $0.2575 \times 10^{-3}$             | -1.659         | 6     | <i>F</i> <sub>2</sub> | 1          | 5    | <i>F</i> <sub>1</sub> | 99        |
| 5604.661000                    | 5604.726260                    | -65.260                                               |                                     | $0.4596 \times 10^{-6}$             |                | 5     | <i>F</i> <sub>2</sub> | 1          | 4    | <i>F</i> <sub>1</sub> | 73        |
| 5605.119060                    | 5605.115400                    | 3.660                                                 | $0.4220 \times 10^{-3}$             | $0.2633 \times 10^{-3}$             | 60.291         | 4     | <i>F</i> <sub>1</sub> | 1          | 4    | <i>F</i> <sub>2</sub> | 62        |
| 5605.714677                    | 5605.679547                    | 35.130                                                | $0.6155 \times 10^{-5}$             | $0.1020 \times 10^{-4}$             | -39.628        | 5     | <i>F</i> <sub>2</sub> | 1          | 6    | <i>F</i> <sub>1</sub> | 63        |
| 5605.873526                    | 5605.907094                    | -33.568                                               |                                     | $0.1680 \times 10^{-3}$             |                | 3     | <i>F</i> <sub>2</sub> | 1          | 3    | <i>F</i> <sub>1</sub> | 48        |
| 5606.203660                    | 5606.210372                    | -6.712                                                | $0.1974 \times 10^{-4}$             | $0.3050 \times 10^{-4}$             | -35.278        | 5     | <i>F</i> <sub>1</sub> | 2          | 6    | <i>F</i> <sub>2</sub> | 67        |
| 5606.390740                    | 5606.322952                    | 67.788                                                |                                     | $0.8386 \times 10^{-4}$             |                | 2     | <i>F</i> <sub>2</sub> | 1          | 2    | <i>F</i> <sub>1</sub> | 29        |
| 5606.340416                    | 5606.339961                    | 0.455                                                 |                                     | $0.7579 \times 10^{-5}$             |                | 6     | <i>E</i>              | 1          | 5    | <i>E</i>              | 63        |
| 5606.536041                    | 5606.497936                    | 38.105                                                | $0.2843 \times 10^{-2}$             | $0.2847 \times 10^{-2}$             | -0.136         | 1     | <i>F</i> <sub>1</sub> | 1          | 2    | <i>F</i> <sub>2</sub> | 28        |
| 5606.595000                    | 5606.573077                    | 21.923                                                |                                     | $0.5553 \times 10^{-4}$             |                | 5     | <i>F</i> <sub>1</sub> | 2          | 4    | <i>F</i> <sub>2</sub> | 79        |
| 5606.610480                    | 5606.587657                    | 22.823                                                | $0.1380 \times 10^{-3}$             | $0.1031 \times 10^{-3}$             | 33.910         | 5     | <i>F</i> <sub>1</sub> | 1          | 4    | <i>F</i> <sub>2</sub> | 79        |
| 5606.905800                    | 5606.924950                    | -19.150                                               |                                     | $0.6009 \times 10^{-5}$             |                | 6     | <i>A</i> <sub>1</sub> | 1          | 5    | <i>A</i> <sub>2</sub> | 34        |
| 5607.018474                    | 5606.976825                    | 41.649                                                |                                     | $0.2253 \times 10^{-5}$             |                | 4     | <i>F</i> <sub>2</sub> | 1          | 3    | <i>F</i> <sub>1</sub> | 59        |
| 5606.993428                    | 5606.977330                    | 16.098                                                |                                     | $0.1113 \times 10^{-4}$             |                | 4     | <i>E</i>              | 1          | 5    | <i>E</i>              | 37        |
| 5607.153410                    | 5607.138943                    | 14.467                                                | $0.3953 \times 10^{-3}$             | $0.3170 \times 10^{-3}$             | 24.695         | 5     | <i>F</i> <sub>2</sub> | 1          | 4    | <i>F</i> <sub>1</sub> | 75        |
| 5607.276520                    | 5607.356173                    | -79.653                                               | $0.2000 \times 10^{-3}$             | $0.1788 \times 10^{-3}$             | 11.839         | 3     | <i>F</i> <sub>1</sub> | 1          | 2    | <i>F</i> <sub>2</sub> | 41        |
| 5607.534000                    | 5607.512381                    | 21.619                                                |                                     | $0.1811 \times 10^{-5}$             |                | 3     | <i>F</i> <sub>1</sub> | 1          | 4    | <i>F</i> <sub>2</sub> | 47        |
| 5607.658274                    | 5607.652081                    | 6.193                                                 | $0.9754 \times 10^{-3}$             | $0.9162 \times 10^{-3}$             | 6.465          | 4     | <i>A</i> <sub>1</sub> | 1          | 3    | <i>A</i> <sub>2</sub> | 22        |
| 5608.792070                    | 5608.742212                    | 49.858                                                | $0.3393 \times 10^{-3}$             | $0.3291 \times 10^{-3}$             | 3.089          | 4     | <i>F</i> <sub>1</sub> | 1          | 3    | <i>F</i> <sub>2</sub> | 58        |
| 5608.829137                    | 5608.870358                    | -41.221                                               |                                     | $0.1698 \times 10^{-4}$             |                | 1     | <i>F</i> <sub>1</sub> | 1          | 2    | <i>F</i> <sub>2</sub> | 29        |
| 5609.001520                    | 5609.081700                    | -80.180                                               | $0.2926 \times 10^{-3}$             | $0.3027 \times 10^{-3}$             | -3.322         | 2     | <i>F</i> <sub>2</sub> | 1          | 1    | <i>F</i> <sub>1</sub> | 25        |
| 5609.182260                    | 5609.170522                    | 11.738                                                | $0.1873 \times 10^{-3}$             | $0.1974 \times 10^{-3}$             | -5.138         | 4     | <i>E</i>              | 1          | 3    | <i>E</i>              | 39        |
| 5609.396060                    | 5609.392095                    | 3.965                                                 | $0.1717 \times 10^{-4}$             | $0.1211 \times 10^{-4}$             | 41.811         | 4     | <i>F</i> <sub>1</sub> | 1          | 5    | <i>F</i> <sub>2</sub> | 54        |
| 5609.507740                    | 5609.495047                    | 12.693                                                | $0.3337 \times 10^{-4}$             | $0.3487 \times 10^{-4}$             | -4.313         | 4     | <i>F</i> <sub>2</sub> | 1          | 5    | <i>F</i> <sub>1</sub> | 58        |
| 5609.664670                    | 5609.688322                    | -23.652                                               |                                     | $0.3574 \times 10^{-4}$             |                | 3     | <i>F</i> <sub>1</sub> | 1          | 2    | <i>F</i> <sub>2</sub> | 42        |
| 5609.792790                    | 5609.774900                    | 17.890                                                |                                     | $0.1603 \times 10^{-4}$             |                | 3     | <i>F</i> <sub>2</sub> | 1          | 4    | <i>F</i> <sub>1</sub> | 46        |
| 5610.092000                    | 5610.059238                    | 32.762                                                |                                     | $0.1101 \times 10^{-4}$             |                | 1     | <i>F</i> <sub>1</sub> | 1          | 2    | <i>F</i> <sub>2</sub> | 30        |
| 5610.691090                    | 5610.521208                    | 169.882                                               | $0.2517 \times 10^{-3}$             | $0.2920 \times 10^{-3}$             | -13.792        | 3     | <i>F</i> <sub>2</sub> | 1          | 2    | <i>F</i> <sub>1</sub> | 38        |
| 5612.810560                    | 5612.796840                    | 13.720                                                |                                     | $0.1015 \times 10^{-4}$             |                | 2     | <i>E</i>              | 1          | 3    | <i>E</i>              | 25        |

Table II (continued).

| $\tilde{\nu}_e/\text{cm}^{-1}$ | $\tilde{\nu}_c/\text{cm}^{-1}$ | $\tilde{\nu}_e - \tilde{\nu}_c/10^{-3}\text{cm}^{-1}$ | $I_e/\text{cm}^{-2}\text{atm}^{-1}$ | $I_c/\text{cm}^{-2}\text{atm}^{-1}$ | $I_e - I_c/\%$ | $J''$ | $C''$ | $\alpha''$ | $J'$ | $C'$  | $\alpha'$ |
|--------------------------------|--------------------------------|-------------------------------------------------------|-------------------------------------|-------------------------------------|----------------|-------|-------|------------|------|-------|-----------|
| 5613.846190                    | 5613.852213                    | -6.023                                                | $0.1409 \times 10^{-4}$             | $0.1041 \times 10^{-5}$             | 1253.921       | 3     | $F_2$ | 1          | 4    | $F_1$ | 47        |
| 5613.945050                    | 5613.936504                    | 8.546                                                 |                                     | $0.2303 \times 10^{-4}$             |                | 3     | $F_1$ | 1          | 4    | $F_2$ | 49        |
| 5614.912920                    | 5614.930915                    | -17.995                                               |                                     | $0.5430 \times 10^{-4}$             |                | 5     | $F_2$ | 1          | 6    | $F_1$ | 66        |
| 5615.663467                    | 5615.594220                    | 69.247                                                |                                     | $0.2357 \times 10^{-2}$             |                | 2     | $E$   | 1          | 3    | $E$   | 26        |
| 5615.586571                    | 5615.678173                    | -91.602                                               | $0.3667 \times 10^{-2}$             | $0.3379 \times 10^{-2}$             | 8.514          | 2     | $F_2$ | 1          | 3    | $F_1$ | 39        |
| 5616.807400                    | 5616.861895                    | -54.495                                               | $0.3190 \times 10^{-3}$             | $0.3074 \times 10^{-3}$             | 3.762          | 1     | $F_1$ | 1          | 0    | $F_2$ | 9         |
| 5617.182405                    | 5617.102940                    | 79.465                                                |                                     | $0.3367 \times 10^{-7}$             |                | 2     | $F_2$ | 1          | 3    | $F_1$ | 40        |
| 5619.310400                    | 5619.296995                    | 13.405                                                |                                     | $0.8884 \times 10^{-7}$             |                | 2     | $E$   | 1          | 3    | $E$   | 27        |
| 5619.882530                    | 5619.883077                    | -0.547                                                | $0.1032 \times 10^{-3}$             | $0.9501 \times 10^{-4}$             | 8.615          | 3     | $F_2$ | 1          | 3    | $F_1$ | 50        |
| 5620.907550                    | 5620.885181                    | 22.369                                                |                                     | $0.4045 \times 10^{-4}$             |                | 3     | $F_2$ | 1          | 3    | $F_1$ | 51        |
| 5624.558810                    | 5624.524432                    | 34.378                                                |                                     | $0.3349 \times 10^{-3}$             |                | 2     | $F_2$ | 1          | 2    | $F_1$ | 33        |
| 5624.596705                    | 5624.637279                    | -40.574                                               |                                     | $0.1169 \times 10^{-3}$             |                | 3     | $F_1$ | 1          | 4    | $F_2$ | 51        |
| 5624.728482                    | 5624.800426                    | -71.944                                               |                                     | $0.2589 \times 10^{-4}$             |                | 4     | $F_1$ | 1          | 5    | $F_2$ | 57        |
| 5626.568630                    | 5626.548078                    | 20.552                                                |                                     | $0.4765 \times 10^{-5}$             |                | 3     | $F_1$ | 1          | 4    | $F_2$ | 52        |
| 5627.386900                    | 5627.313746                    | 73.154                                                |                                     | $0.2158 \times 10^{-3}$             |                | 3     | $F_2$ | 1          | 3    | $F_1$ | 54        |
| 5628.434351                    | 5628.403504                    | 30.847                                                | $0.5008 \times 10^{-3}$             | $0.5399 \times 10^{-3}$             | -7.234         | 4     | $F_1$ | 1          | 4    | $F_2$ | 68        |
| 5628.602675                    | 5628.639449                    | -36.774                                               |                                     | $0.3420 \times 10^{-4}$             |                | 3     | $F_1$ | 1          | 4    | $F_2$ | 54        |
| 5629.392000                    | 5629.437852                    | -45.852                                               |                                     | $0.3309 \times 10^{-4}$             |                | 3     | $F_2$ | 1          | 4    | $F_1$ | 53        |
| 5629.644867                    | 5629.653997                    | -9.130                                                |                                     | $0.1203 \times 10^{-5}$             |                | 3     | $F_1$ | 1          | 4    | $F_2$ | 55        |
| 5629.762150                    | 5629.784709                    | -22.559                                               |                                     | $0.1365 \times 10^{-5}$             |                | 5     | $F_2$ | 1          | 6    | $F_1$ | 67        |
| 5629.861668                    | 5629.877357                    | -15.689                                               |                                     | $0.3193 \times 10^{-5}$             |                | 2     | $F_2$ | 1          | 3    | $F_1$ | 44        |
| 5630.022000                    | 5630.034212                    | -12.212                                               |                                     | $0.4461 \times 10^{-6}$             |                | 5     | $E$   | 1          | 6    | $E$   | 47        |
| 5630.180000                    | 5630.212927                    | -32.927                                               | $0.2892 \times 10^{-3}$             | $0.2174 \times 10^{-3}$             | 33.034         | 4     | $E$   | 1          | 4    | $E$   | 46        |
| 5630.453360                    | 5630.519897                    | -66.537                                               |                                     | $0.8432 \times 10^{-4}$             |                | 4     | $F_2$ | 1          | 5    | $F_1$ | 64        |
| 5630.641530                    | 5630.644298                    | -2.768                                                |                                     | $0.2280 \times 10^{-4}$             |                | 4     | $F_1$ | 1          | 4    | $F_2$ | 70        |
| 5630.884492                    | 5630.861685                    | 22.807                                                |                                     | $0.7857 \times 10^{-3}$             |                | 1     | $F_1$ | 1          | 1    | $F_2$ | 20        |
| 5632.094888                    | 5632.092552                    | 2.336                                                 |                                     | $0.3363 \times 10^{-3}$             |                | 6     | $E$   | 1          | 6    | $E$   | 67        |
| 5632.562010                    | 5632.586928                    | -24.918                                               |                                     | $0.5894 \times 10^{-3}$             |                | 6     | $F_2$ | 1          | 6    | $F_1$ | 97        |
| 5633.093000                    | 5633.031663                    | 61.337                                                |                                     | $0.3206 \times 10^{-3}$             |                | 5     | $F_2$ | 1          | 6    | $F_1$ | 69        |
| 5634.508240                    | 5634.502843                    | 5.397                                                 |                                     | $0.1226 \times 10^{-2}$             |                | 4     | $F_1$ | 1          | 5    | $F_2$ | 63        |
| 5635.086013                    | 5635.059550                    | 26.463                                                |                                     | $0.6510 \times 10^{-5}$             |                | 6     | $F_2$ | 1          | 6    | $F_1$ | 98        |
| 5635.854900                    | 5635.821331                    | 33.569                                                |                                     | $0.4474 \times 10^{-3}$             |                | 4     | $F_1$ | 1          | 5    | $F_2$ | 64        |
| 5635.890180                    | 5635.887118                    | 3.062                                                 | $0.3530 \times 10^{-4}$             | $0.5520 \times 10^{-4}$             | -36.054        | 2     | $F_2$ | 1          | 2    | $F_1$ | 36        |
| 5636.447005                    | 5636.438578                    | 8.427                                                 |                                     | $0.2218 \times 10^{-4}$             |                | 6     | $F_1$ | 1          | 6    | $F_2$ | 103       |
| 5636.382270                    | 5636.441359                    | -59.089                                               |                                     | $0.2623 \times 10^{-3}$             |                | 6     | $E$   | 1          | 7    | $E$   | 56        |
| 5637.308111                    | 5637.341540                    | -33.429                                               |                                     | $0.4351 \times 10^{-5}$             |                | 2     | $F_2$ | 1          | 3    | $F_1$ | 48        |
| 5637.455000                    | 5637.463379                    | -8.379                                                | $0.7339 \times 10^{-5}$             | $0.7318 \times 10^{-5}$             | 0.281          | 3     | $F_1$ | 1          | 4    | $F_2$ | 57        |
| 5638.193310                    | 5638.192926                    | 0.384                                                 | $0.1863 \times 10^{-4}$             | $0.8166 \times 10^{-7}$             | 22713.749      | 3     | $F_2$ | 1          | 4    | $F_1$ | 54        |
| 5638.445990                    | 5638.371714                    | 74.276                                                |                                     | $0.2010 \times 10^{-4}$             |                | 4     | $E$   | 1          | 5    | $E$   | 44        |
| 5638.386935                    | 5638.382627                    | 4.308                                                 |                                     | $0.2945 \times 10^{-4}$             |                | 4     | $F_2$ | 1          | 5    | $F_1$ | 68        |
| 5642.427050                    | 5642.427567                    | -0.517                                                |                                     | $0.1492 \times 10^{-2}$             |                | 5     | $E$   | 1          | 6    | $E$   | 52        |
| 5642.804573                    | 5642.806559                    | -1.986                                                | $0.8301 \times 10^{-3}$             | $0.3481 \times 10^{-2}$             | -76.152        | 5     | $F_2$ | 1          | 6    | $F_1$ | 75        |
| 5642.868424                    | 5642.835666                    | 32.758                                                |                                     | $0.7665 \times 10^{-4}$             |                | 3     | $F_2$ | 1          | 3    | $F_1$ | 57        |
| 5643.152330                    | 5643.228411                    | -76.081                                               | $0.1908 \times 10^{-2}$             | $0.1674 \times 10^{-2}$             | 14.002         | 0     | $A_1$ | 1          | 1    | $A_2$ | 9         |
| 5643.607530                    | 5643.614178                    | -6.648                                                |                                     | $0.3853 \times 10^{-5}$             |                | 3     | $F_1$ | 1          | 4    | $F_2$ | 59        |
| 5643.786000                    | 5643.717595                    | 68.405                                                |                                     | $0.2858 \times 10^{-4}$             |                | 5     | $F_1$ | 2          | 6    | $F_2$ | 81        |
| 5643.800113                    | 5643.732175                    | 67.938                                                |                                     | $0.8951 \times 10^{-3}$             |                | 5     | $F_1$ | 1          | 6    | $F_2$ | 81        |
| 5645.146490                    | 5645.156468                    | -9.978                                                |                                     | $0.1693 \times 10^{-3}$             |                | 3     | $F_1$ | 1          | 4    | $F_2$ | 60        |
| 5645.373120                    | 5645.343902                    | 29.218                                                |                                     | $0.2377 \times 10^{-4}$             |                | 5     | $F_2$ | 1          | 6    | $F_1$ | 76        |
| 5645.918330                    | 5645.914984                    | 3.346                                                 |                                     | $0.2056 \times 10^{-3}$             |                | 3     | $F_2$ | 1          | 3    | $F_1$ | 58        |

Table II (continued).

| $\tilde{\nu}_e/\text{cm}^{-1}$ | $\tilde{\nu}_c/\text{cm}^{-1}$ | $\tilde{\nu}_e - \tilde{\nu}_c/10^{-3}\text{cm}^{-1}$ | $I_e/\text{cm}^{-2}\text{atm}^{-1}$ | $I_c/\text{cm}^{-2}\text{atm}^{-1}$ | $I_e - I_c/\%$ | $J''$ | $C''$ | $\alpha''$ | $J'$ | $C'$  | $\alpha'$ |
|--------------------------------|--------------------------------|-------------------------------------------------------|-------------------------------------|-------------------------------------|----------------|-------|-------|------------|------|-------|-----------|
| 5646.293520                    | 5646.294473                    | -0.953                                                |                                     | $0.7088 \times 10^{-4}$             |                | 3     | $F_1$ | 1          | 4    | $F_2$ | 61        |
| 5646.719640                    | 5646.742382                    | -22.742                                               | $0.1349 \times 10^{-3}$             | $0.1767 \times 10^{-3}$             | -23.669        | 4     | $F_1$ | 1          | 4    | $F_2$ | 73        |
| 5647.017670                    | 5647.014314                    | 3.356                                                 |                                     | $0.6643 \times 10^{-5}$             |                | 3     | $F_1$ | 1          | 4    | $F_2$ | 62        |
| 5647.356000                    | 5647.342219                    | 13.781                                                |                                     | $0.1099 \times 10^{-4}$             |                | 4     | $F_1$ | 1          | 4    | $F_2$ | 74        |
| 5648.671000                    | 5648.762994                    | -91.994                                               |                                     | $0.3109 \times 10^{-4}$             |                | 5     | $F_1$ | 1          | 6    | $F_2$ | 84        |
| 5648.921523                    | 5648.879983                    | 41.540                                                |                                     | $0.5668 \times 10^{-5}$             |                | 3     | $F_2$ | 1          | 3    | $F_1$ | 59        |
| 5650.347280                    | 5650.381918                    | -34.638                                               | $0.7068 \times 10^{-4}$             | $0.4389 \times 10^{-4}$             | 61.035         | 4     | $F_2$ | 1          | 4    | $F_1$ | 70        |
| 5650.874110                    | 5650.805637                    | 68.473                                                | $0.4249 \times 10^{-4}$             | $0.3983 \times 10^{-4}$             | 6.686          | 4     | $F_2$ | 1          | 5    | $F_1$ | 73        |
| 5651.317150                    | 5651.317522                    | -0.372                                                | $0.2137 \times 10^{-3}$             | $0.1687 \times 10^{-3}$             | 26.707         | 2     | $F_2$ | 1          | 3    | $F_1$ | 50        |
| 5652.141040                    | 5652.088762                    | 52.278                                                | $0.3408 \times 10^{-3}$             | $0.4160 \times 10^{-3}$             | -18.082        | 4     | $F_2$ | 1          | 4    | $F_1$ | 71        |
| 5652.341970                    | 5652.319627                    | 22.343                                                |                                     | $0.8653 \times 10^{-5}$             |                | 2     | $F_2$ | 1          | 3    | $F_1$ | 51        |
| 5652.587380                    | 5652.594829                    | -7.449                                                | $0.6945 \times 10^{-3}$             | $0.1791 \times 10^{-2}$             | -61.231        | 6     | $A_2$ | 1          | 7    | $A_1$ | 29        |
| 5652.998266                    | 5653.034753                    | -36.487                                               |                                     | $0.8623 \times 10^{-5}$             |                | 4     | $F_2$ | 1          | 5    | $F_1$ | 74        |
| 5653.102920                    | 5653.110213                    | -7.293                                                |                                     | $0.9799 \times 10^{-3}$             |                | 6     | $F_2$ | 2          | 7    | $F_1$ | 93        |
| 5653.124440                    | 5653.131929                    | -7.489                                                |                                     | $0.2077 \times 10^{-3}$             |                | 6     | $F_2$ | 1          | 7    | $F_1$ | 93        |
| 5654.732530                    | 5654.511314                    | 221.216                                               | $0.1434 \times 10^{-3}$             | $0.1147 \times 10^{-3}$             | 25.001         | 4     | $F_1$ | 1          | 4    | $F_2$ | 77        |
| 5655.729000                    | 5655.713514                    | 15.486                                                |                                     | $0.2778 \times 10^{-4}$             |                | 6     | $E$   | 1          | 7    | $E$   | 61        |
| 5655.799000                    | 5655.764164                    | 34.836                                                |                                     | $0.1531 \times 10^{-3}$             |                | 4     | $F_1$ | 1          | 5    | $F_2$ | 72        |
| 5656.328899                    | 5656.391091                    | -62.192                                               | $0.2055 \times 10^{-4}$             | $0.1371 \times 10^{-3}$             | -85.006        | 6     | $E$   | 1          | 7    | $E$   | 62        |
| 5657.008400                    | 5657.074163                    | -65.763                                               |                                     | $0.2229 \times 10^{-3}$             |                | 4     | $F_2$ | 1          | 4    | $F_1$ | 73        |
| 5658.584000                    | 5658.551321                    | 32.679                                                |                                     | $0.2821 \times 10^{-4}$             |                | 6     | $F_2$ | 1          | 7    | $F_1$ | 96        |
| 5658.962430                    | 5658.937278                    | 25.152                                                | $0.3479 \times 10^{-4}$             | $0.4031 \times 10^{-4}$             | -13.685        | 4     | $F_1$ | 1          | 4    | $F_2$ | 79        |
| 5659.669567                    | 5659.750289                    | -80.722                                               |                                     | $0.2734 \times 10^{-4}$             |                | 1     | $F_1$ | 1          | 2    | $F_2$ | 41        |
| 5661.543000                    | 5661.548867                    | -5.867                                                |                                     | $0.1193 \times 10^{-3}$             |                | 6     | $F_1$ | 1          | 6    | $F_2$ | 109       |
| 5661.570000                    | 5661.596493                    | -26.493                                               |                                     | $0.2922 \times 10^{-5}$             |                | 5     | $F_2$ | 1          | 5    | $F_1$ | 96        |
| 5662.058793                    | 5662.082438                    | -23.645                                               | $0.8734 \times 10^{-3}$             | $0.8809 \times 10^{-3}$             | -0.848         | 1     | $F_1$ | 1          | 2    | $F_2$ | 42        |
| 5662.210000                    | 5662.272262                    | -62.262                                               |                                     | $0.7825 \times 10^{-4}$             |                | 7     | $F_2$ | 2          | 8    | $F_1$ | 103       |
| 5662.328529                    | 5662.321315                    | 7.214                                                 |                                     | $0.1400 \times 10^{-3}$             |                | 7     | $E$   | 1          | 8    | $E$   | 70        |
| 5665.891829                    | 5665.896905                    | -5.076                                                |                                     | $0.2855 \times 10^{-4}$             |                | 5     | $F_1$ | 2          | 5    | $F_2$ | 93        |
| 5665.905713                    | 5665.911485                    | -5.772                                                |                                     | $0.9089 \times 10^{-5}$             |                | 5     | $F_1$ | 1          | 5    | $F_2$ | 93        |
| 5667.239658                    | 5667.186216                    | 53.442                                                |                                     | $0.1521 \times 10^{-2}$             |                | 9     | $A_2$ | 1          | 10   | $A_1$ | 42        |
| 5667.413255                    | 5667.442999                    | -29.744                                               |                                     | $0.8679 \times 10^{-5}$             |                | 5     | $F_2$ | 1          | 5    | $F_1$ | 99        |
| 5669.088699                    | 5669.075769                    | 12.930                                                |                                     | $0.4443 \times 10^{-4}$             |                | 8     | $A_1$ | 1          | 9    | $A_2$ | 39        |
| 5669.114757                    | 5669.116217                    | -1.460                                                |                                     | $0.3058 \times 10^{-4}$             |                | 5     | $E$   | 1          | 5    | $E$   | 63        |
| 5669.114884                    | 5669.167700                    | -52.816                                               |                                     | $0.1228 \times 10^{-2}$             |                | 9     | $A_1$ | 1          | 10   | $A_2$ | 41        |
| 5669.176144                    | 5669.181594                    | -5.450                                                |                                     | $0.1649 \times 10^{-4}$             |                | 6     | $F_1$ | 1          | 6    | $F_2$ | 113       |
| 5669.329866                    | 5669.340383                    | -10.517                                               |                                     | $0.2039 \times 10^{-4}$             |                | 5     | $F_1$ | 2          | 5    | $F_2$ | 94        |
| 5669.343000                    | 5669.354963                    | -11.963                                               |                                     | $0.6783 \times 10^{-5}$             |                | 5     | $F_1$ | 1          | 5    | $F_2$ | 94        |
| 5669.521000                    | 5669.530020                    | -9.020                                                |                                     | $0.6650 \times 10^{-5}$             |                | 6     | $E$   | 1          | 6    | $E$   | 75        |
| 5669.819750                    | 5669.787995                    | 31.755                                                | $0.5693 \times 10^{-4}$             | $0.5964 \times 10^{-4}$             | -4.544         | 6     | $F_2$ | 1          | 6    | $F_1$ | 109       |
| 5670.334850                    | 5670.302418                    | 32.432                                                |                                     | $0.8488 \times 10^{-4}$             |                | 3     | $F_1$ | 1          | 4    | $F_2$ | 68        |
| 5670.517440                    | 5670.568486                    | -51.046                                               | $0.4010 \times 10^{-4}$             | $0.3406 \times 10^{-4}$             | 17.741         | 6     | $E$   | 1          | 6    | $E$   | 76        |
| 5672.540380                    | 5672.543212                    | -2.832                                                | $0.2020 \times 10^{-3}$             | $0.1720 \times 10^{-3}$             | 17.452         | 3     | $F_1$ | 1          | 4    | $F_2$ | 70        |
| 5674.098576                    | 5674.111181                    | -12.605                                               |                                     | $0.5259 \times 10^{-4}$             |                | 6     | $F_2$ | 1          | 7    | $F_1$ | 103       |
| 5674.300524                    | 5674.270111                    | 30.413                                                |                                     | $0.1666 \times 10^{-3}$             |                | 2     | $F_2$ | 1          | 3    | $F_1$ | 57        |
| 5675.595920                    | 5675.594784                    | 1.136                                                 | $0.3197 \times 10^{-4}$             | $0.4150 \times 10^{-4}$             | -22.966        | 7     | $F_1$ | 2          | 7    | $F_2$ | 127       |
| 5677.340151                    | 5677.337939                    | 2.212                                                 |                                     | $0.5295 \times 10^{-4}$             |                | 6     | $F_2$ | 2          | 6    | $F_1$ | 111       |
| 5677.353000                    | 5677.349430                    | 3.570                                                 |                                     | $0.8283 \times 10^{-5}$             |                | 2     | $F_2$ | 1          | 3    | $F_1$ | 58        |
| 5677.362000                    | 5677.359655                    | 2.345                                                 |                                     | $0.6295 \times 10^{-5}$             |                | 6     | $F_2$ | 1          | 6    | $F_1$ | 111       |
| 5677.521330                    | 5677.495709                    | 25.621                                                | $0.2324 \times 10^{-4}$             | $0.1792 \times 10^{-4}$             | 29.707         | 7     | $F_2$ | 2          | 7    | $F_1$ | 132       |

Table II (continued).

| $\tilde{\nu}_e/\text{cm}^{-1}$ | $\tilde{\nu}_c/\text{cm}^{-1}$ | $\tilde{\nu}_e - \tilde{\nu}_c/10^{-3}\text{cm}^{-1}$ | $I_e/\text{cm}^{-2}\text{atm}^{-1}$ | $I_c/\text{cm}^{-2}\text{atm}^{-1}$ | $I_e - I_c/\%$ | $J''$ | $C''$ | $\alpha''$ | $J'$ | $C'$  | $\alpha'$ |
|--------------------------------|--------------------------------|-------------------------------------------------------|-------------------------------------|-------------------------------------|----------------|-------|-------|------------|------|-------|-----------|
| 5677.559850                    | 5677.533728                    | 26.122                                                | $0.9901 \times 10^{-5}$             | $0.1045 \times 10^{-4}$             | -5.214         | 7     | $F_2$ | 1          | 7    | $F_1$ | 132       |
| 5680.356370                    | 5680.314429                    | 41.941                                                |                                     | $0.3019 \times 10^{-3}$             |                | 2     | $F_2$ | 1          | 3    | $F_1$ | 59        |
| 5682.515590                    | 5682.504414                    | 11.176                                                | $0.1855 \times 10^{-3}$             | $0.2262 \times 10^{-3}$             | -17.976        | 2     | $E$   | 1          | 3    | $E$   | 39        |
| 5686.030120                    | 5686.039177                    | -9.057                                                | $0.1165 \times 10^{-3}$             | $0.3823 \times 10^{-4}$             | 204.745        | 7     | $A_2$ | 1          | 7    | $A_1$ | 42        |
| 5686.253900                    | 5686.228626                    | 25.274                                                |                                     | $0.9202 \times 10^{-5}$             |                | 7     | $F_2$ | 2          | 7    | $F_1$ | 136       |
| 5687.531400                    | 5687.519040                    | 12.360                                                |                                     | $0.6380 \times 10^{-6}$             |                | 13    | $F_2$ | 3          | 12   | $F_1$ | 284       |
| 5687.858780                    | 5687.840258                    | 18.522                                                |                                     | $0.6589 \times 10^{-4}$             |                | 10    | $A_1$ | 1          | 9    | $A_2$ | 70        |
| 5688.435180                    | 5688.460190                    | -25.010                                               | $0.8697 \times 10^{-4}$             | $0.8180 \times 10^{-4}$             | 6.316          | 9     | $F_1$ | 3          | 8    | $F_2$ | 180       |
| 5688.715190                    | 5688.713354                    | 1.836                                                 | $0.2157 \times 10^{-3}$             | $0.2031 \times 10^{-3}$             | 6.185          | 9     | $A_1$ | 1          | 8    | $A_2$ | 58        |
| 5689.254625                    | 5689.241133                    | 13.492                                                |                                     | $0.3082 \times 10^{-6}$             |                | 3     | $F_1$ | 1          | 4    | $F_2$ | 74        |
| 5692.249920                    | 5692.285077                    | -35.157                                               |                                     | $0.2390 \times 10^{-4}$             |                | 3     | $F_2$ | 1          | 4    | $F_1$ | 70        |
| 5694.044260                    | 5693.991920                    | 52.340                                                |                                     | $0.1112 \times 10^{-3}$             |                | 3     | $F_2$ | 1          | 4    | $F_1$ | 71        |
| 5694.871180                    | 5694.868807                    | 2.373                                                 |                                     | $0.4104 \times 10^{-4}$             |                | 5     | $E$   | 1          | 6    | $E$   | 67        |
| 5695.349710                    | 5695.374037                    | -24.327                                               |                                     | $0.5718 \times 10^{-4}$             |                | 5     | $F_2$ | 1          | 6    | $F_1$ | 97        |
| 5696.632330                    | 5696.410228                    | 222.102                                               | $0.3870 \times 10^{-4}$             | $0.3997 \times 10^{-4}$             | -3.166         | 3     | $F_1$ | 1          | 4    | $F_2$ | 77        |
| 5696.205832                    | 5696.417883                    | -212.051                                              | $0.1510 \times 10^{-2}$             | $0.1729 \times 10^{-2}$             | -12.679        | 3     | $A_2$ | 1          | 4    | $A_1$ | 27        |
| 5697.386730                    | 5697.390846                    | -4.116                                                | $0.8032 \times 10^{-4}$             | $0.1058 \times 10^{-3}$             | -24.079        | 12    | $F_2$ | 2          | 11   | $F_1$ | 267       |
| 5698.912500                    | 5698.977321                    | -64.821                                               |                                     | $0.5139 \times 10^{-3}$             |                | 3     | $F_2$ | 1          | 4    | $F_1$ | 73        |
| 5699.248360                    | 5699.240907                    | 7.453                                                 |                                     | $0.2430 \times 10^{-4}$             |                | 5     | $F_1$ | 2          | 6    | $F_2$ | 103       |
| 5699.261690                    | 5699.255488                    | 6.202                                                 | $0.8372 \times 10^{-4}$             | $0.8316 \times 10^{-4}$             | 0.672          | 5     | $F_1$ | 1          | 6    | $F_2$ | 103       |
| 5700.860501                    | 5700.836192                    | 24.309                                                |                                     | $0.8699 \times 10^{-3}$             |                | 3     | $F_1$ | 1          | 4    | $F_2$ | 79        |
| 5701.497092                    | 5701.277817                    | 219.275                                               | $0.4472 \times 10^{-3}$             | $0.5596 \times 10^{-3}$             | -20.093        | 10    | $E$   | 1          | 9    | $E$   | 141       |
| 5701.404729                    | 5701.390004                    | 14.725                                                |                                     | $0.5523 \times 10^{-4}$             |                | 3     | $F_2$ | 1          | 4    | $F_1$ | 75        |
| 5701.565590                    | 5701.390703                    | 174.887                                               | $0.7694 \times 10^{-3}$             | $0.8415 \times 10^{-3}$             | -8.570         | 10    | $F_2$ | 1          | 9    | $F_1$ | 217       |
| 5701.719177                    | 5701.632941                    | 86.236                                                | $0.1225 \times 10^{-2}$             | $0.1408 \times 10^{-2}$             | -13.019        | 10    | $A_2$ | 1          | 9    | $A_1$ | 69        |
| 5701.798244                    | 5701.807580                    | -9.336                                                |                                     | $0.4332 \times 10^{-4}$             |                | 12    | $F_1$ | 3          | 11   | $F_2$ | 264       |
| 5702.283400                    | 5702.291193                    | -7.793                                                |                                     | $0.2696 \times 10^{-4}$             |                | 12    | $F_1$ | 1          | 11   | $F_2$ | 264       |
| 5702.417000                    | 5702.428882                    | -11.882                                               | $0.3670 \times 10^{-4}$             | $0.4816 \times 10^{-4}$             | -23.800        | 9     | $F_1$ | 3          | 8    | $F_2$ | 188       |
| 5702.467370                    | 5702.478602                    | -11.232                                               | $0.3281 \times 10^{-4}$             | $0.3062 \times 10^{-4}$             | 7.151          | 9     | $F_1$ | 2          | 8    | $F_2$ | 188       |
| 5704.202259                    | 5704.168363                    | 33.896                                                |                                     | $0.1230 \times 10^{-3}$             |                | 8     | $F_2$ | 2          | 7    | $F_1$ | 162       |
| 5704.420890                    | 5704.357478                    | 63.412                                                |                                     | $0.1506 \times 10^{-3}$             |                | 8     | $F_1$ | 2          | 7    | $F_2$ | 158       |
| 5705.405410                    | 5705.406404                    | -0.994                                                | $0.1290 \times 10^{-3}$             | $0.8090 \times 10^{-4}$             | 59.448         | 8     | $F_2$ | 1          | 7    | $F_1$ | 163       |
| 5709.198821                    | 5709.205569                    | -6.748                                                | $0.2752 \times 10^{-4}$             | $0.2435 \times 10^{-4}$             | 13.042         | 11    | $F_1$ | 3          | 10   | $F_2$ | 243       |
| 5709.291600                    | 5709.298111                    | -6.511                                                | $0.6625 \times 10^{-4}$             | $0.9795 \times 10^{-4}$             | -32.362        | 11    | $F_1$ | 2          | 10   | $F_2$ | 243       |
| 5709.881200                    | 5709.910242                    | -29.042                                               |                                     | $0.9091 \times 10^{-4}$             |                | 11    | $E$   | 2          | 10   | $E$   | 163       |
| 5710.340212                    | 5710.290187                    | 50.025                                                | $0.1169 \times 10^{-3}$             | $0.1077 \times 10^{-3}$             | 8.581          | 11    | $F_1$ | 3          | 10   | $F_2$ | 244       |
| 5710.466759                    | 5710.468952                    | -2.193                                                |                                     | $0.7466 \times 10^{-4}$             |                | 11    | $F_1$ | 3          | 10   | $F_2$ | 245       |
| 5711.456194                    | 5711.473066                    | -16.872                                               |                                     | $0.2520 \times 10^{-4}$             |                | 8     | $F_1$ | 1          | 7    | $F_2$ | 161       |
| 5712.349282                    | 5712.339472                    | 9.810                                                 |                                     | $0.7660 \times 10^{-3}$             |                | 10    | $F_1$ | 1          | 9    | $F_2$ | 213       |
| 5712.944000                    | 5712.930799                    | 13.201                                                |                                     | $0.4811 \times 10^{-5}$             |                | 8     | $F_2$ | 1          | 7    | $F_1$ | 166       |
| 5713.081460                    | 5713.072991                    | 8.469                                                 |                                     | $0.1136 \times 10^{-4}$             |                | 11    | $F_2$ | 2          | 10   | $F_1$ | 239       |
| 5713.369350                    | 5713.384656                    | -15.306                                               |                                     | $0.1542 \times 10^{-3}$             |                | 8     | $A_1$ | 1          | 7    | $A_2$ | 57        |
| 5713.922786                    | 5713.944396                    | -21.610                                               |                                     | $0.8751 \times 10^{-3}$             |                | 4     | $F_2$ | 1          | 5    | $F_1$ | 96        |
| 5714.295811                    | 5714.276268                    | 19.543                                                |                                     | $0.1278 \times 10^{-2}$             |                | 9     | $F_1$ | 1          | 8    | $F_2$ | 192       |
| 5714.334132                    | 5714.333023                    | 1.109                                                 |                                     | $0.1170 \times 10^{-2}$             |                | 10    | $A_1$ | 1          | 9    | $A_2$ | 74        |
| 5714.647308                    | 5714.649552                    | -2.244                                                |                                     | $0.1269 \times 10^{-2}$             |                | 9     | $F_2$ | 1          | 8    | $F_1$ | 188       |
| 5714.727646                    | 5714.710238                    | 17.408                                                |                                     | $0.9199 \times 10^{-4}$             |                | 11    | $A_2$ | 1          | 10   | $A_1$ | 84        |
| 5716.328577                    | 5716.300746                    | 27.831                                                |                                     | $0.1087 \times 10^{-3}$             |                | 4     | $F_2$ | 1          | 5    | $F_1$ | 97        |
| 5716.554410                    | 5716.521260                    | 33.150                                                |                                     | $0.1292 \times 10^{-3}$             |                | 8     | $F_2$ | 2          | 7    | $F_1$ | 167       |
| 5717.047922                    | 5717.099635                    | -51.713                                               |                                     | $0.6169 \times 10^{-3}$             |                | 10    | $F_1$ | 2          | 9    | $F_2$ | 214       |



Table II (continued).

| $\tilde{\nu}_e/\text{cm}^{-1}$ | $\tilde{\nu}_c/\text{cm}^{-1}$ | $\tilde{\nu}_e - \tilde{\nu}_c/10^{-3}\text{cm}^{-1}$ | $I_e/\text{cm}^{-2}\text{atm}^{-1}$ | $I_c/\text{cm}^{-2}\text{atm}^{-1}$ | $I_e - I_c/\%$ | $J''$ | $C''$ | $\alpha''$ | $J'$ | $C'$  | $\alpha'$ |     |
|--------------------------------|--------------------------------|-------------------------------------------------------|-------------------------------------|-------------------------------------|----------------|-------|-------|------------|------|-------|-----------|-----|
| 5717.112346                    | 5717.123411                    | -11.065                                               |                                     | $0.1330 \times 10^{-3}$             |                |       | 8     | $F_2$      | 1    | 7     | $F_1$     | 168 |
| 5717.514972                    | 5717.577766                    | -62.794                                               |                                     | $0.3671 \times 10^{-3}$             |                |       | 10    | $E$        | 2    | 9     | $E$       | 143 |
| 5718.422316                    | 5718.502905                    | -80.589                                               |                                     | $0.4965 \times 10^{-3}$             |                |       | 10    | $F_2$      | 3    | 9     | $F_1$     | 220 |
| 5719.148850                    | 5719.172385                    | -23.535                                               | $0.1515 \times 10^{-3}$             | $0.1551 \times 10^{-3}$             | -2.312         | 7     | $F_1$ | 2          | 6    | $F_2$ | 141       |     |
| 5719.544520                    | 5719.492679                    | 51.841                                                | $0.1439 \times 10^{-3}$             | $0.1142 \times 10^{-3}$             | 26.019         | 7     | $E$   | 1          | 6    | $E$   | 93        |     |
| 5719.760032                    | 5719.790901                    | -30.869                                               |                                     | $0.1128 \times 10^{-4}$             |                |       | 4     | $F_2$      | 1    | 5     | $F_1$     | 99  |
| 5719.879160                    | 5719.876863                    | 2.297                                                 | $0.1744 \times 10^{-3}$             | $0.1627 \times 10^{-3}$             | 7.210          | 7     | $F_2$ | 2          | 6    | $F_1$ | 135       |     |
| 5720.410129                    | 5720.443349                    | -33.220                                               | $0.2603 \times 10^{-3}$             | $0.1970 \times 10^{-3}$             | 32.165         | 7     | $A_2$ | 1          | 6    | $A_1$ | 49        |     |
| 5721.129680                    | 5721.150702                    | -21.022                                               | $0.1357 \times 10^{-3}$             | $0.1573 \times 10^{-3}$             | -13.717        | 10    | $F_2$ | 3          | 9    | $F_1$ | 222       |     |
| 5721.476079                    | 5721.477365                    | -1.286                                                | $0.3376 \times 10^{-3}$             | $0.2095 \times 10^{-3}$             | 61.163         | 4     | $E$   | 1          | 5    | $E$   | 63        |     |
| 5721.500294                    | 5721.515574                    | -15.280                                               | $0.8535 \times 10^{-4}$             | $0.9761 \times 10^{-4}$             | -12.561        | 10    | $F_1$ | 2          | 9    | $F_2$ | 216       |     |
| 5721.694509                    | 5721.704584                    | -10.075                                               |                                     | $0.3801 \times 10^{-3}$             |                |       | 4     | $F_1$      | 1    | 5     | $F_2$     | 94  |
| 5721.754669                    | 5721.719005                    | 35.664                                                |                                     | $0.4785 \times 10^{-4}$             |                |       | 7     | $F_1$      | 1    | 6     | $F_2$     | 142 |
| 5722.079404                    | 5722.097312                    | -17.908                                               |                                     | $0.7955 \times 10^{-3}$             |                |       | 4     | $A_1$      | 1    | 5     | $A_2$     | 34  |
| 5722.569020                    | 5722.601541                    | -32.521                                               | $0.1548 \times 10^{-3}$             | $0.1394 \times 10^{-3}$             | 11.027         | 7     | $F_2$ | 1          | 6    | $F_1$ | 137       |     |
| 5723.308733                    | 5723.292673                    | 16.060                                                | $0.7014 \times 10^{-3}$             | $0.7446 \times 10^{-3}$             | -5.802         | 9     | $E$   | 1          | 8    | $E$   | 129       |     |
| 5723.484000                    | 5723.493971                    | -9.971                                                |                                     | $0.1643 \times 10^{-4}$             |                |       | 11    | $F_2$      | 2    | 10    | $F_1$     | 249 |
| 5723.653110                    | 5723.663150                    | -10.040                                               | $0.2359 \times 10^{-4}$             | $0.7034 \times 10^{-4}$             | -66.463        | 11    | $F_2$ | 1          | 10   | $F_1$ | 249       |     |
| 5723.975174                    | 5723.959868                    | 15.306                                                | $0.1137 \times 10^{-2}$             | $0.1182 \times 10^{-2}$             | -3.838         | 9     | $F_1$ | 2          | 8    | $F_2$ | 194       |     |
| 5724.346790                    | 5724.351196                    | -4.406                                                | $0.1273 \times 10^{-3}$             | $0.6249 \times 10^{-4}$             | 103.728        | 5     | $F_1$ | 2          | 6    | $F_2$ | 109       |     |
| 5724.358000                    | 5724.365777                    | -7.777                                                |                                     | $0.1028 \times 10^{-4}$             |                |       | 5     | $F_1$      | 1    | 6     | $F_2$     | 109 |
| 5726.505397                    | 5726.497223                    | 8.174                                                 | $0.3175 \times 10^{-4}$             | $0.2306 \times 10^{-4}$             | 37.690         | 10    | $F_1$ | 2          | 9    | $F_2$ | 219       |     |
| 5726.684150                    | 5726.682282                    | 1.868                                                 | $0.1853 \times 10^{-2}$             | $0.1933 \times 10^{-2}$             | -4.148         | 9     | $A_1$ | 1          | 8    | $A_2$ | 62        |     |
| 5726.836321                    | 5726.847828                    | -11.507                                               | $0.2833 \times 10^{-2}$             | $0.3047 \times 10^{-2}$             | -7.038         | 8     | $A_1$ | 1          | 7    | $A_2$ | 59        |     |
| 5727.334592                    | 5727.351600                    | -17.008                                               | $0.1736 \times 10^{-2}$             | $0.1798 \times 10^{-2}$             | -3.460         | 8     | $F_1$ | 1          | 7    | $F_2$ | 167       |     |
| 5727.404171                    | 5727.402151                    | 2.020                                                 | $0.3860 \times 10^{-4}$             | $0.3581 \times 10^{-4}$             | 7.792          | 10    | $F_2$ | 3          | 9    | $F_1$ | 225       |     |
| 5727.520279                    | 5727.517491                    | 2.788                                                 | $0.2464 \times 10^{-4}$             | $0.2198 \times 10^{-4}$             | 12.113         | 10    | $F_2$ | 2          | 9    | $F_1$ | 225       |     |
| 5727.616399                    | 5727.636757                    | -20.358                                               | $0.1120 \times 10^{-2}$             | $0.1187 \times 10^{-2}$             | -5.655         | 8     | $E$   | 1          | 7    | $E$   | 111       |     |
| 5728.338313                    | 5728.333232                    | 5.081                                                 | $0.1388 \times 10^{-2}$             | $0.1020 \times 10^{-2}$             | 36.013         | 9     | $F_1$ | 3          | 8    | $F_2$ | 195       |     |
| 5728.760510                    | 5728.754926                    | 5.584                                                 | $0.9815 \times 10^{-4}$             | $0.7338 \times 10^{-4}$             | 33.747         | 7     | $F_1$ | 1          | 6    | $F_2$ | 144       |     |
| 5729.260672                    | 5729.268329                    | -7.657                                                |                                     | $0.9779 \times 10^{-3}$             |                |       | 9     | $F_2$      | 2    | 8     | $F_1$     | 191 |
| 5730.261618                    | 5730.284569                    | -22.951                                               | $0.1784 \times 10^{-2}$             | $0.1779 \times 10^{-2}$             | 0.255          | 9     | $A_2$ | 1          | 8    | $A_1$ | 69        |     |
| 5730.725723                    | 5730.754293                    | -28.570                                               |                                     | $0.2542 \times 10^{-3}$             |                |       | 7     | $F_1$      | 2    | 6     | $F_2$     | 145 |
| 5730.768639                    | 5730.784426                    | -15.787                                               |                                     | $0.3459 \times 10^{-4}$             |                |       | 7     | $F_2$      | 1    | 6     | $F_1$     | 139 |
| 5730.796620                    | 5730.834637                    | -38.017                                               |                                     | $0.9695 \times 10^{-4}$             |                |       | 7     | $E$        | 1    | 6     | $E$       | 97  |
| 5731.151650                    | 5731.126564                    | 25.086                                                | $0.2336 \times 10^{-3}$             | $0.1667 \times 10^{-3}$             | 40.111         | 7     | $A_2$ | 1          | 6    | $A_1$ | 50        |     |
| 5731.977311                    | 5731.983923                    | -6.612                                                | $0.8516 \times 10^{-3}$             | $0.6780 \times 10^{-3}$             | 25.600         | 5     | $F_1$ | 2          | 6    | $F_2$ | 113       |     |
| 5731.992000                    | 5731.998503                    | -6.503                                                |                                     | $0.3706 \times 10^{-4}$             |                |       | 5     | $F_1$      | 1    | 6     | $F_2$     | 113 |
| 5732.299712                    | 5732.306275                    | -6.563                                                | $0.4807 \times 10^{-3}$             | $0.3651 \times 10^{-3}$             | 31.672         | 5     | $E$   | 1          | 6    | $E$   | 75        |     |
| 5732.603672                    | 5732.576747                    | 26.925                                                |                                     | $0.1770 \times 10^{-3}$             |                |       | 7     | $F_1$      | 1    | 6     | $F_2$     | 146 |
| 5732.653010                    | 5732.647572                    | 5.438                                                 |                                     | $0.6271 \times 10^{-3}$             |                |       | 7     | $A_2$      | 1    | 6     | $A_1$     | 51  |
| 5732.755515                    | 5732.755834                    | -0.319                                                | $0.3065 \times 10^{-3}$             | $0.2979 \times 10^{-3}$             | 2.895          | 7     | $F_2$ | 2          | 6    | $F_1$ | 141       |     |
| 5732.792000                    | 5732.793852                    | -1.852                                                |                                     | $0.1181 \times 10^{-4}$             |                |       | 7     | $F_2$      | 1    | 6     | $F_1$     | 141 |
| 5733.293500                    | 5733.344742                    | -51.242                                               | $0.1741 \times 10^{-3}$             | $0.1452 \times 10^{-3}$             | 19.898         | 5     | $E$   | 1          | 6    | $E$   | 76        |     |
| 5734.074000                    | 5734.066023                    | 7.977                                                 | $0.2446 \times 10^{-4}$             | $0.3449 \times 10^{-4}$             | -29.071        | 9     | $F_1$ | 2          | 8    | $F_2$ | 197       |     |
| 5734.233445                    | 5734.284366                    | -50.921                                               | $0.2420 \times 10^{-3}$             | $0.2582 \times 10^{-3}$             | -6.270         | 6     | $A_1$ | 1          | 5    | $A_2$ | 41        |     |
| 5734.625981                    | 5734.635678                    | -9.697                                                |                                     | $0.1647 \times 10^{-3}$             |                |       | 6     | $F_1$      | 1    | 5     | $F_2$     | 115 |
| 5735.097750                    | 5735.088963                    | 8.787                                                 | $0.1669 \times 10^{-3}$             | $0.1665 \times 10^{-3}$             | 0.268          | 6     | $F_2$ | 2          | 5    | $F_1$ | 120       |     |
| 5735.408843                    | 5735.410912                    | -2.069                                                | $0.1524 \times 10^{-2}$             | $0.1563 \times 10^{-2}$             | -2.509         | 8     | $F_2$ | 1          | 7    | $F_1$ | 172       |     |
| 5736.679800                    | 5736.684847                    | -5.047                                                | $0.7613 \times 10^{-4}$             | $0.7192 \times 10^{-4}$             | 5.851          | 6     | $F_2$ | 1          | 5    | $F_1$ | 121       |     |

Table II (continued).

| $\tilde{\nu}_e/\text{cm}^{-1}$ | $\tilde{\nu}_c/\text{cm}^{-1}$ | $\tilde{\nu}_e - \tilde{\nu}_c/10^{-3}\text{cm}^{-1}$ | $I_e/\text{cm}^{-2}\text{atm}^{-1}$ | $I_c/\text{cm}^{-2}\text{atm}^{-1}$ | $I_e - I_c/\%$ | $J''$ | $C''$ | $\alpha''$ | $J'$ | $C'$  | $\alpha'$ |
|--------------------------------|--------------------------------|-------------------------------------------------------|-------------------------------------|-------------------------------------|----------------|-------|-------|------------|------|-------|-----------|
| 5738.047204                    | 5738.049704                    | -2.500                                                | $0.1330 \times 10^{-2}$             | $0.1349 \times 10^{-2}$             | -1.421         | 8     | $F_1$ | 2          | 7    | $F_2$ | 169       |
| 5738.789330                    | 5738.792749                    | -3.419                                                |                                     | $0.3290 \times 10^{-4}$             |                | 6     | $F_2$ | 2          | 5    | $F_1$ | 122       |
| 5738.811230                    | 5738.814465                    | -3.235                                                | $0.5267 \times 10^{-4}$             | $0.5540 \times 10^{-4}$             | -4.920         | 6     | $F_2$ | 1          | 5    | $F_1$ | 122       |
| 5738.960000                    | 5738.949383                    | 10.617                                                | $0.1223 \times 10^{-4}$             | $0.1552 \times 10^{-4}$             | -21.186        | 9     | $F_1$ | 2          | 8    | $F_2$ | 200       |
| 5739.190990                    | 5739.196540                    | -5.550                                                | $0.1079 \times 10^{-3}$             | $0.9947 \times 10^{-4}$             | 8.473          | 10    | $E$   | 2          | 9    | $E$   | 155       |
| 5739.339000                    | 5739.371953                    | -32.953                                               | $0.1712 \times 10^{-4}$             | $0.2418 \times 10^{-4}$             | -29.198        | 6     | $F_1$ | 1          | 5    | $F_2$ | 117       |
| 5739.690478                    | 5739.710864                    | -20.386                                               | $0.2312 \times 10^{-2}$             | $0.2409 \times 10^{-2}$             | -4.037         | 7     | $F_1$ | 1          | 6    | $F_2$ | 148       |
| 5739.847554                    | 5739.830766                    | 16.788                                                | $0.9649 \times 10^{-3}$             | $0.9829 \times 10^{-3}$             | -1.827         | 8     | $E$   | 2          | 7    | $E$   | 113       |
| 5740.149508                    | 5740.146763                    | 2.745                                                 | $0.6092 \times 10^{-3}$             | $0.5495 \times 10^{-3}$             | 10.856         | 5     | $F_2$ | 1          | 6    | $F_1$ | 111       |
| 5740.561774                    | 5740.283232                    | 278.542                                               | $0.5796 \times 10^{-3}$             | $0.1189 \times 10^{-3}$             | 387.300        | 5     | $F_1$ | 1          | 6    | $F_2$ | 116       |
| 5740.457596                    | 5740.474275                    | -16.679                                               | $0.2313 \times 10^{-2}$             | $0.2323 \times 10^{-2}$             | -0.448         | 7     | $F_2$ | 1          | 6    | $F_1$ | 142       |
| 5740.904601                    | 5740.906444                    | -1.843                                                | $0.1517 \times 10^{-2}$             | $0.1476 \times 10^{-2}$             | 2.790          | 8     | $F_2$ | 2          | 7    | $F_1$ | 174       |
| 5743.572690                    | 5743.556224                    | 16.466                                                |                                     | $0.5843 \times 10^{-4}$             |                | 6     | $E$   | 1          | 5    | $E$   | 79        |
| 5743.675010                    | 5743.663203                    | 11.807                                                | $0.6706 \times 10^{-4}$             | $0.5477 \times 10^{-4}$             | 22.445         | 6     | $F_2$ | 1          | 5    | $F_1$ | 123       |
| 5744.048260                    | 5743.990752                    | 57.508                                                |                                     | $0.3640 \times 10^{-3}$             |                | 6     | $A_1$ | 1          | 7    | $A_2$ | 44        |
| 5745.191826                    | 5745.209071                    | -17.245                                               | $0.9676 \times 10^{-4}$             | $0.9192 \times 10^{-4}$             | 5.267          | 8     | $F_1$ | 2          | 7    | $F_2$ | 171       |
| 5745.244268                    | 5745.265639                    | -21.371                                               | $0.3577 \times 10^{-3}$             | $0.3475 \times 10^{-3}$             | 2.945          | 6     | $F_1$ | 1          | 5    | $F_2$ | 119       |
| 5745.401000                    | 5745.401854                    | -0.854                                                |                                     | $0.2245 \times 10^{-4}$             |                | 8     | $E$   | 1          | 7    | $E$   | 114       |
| 5745.553442                    | 5745.573971                    | -20.529                                               | $0.1170 \times 10^{-2}$             | $0.1100 \times 10^{-2}$             | 6.389          | 6     | $A_1$ | 1          | 5    | $A_2$ | 42        |
| 5746.610000                    | 5746.612830                    | -2.830                                                |                                     | $0.1669 \times 10^{-4}$             |                | 7     | $F_2$ | 2          | 6    | $F_1$ | 143       |
| 5746.850050                    | 5746.880581                    | -30.531                                               | $0.2121 \times 10^{-3}$             | $0.2045 \times 10^{-3}$             | 3.738          | 6     | $F_2$ | 2          | 5    | $F_1$ | 125       |
| 5746.872248                    | 5746.902297                    | -30.049                                               | $0.2958 \times 10^{-3}$             | $0.2353 \times 10^{-3}$             | 25.701         | 6     | $F_2$ | 1          | 5    | $F_1$ | 125       |
| 5746.915041                    | 5746.923613                    | -8.572                                                | $0.3374 \times 10^{-2}$             | $0.3545 \times 10^{-2}$             | -4.817         | 7     | $A_2$ | 1          | 6    | $A_1$ | 52        |
| 5747.669970                    | 5747.665861                    | 4.109                                                 | $0.4039 \times 10^{-3}$             | $0.3816 \times 10^{-3}$             | 5.841          | 10    | $A_1$ | 1          | 9    | $A_2$ | 81        |
| 5747.826712                    | 5747.839365                    | -12.653                                               | $0.3366 \times 10^{-3}$             | $0.2968 \times 10^{-3}$             | 13.428         | 6     | $F_2$ | 2          | 5    | $F_1$ | 126       |
| 5747.846886                    | 5747.861082                    | -14.196                                               |                                     | $0.2333 \times 10^{-4}$             |                | 6     | $F_2$ | 1          | 5    | $F_1$ | 126       |
| 5748.153046                    | 5748.088351                    | 64.695                                                |                                     | $0.8549 \times 10^{-3}$             |                | 9     | $A_1$ | 1          | 8    | $A_2$ | 66        |
| 5748.833660                    | 5748.832185                    | 1.475                                                 | $0.6510 \times 10^{-3}$             | $0.5699 \times 10^{-3}$             | 14.238         | 6     | $F_1$ | 1          | 7    | $F_2$ | 127       |
| 5748.872800                    | 5748.870734                    | 2.066                                                 | $0.2080 \times 10^{-2}$             | $0.2005 \times 10^{-2}$             | 3.744          | 7     | $F_2$ | 2          | 6    | $F_1$ | 144       |
| 5749.070676                    | 5749.059347                    | 11.329                                                |                                     | $0.1876 \times 10^{-4}$             |                | 8     | $A_1$ | 1          | 7    | $A_2$ | 61        |
| 5749.293326                    | 5749.290703                    | 2.623                                                 |                                     | $0.7114 \times 10^{-3}$             |                | 7     | $E$   | 1          | 6    | $E$   | 99        |
| 5749.718770                    | 5749.742259                    | -23.489                                               | $0.1333 \times 10^{-3}$             | $0.1439 \times 10^{-3}$             | -7.364         | 5     | $F_1$ | 2          | 4    | $F_2$ | 97        |
| 5750.123871                    | 5750.113329                    | 10.542                                                |                                     | $0.4213 \times 10^{-4}$             |                | 9     | $F_2$ | 2          | 8    | $F_1$ | 205       |
| 5750.255280                    | 5750.255562                    | -0.282                                                | $0.8528 \times 10^{-4}$             | $0.9924 \times 10^{-4}$             | -14.068        | 5     | $E$   | 1          | 4    | $E$   | 65        |
| 5750.750211                    | 5750.723496                    | 26.715                                                | $0.6006 \times 10^{-3}$             | $0.5252 \times 10^{-3}$             | 14.353         | 6     | $F_2$ | 2          | 7    | $F_1$ | 132       |
| 5750.771590                    | 5750.745213                    | 26.377                                                |                                     | $0.2969 \times 10^{-4}$             |                | 6     | $F_2$ | 1          | 7    | $F_1$ | 132       |
| 5750.974252                    | 5751.023818                    | -49.566                                               |                                     | $0.6410 \times 10^{-3}$             |                | 7     | $E$   | 1          | 6    | $E$   | 100       |
| 5751.445850                    | 5751.447716                    | -1.866                                                | $0.1225 \times 10^{-3}$             | $0.1350 \times 10^{-3}$             | -9.283         | 5     | $F_2$ | 1          | 4    | $F_1$ | 94        |
| 5751.959190                    | 5751.972868                    | -13.678                                               | $0.6219 \times 10^{-4}$             | $0.6244 \times 10^{-4}$             | -0.404         | 5     | $F_1$ | 1          | 4    | $F_2$ | 98        |
| 5752.097926                    | 5752.116710                    | -18.784                                               | $0.1930 \times 10^{-2}$             | $0.1989 \times 10^{-2}$             | -2.959         | 6     | $E$   | 1          | 5    | $E$   | 81        |
| 5752.134930                    | 5752.149469                    | -14.539                                               | $0.1797 \times 10^{-2}$             | $0.1816 \times 10^{-2}$             | -1.053         | 7     | $F_1$ | 2          | 6    | $F_2$ | 151       |
| 5752.188500                    | 5752.205160                    | -16.660                                               |                                     | $0.2954 \times 10^{-7}$             |                | 7     | $F_1$ | 1          | 6    | $F_2$ | 151       |
| 5752.643208                    | 5752.656105                    | -12.897                                               | $0.2740 \times 10^{-2}$             | $0.2907 \times 10^{-2}$             | -5.738         | 6     | $F_2$ | 1          | 5    | $F_1$ | 127       |
| 5752.848039                    | 5752.825055                    | 22.984                                                |                                     | $0.1256 \times 10^{-3}$             |                | 9     | $F_1$ | 3          | 8    | $F_2$ | 211       |
| 5752.876468                    | 5752.914051                    | -37.583                                               |                                     | $0.1466 \times 10^{-2}$             |                | 9     | $A_2$ | 1          | 8    | $A_1$ | 74        |
| 5753.574835                    | 5753.530608                    | 44.227                                                | $0.1268 \times 10^{-3}$             | $0.1255 \times 10^{-3}$             | 1.032          | 5     | $F_2$ | 1          | 4    | $F_1$ | 95        |
| 5753.611675                    | 5753.627720                    | -16.045                                               | $0.5688 \times 10^{-3}$             | $0.4200 \times 10^{-3}$             | 35.433         | 9     | $F_2$ | 2          | 8    | $F_1$ | 208       |
| 5753.758000                    | 5753.772436                    | -14.436                                               |                                     | $0.2172 \times 10^{-4}$             |                | 9     | $F_2$ | 1          | 8    | $F_1$ | 208       |
| 5754.005557                    | 5754.000028                    | 5.529                                                 | $0.3885 \times 10^{-2}$             | $0.4452 \times 10^{-2}$             | -12.727        | 6     | $A_2$ | 1          | 5    | $A_1$ | 39        |
| 5755.710700                    | 5755.719689                    | -8.989                                                | $0.1514 \times 10^{-3}$             | $0.8883 \times 10^{-4}$             | 70.431         | 7     | $E$   | 1          | 6    | $E$   | 101       |

Table II (continued).

| $\tilde{\nu}_e/\text{cm}^{-1}$ | $\tilde{\nu}_c/\text{cm}^{-1}$ | $\tilde{\nu}_e - \tilde{\nu}_c/10^{-3}\text{cm}^{-1}$ | $I_e/\text{cm}^{-2}\text{atm}^{-1}$ | $I_c/\text{cm}^{-2}\text{atm}^{-1}$ | $I_e - I_c/\%$ | $J''$ | $C''$ | $\alpha''$ | $J'$ | $C'$  | $\alpha'$ |
|--------------------------------|--------------------------------|-------------------------------------------------------|-------------------------------------|-------------------------------------|----------------|-------|-------|------------|------|-------|-----------|
| 5757.043507                    | 5757.031173                    | 12.334                                                | $0.4827 \times 10^{-3}$             | $0.4461 \times 10^{-3}$             | 8.203          | 9     | $F_1$ | 3          | 8    | $F_2$ | 214       |
| 5757.093893                    | 5757.080892                    | 13.001                                                | $0.1313 \times 10^{-3}$             | $0.1289 \times 10^{-3}$             | 1.869          | 9     | $F_1$ | 2          | 8    | $F_2$ | 214       |
| 5757.185350                    | 5757.180977                    | 4.373                                                 | $0.1780 \times 10^{-3}$             | $0.1464 \times 10^{-3}$             | 21.549         | 7     | $F_2$ | 2          | 6    | $F_1$ | 145       |
| 5757.221339                    | 5757.218995                    | 2.344                                                 |                                     | $0.5166 \times 10^{-4}$             |                | 7     | $F_2$ | 1          | 6    | $F_1$ | 145       |
| 5757.544967                    | 5757.539208                    | 5.759                                                 |                                     | $0.1943 \times 10^{-3}$             |                | 8     | $A_1$ | 1          | 7    | $A_2$ | 63        |
| 5757.891000                    | 5757.884500                    | 6.500                                                 |                                     | $0.1415 \times 10^{-4}$             |                | 7     | $E$   | 1          | 6    | $E$   | 102       |
| 5758.364586                    | 5758.379501                    | -14.915                                               |                                     | $0.3094 \times 10^{-4}$             |                | 6     | $E$   | 1          | 5    | $E$   | 82        |
| 5758.497710                    | 5758.471694                    | 26.016                                                | $0.1612 \times 10^{-3}$             | $0.1558 \times 10^{-3}$             | 3.438          | 5     | $F_2$ | 1          | 4    | $F_1$ | 96        |
| 5758.584850                    | 5758.567495                    | 17.355                                                | $0.1661 \times 10^{-3}$             | $0.1514 \times 10^{-3}$             | 9.711          | 5     | $F_1$ | 1          | 4    | $F_2$ | 99        |
| 5758.863050                    | 5758.873904                    | -10.854                                               | $0.1010 \times 10^{-3}$             | $0.1058 \times 10^{-3}$             | -4.498         | 8     | $F_2$ | 2          | 7    | $F_1$ | 183       |
| 5758.906000                    | 5758.914299                    | -8.299                                                | $0.4668 \times 10^{-4}$             | $0.4730 \times 10^{-4}$             | -1.315         | 8     | $F_2$ | 1          | 7    | $F_1$ | 183       |
| 5758.926620                    | 5758.928414                    | -1.794                                                | $0.3481 \times 10^{-3}$             | $0.3130 \times 10^{-3}$             | 11.226         | 8     | $F_1$ | 2          | 7    | $F_2$ | 179       |
| 5759.263227                    | 5759.273505                    | -10.278                                               | $0.1025 \times 10^{-2}$             | $0.7848 \times 10^{-3}$             | 30.614         | 6     | $A_2$ | 1          | 7    | $A_1$ | 42        |
| 5759.464427                    | 5759.472935                    | -8.508                                                | $0.3009 \times 10^{-3}$             | $0.3049 \times 10^{-3}$             | -1.299         | 5     | $E$   | 1          | 4    | $E$   | 67        |
| 5759.503573                    | 5759.478129                    | 25.444                                                |                                     | $0.4856 \times 10^{-3}$             |                | 6     | $F_2$ | 1          | 7    | $F_1$ | 136       |
| 5759.585151                    | 5759.523511                    | 61.640                                                |                                     | $0.3743 \times 10^{-3}$             |                | 6     | $E$   | 1          | 7    | $E$   | 88        |
| 5760.152375                    | 5760.148407                    | 3.968                                                 | $0.9923 \times 10^{-3}$             | $0.9549 \times 10^{-3}$             | 3.914          | 5     | $F_1$ | 2          | 4    | $F_2$ | 100       |
| 5760.198339                    | 5760.194610                    | 3.729                                                 | $0.2127 \times 10^{-2}$             | $0.2196 \times 10^{-2}$             | -3.122         | 6     | $F_2$ | 2          | 5    | $F_1$ | 128       |
| 5760.259592                    | 5760.274595                    | -15.003                                               |                                     | $0.7648 \times 10^{-5}$             |                | 12    | $F_2$ | 2          | 12   | $F_1$ | 246       |
| 5760.402440                    | 5760.416177                    | -13.737                                               |                                     | $0.1049 \times 10^{-4}$             |                | 12    | $F_2$ | 1          | 12   | $F_1$ | 246       |
| 5761.336950                    | 5761.329493                    | 7.457                                                 | $0.1395 \times 10^{-2}$             | $0.1429 \times 10^{-2}$             | -2.379         | 6     | $F_1$ | 1          | 5    | $F_2$ | 122       |
| 5761.379920                    | 5761.385625                    | -5.705                                                | $0.1095 \times 10^{-3}$             | $0.9342 \times 10^{-4}$             | 17.211         | 5     | $F_1$ | 2          | 4    | $F_2$ | 101       |
| 5761.393450                    | 5761.400206                    | -6.756                                                |                                     | $0.1073 \times 10^{-3}$             |                | 5     | $F_1$ | 1          | 4    | $F_2$ | 101       |
| 5762.821380                    | 5762.823157                    | -1.777                                                |                                     | $0.2445 \times 10^{-4}$             |                | 7     | $F_2$ | 2          | 6    | $F_1$ | 149       |
| 5762.857600                    | 5762.861176                    | -3.576                                                | $0.7513 \times 10^{-4}$             | $0.7768 \times 10^{-4}$             | -3.281         | 7     | $F_2$ | 1          | 6    | $F_1$ | 149       |
| 5763.290769                    | 5763.241765                    | 49.004                                                |                                     | $0.7013 \times 10^{-3}$             |                | 8     | $F_2$ | 2          | 7    | $F_1$ | 186       |
| 5763.307270                    | 5763.330640                    | -23.370                                               | $0.1115 \times 10^{-2}$             | $0.1112 \times 10^{-2}$             | 0.263          | 6     | $F_1$ | 1          | 5    | $F_2$ | 123       |
| 5763.595612                    | 5763.603246                    | -7.634                                                | $0.4125 \times 10^{-2}$             | $0.4447 \times 10^{-2}$             | -7.244         | 6     | $A_1$ | 1          | 5    | $A_2$ | 44        |
| 5763.889200                    | 5763.872618                    | 16.582                                                | $0.1577 \times 10^{-3}$             | $0.1523 \times 10^{-3}$             | 3.544          | 8     | $A_1$ | 1          | 7    | $A_2$ | 65        |
| 5764.478622                    | 5764.492802                    | -14.180                                               | $0.3344 \times 10^{-2}$             | $0.3507 \times 10^{-2}$             | -4.640         | 5     | $F_1$ | 1          | 4    | $F_2$ | 102       |
| 5765.019350                    | 5765.039263                    | -19.913                                               | $0.1257 \times 10^{-3}$             | $0.9863 \times 10^{-4}$             | 27.448         | 4     | $F_2$ | 1          | 3    | $F_1$ | 77        |
| 5765.904020                    | 5765.915561                    | -11.541                                               |                                     | $0.1072 \times 10^{-3}$             |                | 4     | $E$   | 1          | 3    | $E$   | 49        |
| 5766.037494                    | 5766.025762                    | 11.732                                                | $0.2813 \times 10^{-2}$             | $0.2951 \times 10^{-2}$             | -4.662         | 5     | $F_2$ | 1          | 4    | $F_1$ | 98        |
| 5766.694380                    | 5766.499243                    | 195.137                                               | $0.2359 \times 10^{-3}$             | $0.1654 \times 10^{-3}$             | 42.650         | 8     | $F_2$ | 2          | 7    | $F_1$ | 188       |
| 5766.734430                    | 5766.539638                    | 194.792                                               | $0.2310 \times 10^{-3}$             | $0.2322 \times 10^{-3}$             | -0.514         | 8     | $F_2$ | 1          | 7    | $F_1$ | 188       |
| 5766.976120                    | 5766.991460                    | -15.340                                               | $0.1171 \times 10^{-3}$             | $0.1146 \times 10^{-3}$             | 2.188          | 4     | $F_1$ | 1          | 3    | $F_2$ | 73        |
| 5767.163640                    | 5767.153428                    | 10.212                                                | $0.1098 \times 10^{-3}$             | $0.1229 \times 10^{-3}$             | -10.670        | 6     | $F_2$ | 2          | 5    | $F_1$ | 130       |
| 5767.182599                    | 5767.175144                    | 7.455                                                 |                                     | $0.2473 \times 10^{-4}$             |                | 6     | $F_2$ | 1          | 5    | $F_1$ | 130       |
| 5767.705328                    | 5767.741268                    | -35.940                                               |                                     | $0.4331 \times 10^{-3}$             |                | 9     | $F_1$ | 1          | 8    | $F_2$ | 220       |
| 5767.961040                    | 5767.890399                    | 70.641                                                |                                     | $0.1373 \times 10^{-3}$             |                | 7     | $E$   | 1          | 6    | $E$   | 104       |
| 5768.287620                    | 5768.234995                    | 52.625                                                |                                     | $0.7314 \times 10^{-4}$             |                | 7     | $F_2$ | 2          | 6    | $F_1$ | 151       |
| 5768.361264                    | 5768.345157                    | 16.107                                                |                                     | $0.2307 \times 10^{-4}$             |                | 6     | $F_1$ | 1          | 5    | $F_2$ | 124       |
| 5768.841032                    | 5768.781078                    | 59.954                                                | $0.1219 \times 10^{-3}$             | $0.9732 \times 10^{-4}$             | 25.255         | 4     | $F_1$ | 1          | 3    | $F_2$ | 74        |
| 5768.913649                    | 5768.895900                    | 17.749                                                |                                     | $0.8497 \times 10^{-4}$             |                | 6     | $F_1$ | 1          | 5    | $F_2$ | 125       |
| 5769.304803                    | 5769.309974                    | -5.171                                                |                                     | $0.6373 \times 10^{-4}$             |                | 5     | $F_1$ | 1          | 4    | $F_2$ | 103       |
| 5769.821350                    | 5769.843191                    | -21.841                                               | $0.1007 \times 10^{-3}$             | $0.9023 \times 10^{-4}$             | 11.598         | 5     | $F_2$ | 1          | 4    | $F_1$ | 99        |
| 5769.974000                    | 5769.973635                    | 0.365                                                 |                                     | $0.1012 \times 10^{-3}$             |                | 7     | $E$   | 1          | 6    | $E$   | 105       |
| 5770.826447                    | 5770.817225                    | 9.222                                                 |                                     | $0.4455 \times 10^{-4}$             |                | 8     | $F_2$ | 2          | 7    | $F_1$ | 190       |
| 5770.868020                    | 5770.857620                    | 10.400                                                |                                     | $0.6576 \times 10^{-3}$             |                | 8     | $F_2$ | 1          | 7    | $F_1$ | 190       |
| 5771.832000                    | 5771.810166                    | 21.834                                                | $0.1223 \times 10^{-3}$             | $0.1295 \times 10^{-3}$             | -5.581         | 8     | $F_2$ | 2          | 7    | $F_1$ | 191       |

Table II (continued).

| $\tilde{\nu}_e/\text{cm}^{-1}$ | $\tilde{\nu}_c/\text{cm}^{-1}$ | $\tilde{\nu}_e - \tilde{\nu}_c/10^{-3}\text{cm}^{-1}$ | $I_e/\text{cm}^{-2}\text{atm}^{-1}$ | $I_c/\text{cm}^{-2}\text{atm}^{-1}$ | $I_e - I_c/\%$ | $J''$ | $C''$ | $\alpha''$ | $J'$ | $C'$  | $\alpha'$ |
|--------------------------------|--------------------------------|-------------------------------------------------------|-------------------------------------|-------------------------------------|----------------|-------|-------|------------|------|-------|-----------|
| 5771.873260                    | 5771.850560                    | 22.700                                                |                                     | $0.5560 \times 10^{-4}$             |                | 8     | $F_2$ | 1          | 7    | $F_1$ | 191       |
| 5771.951940                    | 5771.956459                    | -4.519                                                | $0.1174 \times 10^{-3}$             | $0.1125 \times 10^{-3}$             | 4.319          | 8     | $E$   | 2          | 7    | $E$   | 125       |
| 5772.035573                    | 5772.042101                    | -6.528                                                |                                     | $0.2559 \times 10^{-4}$             |                | 8     | $E$   | 1          | 7    | $E$   | 125       |
| 5772.145775                    | 5772.141466                    | 4.309                                                 | $0.1389 \times 10^{-2}$             | $0.1405 \times 10^{-2}$             | -1.142         | 5     | $E$   | 1          | 4    | $E$   | 69        |
| 5772.970101                    | 5772.944422                    | 25.679                                                |                                     | $0.2669 \times 10^{-5}$             |                | 4     | $F_2$ | 1          | 3    | $F_1$ | 79        |
| 5773.087971                    | 5773.100718                    | -12.747                                               | $0.1064 \times 10^{-3}$             | $0.1382 \times 10^{-3}$             | -23.035        | 7     | $F_1$ | 2          | 6    | $F_2$ | 160       |
| 5773.144869                    | 5773.156409                    | -11.540                                               |                                     | $0.5516 \times 10^{-4}$             |                | 7     | $F_1$ | 1          | 6    | $F_2$ | 160       |
| 5773.193028                    | 5773.202162                    | -9.134                                                |                                     | $0.2637 \times 10^{-3}$             |                | 7     | $E$   | 1          | 6    | $E$   | 106       |
| 5773.281650                    | 5773.271442                    | 10.208                                                | $0.4154 \times 10^{-3}$             | $0.4708 \times 10^{-3}$             | -11.772        | 4     | $F_1$ | 1          | 3    | $F_2$ | 75        |
| 5773.582000                    | 5773.566889                    | 15.111                                                |                                     | $0.1004 \times 10^{-4}$             |                | 6     | $F_1$ | 1          | 5    | $F_2$ | 127       |
| 5773.624113                    | 5773.648225                    | -24.112                                               | $0.1569 \times 10^{-2}$             | $0.1641 \times 10^{-2}$             | -4.411         | 4     | $A_1$ | 1          | 3    | $A_2$ | 28        |
| 5773.838216                    | 5773.840983                    | -2.767                                                | $0.2867 \times 10^{-2}$             | $0.2853 \times 10^{-2}$             | 0.480          | 5     | $F_1$ | 2          | 4    | $F_2$ | 104       |
| 5774.164318                    | 5774.119682                    | 44.636                                                | $0.7963 \times 10^{-3}$             | $0.7402 \times 10^{-3}$             | 7.574          | 4     | $E$   | 1          | 3    | $E$   | 50        |
| 5774.408490                    | 5774.386513                    | 21.977                                                |                                     | $0.6317 \times 10^{-3}$             |                | 7     | $F_1$ | 2          | 6    | $F_2$ | 162       |
| 5774.465000                    | 5774.442204                    | 22.796                                                |                                     | $0.1006 \times 10^{-4}$             |                | 7     | $F_1$ | 1          | 6    | $F_2$ | 162       |
| 5774.677838                    | 5774.647218                    | 30.620                                                | $0.1591 \times 10^{-2}$             | $0.1568 \times 10^{-2}$             | 1.486          | 4     | $F_2$ | 1          | 3    | $F_1$ | 80        |
| 5775.175700                    | 5775.184468                    | -8.768                                                |                                     | $0.8386 \times 10^{-4}$             |                | 5     | $F_2$ | 1          | 4    | $F_1$ | 100       |
| 5775.924560                    | 5775.959823                    | -35.263                                               |                                     | $0.3522 \times 10^{-3}$             |                | 8     | $E$   | 1          | 7    | $E$   | 126       |
| 5776.079250                    | 5776.110197                    | -30.947                                               | $0.2561 \times 10^{-4}$             | $0.2144 \times 10^{-4}$             | 19.438         | 7     | $F_1$ | 2          | 6    | $F_2$ | 163       |
| 5776.133820                    | 5776.165887                    | -32.067                                               | $0.7427 \times 10^{-4}$             | $0.8759 \times 10^{-4}$             | -15.210        | 7     | $F_1$ | 1          | 6    | $F_2$ | 163       |
| 5776.471260                    | 5776.444332                    | 26.928                                                | $0.9135 \times 10^{-3}$             | $0.7926 \times 10^{-3}$             | 15.249         | 7     | $F_2$ | 2          | 6    | $F_1$ | 156       |
| 5776.508255                    | 5776.482351                    | 25.904                                                | $0.3459 \times 10^{-4}$             | $0.3951 \times 10^{-4}$             | -12.462        | 7     | $F_2$ | 1          | 6    | $F_1$ | 156       |
| 5776.701170                    | 5776.692725                    | 8.445                                                 |                                     | $0.1293 \times 10^{-4}$             |                | 9     | $E$   | 1          | 9    | $E$   | 130       |
| 5777.158694                    | 5777.131704                    | 26.990                                                |                                     | $0.1759 \times 10^{-2}$             |                | 8     | $A_1$ | 1          | 7    | $A_2$ | 67        |
| 5777.381171                    | 5777.390815                    | -9.644                                                | $0.4389 \times 10^{-2}$             | $0.5217 \times 10^{-2}$             | -15.866        | 4     | $A_1$ | 1          | 3    | $A_2$ | 29        |
| 5778.158897                    | 5778.144812                    | 14.085                                                | $0.3124 \times 10^{-2}$             | $0.3242 \times 10^{-2}$             | -3.642         | 4     | $F_1$ | 1          | 3    | $F_2$ | 77        |
| 5778.338725                    | 5778.347140                    | -8.415                                                | $0.1604 \times 10^{-3}$             | $0.1640 \times 10^{-3}$             | -2.213         | 6     | $F_1$ | 1          | 5    | $F_2$ | 128       |
| 5778.380764                    | 5778.384522                    | -3.758                                                | $0.7899 \times 10^{-3}$             | $0.8406 \times 10^{-3}$             | -6.029         | 4     | $E$   | 1          | 3    | $E$   | 51        |
| 5778.698510                    | 5778.709312                    | -10.802                                               |                                     | $0.2418 \times 10^{-4}$             |                | 10    | $F_1$ | 2          | 10   | $F_2$ | 223       |
| 5778.774040                    | 5778.784792                    | -10.752                                               | $0.1388 \times 10^{-3}$             | $0.1149 \times 10^{-3}$             | 20.807         | 10    | $F_1$ | 1          | 10   | $F_2$ | 223       |
| 5778.884145                    | 5778.875072                    | 9.073                                                 | $0.2786 \times 10^{-2}$             | $0.2763 \times 10^{-2}$             | 0.845          | 7     | $A_2$ | 1          | 6    | $A_1$ | 56        |
| 5779.037280                    | 5779.019475                    | 17.805                                                |                                     | $0.7084 \times 10^{-5}$             |                | 5     | $F_2$ | 1          | 4    | $F_1$ | 101       |
| 5779.436317                    | 5779.441155                    | -4.838                                                |                                     | $0.4042 \times 10^{-3}$             |                | 7     | $E$   | 1          | 6    | $E$   | 109       |
| 5779.608798                    | 5779.574779                    | 34.019                                                | $0.5820 \times 10^{-3}$             | $0.5213 \times 10^{-3}$             | 11.654         | 7     | $F_2$ | 2          | 6    | $F_1$ | 158       |
| 5779.644472                    | 5779.612798                    | 31.674                                                |                                     | $0.1184 \times 10^{-4}$             |                | 7     | $F_2$ | 1          | 6    | $F_1$ | 158       |
| 5779.911352                    | 5779.902768                    | 8.584                                                 |                                     | $0.1830 \times 10^{-3}$             |                | 5     | $F_1$ | 2          | 4    | $F_2$ | 105       |
| 5779.927000                    | 5779.917348                    | 9.652                                                 |                                     | $0.1213 \times 10^{-4}$             |                | 5     | $F_1$ | 1          | 4    | $F_2$ | 105       |
| 5780.492200                    | 5780.479564                    | 12.636                                                |                                     | $0.1487 \times 10^{-3}$             |                | 5     | $E$   | 1          | 4    | $E$   | 71        |
| 5780.780250                    | 5780.803285                    | -23.035                                               | $0.9920 \times 10^{-4}$             | $0.1039 \times 10^{-3}$             | -4.525         | 3     | $F_2$ | 1          | 2    | $F_1$ | 50        |
| 5780.854850                    | 5780.870782                    | -15.932                                               |                                     | $0.4291 \times 10^{-4}$             |                | 4     | $F_2$ | 1          | 3    | $F_1$ | 81        |
| 5781.084020                    | 5781.070355                    | 13.665                                                | $0.3990 \times 10^{-3}$             | $0.3792 \times 10^{-3}$             | 5.211          | 5     | $F_2$ | 1          | 4    | $F_1$ | 102       |
| 5781.609811                    | 5781.600493                    | 9.318                                                 | $0.1032 \times 10^{-2}$             | $0.9744 \times 10^{-3}$             | 5.910          | 4     | $E$   | 1          | 3    | $E$   | 52        |
| 5781.847970                    | 5781.844223                    | 3.747                                                 | $0.9282 \times 10^{-4}$             | $0.9623 \times 10^{-4}$             | -3.548         | 3     | $F_1$ | 1          | 2    | $F_2$ | 56        |
| 5782.332390                    | 5782.340166                    | -7.776                                                | $0.3572 \times 10^{-4}$             | $0.4009 \times 10^{-4}$             | -10.890        | 6     | $F_2$ | 2          | 5    | $F_1$ | 136       |
| 5782.402470                    | 5782.404498                    | -2.028                                                | $0.1505 \times 10^{-3}$             | $0.1264 \times 10^{-3}$             | 19.034         | 7     | $F_1$ | 2          | 6    | $F_2$ | 166       |
| 5782.457510                    | 5782.460188                    | -2.678                                                |                                     | $0.2331 \times 10^{-4}$             |                | 7     | $F_1$ | 1          | 6    | $F_2$ | 166       |
| 5782.485360                    | 5782.510399                    | -25.039                                               |                                     | $0.7436 \times 10^{-4}$             |                | 8     | $F_1$ | 2          | 8    | $F_2$ | 180       |
| 5782.556020                    | 5782.581457                    | -25.437                                               |                                     | $0.5826 \times 10^{-3}$             |                | 8     | $F_1$ | 1          | 8    | $F_2$ | 180       |
| 5782.772608                    | 5782.777517                    | -4.909                                                | $0.1899 \times 10^{-3}$             | $0.1502 \times 10^{-3}$             | 26.422         | 6     | $F_1$ | 1          | 5    | $F_2$ | 129       |
| 5782.815139                    | 5782.813867                    | 1.272                                                 | $0.1471 \times 10^{-2}$             | $0.1651 \times 10^{-2}$             | -10.895        | 8     | $A_1$ | 1          | 8    | $A_2$ | 58        |

Table II (continued).

| $\tilde{\nu}_e/\text{cm}^{-1}$ | $\tilde{\nu}_c/\text{cm}^{-1}$ | $\tilde{\nu}_e - \tilde{\nu}_c/10^{-3}\text{cm}^{-1}$ | $I_e/\text{cm}^{-2}\text{atm}^{-1}$ | $I_c/\text{cm}^{-2}\text{atm}^{-1}$ | $I_e - I_c/\%$ | $J''$ | $C''$ | $\alpha''$ | $J'$ | $C'$  | $\alpha'$ |
|--------------------------------|--------------------------------|-------------------------------------------------------|-------------------------------------|-------------------------------------|----------------|-------|-------|------------|------|-------|-----------|
| 5783.019560                    | 5783.006060                    | 13.500                                                | $0.1658 \times 10^{-2}$             | $0.1424 \times 10^{-2}$             | 16.442         | 6     | $A_1$ | 1          | 5    | $A_2$ | 46        |
| 5783.100348                    | 5783.080603                    | 19.745                                                |                                     | $0.4884 \times 10^{-4}$             |                | 5     | $F_1$ | 1          | 4    | $F_2$ | 106       |
| 5784.188080                    | 5784.180386                    | 7.694                                                 | $0.2432 \times 10^{-2}$             | $0.1833 \times 10^{-2}$             | 32.649         | 6     | $A_1$ | 1          | 5    | $A_2$ | 47        |
| 5784.301249                    | 5784.335263                    | -34.014                                               | $0.1241 \times 10^{-2}$             | $0.1296 \times 10^{-2}$             | -4.245         | 6     | $F_1$ | 1          | 5    | $F_2$ | 130       |
| 5784.612470                    | 5784.584755                    | 27.715                                                |                                     | $0.1142 \times 10^{-5}$             |                | 5     | $E$   | 1          | 4    | $E$   | 72        |
| 5784.708963                    | 5784.693202                    | 15.761                                                |                                     | $0.7046 \times 10^{-5}$             |                | 5     | $F_1$ | 2          | 4    | $F_2$ | 107       |
| 5784.723000                    | 5784.707783                    | 15.217                                                |                                     | $0.5269 \times 10^{-5}$             |                | 5     | $F_1$ | 1          | 4    | $F_2$ | 107       |
| 5785.240924                    | 5785.237245                    | 3.679                                                 | $0.2725 \times 10^{-2}$             | $0.2723 \times 10^{-2}$             | 0.070          | 4     | $F_2$ | 1          | 3    | $F_1$ | 82        |
| 5785.322846                    | 5785.318173                    | 4.673                                                 |                                     | $0.4622 \times 10^{-4}$             |                | 7     | $F_2$ | 2          | 6    | $F_1$ | 161       |
| 5785.359990                    | 5785.356192                    | 3.798                                                 |                                     | $0.6949 \times 10^{-3}$             |                | 7     | $F_2$ | 1          | 6    | $F_1$ | 161       |
| 5786.435417                    | 5786.453183                    | -17.766                                               | $0.1683 \times 10^{-2}$             | $0.1645 \times 10^{-2}$             | 2.329          | 6     | $F_2$ | 2          | 5    | $F_1$ | 138       |
| 5786.457949                    | 5786.474900                    | -16.951                                               | $0.1480 \times 10^{-3}$             | $0.1055 \times 10^{-3}$             | 40.332         | 6     | $F_2$ | 1          | 5    | $F_1$ | 138       |
| 5786.969083                    | 5786.980665                    | -11.582                                               | $0.1812 \times 10^{-2}$             | $0.1841 \times 10^{-2}$             | -1.565         | 3     | $F_1$ | 1          | 2    | $F_2$ | 57        |
| 5787.237000                    | 5787.251540                    | -14.540                                               |                                     | $0.1901 \times 10^{-4}$             |                | 4     | $F_2$ | 1          | 3    | $F_1$ | 83        |
| 5787.258810                    | 5787.261359                    | -2.549                                                |                                     | $0.4508 \times 10^{-4}$             |                | 7     | $F_2$ | 1          | 6    | $F_1$ | 162       |
| 5787.332890                    | 5787.320241                    | 12.649                                                | $0.6953 \times 10^{-4}$             | $0.6785 \times 10^{-4}$             | 2.472          | 7     | $F_1$ | 1          | 6    | $F_2$ | 168       |
| 5787.397400                    | 5787.406648                    | -9.248                                                |                                     | $0.1383 \times 10^{-3}$             |                | 6     | $F_1$ | 1          | 5    | $F_2$ | 132       |
| 5787.878660                    | 5787.849796                    | 28.864                                                | $0.5473 \times 10^{-4}$             | $0.3762 \times 10^{-4}$             | 45.475         | 3     | $F_1$ | 1          | 2    | $F_2$ | 58        |
| 5788.049000                    | 5787.983563                    | 65.437                                                |                                     | $0.2277 \times 10^{-4}$             |                | 7     | $F_1$ | 2          | 7    | $F_2$ | 158       |
| 5788.103653                    | 5788.039254                    | 64.399                                                | $0.1145 \times 10^{-2}$             | $0.1163 \times 10^{-2}$             | -1.546         | 7     | $F_1$ | 1          | 7    | $F_2$ | 158       |
| 5788.055000                    | 5788.058312                    | -3.312                                                |                                     | $0.4956 \times 10^{-4}$             |                | 5     | $F_1$ | 2          | 4    | $F_2$ | 108       |
| 5788.067520                    | 5788.072892                    | -5.372                                                | $0.1818 \times 10^{-3}$             | $0.2010 \times 10^{-3}$             | -9.564         | 5     | $F_1$ | 1          | 4    | $F_2$ | 108       |
| 5788.220882                    | 5788.199612                    | 21.270                                                | $0.2845 \times 10^{-3}$             | $0.2865 \times 10^{-3}$             | -0.689         | 5     | $F_2$ | 1          | 4    | $F_1$ | 104       |
| 5788.287489                    | 5788.252064                    | 35.425                                                | $0.2063 \times 10^{-2}$             | $0.2044 \times 10^{-2}$             | 0.953          | 3     | $F_2$ | 1          | 2    | $F_1$ | 51        |
| 5789.026487                    | 5789.027696                    | -1.209                                                |                                     | $0.1629 \times 10^{-3}$             |                | 7     | $F_2$ | 2          | 7    | $F_1$ | 163       |
| 5789.064475                    | 5789.065715                    | -1.240                                                | $0.1624 \times 10^{-2}$             | $0.1445 \times 10^{-2}$             | 12.351         | 7     | $F_2$ | 1          | 7    | $F_1$ | 163       |
| 5789.205031                    | 5789.145336                    | 59.695                                                | $0.3875 \times 10^{-2}$             | $0.4250 \times 10^{-2}$             | -8.832         | 3     | $A_2$ | 1          | 2    | $A_1$ | 21        |
| 5789.423030                    | 5789.437907                    | -14.877                                               | $0.1527 \times 10^{-3}$             | $0.1408 \times 10^{-3}$             | 8.432          | 6     | $E$   | 1          | 5    | $E$   | 90        |
| 5789.525500                    | 5789.518676                    | 6.824                                                 | $0.2194 \times 10^{-3}$             | $0.1880 \times 10^{-3}$             | 16.710         | 6     | $F_2$ | 1          | 5    | $F_1$ | 139       |
| 5789.577640                    | 5789.655881                    | -78.241                                               |                                     | $0.4813 \times 10^{-3}$             |                | 7     | $A_2$ | 1          | 7    | $A_1$ | 51        |
| 5789.775610                    | 5789.755954                    | 19.656                                                |                                     | $0.2149 \times 10^{-3}$             |                | 7     | $F_2$ | 2          | 7    | $F_1$ | 164       |
| 5789.813200                    | 5789.793973                    | 19.227                                                |                                     | $0.8718 \times 10^{-4}$             |                | 7     | $F_2$ | 1          | 7    | $F_1$ | 164       |
| 5790.272000                    | 5790.264260                    | 7.740                                                 |                                     | $0.3893 \times 10^{-2}$             |                | 6     | $A_1$ | 1          | 6    | $A_2$ | 45        |
| 5790.410403                    | 5790.400050                    | 10.353                                                | $0.1957 \times 10^{-3}$             | $0.2042 \times 10^{-3}$             | -4.142         | 4     | $F_2$ | 1          | 3    | $F_1$ | 84        |
| 5790.387670                    | 5790.404059                    | -16.389                                               | $0.2291 \times 10^{-2}$             | $0.2036 \times 10^{-2}$             | 12.545         | 6     | $F_1$ | 1          | 6    | $F_2$ | 140       |
| 5790.448142                    | 5790.444367                    | 3.775                                                 | $0.1976 \times 10^{-2}$             | $0.1817 \times 10^{-2}$             | 8.729          | 6     | $F_2$ | 2          | 6    | $F_1$ | 134       |
| 5791.455000                    | 5791.493733                    | -38.733                                               |                                     | $0.1315 \times 10^{-4}$             |                | 6     | $F_2$ | 2          | 5    | $F_1$ | 140       |
| 5791.477750                    | 5791.515450                    | -37.700                                               | $0.1426 \times 10^{-2}$             | $0.1268 \times 10^{-2}$             | 12.470         | 6     | $F_2$ | 1          | 5    | $F_1$ | 140       |
| 5791.781300                    | 5791.780396                    | 0.904                                                 | $0.3961 \times 10^{-3}$             | $0.4278 \times 10^{-3}$             | -7.418         | 3     | $F_2$ | 1          | 2    | $F_1$ | 52        |
| 5792.164330                    | 5792.173038                    | -8.708                                                | $0.4171 \times 10^{-3}$             | $0.4247 \times 10^{-3}$             | -1.790         | 4     | $E$   | 1          | 3    | $E$   | 53        |
| 5792.250490                    | 5792.232205                    | 18.285                                                |                                     | $0.2429 \times 10^{-3}$             |                | 9     | $A_1$ | 1          | 9    | $A_2$ | 70        |
| 5792.386046                    | 5792.409787                    | -23.741                                               |                                     | $0.1616 \times 10^{-3}$             |                | 6     | $F_1$ | 1          | 6    | $F_2$ | 141       |
| 5792.417487                    | 5792.416644                    | 0.843                                                 | $0.1107 \times 10^{-2}$             | $0.9662 \times 10^{-3}$             | 14.568         | 6     | $E$   | 1          | 5    | $E$   | 91        |
| 5792.575384                    | 5792.575264                    | 0.120                                                 | $0.4648 \times 10^{-4}$             | $0.6318 \times 10^{-4}$             | -26.438        | 7     | $E$   | 1          | 6    | $E$   | 114       |
| 5792.577000                    | 5792.575264                    | 1.736                                                 |                                     | $0.6318 \times 10^{-4}$             |                | 7     | $E$   | 1          | 6    | $E$   | 114       |
| 5792.799615                    | 5792.749334                    | 50.281                                                | $0.6691 \times 10^{-3}$             | $0.6874 \times 10^{-3}$             | -2.662         | 6     | $E$   | 1          | 6    | $E$   | 93        |
| 5792.747740                    | 5792.753802                    | -6.062                                                |                                     | $0.9293 \times 10^{-4}$             |                | 6     | $A_1$ | 1          | 5    | $A_2$ | 49        |
| 5792.902165                    | 5792.898762                    | 3.403                                                 | $0.1989 \times 10^{-2}$             | $0.1925 \times 10^{-2}$             | 3.306          | 3     | $F_1$ | 1          | 2    | $F_2$ | 59        |
| 5793.107143                    | 5793.104650                    | 2.493                                                 | $0.3679 \times 10^{-3}$             | $0.3140 \times 10^{-3}$             | 17.173         | 6     | $F_2$ | 2          | 6    | $F_1$ | 135       |
| 5793.129032                    | 5793.126367                    | 2.665                                                 | $0.1248 \times 10^{-2}$             | $0.1256 \times 10^{-2}$             | -0.622         | 6     | $F_2$ | 1          | 6    | $F_1$ | 135       |

Table II (continued).

| $\tilde{\nu}_e/\text{cm}^{-1}$ | $\tilde{\nu}_c/\text{cm}^{-1}$ | $\tilde{\nu}_e - \tilde{\nu}_c/10^{-3}\text{cm}^{-1}$ | $I_e/\text{cm}^{-2}\text{atm}^{-1}$ | $I_c/\text{cm}^{-2}\text{atm}^{-1}$ | $I_e - I_c/\%$ | $J''$ | $C''$ | $\alpha''$ | $J'$ | $C'$  | $\alpha'$ |
|--------------------------------|--------------------------------|-------------------------------------------------------|-------------------------------------|-------------------------------------|----------------|-------|-------|------------|------|-------|-----------|
| 5793.156761                    | 5793.195968                    | -39.207                                               | $0.1661 \times 10^{-2}$             | $0.1511 \times 10^{-2}$             | 9.961          | 5     | $F_1$ | 2          | 4    | $F_2$ | 109       |
| 5793.250265                    | 5793.237212                    | 13.053                                                | $0.4819 \times 10^{-3}$             | $0.4231 \times 10^{-3}$             | 13.900         | 4     | $F_1$ | 1          | 3    | $F_2$ | 80        |
| 5793.348903                    | 5793.335993                    | 12.910                                                | $0.8164 \times 10^{-4}$             | $0.7672 \times 10^{-4}$             | 6.412          | 7     | $F_2$ | 2          | 6    | $F_1$ | 167       |
| 5793.390058                    | 5793.458804                    | -68.746                                               |                                     | $0.1043 \times 10^{-2}$             |                | 5     | $E$   | 1          | 4    | $E$   | 73        |
| 5793.644300                    | 5793.677677                    | -33.377                                               | $0.3890 \times 10^{-2}$             | $0.4054 \times 10^{-2}$             | -4.037         | 6     | $A_2$ | 1          | 6    | $A_1$ | 49        |
| 5793.772000                    | 5793.764485                    | 7.515                                                 |                                     | $0.3044 \times 10^{-4}$             |                | 5     | $F_1$ | 2          | 4    | $F_2$ | 110       |
| 5793.788450                    | 5793.779065                    | 9.385                                                 | $0.4183 \times 10^{-3}$             | $0.4090 \times 10^{-3}$             | 2.274          | 5     | $F_1$ | 1          | 4    | $F_2$ | 110       |
| 5794.197030                    | 5794.221737                    | -24.707                                               | $0.5089 \times 10^{-3}$             | $0.3939 \times 10^{-3}$             | 29.185         | 5     | $F_2$ | 1          | 4    | $F_1$ | 105       |
| 5794.258055                    | 5794.258290                    | -0.235                                                | $0.1791 \times 10^{-2}$             | $0.1227 \times 10^{-2}$             | 45.988         | 3     | $F_2$ | 1          | 2    | $F_1$ | 53        |
| 5794.673244                    | 5794.663474                    | 9.770                                                 | $0.3308 \times 10^{-3}$             | $0.2801 \times 10^{-3}$             | 18.080         | 6     | $F_2$ | 2          | 6    | $F_1$ | 136       |
| 5794.694762                    | 5794.685191                    | 9.571                                                 | $0.9585 \times 10^{-3}$             | $0.9212 \times 10^{-3}$             | 4.046          | 6     | $F_2$ | 1          | 6    | $F_1$ | 136       |
| 5794.877375                    | 5794.838009                    | 39.366                                                | $0.9167 \times 10^{-3}$             | $0.9566 \times 10^{-3}$             | -4.176         | 6     | $E$   | 1          | 6    | $E$   | 94        |
| 5794.937454                    | 5794.900716                    | 36.738                                                | $0.1914 \times 10^{-3}$             | $0.1732 \times 10^{-3}$             | 10.525         | 6     | $F_1$ | 1          | 6    | $F_2$ | 142       |
| 5795.011270                    | 5795.028093                    | -16.823                                               |                                     | $0.2065 \times 10^{-4}$             |                | 7     | $F_1$ | 2          | 7    | $F_2$ | 161       |
| 5795.066450                    | 5795.083784                    | -17.334                                               |                                     | $0.3020 \times 10^{-4}$             |                | 7     | $F_1$ | 1          | 7    | $F_2$ | 161       |
| 5795.201850                    | 5795.158456                    | 43.394                                                | $0.2125 \times 10^{-3}$             | $0.2056 \times 10^{-3}$             | 3.340          | 4     | $A_1$ | 1          | 3    | $A_2$ | 30        |
| 5795.368820                    | 5795.333659                    | 35.161                                                | $0.4690 \times 10^{-4}$             | $0.5262 \times 10^{-4}$             | -10.871        | 5     | $F_2$ | 1          | 4    | $F_1$ | 106       |
| 5795.553813                    | 5795.518129                    | 35.684                                                | $0.2853 \times 10^{-2}$             | $0.2824 \times 10^{-2}$             | 1.022          | 5     | $F_1$ | 2          | 5    | $F_2$ | 114       |
| 5795.565497                    | 5795.541609                    | 23.888                                                | $0.1679 \times 10^{-2}$             | $0.1710 \times 10^{-2}$             | -1.822         | 5     | $E$   | 1          | 5    | $E$   | 77        |
| 5795.758585                    | 5795.791310                    | -32.725                                               | $0.1135 \times 10^{-3}$             | $0.1033 \times 10^{-3}$             | 9.870          | 6     | $F_2$ | 2          | 6    | $F_1$ | 137       |
| 5795.780384                    | 5795.813026                    | -32.642                                               | $0.2782 \times 10^{-3}$             | $0.2534 \times 10^{-3}$             | 9.795          | 6     | $F_2$ | 1          | 6    | $F_1$ | 137       |
| 5795.950786                    | 5795.951729                    | -0.943                                                | $0.9661 \times 10^{-3}$             | $0.9892 \times 10^{-3}$             | -2.335         | 7     | $A_2$ | 1          | 7    | $A_1$ | 52        |
| 5796.036000                    | 5796.040789                    | -4.789                                                |                                     | $0.3674 \times 10^{-4}$             |                | 5     | $F_1$ | 2          | 4    | $F_2$ | 111       |
| 5796.051463                    | 5796.055369                    | -3.906                                                | $0.2845 \times 10^{-3}$             | $0.2696 \times 10^{-3}$             | 5.523          | 5     | $F_1$ | 1          | 4    | $F_2$ | 111       |
| 5796.168750                    | 5796.207274                    | -38.524                                               |                                     | $0.7441 \times 10^{-5}$             |                | 6     | $F_1$ | 1          | 5    | $F_2$ | 136       |
| 5796.296160                    | 5796.243617                    | 52.543                                                |                                     | $0.3985 \times 10^{-4}$             |                | 6     | $E$   | 1          | 5    | $E$   | 93        |
| 5796.468120                    | 5796.479092                    | -10.972                                               |                                     | $0.8465 \times 10^{-4}$             |                | 8     | $F_1$ | 2          | 8    | $F_2$ | 188       |
| 5796.538560                    | 5796.550150                    | -11.590                                               | $0.1533 \times 10^{-3}$             | $0.1322 \times 10^{-3}$             | 15.928         | 8     | $F_1$ | 1          | 8    | $F_2$ | 188       |
| 5796.566300                    | 5796.552091                    | 14.209                                                | $0.2337 \times 10^{-3}$             | $0.2215 \times 10^{-3}$             | 5.492          | 7     | $F_2$ | 2          | 7    | $F_1$ | 166       |
| 5796.604040                    | 5796.590109                    | 13.931                                                | $0.3227 \times 10^{-3}$             | $0.3243 \times 10^{-3}$             | -0.502         | 7     | $F_2$ | 1          | 7    | $F_1$ | 166       |
| 5797.171466                    | 5797.166427                    | 5.039                                                 | $0.2833 \times 10^{-2}$             | $0.3139 \times 10^{-2}$             | -9.747         | 3     | $A_2$ | 1          | 2    | $A_1$ | 22        |
| 5797.212320                    | 5797.225116                    | -12.796                                               |                                     | $0.8441 \times 10^{-5}$             |                | 6     | $E$   | 1          | 5    | $E$   | 94        |
| 5797.403800                    | 5797.409831                    | -6.031                                                | $0.3956 \times 10^{-3}$             | $0.2845 \times 10^{-3}$             | 39.057         | 5     | $F_1$ | 2          | 4    | $F_2$ | 112       |
| 5797.423000                    | 5797.438008                    | -15.008                                               |                                     | $0.3052 \times 10^{-3}$             |                | 5     | $F_1$ | 2          | 5    | $F_2$ | 115       |
| 5797.439263                    | 5797.452588                    | -13.325                                               | $0.7129 \times 10^{-3}$             | $0.7121 \times 10^{-3}$             | 0.112          | 5     | $F_1$ | 1          | 5    | $F_2$ | 115       |
| 5797.906756                    | 5797.897788                    | 8.968                                                 | $0.2303 \times 10^{-2}$             | $0.2297 \times 10^{-2}$             | 0.278          | 5     | $F_2$ | 1          | 5    | $F_1$ | 120       |
| 5797.973979                    | 5797.966866                    | 7.113                                                 | $0.1724 \times 10^{-3}$             | $0.1443 \times 10^{-3}$             | 19.435         | 4     | $F_1$ | 1          | 3    | $F_2$ | 81        |
| 5798.224980                    | 5798.208653                    | 16.327                                                | $0.1057 \times 10^{-3}$             | $0.1088 \times 10^{-3}$             | -2.875         | 4     | $E$   | 1          | 3    | $E$   | 54        |
| 5798.626784                    | 5798.634012                    | -7.228                                                | $0.1020 \times 10^{-2}$             | $0.1022 \times 10^{-2}$             | -0.150         | 2     | $E$   | 1          | 1    | $E$   | 21        |
| 5798.680423                    | 5798.662125                    | 18.298                                                | $0.1234 \times 10^{-2}$             | $0.1147 \times 10^{-2}$             | 7.580          | 5     | $F_2$ | 1          | 4    | $F_1$ | 107       |
| 5799.081820                    | 5799.072476                    | 9.344                                                 | $0.4939 \times 10^{-4}$             | $0.6316 \times 10^{-4}$             | -21.803        | 3     | $F_1$ | 1          | 2    | $F_2$ | 60        |
| 5799.152207                    | 5799.158388                    | -6.181                                                | $0.1351 \times 10^{-2}$             | $0.1256 \times 10^{-2}$             | 7.568          | 5     | $F_1$ | 1          | 4    | $F_2$ | 113       |
| 5799.313460                    | 5799.340797                    | -27.337                                               | $0.6050 \times 10^{-3}$             | $0.4863 \times 10^{-3}$             | 24.397         | 5     | $E$   | 1          | 5    | $E$   | 78        |
| 5799.466580                    | 5799.471956                    | -5.376                                                | $0.6843 \times 10^{-3}$             | $0.7005 \times 10^{-3}$             | -2.309         | 5     | $F_2$ | 1          | 5    | $F_1$ | 121       |
| 5799.923503                    | 5799.921096                    | 2.407                                                 | $0.2498 \times 10^{-2}$             | $0.2484 \times 10^{-2}$             | 0.546          | 5     | $F_1$ | 1          | 5    | $F_2$ | 116       |
| 5800.215630                    | 5800.182946                    | 32.684                                                |                                     | $0.5306 \times 10^{-4}$             |                | 7     | $F_2$ | 2          | 7    | $F_1$ | 167       |
| 5800.732360                    | 5800.744703                    | -12.343                                               |                                     | $0.6323 \times 10^{-4}$             |                | 7     | $F_2$ | 2          | 7    | $F_1$ | 168       |
| 5800.771430                    | 5800.782722                    | -11.292                                               |                                     | $0.5659 \times 10^{-3}$             |                | 7     | $F_2$ | 1          | 7    | $F_1$ | 168       |
| 5800.835404                    | 5800.830991                    | 4.413                                                 | $0.2926 \times 10^{-2}$             | $0.3113 \times 10^{-2}$             | -6.017         | 4     | $F_2$ | 1          | 4    | $F_1$ | 93        |
| 5801.211885                    | 5801.201159                    | 10.726                                                | $0.2542 \times 10^{-2}$             | $0.2232 \times 10^{-2}$             | 13.887         | 2     | $F_2$ | 1          | 1    | $F_1$ | 36        |



Table II (continued).

| $\tilde{\nu}_e/\text{cm}^{-1}$ | $\tilde{\nu}_c/\text{cm}^{-1}$ | $\tilde{\nu}_e - \tilde{\nu}_c/10^{-3}\text{cm}^{-1}$ | $I_e/\text{cm}^{-2}\text{atm}^{-1}$ | $I_c/\text{cm}^{-2}\text{atm}^{-1}$ | $I_e - I_c/\%$ | $J''$ | $C''$ | $\alpha''$ | $J'$ | $C'$  | $\alpha'$ |
|--------------------------------|--------------------------------|-------------------------------------------------------|-------------------------------------|-------------------------------------|----------------|-------|-------|------------|------|-------|-----------|
| 5801.599730                    | 5801.601573                    | -1.843                                                | $0.1024 \times 10^{-3}$             | $0.9791 \times 10^{-4}$             | 4.583          | 5     | $F_2$ | 1          | 5    | $F_1$ | 122       |
| 5801.689929                    | 5801.706334                    | -16.405                                               | $0.7447 \times 10^{-3}$             | $0.7720 \times 10^{-3}$             | -3.536         | 3     | $F_2$ | 1          | 2    | $F_1$ | 54        |
| 5801.838207                    | 5801.821304                    | 16.903                                                | $0.2398 \times 10^{-2}$             | $0.2422 \times 10^{-2}$             | -0.985         | 4     | $A_1$ | 1          | 3    | $A_2$ | 31        |
| 5801.907963                    | 5801.899132                    | 8.831                                                 |                                     | $0.4167 \times 10^{-5}$             |                | 5     | $F_1$ | 2          | 4    | $F_2$ | 114       |
| 5801.941880                    | 5801.936637                    | 5.243                                                 |                                     | $0.9025 \times 10^{-4}$             |                | 6     | $F_1$ | 1          | 6    | $F_2$ | 144       |
| 5802.082778                    | 5802.106460                    | -23.682                                               | $0.9120 \times 10^{-3}$             | $0.9458 \times 10^{-3}$             | -3.578         | 4     | $F_1$ | 1          | 4    | $F_2$ | 97        |
| 5802.140710                    | 5802.174283                    | -33.573                                               | $0.8631 \times 10^{-4}$             | $0.8497 \times 10^{-4}$             | 1.580          | 5     | $F_1$ | 2          | 5    | $F_2$ | 117       |
| 5802.153590                    | 5802.188863                    | -35.273                                               | $0.3400 \times 10^{-4}$             | $0.3709 \times 10^{-4}$             | -8.331         | 5     | $F_1$ | 1          | 5    | $F_2$ | 117       |
| 5802.501857                    | 5802.530842                    | -28.985                                               | $0.1352 \times 10^{-2}$             | $0.1348 \times 10^{-2}$             | 0.271          | 4     | $F_2$ | 1          | 3    | $F_1$ | 86        |
| 5802.616932                    | 5802.616710                    | 0.222                                                 | $0.2133 \times 10^{-2}$             | $0.2128 \times 10^{-2}$             | 0.228          | 4     | $E$   | 1          | 4    | $E$   | 65        |
| 5802.714400                    | 5802.706760                    | 7.640                                                 |                                     | $0.1152 \times 10^{-3}$             |                | 5     | $F_2$ | 1          | 4    | $F_1$ | 109       |
| 5802.750843                    | 5802.774004                    | -23.161                                               | $0.1376 \times 10^{-2}$             | $0.1079 \times 10^{-2}$             | 27.486         | 4     | $F_1$ | 1          | 3    | $F_2$ | 82        |
| 5803.185170                    | 5803.214798                    | -29.628                                               | $0.5933 \times 10^{-3}$             | $0.5996 \times 10^{-3}$             | -1.053         | 4     | $E$   | 1          | 3    | $E$   | 55        |
| 5803.354446                    | 5803.335816                    | 18.630                                                | $0.8034 \times 10^{-3}$             | $0.7456 \times 10^{-3}$             | 7.749          | 2     | $F_2$ | 1          | 1    | $F_1$ | 37        |
| 5803.793720                    | 5803.795619                    | -1.899                                                | $0.4205 \times 10^{-3}$             | $0.3913 \times 10^{-3}$             | 7.450          | 4     | $F_2$ | 1          | 4    | $F_1$ | 94        |
| 5803.960000                    | 5803.991694                    | -31.694                                               |                                     | $0.1691 \times 10^{-3}$             |                | 6     | $F_1$ | 1          | 6    | $F_2$ | 145       |
| 5803.979500                    | 5803.995910                    | -16.410                                               |                                     | $0.6289 \times 10^{-3}$             |                | 6     | $F_2$ | 1          | 6    | $F_1$ | 139       |
| 5804.054410                    | 5804.091291                    | -36.881                                               | $0.3591 \times 10^{-3}$             | $0.3506 \times 10^{-3}$             | 2.431          | 6     | $E$   | 1          | 6    | $E$   | 97        |
| 5804.308905                    | 5804.322489                    | -13.584                                               | $0.2525 \times 10^{-2}$             | $0.2632 \times 10^{-2}$             | -4.074         | 4     | $F_1$ | 1          | 4    | $F_2$ | 98        |
| 5804.384916                    | 5804.360892                    | 24.024                                                | $0.1385 \times 10^{-2}$             | $0.1511 \times 10^{-2}$             | -8.353         | 6     | $A_2$ | 1          | 6    | $A_1$ | 50        |
| 5804.609120                    | 5804.585413                    | 23.707                                                | $0.6830 \times 10^{-3}$             | $0.6653 \times 10^{-3}$             | 2.656          | 3     | $F_1$ | 1          | 2    | $F_2$ | 61        |
| 5804.968469                    | 5804.984358                    | -15.889                                               | $0.6764 \times 10^{-2}$             | $0.6568 \times 10^{-2}$             | 2.983          | 4     | $A_1$ | 1          | 4    | $A_2$ | 30        |
| 5805.716280                    | 5805.742256                    | -25.976                                               |                                     | $0.3482 \times 10^{-4}$             |                | 6     | $A_1$ | 1          | 5    | $A_2$ | 51        |
| 5805.785000                    | 5805.758458                    | 26.542                                                |                                     | $0.6687 \times 10^{-4}$             |                | 6     | $F_1$ | 1          | 6    | $F_2$ | 146       |
| 5805.925080                    | 5805.878511                    | 46.569                                                |                                     | $0.6834 \times 10^{-4}$             |                | 4     | $F_2$ | 1          | 4    | $F_1$ | 95        |
| 5805.983400                    | 5805.983621                    | -0.221                                                | $0.3878 \times 10^{-4}$             | $0.3594 \times 10^{-4}$             | 7.902          | 6     | $F_2$ | 2          | 6    | $F_1$ | 141       |
| 5806.122597                    | 5806.139501                    | -16.904                                               | $0.5950 \times 10^{-2}$             | $0.5784 \times 10^{-2}$             | 2.872          | 3     | $A_2$ | 1          | 3    | $A_1$ | 22        |
| 5806.184000                    | 5806.185039                    | -1.039                                                | $0.2446 \times 10^{-4}$             | $0.2287 \times 10^{-4}$             | 6.937          | 4     | $F_1$ | 1          | 3    | $F_2$ | 83        |
| 5806.476276                    | 5806.458773                    | 17.503                                                | $0.1259 \times 10^{-2}$             | $0.1330 \times 10^{-2}$             | -5.373         | 2     | $E$   | 1          | 1    | $E$   | 22        |
| 5806.923632                    | 5806.942422                    | -18.790                                               | $0.2486 \times 10^{-2}$             | $0.2515 \times 10^{-2}$             | -1.168         | 3     | $F_2$ | 1          | 3    | $F_1$ | 77        |
| 5807.072630                    | 5807.100648                    | -28.018                                               | $0.3594 \times 10^{-4}$             | $0.2112 \times 10^{-4}$             | 70.206         | 5     | $F_1$ | 2          | 4    | $F_2$ | 118       |
| 5808.028000                    | 5808.003188                    | 24.812                                                |                                     | $0.4156 \times 10^{-4}$             |                | 5     | $F_1$ | 2          | 4    | $F_2$ | 119       |
| 5808.043000                    | 5808.067968                    | -24.968                                               | $0.2202 \times 10^{-3}$             | $0.2408 \times 10^{-3}$             | -8.558         | 5     | $F_1$ | 2          | 5    | $F_2$ | 119       |
| 5808.060000                    | 5808.082549                    | -22.549                                               | $0.4281 \times 10^{-3}$             | $0.3928 \times 10^{-3}$             | 8.975          | 5     | $F_1$ | 1          | 5    | $F_2$ | 119       |
| 5808.602410                    | 5808.568136                    | 34.274                                                |                                     | $0.1033 \times 10^{-4}$             |                | 4     | $F_1$ | 1          | 3    | $F_2$ | 84        |
| 5808.575370                    | 5808.640373                    | -65.003                                               |                                     | $0.1128 \times 10^{-4}$             |                | 4     | $F_2$ | 1          | 3    | $F_1$ | 88        |
| 5808.874896                    | 5808.890374                    | -15.478                                               | $0.3205 \times 10^{-2}$             | $0.3430 \times 10^{-2}$             | -6.551         | 3     | $F_1$ | 1          | 3    | $F_2$ | 73        |
| 5809.155033                    | 5809.157404                    | -2.371                                                | $0.9698 \times 10^{-3}$             | $0.9350 \times 10^{-3}$             | 3.725          | 3     | $F_2$ | 1          | 3    | $F_1$ | 78        |
| 5809.645410                    | 5809.705346                    | -59.936                                               |                                     | $0.6152 \times 10^{-3}$             |                | 4     | $A_1$ | 1          | 3    | $A_2$ | 32        |
| 5809.851070                    | 5809.824243                    | 26.827                                                | $0.4291 \times 10^{-3}$             | $0.4296 \times 10^{-3}$             | -0.110         | 3     | $F_1$ | 1          | 2    | $F_2$ | 62        |
| 5810.459960                    | 5810.452483                    | 7.477                                                 |                                     | $0.2722 \times 10^{-3}$             |                | 2     | $F_2$ | 1          | 1    | $F_1$ | 38        |
| 5810.635480                    | 5810.648190                    | -12.710                                               |                                     | $0.1111 \times 10^{-4}$             |                | 5     | $F_2$ | 1          | 5    | $F_1$ | 126       |
| 5810.742040                    | 5810.679993                    | 62.047                                                | $0.2303 \times 10^{-3}$             | $0.2510 \times 10^{-3}$             | -8.233         | 3     | $F_1$ | 1          | 3    | $F_2$ | 74        |
| 5810.846660                    | 5810.819596                    | 27.064                                                | $0.2987 \times 10^{-3}$             | $0.2928 \times 10^{-3}$             | 2.005          | 4     | $F_2$ | 1          | 4    | $F_1$ | 96        |
| 5810.933340                    | 5810.917116                    | 16.224                                                | $0.8183 \times 10^{-3}$             | $0.8066 \times 10^{-3}$             | 1.454          | 4     | $F_1$ | 1          | 4    | $F_2$ | 99        |
| 5811.469251                    | 5811.436956                    | 32.295                                                | $0.1373 \times 10^{-2}$             | $0.1360 \times 10^{-2}$             | 0.981          | 4     | $A_1$ | 1          | 4    | $A_2$ | 31        |
| 5811.704285                    | 5811.673789                    | 30.496                                                | $0.1353 \times 10^{-2}$             | $0.1363 \times 10^{-2}$             | -0.760         | 3     | $A_2$ | 1          | 2    | $A_1$ | 23        |
| 5811.817000                    | 5811.820552                    | -3.552                                                |                                     | $0.5554 \times 10^{-3}$             |                | 3     | $F_2$ | 1          | 2    | $F_1$ | 56        |
| 5811.826000                    | 5811.834083                    | -8.083                                                | $0.6116 \times 10^{-3}$             | $0.7514 \times 10^{-3}$             | -18.606        | 4     | $E$   | 1          | 4    | $E$   | 67        |
| 5812.215543                    | 5812.237731                    | -22.188                                               | $0.2772 \times 10^{-2}$             | $0.2891 \times 10^{-2}$             | -4.115         | 2     | $F_2$ | 1          | 2    | $F_1$ | 50        |

Table II (continued).

| $\tilde{\nu}_e/\text{cm}^{-1}$ | $\tilde{\nu}_c/\text{cm}^{-1}$ | $\tilde{\nu}_e - \tilde{\nu}_c/10^{-3}\text{cm}^{-1}$ | $I_e/\text{cm}^{-2}\text{atm}^{-1}$ | $I_c/\text{cm}^{-2}\text{atm}^{-1}$ | $I_e - I_c/\%$ | $J''$ | $C''$ | $\alpha''$ | $J'$ | $C'$  | $\alpha'$ |
|--------------------------------|--------------------------------|-------------------------------------------------------|-------------------------------------|-------------------------------------|----------------|-------|-------|------------|------|-------|-----------|
| 5812.516080                    | 5812.512609                    | 3.471                                                 | $0.1884 \times 10^{-3}$             | $0.1948 \times 10^{-3}$             | -3.281         | 4     | $F_1$ | 1          | 4    | $F_2$ | 100       |
| 5812.643829                    | 5812.622957                    | 20.872                                                | $0.1378 \times 10^{-2}$             | $0.1296 \times 10^{-2}$             | 6.293          | 1     | $F_1$ | 1          | 0    | $F_2$ | 13        |
| 5813.245950                    | 5813.256247                    | -10.297                                               | $0.5150 \times 10^{-4}$             | $0.4555 \times 10^{-4}$             | 13.074         | 10    | $F_2$ | 2          | 10   | $F_1$ | 233       |
| 5813.516560                    | 5813.454026                    | 62.534                                                |                                     | $0.4887 \times 10^{-4}$             |                | 5     | $F_1$ | 2          | 4    | $F_2$ | 122       |
| 5813.527000                    | 5813.468606                    | 58.394                                                |                                     | $0.1525 \times 10^{-4}$             |                | 5     | $F_1$ | 1          | 4    | $F_2$ | 122       |
| 5813.743000                    | 5813.749827                    | -6.827                                                |                                     | $0.3672 \times 10^{-5}$             |                | 4     | $F_1$ | 1          | 4    | $F_2$ | 101       |
| 5813.802819                    | 5813.820517                    | -17.698                                               | $0.2202 \times 10^{-2}$             | $0.2271 \times 10^{-2}$             | -3.022         | 2     | $E$   | 1          | 2    | $E$   | 37        |
| 5814.213780                    | 5814.229670                    | -15.890                                               |                                     | $0.2312 \times 10^{-3}$             |                | 2     | $F_2$ | 1          | 1    | $F_1$ | 39        |
| 5814.230000                    | 5814.235822                    | -5.822                                                |                                     | $0.1785 \times 10^{-4}$             |                | 3     | $F_1$ | 1          | 2    | $F_2$ | 63        |
| 5814.340000                    | 5814.400465                    | -60.465                                               |                                     | $0.1004 \times 10^{-4}$             |                | 4     | $E$   | 1          | 3    | $E$   | 59        |
| 5814.560000                    | 5814.559972                    | 0.028                                                 |                                     | $0.1290 \times 10^{-5}$             |                | 3     | $F_2$ | 1          | 2    | $F_1$ | 57        |
| 5814.717310                    | 5814.715217                    | 2.093                                                 | $0.4883 \times 10^{-4}$             | $0.5537 \times 10^{-4}$             | -11.804        | 4     | $E$   | 1          | 4    | $E$   | 68        |
| 5814.814070                    | 5814.812561                    | 1.509                                                 |                                     | $0.8820 \times 10^{-4}$             |                | 9     | $A_1$ | 1          | 9    | $A_2$ | 73        |
| 5814.874000                    | 5814.847581                    | 26.419                                                | $0.4800 \times 10^{-3}$             | $0.4277 \times 10^{-3}$             | 12.227         | 3     | $F_2$ | 1          | 3    | $F_1$ | 79        |
| 5814.937570                    | 5814.932352                    | 5.218                                                 | $0.6456 \times 10^{-4}$             | $0.6838 \times 10^{-4}$             | -5.588         | 9     | $F_1$ | 2          | 9    | $F_2$ | 211       |
| 5815.034740                    | 5815.026342                    | 8.398                                                 | $0.5429 \times 10^{-4}$             | $0.5809 \times 10^{-4}$             | -6.543         | 9     | $E$   | 1          | 9    | $E$   | 142       |
| 5815.180168                    | 5815.170356                    | 9.812                                                 | $0.1122 \times 10^{-2}$             | $0.1088 \times 10^{-2}$             | 3.105          | 3     | $F_1$ | 1          | 3    | $F_2$ | 75        |
| 5816.168410                    | 5816.192265                    | -23.855                                               | $0.5130 \times 10^{-5}$             | $0.5511 \times 10^{-5}$             | -6.911         | 3     | $F_2$ | 1          | 2    | $F_1$ | 58        |
| 5816.581050                    | 5816.550376                    | 30.674                                                | $0.3767 \times 10^{-3}$             | $0.3778 \times 10^{-3}$             | -0.286         | 3     | $F_2$ | 1          | 3    | $F_1$ | 80        |
| 5816.635500                    | 5816.642719                    | -7.219                                                | $0.1013 \times 10^{-3}$             | $0.9061 \times 10^{-4}$             | 11.799         | 8     | $F_1$ | 2          | 8    | $F_2$ | 193       |
| 5816.799390                    | 5816.799539                    | -0.149                                                | $0.1531 \times 10^{-3}$             | $0.1409 \times 10^{-3}$             | 8.676          | 8     | $F_2$ | 1          | 8    | $F_1$ | 189       |
| 5816.826073                    | 5816.842423                    | -16.350                                               |                                     | $0.1947 \times 10^{-5}$             |                | 4     | $F_1$ | 1          | 4    | $F_2$ | 102       |
| 5817.755725                    | 5817.762967                    | -7.242                                                | $0.2300 \times 10^{-2}$             | $0.2307 \times 10^{-2}$             | -0.298         | 1     | $F_1$ | 1          | 1    | $F_2$ | 30        |
| 5818.385800                    | 5818.373665                    | 12.135                                                |                                     | $0.1513 \times 10^{-4}$             |                | 4     | $F_2$ | 1          | 4    | $F_1$ | 98        |
| 5818.561670                    | 5818.555051                    | 6.619                                                 | $0.5079 \times 10^{-3}$             | $0.4821 \times 10^{-3}$             | 5.353          | 7     | $A_2$ | 1          | 7    | $A_1$ | 53        |
| 5819.030370                    | 5819.032203                    | -1.833                                                | $0.1547 \times 10^{-4}$             | $0.1091 \times 10^{-4}$             | 41.813         | 7     | $F_2$ | 2          | 7    | $F_1$ | 172       |
| 5819.203230                    | 5819.188594                    | 14.636                                                | $0.6652 \times 10^{-3}$             | $0.6566 \times 10^{-3}$             | 1.306          | 2     | $E$   | 1          | 2    | $E$   | 38        |
| 5819.499230                    | 5819.510369                    | -11.139                                               | $0.1696 \times 10^{-3}$             | $0.1585 \times 10^{-3}$             | 7.022          | 6     | $F_1$ | 1          | 6    | $F_2$ | 149       |
| 5819.721846                    | 5819.686510                    | 35.336                                                | $0.9609 \times 10^{-3}$             | $0.9351 \times 10^{-3}$             | 2.757          | 2     | $F_2$ | 1          | 2    | $F_1$ | 51        |
| 5819.840660                    | 5819.840617                    | 0.043                                                 | $0.3369 \times 10^{-3}$             | $0.3222 \times 10^{-3}$             | 4.567          | 6     | $F_2$ | 2          | 6    | $F_1$ | 143       |
| 5819.859717                    | 5819.862333                    | -2.616                                                |                                     | $0.4163 \times 10^{-4}$             |                | 6     | $F_2$ | 1          | 6    | $F_1$ | 143       |
| 5820.057250                    | 5820.043726                    | 13.524                                                |                                     | $0.1705 \times 10^{-4}$             |                | 3     | $F_1$ | 1          | 3    | $F_2$ | 77        |
| 5820.782310                    | 5820.787412                    | -5.102                                                | $0.3139 \times 10^{-3}$             | $0.2918 \times 10^{-3}$             | 7.576          | 5     | $F_1$ | 2          | 5    | $F_2$ | 121       |
| 5820.793000                    | 5820.801993                    | -8.993                                                |                                     | $0.6499 \times 10^{-4}$             |                | 5     | $F_1$ | 1          | 5    | $F_2$ | 121       |
| 5821.142810                    | 5821.155757                    | -12.947                                               | $0.3953 \times 10^{-3}$             | $0.3787 \times 10^{-3}$             | 4.386          | 5     | $E$   | 1          | 5    | $E$   | 82        |
| 5821.305320                    | 5821.493327                    | -188.007                                              | $0.1012 \times 10^{-3}$             | $0.8419 \times 10^{-4}$             | 20.204         | 3     | $F_1$ | 1          | 2    | $F_2$ | 65        |
| 5821.652840                    | 5821.659595                    | -6.755                                                | $0.1468 \times 10^{-3}$             | $0.1464 \times 10^{-3}$             | 0.288          | 4     | $F_1$ | 1          | 4    | $F_2$ | 103       |
| 5821.835890                    | 5821.771457                    | 64.433                                                |                                     | $0.1137 \times 10^{-3}$             |                | 2     | $F_2$ | 1          | 1    | $F_1$ | 40        |
| 5821.965000                    | 5821.966718                    | -1.718                                                |                                     | $0.2340 \times 10^{-6}$             |                | 3     | $F_1$ | 1          | 2    | $F_2$ | 66        |
| 5822.171955                    | 5822.191094                    | -19.139                                               | $0.8450 \times 10^{-3}$             | $0.8244 \times 10^{-3}$             | 2.494          | 4     | $F_2$ | 1          | 4    | $F_1$ | 99        |
| 5822.759270                    | 5822.773941                    | -14.671                                               | $0.5705 \times 10^{-3}$             | $0.5890 \times 10^{-3}$             | -3.141         | 3     | $F_2$ | 1          | 3    | $F_1$ | 81        |
| 5822.795898                    | 5822.774809                    | 21.089                                                | $0.1219 \times 10^{-2}$             | $0.1135 \times 10^{-2}$             | 7.432          | 1     | $F_1$ | 1          | 1    | $F_2$ | 31        |
| 5822.959630                    | 5822.978919                    | -19.289                                               |                                     | $0.1089 \times 10^{-4}$             |                | 4     | $F_2$ | 1          | 3    | $F_1$ | 97        |
| 5823.906750                    | 5823.826270                    | 80.480                                                |                                     | $0.1892 \times 10^{-3}$             |                | 4     | $F_1$ | 1          | 3    | $F_2$ | 92        |
| 5824.090083                    | 5824.127098                    | -37.015                                               | $0.2870 \times 10^{-2}$             | $0.3010 \times 10^{-2}$             | -4.642         | 3     | $A_2$ | 1          | 3    | $A_1$ | 23        |
| 5824.432770                    | 5824.507323                    | -74.553                                               |                                     | $0.5640 \times 10^{-3}$             |                | 4     | $A_1$ | 1          | 3    | $A_2$ | 34        |
| 5824.649780                    | 5824.678061                    | -28.281                                               | $0.1220 \times 10^{-4}$             | $0.6267 \times 10^{-5}$             | 94.677         | 10    | $E$   | 2          | 10   | $E$   | 163       |
| 5825.205480                    | 5825.155269                    | 50.211                                                | $0.1975 \times 10^{-4}$             | $0.2852 \times 10^{-4}$             | -30.755        | 10    | $F_1$ | 1          | 10   | $F_2$ | 244       |
| 5825.570100                    | 5825.553059                    | 17.041                                                | $0.1178 \times 10^{-3}$             | $0.1185 \times 10^{-3}$             | -0.551         | 10    | $A_1$ | 1          | 10   | $A_2$ | 79        |
| 5825.691797                    | 5825.692736                    | -0.939                                                | $0.9132 \times 10^{-3}$             | $0.9158 \times 10^{-3}$             | -0.289         | 2     | $F_2$ | 1          | 2    | $F_1$ | 53        |

Table II (continued).

| $\tilde{\nu}_e/\text{cm}^{-1}$ | $\tilde{\nu}_c/\text{cm}^{-1}$ | $\tilde{\nu}_e - \tilde{\nu}_c/10^{-3}\text{cm}^{-1}$ | $I_e/\text{cm}^{-2}\text{atm}^{-1}$ | $I_c/\text{cm}^{-2}\text{atm}^{-1}$ | $I_e - I_c/\%$ | $J''$ | $C''$ | $\alpha''$ | $J'$ | $C'$  | $\alpha'$ |
|--------------------------------|--------------------------------|-------------------------------------------------------|-------------------------------------|-------------------------------------|----------------|-------|-------|------------|------|-------|-----------|
| 5825.905994                    | 5825.920347                    | -14.353                                               |                                     | $0.1866 \times 10^{-4}$             |                | 9     | $F_1$ | 3          | 9    | $F_2$ | 216       |
| 5826.203000                    | 5826.205185                    | -2.185                                                | $0.7339 \times 10^{-5}$             | $0.6382 \times 10^{-5}$             | 14.988         | 4     | $F_1$ | 1          | 4    | $F_2$ | 104       |
| 5826.412590                    | 5826.461587                    | -48.997                                               | $0.2556 \times 10^{-3}$             | $0.1285 \times 10^{-3}$             | 98.917         | 4     | $F_1$ | 1          | 3    | $F_2$ | 93        |
| 5826.499370                    | 5826.517646                    | -18.276                                               |                                     | $0.4440 \times 10^{-4}$             |                | 8     | $E$   | 1          | 8    | $E$   | 131       |
| 5826.694790                    | 5826.708287                    | -13.497                                               | $0.1880 \times 10^{-4}$             | $0.1837 \times 10^{-4}$             | 2.342          | 8     | $F_2$ | 1          | 8    | $F_1$ | 192       |
| 5826.893370                    | 5826.841244                    | 52.126                                                |                                     | $0.1899 \times 10^{-3}$             |                | 4     | $F_2$ | 1          | 3    | $F_1$ | 98        |
| 5826.972480                    | 5826.982407                    | -9.927                                                |                                     | $0.1423 \times 10^{-4}$             |                | 11    | $F_1$ | 2          | 11   | $F_2$ | 264       |
| 5827.142940                    | 5827.140403                    | 2.537                                                 |                                     | $0.2151 \times 10^{-4}$             |                | 3     | $F_2$ | 1          | 3    | $F_1$ | 82        |
| 5827.523590                    | 5827.532370                    | -8.780                                                |                                     | $0.4363 \times 10^{-4}$             |                | 4     | $F_2$ | 1          | 4    | $F_1$ | 100       |
| 5827.570000                    | 5827.583081                    | -13.081                                               |                                     | $0.1360 \times 10^{-4}$             |                | 8     | $F_2$ | 1          | 8    | $F_1$ | 193       |
| 5827.638020                    | 5827.625946                    | 12.074                                                |                                     | $0.3993 \times 10^{-4}$             |                | 10    | $F_1$ | 1          | 10   | $F_2$ | 246       |
| 5827.671980                    | 5827.687490                    | -15.510                                               | $0.1275 \times 10^{-4}$             | $0.9849 \times 10^{-5}$             | 29.452         | 7     | $F_2$ | 2          | 7    | $F_1$ | 175       |
| 5827.708952                    | 5827.725508                    | -16.556                                               |                                     | $0.2749 \times 10^{-4}$             |                | 7     | $F_2$ | 1          | 7    | $F_1$ | 175       |
| 5827.788380                    | 5827.779821                    | 8.559                                                 |                                     | $0.6215 \times 10^{-4}$             |                | 10    | $F_2$ | 2          | 10   | $F_1$ | 239       |
| 5828.002200                    | 5828.012737                    | -10.537                                               |                                     | $0.3500 \times 10^{-4}$             |                | 7     | $F_1$ | 2          | 7    | $F_2$ | 170       |
| 5828.060740                    | 5828.068428                    | -7.688                                                |                                     | $0.4142 \times 10^{-4}$             |                | 7     | $F_1$ | 1          | 7    | $F_2$ | 170       |
| 5828.660580                    | 5828.633196                    | 27.384                                                | $0.3552 \times 10^{-4}$             | $0.3254 \times 10^{-4}$             | 9.143          | 8     | $E$   | 2          | 8    | $E$   | 132       |
| 5828.747160                    | 5828.718838                    | 28.322                                                |                                     | $0.4218 \times 10^{-6}$             |                | 8     | $E$   | 1          | 8    | $E$   | 132       |
| 5828.872000                    | 5828.890847                    | -18.847                                               |                                     | $0.2721 \times 10^{-4}$             |                | 7     | $F_1$ | 1          | 7    | $F_2$ | 171       |
| 5829.136530                    | 5829.154698                    | -18.168                                               |                                     | $0.3799 \times 10^{-4}$             |                | 3     | $F_2$ | 1          | 3    | $F_1$ | 83        |
| 5829.534100                    | 5829.516884                    | 17.216                                                |                                     | $0.3992 \times 10^{-4}$             |                | 10    | $A_2$ | 1          | 10   | $A_1$ | 84        |
| 5829.868540                    | 5829.864354                    | 4.186                                                 | $0.1113 \times 10^{-1}$             | $0.6403 \times 10^{-2}$             | 73.812         | 0     | $A_1$ | 1          | 1    | $A_2$ | 13        |
| 5829.973960                    | 5829.962252                    | 11.708                                                |                                     | $0.2937 \times 10^{-4}$             |                | 5     | $F_2$ | 1          | 5    | $F_1$ | 130       |
| 5830.178000                    | 5830.112861                    | 65.139                                                |                                     | $0.1913 \times 10^{-5}$             |                | 3     | $F_2$ | 1          | 2    | $F_1$ | 62        |
| 5830.407040                    | 5830.412878                    | -5.838                                                | $0.8066 \times 10^{-4}$             | $0.9222 \times 10^{-4}$             | -12.531        | 7     | $F_2$ | 2          | 7    | $F_1$ | 177       |
| 5830.433658                    | 5830.430480                    | 3.178                                                 |                                     | $0.4465 \times 10^{-4}$             |                | 6     | $F_2$ | 1          | 6    | $F_1$ | 145       |
| 5830.909640                    | 5830.901996                    | 7.644                                                 |                                     | $0.4877 \times 10^{-4}$             |                | 9     | $F_1$ | 3          | 9    | $F_2$ | 219       |
| 5831.057670                    | 5831.059022                    | -1.352                                                | $0.3290 \times 10^{-4}$             | $0.3005 \times 10^{-4}$             | 9.479          | 6     | $F_2$ | 2          | 6    | $F_1$ | 146       |
| 5831.076000                    | 5831.080738                    | -4.738                                                |                                     | $0.1920 \times 10^{-5}$             |                | 6     | $F_2$ | 1          | 6    | $F_1$ | 146       |
| 5831.165780                    | 5831.147486                    | 18.294                                                | $0.1065 \times 10^{-3}$             | $0.1024 \times 10^{-3}$             | 3.955          | 5     | $F_1$ | 2          | 5    | $F_2$ | 124       |
| 5831.178000                    | 5831.162066                    | 15.934                                                |                                     | $0.1712 \times 10^{-4}$             |                | 5     | $F_1$ | 1          | 5    | $F_2$ | 124       |
| 5831.383360                    | 5831.367378                    | 15.982                                                | $0.1016 \times 10^{-3}$             | $0.1185 \times 10^{-3}$             | -14.283        | 4     | $F_2$ | 1          | 4    | $F_1$ | 101       |
| 5831.497870                    | 5831.453488                    | 44.382                                                | $0.4046 \times 10^{-4}$             | $0.3404 \times 10^{-4}$             | 18.845         | 1     | $F_1$ | 1          | 1    | $F_2$ | 32        |
| 5831.637440                    | 5831.633406                    | 4.034                                                 | $0.1423 \times 10^{-4}$             | $0.1327 \times 10^{-4}$             | 7.208          | 6     | $F_1$ | 1          | 6    | $F_2$ | 153       |
| 5831.713000                    | 5831.698229                    | 14.771                                                |                                     | $0.9455 \times 10^{-5}$             |                | 5     | $F_1$ | 2          | 5    | $F_2$ | 125       |
| 5831.727870                    | 5831.712810                    | 15.060                                                | $0.3846 \times 10^{-4}$             | $0.4359 \times 10^{-4}$             | -11.767        | 5     | $F_1$ | 1          | 5    | $F_2$ | 125       |
| 5832.118820                    | 5832.111285                    | 7.535                                                 |                                     | $0.4273 \times 10^{-4}$             |                | 5     | $F_2$ | 1          | 5    | $F_1$ | 131       |
| 5832.274732                    | 5832.266970                    | 7.762                                                 |                                     | $0.4399 \times 10^{-4}$             |                | 4     | $F_1$ | 1          | 4    | $F_2$ | 105       |
| 5832.313750                    | 5832.303209                    | 10.541                                                | $0.2343 \times 10^{-3}$             | $0.2511 \times 10^{-3}$             | -6.684         | 3     | $F_2$ | 1          | 3    | $F_1$ | 84        |
| 5832.565153                    | 5832.489520                    | 75.633                                                |                                     | $0.2304 \times 10^{-5}$             |                | 3     | $F_1$ | 1          | 2    | $F_2$ | 69        |
| 5832.852690                    | 5832.840712                    | 11.978                                                | $0.2202 \times 10^{-3}$             | $0.2192 \times 10^{-3}$             | 0.462          | 4     | $E$   | 1          | 4    | $E$   | 71        |
| 5832.960700                    | 5832.949873                    | 10.827                                                | $0.1218 \times 10^{-3}$             | $0.1243 \times 10^{-3}$             | -2.009         | 8     | $F_1$ | 2          | 8    | $F_2$ | 200       |
| 5833.072230                    | 5833.105825                    | -33.595                                               |                                     | $0.1477 \times 10^{-3}$             |                | 7     | $F_2$ | 2          | 7    | $F_1$ | 178       |
| 5833.123084                    | 5833.140780                    | -17.696                                               |                                     | $0.6839 \times 10^{-5}$             |                | 2     | $F_2$ | 1          | 2    | $F_1$ | 54        |
| 5833.284980                    | 5833.290251                    | -5.271                                                | $0.1422 \times 10^{-3}$             | $0.1399 \times 10^{-3}$             | 1.652          | 2     | $E$   | 1          | 2    | $E$   | 40        |
| 5833.430910                    | 5833.418258                    | 12.652                                                |                                     | $0.3070 \times 10^{-4}$             |                | 4     | $F_2$ | 1          | 4    | $F_1$ | 102       |
| 5834.242008                    | 5834.238339                    | 3.669                                                 | $0.2576 \times 10^{-2}$             | $0.2667 \times 10^{-2}$             | -3.407         | 1     | $F_1$ | 1          | 2    | $F_2$ | 56        |
| 5835.149780                    | 5835.136127                    | 13.653                                                | $0.2413 \times 10^{-3}$             | $0.2338 \times 10^{-3}$             | 3.222          | 3     | $F_1$ | 1          | 3    | $F_2$ | 80        |
| 5835.308605                    | 5835.392756                    | -84.151                                               | $0.1980 \times 10^{-2}$             | $0.2028 \times 10^{-2}$             | -2.358         | 6     | $A_1$ | 1          | 6    | $A_2$ | 50        |
| 5835.449800                    | 5835.430224                    | 19.576                                                |                                     | $0.1352 \times 10^{-3}$             |                | 4     | $F_1$ | 1          | 4    | $F_2$ | 106       |

Table II (continued).

| $\tilde{\nu}_e/\text{cm}^{-1}$ | $\tilde{\nu}_c/\text{cm}^{-1}$ | $\tilde{\nu}_e - \tilde{\nu}_c/10^{-3}\text{cm}^{-1}$ | $I_e/\text{cm}^{-2}\text{atm}^{-1}$ | $I_c/\text{cm}^{-2}\text{atm}^{-1}$ | $I_e - I_c/\%$ | $J''$ | $C''$ | $\alpha''$ | $J'$ | $C'$  | $\alpha'$ |
|--------------------------------|--------------------------------|-------------------------------------------------------|-------------------------------------|-------------------------------------|----------------|-------|-------|------------|------|-------|-----------|
| 5835.975383                    | 5836.000309                    | -24.926                                               | $0.8783 \times 10^{-3}$             | $0.9529 \times 10^{-3}$             | -7.829         | 4     | $F_2$ | 1          | 4    | $F_1$ | 103       |
| 5836.047610                    | 5836.050944                    | -3.334                                                | $0.3100 \times 10^{-3}$             | $0.3541 \times 10^{-3}$             | -12.448        | 6     | $F_2$ | 2          | 6    | $F_1$ | 149       |
| 5836.067942                    | 5836.072661                    | -4.719                                                |                                     | $0.9588 \times 10^{-4}$             |                | 6     | $F_2$ | 1          | 6    | $F_1$ | 149       |
| 5836.386380                    | 5836.369218                    | 17.162                                                | $0.2919 \times 10^{-3}$             | $0.2994 \times 10^{-3}$             | -2.490         | 5     | $F_1$ | 2          | 5    | $F_2$ | 127       |
| 5836.905793                    | 5836.903174                    | 2.619                                                 | $0.1275 \times 10^{-2}$             | $0.1329 \times 10^{-2}$             | -4.084         | 3     | $A_2$ | 1          | 3    | $A_1$ | 24        |
| 5836.973290                    | 5836.945904                    | 27.386                                                | $0.2941 \times 10^{-3}$             | $0.3096 \times 10^{-3}$             | -5.014         | 4     | $E$   | 1          | 4    | $E$   | 72        |
| 5837.076940                    | 5837.057404                    | 19.536                                                |                                     | $0.2271 \times 10^{-3}$             |                | 4     | $F_1$ | 1          | 4    | $F_2$ | 107       |
| 5837.582590                    | 5837.557436                    | 25.154                                                | $0.3892 \times 10^{-3}$             | $0.3929 \times 10^{-3}$             | -0.945         | 3     | $F_2$ | 1          | 3    | $F_1$ | 85        |
| 5838.074850                    | 5838.085460                    | -10.610                                               | $0.1993 \times 10^{-4}$             | $0.5083 \times 10^{-4}$             | -60.789        | 10    | $F_2$ | 3          | 10   | $F_1$ | 249       |
| 5838.357567                    | 5838.376868                    | -19.301                                               | $0.8535 \times 10^{-3}$             | $0.7664 \times 10^{-3}$             | 11.367         | 2     | $F_2$ | 1          | 3    | $F_1$ | 77        |
| 5839.240404                    | 5839.249453                    | -9.049                                                |                                     | $0.1977 \times 10^{-2}$             |                | 2     | $E$   | 1          | 3    | $E$   | 49        |
| 5839.363380                    | 5839.374781                    | -11.401                                               | $0.4751 \times 10^{-3}$             | $0.5221 \times 10^{-3}$             | -9.010         | 1     | $F_1$ | 1          | 2    | $F_2$ | 57        |
| 5839.871916                    | 5839.865780                    | 6.136                                                 |                                     | $0.4463 \times 10^{-5}$             |                | 3     | $F_1$ | 1          | 3    | $F_2$ | 81        |
| 5840.273693                    | 5840.243912                    | 29.781                                                | $0.2303 \times 10^{-2}$             | $0.2093 \times 10^{-2}$             | 10.040         | 1     | $F_1$ | 1          | 2    | $F_2$ | 58        |
| 5840.418810                    | 5840.422513                    | -3.703                                                | $0.5257 \times 10^{-4}$             | $0.5350 \times 10^{-4}$             | -1.739         | 4     | $F_1$ | 1          | 4    | $F_2$ | 108       |
| 5840.588674                    | 5840.591850                    | -3.176                                                | $0.2422 \times 10^{-2}$             | $0.2382 \times 10^{-2}$             | 1.698          | 2     | $F_2$ | 1          | 3    | $F_1$ | 78        |
| 5841.217520                    | 5841.147054                    | 70.466                                                |                                     | $0.1367 \times 10^{-3}$             |                | 6     | $E$   | 1          | 6    | $E$   | 104       |
| 5841.155880                    | 5841.164050                    | -8.170                                                | $0.2671 \times 10^{-3}$             | $0.2619 \times 10^{-3}$             | 1.976          | 5     | $F_1$ | 1          | 5    | $F_2$ | 128       |
| 5841.517429                    | 5841.462782                    | 54.647                                                |                                     | $0.6428 \times 10^{-4}$             |                | 6     | $F_2$ | 2          | 6    | $F_1$ | 151       |
| 5841.538490                    | 5841.484498                    | 53.992                                                |                                     | $0.1365 \times 10^{-3}$             |                | 6     | $F_2$ | 1          | 6    | $F_1$ | 151       |
| 5842.478000                    | 5842.468667                    | 9.333                                                 |                                     | $0.1311 \times 10^{-4}$             |                | 6     | $F_1$ | 1          | 6    | $F_2$ | 158       |
| 5842.526000                    | 5842.535590                    | -9.590                                                |                                     | $0.1061 \times 10^{-3}$             |                | 7     | $F_2$ | 2          | 7    | $F_1$ | 183       |
| 5842.550000                    | 5842.554499                    | -4.499                                                |                                     | $0.1424 \times 10^{-4}$             |                | 7     | $F_1$ | 2          | 7    | $F_2$ | 179       |
| 5842.563290                    | 5842.573609                    | -10.319                                               | $0.1230 \times 10^{-3}$             | $0.1269 \times 10^{-3}$             | -3.054         | 7     | $F_2$ | 1          | 7    | $F_1$ | 183       |
| 5842.609210                    | 5842.610190                    | -0.980                                                | $0.1782 \times 10^{-3}$             | $0.1883 \times 10^{-3}$             | -5.389         | 7     | $F_1$ | 1          | 7    | $F_2$ | 179       |
| 5842.738810                    | 5842.734150                    | 4.660                                                 | $0.4448 \times 10^{-3}$             | $0.4436 \times 10^{-3}$             | 0.281          | 3     | $F_2$ | 1          | 4    | $F_1$ | 93        |
| 5842.904000                    | 5842.972216                    | -68.216                                               | $0.4903 \times 10^{-3}$             | $0.4612 \times 10^{-3}$             | 6.318          | 1     | $F_1$ | 1          | 1    | $F_2$ | 33        |
| 5843.228902                    | 5843.230289                    | -1.387                                                |                                     | $0.5582 \times 10^{-4}$             |                | 6     | $E$   | 1          | 6    | $E$   | 105       |
| 5843.254000                    | 5843.254998                    | -0.998                                                | $0.1712 \times 10^{-3}$             | $0.1916 \times 10^{-3}$             | -10.631        | 2     | $F_2$ | 1          | 2    | $F_1$ | 56        |
| 5843.582070                    | 5843.535387                    | 46.683                                                |                                     | $0.5051 \times 10^{-4}$             |                | 1     | $F_1$ | 1          | 1    | $F_2$ | 34        |
| 5843.664950                    | 5843.669470                    | -4.520                                                | $0.1698 \times 10^{-3}$             | $0.1212 \times 10^{-3}$             | 40.102         | 9     | $E$   | 1          | 9    | $E$   | 155       |
| 5843.981711                    | 5844.005374                    | -23.663                                               | $0.2162 \times 10^{-2}$             | $0.2221 \times 10^{-2}$             | -2.677         | 3     | $F_1$ | 1          | 4    | $F_2$ | 97        |
| 5844.201860                    | 5844.192500                    | 9.360                                                 |                                     | $0.1376 \times 10^{-3}$             |                | 8     | $F_2$ | 1          | 8    | $F_1$ | 205       |
| 5844.403708                    | 5844.434001                    | -30.293                                               |                                     | $0.9861 \times 10^{-4}$             |                | 3     | $F_2$ | 1          | 3    | $F_1$ | 86        |
| 5844.650330                    | 5844.672919                    | -22.589                                               | $0.1098 \times 10^{-3}$             | $0.1067 \times 10^{-3}$             | 2.893          | 3     | $F_1$ | 1          | 3    | $F_2$ | 82        |
| 5844.898600                    | 5844.905240                    | -6.640                                                | $0.5749 \times 10^{-3}$             | $0.4681 \times 10^{-3}$             | 22.828         | 2     | $E$   | 1          | 2    | $E$   | 41        |
| 5845.297590                    | 5845.292878                    | 4.712                                                 | $0.4805 \times 10^{-3}$             | $0.5068 \times 10^{-3}$             | -5.198         | 1     | $F_1$ | 1          | 2    | $F_2$ | 59        |
| 5845.407730                    | 5845.430296                    | -22.566                                               | $0.1434 \times 10^{-3}$             | $0.1285 \times 10^{-3}$             | 11.617         | 2     | $E$   | 1          | 1    | $E$   | 26        |
| 5845.520000                    | 5845.560169                    | -40.169                                               |                                     | $0.6540 \times 10^{-5}$             |                | 4     | $F_1$ | 1          | 4    | $F_2$ | 109       |
| 5845.589088                    | 5845.594427                    | -5.339                                                |                                     | $0.4036 \times 10^{-5}$             |                | 5     | $F_1$ | 1          | 5    | $F_2$ | 129       |
| 5845.697070                    | 5845.698777                    | -1.707                                                | $0.3738 \times 10^{-2}$             | $0.2427 \times 10^{-2}$             | 54.008         | 3     | $F_2$ | 1          | 4    | $F_1$ | 94        |
| 5845.749800                    | 5845.819952                    | -70.152                                               |                                     | $0.5655 \times 10^{-4}$             |                | 4     | $E$   | 1          | 4    | $E$   | 73        |
| 5845.994060                    | 5845.994418                    | -0.358                                                | $0.6576 \times 10^{-3}$             | $0.5573 \times 10^{-3}$             | 17.995         | 2     | $F_2$ | 1          | 2    | $F_1$ | 57        |
| 5846.051200                    | 5846.107855                    | -56.655                                               | $0.1626 \times 10^{-3}$             | $0.1634 \times 10^{-3}$             | -0.516         | 2     | $F_2$ | 1          | 1    | $F_1$ | 44        |
| 5846.140000                    | 5846.128686                    | 11.314                                                |                                     | $0.3532 \times 10^{-4}$             |                | 4     | $F_1$ | 1          | 4    | $F_2$ | 110       |
| 5846.207856                    | 5846.221403                    | -13.547                                               | $0.9049 \times 10^{-3}$             | $0.8912 \times 10^{-3}$             | 1.539          | 3     | $F_1$ | 1          | 4    | $F_2$ | 98        |
| 5846.309464                    | 5846.282027                    | 27.437                                                | $0.1749 \times 10^{-2}$             | $0.1787 \times 10^{-2}$             | -2.151         | 2     | $F_2$ | 1          | 3    | $F_1$ | 79        |
| 5846.377420                    | 5846.386685                    | -9.265                                                | $0.7828 \times 10^{-2}$             | $0.5312 \times 10^{-2}$             | 47.367         | 3     | $A_2$ | 1          | 4    | $A_1$ | 36        |
| 5846.543990                    | 5846.569640                    | -25.650                                               | $0.5140 \times 10^{-4}$             | $0.4649 \times 10^{-4}$             | 10.562         | 4     | $F_2$ | 1          | 4    | $F_1$ | 105       |
| 5846.731030                    | 5846.772995                    | -41.965                                               | $0.1248 \times 10^{-3}$             | $0.1181 \times 10^{-3}$             | 5.687          | 3     | $F_2$ | 1          | 3    | $F_1$ | 87        |

Table II (continued).

| $\tilde{\nu}_e/\text{cm}^{-1}$ | $\tilde{\nu}_c/\text{cm}^{-1}$ | $\tilde{\nu}_e - \tilde{\nu}_c/10^{-3}\text{cm}^{-1}$ | $I_e/\text{cm}^{-2}\text{atm}^{-1}$ | $I_c/\text{cm}^{-2}\text{atm}^{-1}$ | $I_e - I_c/\%$ | $J''$ | $C''$ | $\alpha''$ | $J'$ | $C'$  | $\alpha'$ |
|--------------------------------|--------------------------------|-------------------------------------------------------|-------------------------------------|-------------------------------------|----------------|-------|-------|------------|------|-------|-----------|
| 5847.498210                    | 5847.453573                    | 44.637                                                |                                     | $0.1506 \times 10^{-2}$             |                | 2     | $E$   | 1          | 3    | $E$   | 50        |
| 5847.602680                    | 5847.626711                    | -24.031                                               | $0.2999 \times 10^{-3}$             | $0.2854 \times 10^{-3}$             | 5.096          | 2     | $F_2$ | 1          | 2    | $F_1$ | 58        |
| 5847.717380                    | 5847.681562                    | 35.818                                                | $0.3824 \times 10^{-4}$             | $0.3815 \times 10^{-4}$             | 0.245          | 4     | $F_2$ | 1          | 4    | $F_1$ | 106       |
| 5847.825372                    | 5847.781670                    | 43.702                                                | $0.2882 \times 10^{-3}$             | $0.2800 \times 10^{-3}$             | 2.915          | 3     | $F_2$ | 1          | 4    | $F_1$ | 95        |
| 5847.806820                    | 5847.821681                    | -14.861                                               |                                     | $0.9300 \times 10^{-4}$             |                | 5     | $E$   | 1          | 5    | $E$   | 88        |
| 5848.015730                    | 5847.984822                    | 30.908                                                | $0.4597 \times 10^{-3}$             | $0.4370 \times 10^{-3}$             | 5.185          | 2     | $F_2$ | 1          | 3    | $F_1$ | 80        |
| 5848.082667                    | 5848.083954                    | -1.287                                                | $0.9130 \times 10^{-3}$             | $0.8271 \times 10^{-3}$             | 10.386         | 3     | $F_1$ | 1          | 3    | $F_2$ | 83        |
| 5848.401510                    | 5848.404990                    | -3.480                                                | $0.1969 \times 10^{-3}$             | $0.2039 \times 10^{-3}$             | -3.415         | 4     | $F_1$ | 1          | 4    | $F_2$ | 111       |
| 5849.243970                    | 5849.262008                    | -18.038                                               | $0.1157 \times 10^{-3}$             | $0.8701 \times 10^{-4}$             | 32.973         | 5     | $F_2$ | 1          | 5    | $F_1$ | 138       |
| 5849.405570                    | 5849.456728                    | -51.158                                               | $0.4227 \times 10^{-2}$             | $0.4763 \times 10^{-2}$             | -11.248        | 4     | $A_1$ | 1          | 5    | $A_2$ | 41        |
| 5849.699320                    | 5849.672119                    | 27.201                                                | $0.9350 \times 10^{-4}$             | $0.7545 \times 10^{-4}$             | 23.917         | 6     | $F_2$ | 2          | 6    | $F_1$ | 156       |
| 5849.765000                    | 5849.774032                    | -9.032                                                |                                     | $0.3923 \times 10^{-4}$             |                | 4     | $F_1$ | 1          | 4    | $F_2$ | 112       |
| 5849.785000                    | 5849.802209                    | -17.209                                               |                                     | $0.1708 \times 10^{-2}$             |                | 4     | $F_1$ | 1          | 5    | $F_2$ | 115       |
| 5850.213307                    | 5850.223558                    | -10.251                                               |                                     | $0.6822 \times 10^{-4}$             |                | 5     | $F_1$ | 1          | 5    | $F_2$ | 132       |
| 5850.254812                    | 5850.245690                    | 9.122                                                 | $0.4095 \times 10^{-3}$             | $0.4056 \times 10^{-3}$             | 0.965          | 4     | $F_2$ | 1          | 5    | $F_1$ | 120       |
| 5850.500502                    | 5850.467050                    | 33.452                                                | $0.1341 \times 10^{-2}$             | $0.1478 \times 10^{-2}$             | -9.251         | 3     | $F_1$ | 1          | 3    | $F_2$ | 84        |
| 5850.478357                    | 5850.543531                    | -65.174                                               | $0.1471 \times 10^{-2}$             | $0.1505 \times 10^{-2}$             | -2.274         | 3     | $F_2$ | 1          | 3    | $F_1$ | 88        |
| 5851.029790                    | 5851.010028                    | 19.762                                                | $0.2750 \times 10^{-4}$             | $0.3032 \times 10^{-4}$             | -9.296         | 4     | $F_2$ | 1          | 4    | $F_1$ | 107       |
| 5851.093310                    | 5851.081382                    | 11.928                                                | $0.2091 \times 10^{-4}$             | $0.1878 \times 10^{-4}$             | 11.354         | 8     | $F_1$ | 2          | 8    | $F_2$ | 214       |
| 5851.477370                    | 5851.466592                    | 10.778                                                | $0.4944 \times 10^{-4}$             | $0.5512 \times 10^{-4}$             | -10.309        | 1     | $F_1$ | 1          | 2    | $F_2$ | 60        |
| 5851.502050                    | 5851.508009                    | -5.959                                                | $0.9323 \times 10^{-4}$             | $0.1106 \times 10^{-3}$             | -15.705        | 4     | $F_1$ | 1          | 4    | $F_2$ | 113       |
| 5851.676750                    | 5851.701946                    | -25.196                                               | $0.1517 \times 10^{-2}$             | $0.1481 \times 10^{-2}$             | 2.414          | 4     | $E$   | 1          | 5    | $E$   | 78        |
| 5851.814270                    | 5851.819858                    | -5.588                                                | $0.2235 \times 10^{-2}$             | $0.2113 \times 10^{-2}$             | 5.770          | 4     | $F_2$ | 1          | 5    | $F_1$ | 121       |
| 5851.724583                    | 5851.919637                    | -195.054                                              | $0.1940 \times 10^{-2}$             | $0.1832 \times 10^{-2}$             | 5.923          | 3     | $A_2$ | 1          | 3    | $A_1$ | 25        |
| 5852.062310                    | 5852.057808                    | 4.502                                                 | $0.7261 \times 10^{-4}$             | $0.7146 \times 10^{-4}$             | 1.609          | 9     | $A_1$ | 1          | 9    | $A_2$ | 81        |
| 5852.117400                    | 5852.109400                    | 8.000                                                 | $0.3087 \times 10^{-3}$             | $0.2353 \times 10^{-3}$             | 31.173         | 6     | $A_2$ | 1          | 6    | $A_1$ | 56        |
| 5852.199730                    | 5852.214163                    | -14.433                                               | $0.2698 \times 10^{-4}$             | $0.1970 \times 10^{-4}$             | 36.985         | 5     | $E$   | 1          | 5    | $E$   | 90        |
| 5852.273400                    | 5852.270718                    | 2.682                                                 | $0.6730 \times 10^{-3}$             | $0.6773 \times 10^{-3}$             | -0.630         | 4     | $F_1$ | 1          | 5    | $F_2$ | 116       |
| 5852.311050                    | 5852.305785                    | 5.265                                                 | $0.2084 \times 10^{-4}$             | $0.1214 \times 10^{-4}$             | 71.623         | 5     | $F_2$ | 1          | 5    | $F_1$ | 139       |
| 5852.512474                    | 5852.480543                    | 31.931                                                | $0.4024 \times 10^{-2}$             | $0.4490 \times 10^{-2}$             | -10.386        | 3     | $A_2$ | 1          | 4    | $A_1$ | 37        |
| 5852.749873                    | 5852.722755                    | 27.118                                                | $0.2028 \times 10^{-2}$             | $0.2026 \times 10^{-2}$             | 0.122          | 3     | $F_2$ | 1          | 4    | $F_1$ | 96        |
| 5852.832830                    | 5852.816030                    | 16.800                                                | $0.7723 \times 10^{-3}$             | $0.6695 \times 10^{-3}$             | 15.362         | 3     | $F_1$ | 1          | 4    | $F_2$ | 99        |
| 5852.858000                    | 5852.824282                    | 33.718                                                |                                     | $0.1305 \times 10^{-3}$             |                | 6     | $F_2$ | 1          | 6    | $F_1$ | 158       |
| 5852.845810                    | 5852.853652                    | -7.842                                                |                                     | $0.2547 \times 10^{-3}$             |                | 5     | $F_1$ | 1          | 5    | $F_2$ | 133       |
| 5853.190000                    | 5853.206388                    | -16.388                                               | $0.1223 \times 10^{-3}$             | $0.7360 \times 10^{-4}$             | 66.173         | 5     | $F_1$ | 2          | 6    | $F_2$ | 140       |
| 5853.203442                    | 5853.220969                    | -17.527                                               |                                     | $0.3636 \times 10^{-3}$             |                | 5     | $F_1$ | 1          | 6    | $F_2$ | 140       |
| 5853.257601                    | 5853.253192                    | 4.409                                                 | $0.8839 \times 10^{-3}$             | $0.7941 \times 10^{-3}$             | 11.311         | 5     | $F_2$ | 1          | 6    | $F_1$ | 134       |
| 5853.946760                    | 5853.949476                    | -2.716                                                | $0.5495 \times 10^{-3}$             | $0.5349 \times 10^{-3}$             | 2.727          | 4     | $F_2$ | 1          | 5    | $F_1$ | 122       |
| 5854.166451                    | 5854.151804                    | 14.647                                                | $0.1811 \times 10^{-2}$             | $0.1263 \times 10^{-2}$             | 43.362         | 4     | $E$   | 1          | 4    | $E$   | 75        |
| 5854.192477                    | 5854.208387                    | -15.910                                               | $0.1418 \times 10^{-2}$             | $0.1307 \times 10^{-2}$             | 8.510          | 2     | $F_2$ | 1          | 3    | $F_1$ | 81        |
| 5854.272713                    | 5854.263333                    | 9.380                                                 | $0.1650 \times 10^{-2}$             | $0.1754 \times 10^{-2}$             | -5.944         | 4     | $F_1$ | 1          | 4    | $F_2$ | 114       |
| 5854.415000                    | 5854.411523                    | 3.477                                                 | $0.1101 \times 10^{-2}$             | $0.9208 \times 10^{-3}$             | 19.570         | 3     | $F_1$ | 1          | 4    | $F_2$ | 100       |
| 5854.440875                    | 5854.430677                    | 10.198                                                | $0.3985 \times 10^{-2}$             | $0.3797 \times 10^{-2}$             | 4.962          | 4     | $A_1$ | 1          | 4    | $A_2$ | 35        |
| 5854.527638                    | 5854.516930                    | 10.708                                                |                                     | $0.2012 \times 10^{-3}$             |                | 7     | $F_2$ | 1          | 7    | $F_1$ | 190       |
| 5854.504700                    | 5854.538484                    | -33.784                                               | $0.1223 \times 10^{-3}$             | $0.1073 \times 10^{-3}$             | 13.948         | 4     | $F_1$ | 1          | 5    | $F_2$ | 117       |
| 5854.943461                    | 5854.934385                    | 9.076                                                 | $0.1398 \times 10^{-2}$             | $0.1235 \times 10^{-2}$             | 13.229         | 2     | $E$   | 1          | 3    | $E$   | 52        |
| 5854.981156                    | 5854.982462                    | -1.306                                                |                                     | $0.6284 \times 10^{-3}$             |                | 4     | $F_1$ | 1          | 4    | $F_2$ | 115       |
| 5855.060708                    | 5855.054663                    | 6.045                                                 |                                     | $0.2891 \times 10^{-3}$             |                | 4     | $F_2$ | 1          | 4    | $F_1$ | 109       |
| 5855.189500                    | 5855.212116                    | -22.616                                               |                                     | $0.1165 \times 10^{-3}$             |                | 5     | $F_1$ | 2          | 6    | $F_2$ | 141       |
| 5855.202960                    | 5855.226696                    | -23.736                                               |                                     | $0.1915 \times 10^{-2}$             |                | 5     | $F_1$ | 1          | 6    | $F_2$ | 141       |

Table II (continued).

| $\tilde{\nu}_e/\text{cm}^{-1}$ | $\tilde{\nu}_c/\text{cm}^{-1}$ | $\tilde{\nu}_e - \tilde{\nu}_c/10^{-3}\text{cm}^{-1}$ | $I_e/\text{cm}^{-2}\text{atm}^{-1}$ | $I_c/\text{cm}^{-2}\text{atm}^{-1}$ | $I_e - I_c/\%$ | $J''$ | $C''$ | $\alpha''$ | $J'$ | $C'$  | $\alpha'$ |
|--------------------------------|--------------------------------|-------------------------------------------------------|-------------------------------------|-------------------------------------|----------------|-------|-------|------------|------|-------|-----------|
| 5855.493469                    | 5855.471852                    | 21.617                                                |                                     | $0.4567 \times 10^{-4}$             |                | 7     | $F_2$ | 2          | 7    | $F_1$ | 191       |
| 5855.530970                    | 5855.509871                    | 21.099                                                | $0.1116 \times 10^{-3}$             | $0.9459 \times 10^{-4}$             | 17.979         | 7     | $F_2$ | 1          | 7    | $F_1$ | 191       |
| 5855.575823                    | 5855.525590                    | 50.233                                                | $0.8533 \times 10^{-3}$             | $0.6753 \times 10^{-3}$             | 26.355         | 5     | $E$   | 1          | 6    | $E$   | 93        |
| 5855.602590                    | 5855.607598                    | -5.008                                                | $0.6945 \times 10^{-4}$             | $0.7724 \times 10^{-4}$             | -10.088        | 7     | $E$   | 1          | 7    | $E$   | 125       |
| 5855.642728                    | 5855.648741                    | -6.013                                                |                                     | $0.7631 \times 10^{-7}$             |                | 3     | $F_1$ | 1          | 4    | $F_2$ | 101       |
| 5855.905000                    | 5855.880498                    | 24.502                                                |                                     | $0.6393 \times 10^{-4}$             |                | 4     | $F_2$ | 1          | 4    | $F_1$ | 111       |
| 5855.917000                    | 5855.913475                    | 3.525                                                 |                                     | $0.4512 \times 10^{-3}$             |                | 5     | $F_2$ | 1          | 6    | $F_1$ | 135       |
| 5856.045000                    | 5856.051491                    | -6.491                                                |                                     | $0.1336 \times 10^{-3}$             |                | 5     | $F_1$ | 2          | 5    | $F_2$ | 135       |
| 5856.059757                    | 5856.066072                    | -6.315                                                |                                     | $0.7219 \times 10^{-3}$             |                | 5     | $F_1$ | 1          | 5    | $F_2$ | 135       |
| 5856.638974                    | 5856.630511                    | 8.463                                                 | $0.6615 \times 10^{-3}$             | $0.6758 \times 10^{-3}$             | -2.119         | 0     | $A_1$ | 1          | 1    | $A_2$ | 14        |
| 5856.753385                    | 5856.806870                    | -53.485                                               | $0.7278 \times 10^{-3}$             | $0.6159 \times 10^{-3}$             | 18.172         | 6     | $E$   | 1          | 6    | $E$   | 110       |
| 5857.001708                    | 5856.979529                    | 22.179                                                |                                     | $0.1563 \times 10^{-4}$             |                | 1     | $F_1$ | 1          | 2    | $F_2$ | 61        |
| 5857.050368                    | 5857.061078                    | -10.710                                               | $0.1737 \times 10^{-2}$             | $0.1757 \times 10^{-2}$             | -1.126         | 5     | $F_2$ | 1          | 5    | $F_1$ | 142       |
| 5857.482477                    | 5857.472299                    | 10.178                                                | $0.1155 \times 10^{-2}$             | $0.1138 \times 10^{-2}$             | 1.488          | 5     | $F_2$ | 1          | 6    | $F_1$ | 136       |
| 5857.570090                    | 5857.562566                    | 7.524                                                 |                                     | $0.2023 \times 10^{-3}$             |                | 4     | $F_2$ | 1          | 4    | $F_1$ | 112       |
| 5857.653610                    | 5857.614265                    | 39.345                                                | $0.6405 \times 10^{-3}$             | $0.6194 \times 10^{-3}$             | 3.402          | 5     | $E$   | 1          | 6    | $E$   | 94        |
| 5857.738000                    | 5857.703045                    | 34.955                                                | $0.2202 \times 10^{-2}$             | $0.2230 \times 10^{-2}$             | -1.258         | 5     | $F_1$ | 2          | 6    | $F_2$ | 142       |
| 5857.750000                    | 5857.717625                    | 32.375                                                |                                     | $0.1005 \times 10^{-3}$             |                | 5     | $F_1$ | 1          | 6    | $F_2$ | 142       |
| 5858.571900                    | 5858.567677                    | 4.223                                                 |                                     | $0.5817 \times 10^{-3}$             |                | 6     | $F_2$ | 1          | 6    | $F_1$ | 161       |
| 5858.576428                    | 5858.574849                    | 1.579                                                 |                                     | $0.1667 \times 10^{-3}$             |                | 2     | $F_2$ | 1          | 3    | $F_1$ | 82        |
| 5858.710001                    | 5858.693628                    | 16.373                                                |                                     | $0.9802 \times 10^{-3}$             |                | 4     | $E$   | 1          | 5    | $E$   | 79        |
| 5858.808893                    | 5858.798214                    | 10.679                                                | $0.2394 \times 10^{-2}$             | $0.2016 \times 10^{-2}$             | 18.770         | 4     | $F_2$ | 1          | 5    | $F_1$ | 123       |
| 5858.972240                    | 5859.009603                    | -37.363                                               |                                     | $0.7834 \times 10^{-3}$             |                | 5     | $F_1$ | 2          | 5    | $F_2$ | 136       |
| 5859.071750                    | 5859.019873                    | 51.877                                                |                                     | $0.1118 \times 10^{-2}$             |                | 5     | $E$   | 1          | 5    | $E$   | 93        |
| 5858.985860                    | 5859.024183                    | -38.323                                               |                                     | $0.1207 \times 10^{-2}$             |                | 5     | $F_1$ | 1          | 5    | $F_2$ | 136       |
| 5859.225400                    | 5859.200741                    | 24.659                                                |                                     | $0.1133 \times 10^{-2}$             |                | 5     | $F_1$ | 2          | 5    | $F_2$ | 137       |
| 5859.251572                    | 5859.215322                    | 36.250                                                |                                     | $0.5600 \times 10^{-3}$             |                | 5     | $F_1$ | 1          | 5    | $F_2$ | 137       |
| 5859.435365                    | 5859.464850                    | -29.485                                               |                                     | $0.3500 \times 10^{-4}$             |                | 4     | $F_1$ | 1          | 4    | $F_2$ | 118       |
| 5859.490420                    | 5859.525320                    | -34.900                                               |                                     | $0.6176 \times 10^{-4}$             |                | 7     | $E$   | 1          | 7    | $E$   | 126       |
| 5859.988640                    | 5860.001372                    | -12.732                                               |                                     | $0.3095 \times 10^{-3}$             |                | 5     | $E$   | 1          | 5    | $E$   | 94        |
| 5860.288593                    | 5860.276823                    | 11.770                                                |                                     | $0.1205 \times 10^{-4}$             |                | 3     | $F_2$ | 1          | 4    | $F_1$ | 98        |
| 5860.410710                    | 5860.432170                    | -21.460                                               | $0.6072 \times 10^{-3}$             | $0.5875 \times 10^{-3}$             | 3.354          | 4     | $F_1$ | 1          | 5    | $F_2$ | 119       |
| 5860.487919                    | 5860.435165                    | 52.754                                                | $0.1692 \times 10^{-2}$             | $0.1210 \times 10^{-2}$             | 39.886         | 6     | $A_1$ | 1          | 6    | $A_2$ | 52        |
| 5860.449664                    | 5860.451127                    | -1.463                                                | $0.8592 \times 10^{-3}$             | $0.6796 \times 10^{-3}$             | 26.423         | 6     | $F_2$ | 2          | 6    | $F_1$ | 162       |
| 5860.513641                    | 5860.501951                    | 11.690                                                | $0.9989 \times 10^{-3}$             | $0.7458 \times 10^{-3}$             | 33.928         | 6     | $F_1$ | 1          | 6    | $F_2$ | 168       |
| 5860.574460                    | 5860.589144                    | -14.684                                               |                                     | $0.4803 \times 10^{-4}$             |                | 2     | $F_2$ | 1          | 3    | $F_1$ | 83        |
| 5860.726594                    | 5860.746333                    | -19.739                                               | $0.2202 \times 10^{-2}$             | $0.1909 \times 10^{-2}$             | 15.327         | 4     | $A_1$ | 1          | 5    | $A_2$ | 42        |
| 5861.094000                    | 5861.057837                    | 36.163                                                |                                     | $0.5650 \times 10^{-3}$             |                | 6     | $F_2$ | 2          | 7    | $F_1$ | 162       |
| 5861.114000                    | 5861.079553                    | 34.447                                                |                                     | $0.7543 \times 10^{-3}$             |                | 6     | $F_2$ | 1          | 7    | $F_1$ | 162       |
| 5861.285260                    | 5861.220964                    | 64.296                                                | $0.1736 \times 10^{-3}$             | $0.1868 \times 10^{-3}$             | -7.055         | 6     | $F_1$ | 1          | 7    | $F_2$ | 158       |
| 5861.612680                    | 5861.547307                    | 65.373                                                | $0.9017 \times 10^{-4}$             | $0.8907 \times 10^{-4}$             | 1.236          | 2     | $F_2$ | 1          | 2    | $F_1$ | 62        |
| 5861.987500                    | 5861.959272                    | 28.228                                                | $0.6116 \times 10^{-4}$             | $0.6807 \times 10^{-4}$             | -10.154        | 2     | $E$   | 1          | 2    | $E$   | 45        |
| 5862.275810                    | 5862.277199                    | -1.389                                                |                                     | $0.5690 \times 10^{-4}$             |                | 6     | $F_2$ | 1          | 7    | $F_1$ | 163       |
| 5862.368280                    | 5862.382570                    | -14.290                                               | $0.5228 \times 10^{-3}$             | $0.7655 \times 10^{-3}$             | -31.707        | 6     | $F_2$ | 2          | 6    | $F_1$ | 164       |
| 5862.390130                    | 5862.404286                    | -14.156                                               |                                     | $0.5011 \times 10^{-3}$             |                | 6     | $F_2$ | 1          | 6    | $F_1$ | 164       |
| 5862.809543                    | 5862.890209                    | -80.666                                               |                                     | $0.1780 \times 10^{-2}$             |                | 6     | $A_2$ | 1          | 7    | $A_1$ | 51        |
| 5863.002620                    | 5862.983741                    | 18.879                                                | $0.8846 \times 10^{-3}$             | $0.7542 \times 10^{-3}$             | 17.293         | 6     | $F_2$ | 2          | 7    | $F_1$ | 164       |
| 5862.984820                    | 5862.996093                    | -11.273                                               | $0.8621 \times 10^{-4}$             | $0.7588 \times 10^{-4}$             | 13.617         | 4     | $F_2$ | 1          | 5    | $F_1$ | 126       |
| 5863.026710                    | 5863.005457                    | 21.253                                                |                                     | $0.4507 \times 10^{-3}$             |                | 6     | $F_2$ | 1          | 7    | $F_1$ | 164       |
| 5862.903165                    | 5863.062636                    | -159.471                                              | $0.9734 \times 10^{-3}$             | $0.9890 \times 10^{-3}$             | -1.582         | 6     | $F_1$ | 1          | 7    | $F_2$ | 159       |



Table II (continued).

| $\tilde{\nu}_e/\text{cm}^{-1}$ | $\tilde{\nu}_c/\text{cm}^{-1}$ | $\tilde{\nu}_e - \tilde{\nu}_c/10^{-3}\text{cm}^{-1}$ | $I_e/\text{cm}^{-2}\text{atm}^{-1}$ | $I_c/\text{cm}^{-2}\text{atm}^{-1}$ | $I_e - I_c/\%$ | $J''$ | $C''$ | $\alpha''$ | $J'$ | $C'$  | $\alpha'$ |
|--------------------------------|--------------------------------|-------------------------------------------------------|-------------------------------------|-------------------------------------|----------------|-------|-------|------------|------|-------|-----------|
| 5863.551722                    | 5863.558510                    | -6.788                                                | $0.2630 \times 10^{-2}$             | $0.2687 \times 10^{-2}$             | -2.109         | 3     | $F_1$ | 1          | 4    | $F_2$ | 103       |
| 5863.748190                    | 5863.737655                    | 10.535                                                | $0.2906 \times 10^{-3}$             | $0.2908 \times 10^{-3}$             | -0.085         | 2     | $F_2$ | 1          | 3    | $F_1$ | 84        |
| 5864.079280                    | 5864.094252                    | -14.972                                               | $0.7070 \times 10^{-2}$             | $0.1789 \times 10^{-2}$             | 295.230        | 3     | $F_2$ | 1          | 4    | $F_1$ | 99        |
| 5864.744792                    | 5864.738966                    | 5.826                                                 | $0.1364 \times 10^{-2}$             | $0.1316 \times 10^{-2}$             | 3.660          | 5     | $F_1$ | 2          | 6    | $F_2$ | 144       |
| 5864.758000                    | 5864.753547                    | 4.453                                                 |                                     | $0.6480 \times 10^{-4}$             |                | 5     | $F_1$ | 1          | 6    | $F_2$ | 144       |
| 5864.862000                    | 5864.882077                    | -20.077                                               |                                     | $0.5912 \times 10^{-4}$             |                | 3     | $F_2$ | 1          | 3    | $F_1$ | 97        |
| 5865.498500                    | 5865.506930                    | -8.430                                                |                                     | $0.2292 \times 10^{-5}$             |                | 2     | $E$   | 1          | 3    | $E$   | 53        |
| 5865.803730                    | 5865.725184                    | 78.546                                                | $0.5698 \times 10^{-4}$             | $0.6836 \times 10^{-4}$             | -16.643        | 3     | $F_1$ | 1          | 3    | $F_2$ | 92        |
| 5865.878890                    | 5865.818227                    | 60.663                                                | $0.3310 \times 10^{-4}$             | $0.3455 \times 10^{-4}$             | -4.193         | 4     | $F_1$ | 1          | 4    | $F_2$ | 122       |
| 5865.830870                    | 5865.831919                    | -1.049                                                |                                     | $0.9496 \times 10^{-4}$             |                | 6     | $E$   | 1          | 6    | $E$   | 114       |
| 5866.166750                    | 5866.192175                    | -25.425                                               |                                     | $0.2890 \times 10^{-3}$             |                | 7     | $F_1$ | 1          | 8    | $F_2$ | 180       |
| 5866.576740                    | 5866.563780                    | 12.960                                                |                                     | $0.6656 \times 10^{-4}$             |                | 6     | $F_2$ | 2          | 6    | $F_1$ | 167       |
| 5866.596000                    | 5866.585496                    | 10.504                                                |                                     | $0.2636 \times 10^{-4}$             |                | 6     | $F_2$ | 1          | 6    | $F_1$ | 167       |
| 5866.626026                    | 5866.629938                    | -3.912                                                | $0.4037 \times 10^{-3}$             | $0.4053 \times 10^{-3}$             | -0.399         | 1     | $F_1$ | 1          | 2    | $F_2$ | 63        |
| 5866.730341                    | 5866.729911                    | 0.430                                                 | $0.1321 \times 10^{-2}$             | $0.1042 \times 10^{-2}$             | 26.744         | 12    | $A_1$ | 1          | 11   | $A_2$ | 118       |
| 5866.777419                    | 5866.808604                    | -31.185                                               | $0.1016 \times 10^{-2}$             | $0.8976 \times 10^{-3}$             | 13.186         | 5     | $F_1$ | 1          | 6    | $F_2$ | 145       |
| 5866.830319                    | 5866.867547                    | -37.228                                               | $0.4203 \times 10^{-3}$             | $0.4173 \times 10^{-3}$             | 0.715          | 5     | $E$   | 1          | 6    | $E$   | 97        |
| 5867.234866                    | 5867.254115                    | -19.249                                               |                                     | $0.9727 \times 10^{-5}$             |                | 4     | $E$   | 1          | 5    | $E$   | 81        |
| 5867.348780                    | 5867.377819                    | -29.039                                               |                                     | $0.5117 \times 10^{-3}$             |                | 7     | $F_2$ | 2          | 7    | $F_1$ | 196       |
| 5867.386840                    | 5867.415838                    | -28.998                                               |                                     | $0.2091 \times 10^{-3}$             |                | 7     | $F_2$ | 1          | 7    | $F_1$ | 196       |
| 5867.776000                    | 5867.791116                    | -15.116                                               |                                     | $0.9986 \times 10^{-7}$             |                | 4     | $F_2$ | 1          | 5    | $F_1$ | 127       |
| 5868.102147                    | 5868.104099                    | -1.952                                                | $0.3369 \times 10^{-3}$             | $0.3112 \times 10^{-3}$             | 8.276          | 3     | $F_1$ | 1          | 4    | $F_2$ | 104       |
| 5868.290598                    | 5868.256524                    | 34.074                                                |                                     | $0.8720 \times 10^{-3}$             |                | 12    | $A_2$ | 1          | 11   | $A_1$ | 111       |
| 5868.248449                    | 5868.265494                    | -17.045                                               | $0.8386 \times 10^{-3}$             | $0.6518 \times 10^{-3}$             | 28.663         | 6     | $F_1$ | 1          | 7    | $F_2$ | 161       |
| 5868.336980                    | 5868.312763                    | 24.217                                                | $0.2806 \times 10^{-3}$             | $0.4807 \times 10^{-3}$             | -41.621        | 12    | $F_2$ | 3          | 11   | $F_1$ | 350       |
| 5868.586610                    | 5868.560787                    | 25.823                                                |                                     | $0.4739 \times 10^{-4}$             |                | 5     | $F_1$ | 2          | 6    | $F_2$ | 146       |
| 5869.030170                    | 5869.059802                    | -29.632                                               |                                     | $0.4103 \times 10^{-3}$             |                | 3     | $A_2$ | 1          | 4    | $A_1$ | 38        |
| 5869.095050                    | 5869.103890                    | -8.840                                                |                                     | $0.3733 \times 10^{-3}$             |                | 1     | $F_1$ | 1          | 2    | $F_2$ | 64        |
| 5869.185122                    | 5869.186056                    | -0.934                                                | $0.1677 \times 10^{-2}$             | $0.1688 \times 10^{-2}$             | -0.638         | 6     | $A_2$ | 1          | 7    | $A_1$ | 52        |
| 5869.341170                    | 5869.306605                    | 34.565                                                |                                     | $0.1463 \times 10^{-3}$             |                | 12    | $A_1$ | 2          | 11   | $A_2$ | 120       |
| 5869.793620                    | 5869.779877                    | 13.743                                                | $0.1456 \times 10^{-3}$             | $0.2051 \times 10^{-3}$             | -29.006        | 6     | $F_2$ | 2          | 7    | $F_1$ | 166       |
| 5869.815562                    | 5869.801594                    | 13.968                                                | $0.4178 \times 10^{-3}$             | $0.3866 \times 10^{-3}$             | 8.071          | 6     | $F_2$ | 1          | 7    | $F_1$ | 166       |
| 5870.155607                    | 5870.169831                    | -14.224                                               |                                     | $0.1717 \times 10^{-2}$             |                | 6     | $A_1$ | 1          | 7    | $A_2$ | 57        |
| 5870.678540                    | 5870.670398                    | 8.142                                                 |                                     | $0.2371 \times 10^{-3}$             |                | 8     | $E$   | 2          | 9    | $E$   | 130       |
| 5870.764885                    | 5870.756040                    | 8.845                                                 |                                     | $0.4542 \times 10^{-6}$             |                | 8     | $E$   | 1          | 9    | $E$   | 130       |
| 5871.144540                    | 5871.146722                    | -2.182                                                |                                     | $0.3871 \times 10^{-3}$             |                | 7     | $F_2$ | 2          | 7    | $F_1$ | 199       |
| 5871.179990                    | 5871.184741                    | -4.751                                                |                                     | $0.1211 \times 10^{-3}$             |                | 7     | $F_2$ | 1          | 7    | $F_1$ | 199       |
| 5871.557000                    | 5871.542545                    | 14.455                                                |                                     | $0.2264 \times 10^{-5}$             |                | 2     | $E$   | 1          | 3    | $E$   | 54        |
| 5872.618778                    | 5872.602719                    | 16.059                                                | $0.2630 \times 10^{-2}$             | $0.2572 \times 10^{-2}$             | 2.256          | 3     | $A_2$ | 1          | 4    | $A_1$ | 39        |
| 5872.828010                    | 5872.832042                    | -4.032                                                |                                     | $0.5753 \times 10^{-2}$             |                | 4     | $A_1$ | 1          | 5    | $A_2$ | 43        |
| 5873.144955                    | 5873.151614                    | -6.659                                                | $0.2777 \times 10^{-2}$             | $0.2755 \times 10^{-2}$             | 0.795          | 4     | $F_1$ | 1          | 5    | $F_2$ | 121       |
| 5873.285960                    | 5873.270536                    | 15.424                                                | $0.6825 \times 10^{-3}$             | $0.7110 \times 10^{-3}$             | -4.005         | 3     | $F_2$ | 1          | 4    | $F_1$ | 101       |
| 5873.444460                    | 5873.410733                    | 33.727                                                |                                     | $0.2716 \times 10^{-3}$             |                | 6     | $F_2$ | 2          | 7    | $F_1$ | 167       |
| 5873.464112                    | 5873.432450                    | 31.662                                                |                                     | $0.4150 \times 10^{-3}$             |                | 6     | $F_2$ | 1          | 7    | $F_1$ | 167       |
| 5873.503888                    | 5873.516906                    | -13.018                                               | $0.1691 \times 10^{-2}$             | $0.1636 \times 10^{-2}$             | 3.365          | 4     | $E$   | 1          | 5    | $E$   | 82        |
| 5873.698880                    | 5873.887443                    | -188.563                                              | $0.9989 \times 10^{-4}$             | $0.4075 \times 10^{-4}$             | 145.149        | 1     | $F_1$ | 1          | 2    | $F_2$ | 65        |
| 5874.173150                    | 5874.165884                    | 7.266                                                 |                                     | $0.5061 \times 10^{-4}$             |                | 3     | $F_1$ | 1          | 4    | $F_2$ | 105       |
| 5874.360050                    | 5874.360834                    | -0.784                                                | $0.5959 \times 10^{-4}$             | $0.8742 \times 10^{-4}$             | -31.831        | 1     | $F_1$ | 1          | 2    | $F_2$ | 66        |
| 5875.264331                    | 5875.288511                    | -24.180                                               |                                     | $0.5145 \times 10^{-3}$             |                | 8     | $F_2$ | 1          | 8    | $F_1$ | 221       |
| 5875.374310                    | 5875.309677                    | 64.633                                                |                                     | $0.1434 \times 10^{-3}$             |                | 7     | $A_2$ | 1          | 7    | $A_1$ | 65        |

Table II (continued).

| $\tilde{\nu}_e/\text{cm}^{-1}$ | $\tilde{\nu}_c/\text{cm}^{-1}$ | $\tilde{\nu}_e - \tilde{\nu}_c/10^{-3}\text{cm}^{-1}$ | $I_e/\text{cm}^{-2}\text{atm}^{-1}$ | $I_c/\text{cm}^{-2}\text{atm}^{-1}$ | $I_e - I_c/\%$ | $J''$ | $C''$ | $\alpha''$ | $J'$ | $C'$  | $\alpha'$ |
|--------------------------------|--------------------------------|-------------------------------------------------------|-------------------------------------|-------------------------------------|----------------|-------|-------|------------|------|-------|-----------|
| 5875.334523                    | 5875.321417                    | 13.106                                                |                                     | $0.2334 \times 10^{-5}$             |                | 3     | $F_2$ | 1          | 4    | $F_1$ | 102       |
| 5875.839840                    | 5875.868447                    | -28.607                                               | $0.4734 \times 10^{-4}$             | $0.5370 \times 10^{-4}$             | -11.851        | 2     | $F_2$ | 1          | 3    | $F_1$ | 86        |
| 5876.517090                    | 5876.548690                    | -31.600                                               |                                     | $0.3052 \times 10^{-3}$             |                | 2     | $E$   | 1          | 3    | $E$   | 55        |
| 5878.165500                    | 5878.207441                    | -41.941                                               | $0.1004 \times 10^{-2}$             | $0.7990 \times 10^{-3}$             | 25.653         | 2     | $F_2$ | 1          | 3    | $F_1$ | 87        |
| 5878.473850                    | 5878.497170                    | -23.320                                               | $0.1879 \times 10^{-3}$             | $0.1704 \times 10^{-3}$             | 10.287         | 4     | $F_1$ | 1          | 5    | $F_2$ | 123       |
| 5878.767239                    | 5878.775608                    | -8.369                                                | $0.5289 \times 10^{-3}$             | $0.4234 \times 10^{-3}$             | 24.916         | 4     | $A_1$ | 1          | 5    | $A_2$ | 44        |
| 5878.820140                    | 5878.812261                    | 7.879                                                 | $0.8624 \times 10^{-4}$             | $0.1395 \times 10^{-4}$             | 518.171        | 11    | $F_2$ | 2          | 10   | $F_1$ | 313       |
| 5878.972101                    | 5878.956318                    | 15.783                                                |                                     | $0.1667 \times 10^{-4}$             |                | 3     | $F_1$ | 1          | 4    | $F_2$ | 107       |
| 5878.931065                    | 5878.968995                    | -37.930                                               | $0.1415 \times 10^{-2}$             | $0.1354 \times 10^{-2}$             | 4.533          | 11    | $F_1$ | 1          | 10   | $F_2$ | 320       |
| 5878.988153                    | 5878.981441                    | 6.712                                                 | $0.1279 \times 10^{-2}$             | $0.1337 \times 10^{-2}$             | -4.373         | 11    | $F_2$ | 1          | 10   | $F_1$ | 313       |
| 5879.109490                    | 5879.093744                    | 15.746                                                | $0.2141 \times 10^{-2}$             | $0.2104 \times 10^{-2}$             | 1.752          | 11    | $A_2$ | 1          | 10   | $A_1$ | 109       |
| 5879.179120                    | 5879.160283                    | 18.837                                                | $0.2111 \times 10^{-3}$             | $0.1800 \times 10^{-3}$             | 17.277         | 9     | $E$   | 1          | 9    | $E$   | 167       |
| 5879.310300                    | 5879.317793                    | -7.493                                                |                                     | $0.1171 \times 10^{-2}$             |                | 11    | $F_2$ | 2          | 10   | $F_1$ | 314       |
| 5879.425443                    | 5879.457659                    | -32.216                                               |                                     | $0.7982 \times 10^{-3}$             |                | 11    | $E$   | 1          | 10   | $E$   | 213       |
| 5879.534785                    | 5879.577301                    | -42.516                                               |                                     | $0.6143 \times 10^{-5}$             |                | 11    | $F_1$ | 2          | 10   | $F_2$ | 321       |
| 5879.643620                    | 5879.620807                    | 22.813                                                | $0.2488 \times 10^{-3}$             | $0.2158 \times 10^{-3}$             | 15.312         | 2     | $E$   | 1          | 3    | $E$   | 56        |
| 5879.684298                    | 5879.689265                    | -4.967                                                | $0.1162 \times 10^{-2}$             | $0.1176 \times 10^{-2}$             | -1.232         | 11    | $F_2$ | 3          | 10   | $F_1$ | 315       |
| 5879.803453                    | 5879.749464                    | 53.989                                                |                                     | $0.4430 \times 10^{-5}$             |                | 11    | $F_1$ | 3          | 10   | $F_2$ | 322       |
| 5880.148162                    | 5880.160867                    | -12.705                                               | $0.3476 \times 10^{-3}$             | $0.2981 \times 10^{-3}$             | 16.589         | 7     | $F_1$ | 1          | 8    | $F_2$ | 188       |
| 5881.805000                    | 5881.776387                    | 28.613                                                |                                     | $0.4783 \times 10^{-4}$             |                | 11    | $F_2$ | 3          | 10   | $F_1$ | 316       |
| 5881.856445                    | 5881.795615                    | 60.830                                                |                                     | $0.8985 \times 10^{-4}$             |                | 11    | $A_2$ | 1          | 10   | $A_1$ | 110       |
| 5881.911768                    | 5881.977977                    | -66.209                                               |                                     | $0.5536 \times 10^{-5}$             |                | 2     | $F_2$ | 1          | 3    | $F_1$ | 88        |
| 5882.300000                    | 5882.312698                    | -12.698                                               |                                     | $0.8673 \times 10^{-5}$             |                | 5     | $F_1$ | 2          | 6    | $F_2$ | 149       |
| 5882.318218                    | 5882.327278                    | -9.060                                                |                                     | $0.3064 \times 10^{-2}$             |                | 5     | $F_1$ | 1          | 6    | $F_2$ | 149       |
| 5882.648593                    | 5882.649441                    | -0.848                                                | $0.2730 \times 10^{-2}$             | $0.2593 \times 10^{-2}$             | 5.281          | 5     | $F_2$ | 1          | 6    | $F_1$ | 143       |
| 5883.103441                    | 5883.114086                    | -10.645                                               | $0.3621 \times 10^{-3}$             | $0.6132 \times 10^{-3}$             | -40.951        | 9     | $F_1$ | 3          | 10   | $F_2$ | 223       |
| 5883.152970                    | 5883.163805                    | -10.835                                               |                                     | $0.6253 \times 10^{-4}$             |                | 9     | $F_1$ | 2          | 10   | $F_2$ | 223       |
| 5883.240710                    | 5883.252127                    | -11.417                                               |                                     | $0.2025 \times 10^{-4}$             |                | 9     | $F_1$ | 1          | 10   | $F_2$ | 223       |
| 5883.527810                    | 5883.511687                    | 16.123                                                | $0.3540 \times 10^{-3}$             | $0.3839 \times 10^{-3}$             | -7.789         | 4     | $F_1$ | 1          | 5    | $F_2$ | 124       |
| 5884.078845                    | 5884.062431                    | 16.414                                                | $0.5717 \times 10^{-4}$             | $0.4381 \times 10^{-4}$             | 30.487         | 4     | $F_1$ | 1          | 5    | $F_2$ | 125       |
| 5884.128613                    | 5884.144028                    | -15.415                                               |                                     | $0.7082 \times 10^{-6}$             |                | 6     | $F_1$ | 1          | 7    | $F_2$ | 167       |
| 5884.465700                    | 5884.459188                    | 6.512                                                 |                                     | $0.2130 \times 10^{-3}$             |                | 4     | $F_2$ | 1          | 5    | $F_1$ | 131       |
| 5884.961070                    | 5884.883636                    | 77.434                                                | $0.1472 \times 10^{-3}$             | $0.1632 \times 10^{-3}$             | -9.826         | 1     | $F_1$ | 1          | 2    | $F_2$ | 69        |
| 5884.907640                    | 5884.907345                    | 0.295                                                 | $0.7794 \times 10^{-4}$             | $0.4584 \times 10^{-4}$             | 70.013         | 5     | $F_2$ | 1          | 6    | $F_1$ | 144       |
| 5885.299000                    | 5885.299182                    | -0.182                                                |                                     | $0.5357 \times 10^{-4}$             |                | 10    | $F_2$ | 2          | 9    | $F_1$ | 291       |
| 5885.392560                    | 5885.405929                    | -13.369                                               |                                     | $0.1993 \times 10^{-6}$             |                | 11    | $F_2$ | 2          | 12   | $F_1$ | 246       |
| 5886.350720                    | 5886.332719                    | 18.001                                                | $0.5984 \times 10^{-3}$             | $0.5710 \times 10^{-3}$             | 4.806          | 8     | $A_1$ | 1          | 9    | $A_2$ | 70        |
| 5887.417110                    | 5887.459084                    | -41.974                                               |                                     | $0.3181 \times 10^{-3}$             |                | 3     | $F_1$ | 1          | 4    | $F_2$ | 109       |
| 5887.673900                    | 5887.734357                    | -60.457                                               |                                     | $0.1017 \times 10^{-3}$             |                | 2     | $E$   | 1          | 3    | $E$   | 59        |
| 5888.038740                    | 5888.027601                    | 11.139                                                | $0.1694 \times 10^{-3}$             | $0.1609 \times 10^{-3}$             | 5.287          | 3     | $F_1$ | 1          | 4    | $F_2$ | 110       |
| 5888.177400                    | 5888.189200                    | -11.800                                               |                                     | $0.3823 \times 10^{-4}$             |                | 5     | $F_1$ | 2          | 6    | $F_2$ | 151       |
| 5888.189620                    | 5888.203780                    | -14.160                                               |                                     | $0.9601 \times 10^{-4}$             |                | 5     | $F_1$ | 1          | 6    | $F_2$ | 151       |
| 5888.448910                    | 5888.472798                    | -23.888                                               | $0.5969 \times 10^{-3}$             | $0.5519 \times 10^{-3}$             | 8.159          | 3     | $F_2$ | 1          | 4    | $F_1$ | 105       |
| 5888.748675                    | 5888.733419                    | 15.256                                                |                                     | $0.2682 \times 10^{-4}$             |                | 4     | $F_1$ | 1          | 5    | $F_2$ | 127       |
| 5889.016691                    | 5889.045302                    | -28.611                                               | $0.1826 \times 10^{-2}$             | $0.1916 \times 10^{-2}$             | -4.679         | 3     | $A_2$ | 1          | 4    | $A_1$ | 40        |
| 5889.093114                    | 5889.106729                    | -13.615                                               |                                     | $0.3243 \times 10^{-4}$             |                | 7     | $A_2$ | 1          | 6    | $A_1$ | 68        |
| 5889.096900                    | 5889.106729                    | -9.829                                                |                                     | $0.3243 \times 10^{-4}$             |                | 7     | $A_2$ | 1          | 6    | $A_1$ | 68        |
| 5889.198550                    | 5889.218383                    | -19.833                                               | $0.3961 \times 10^{-4}$             | $0.4124 \times 10^{-4}$             | -3.952         | 14    | $F_1$ | 3          | 13   | $F_2$ | 420       |
| 5889.313150                    | 5889.317082                    | -3.932                                                |                                     | $0.2779 \times 10^{-4}$             |                | 7     | $F_2$ | 2          | 6    | $F_1$ | 189       |
| 5889.619580                    | 5889.584721                    | 34.859                                                | $0.3239 \times 10^{-3}$             | $0.3114 \times 10^{-3}$             | 4.019          | 3     | $F_2$ | 1          | 4    | $F_1$ | 106       |

Table II (continued).

| $\tilde{\nu}_e/\text{cm}^{-1}$ | $\tilde{\nu}_c/\text{cm}^{-1}$ | $\tilde{\nu}_e - \tilde{\nu}_c/10^{-3}\text{cm}^{-1}$ | $I_e/\text{cm}^{-2}\text{atm}^{-1}$ | $I_c/\text{cm}^{-2}\text{atm}^{-1}$ | $I_e - I_c/\%$ | $J''$ | $C''$ | $\alpha''$ | $J'$ | $C'$  | $\alpha'$ |
|--------------------------------|--------------------------------|-------------------------------------------------------|-------------------------------------|-------------------------------------|----------------|-------|-------|------------|------|-------|-----------|
| 5889.665110                    | 5889.677686                    | -12.576                                               | $0.4912 \times 10^{-4}$             | $0.4676 \times 10^{-4}$             | 5.045          | 14    | $F_2$ | 3          | 13   | $F_1$ | 429       |
| 5890.299580                    | 5890.303904                    | -4.324                                                | $0.2080 \times 10^{-3}$             | $0.1852 \times 10^{-3}$             | 12.331         | 3     | $F_1$ | 1          | 4    | $F_2$ | 111       |
| 5890.524780                    | 5890.530563                    | -5.783                                                |                                     | $0.5739 \times 10^{-4}$             |                | 14    | $A_1$ | 1          | 13   | $A_2$ | 144       |
| 5891.377562                    | 5891.354586                    | 22.976                                                | $0.2273 \times 10^{-2}$             | $0.2069 \times 10^{-2}$             | 9.868          | 10    | $F_1$ | 1          | 9    | $F_2$ | 285       |
| 5891.341965                    | 5891.356159                    | -14.194                                               | $0.2193 \times 10^{-2}$             | $0.2134 \times 10^{-2}$             | 2.777          | 10    | $F_2$ | 2          | 9    | $F_1$ | 294       |
| 5891.456671                    | 5891.529933                    | -73.262                                               |                                     | $0.3523 \times 10^{-2}$             |                | 10    | $A_1$ | 1          | 9    | $A_2$ | 99        |
| 5891.582759                    | 5891.563425                    | 19.334                                                | $0.2096 \times 10^{-2}$             | $0.2042 \times 10^{-2}$             | 2.665          | 10    | $F_1$ | 2          | 9    | $F_2$ | 286       |
| 5891.613970                    | 5891.595935                    | 18.035                                                | $0.1450 \times 10^{-2}$             | $0.1417 \times 10^{-2}$             | 2.308          | 10    | $E$   | 2          | 9    | $E$   | 192       |
| 5891.645029                    | 5891.659655                    | -14.626                                               | $0.2222 \times 10^{-2}$             | $0.2104 \times 10^{-2}$             | 5.630          | 10    | $F_2$ | 3          | 9    | $F_1$ | 295       |
| 5891.663139                    | 5891.672946                    | -9.807                                                |                                     | $0.4801 \times 10^{-4}$             |                | 3     | $F_1$ | 1          | 4    | $F_2$ | 112       |
| 5891.742290                    | 5891.752600                    | -10.310                                               | $0.1141 \times 10^{-2}$             | $0.1099 \times 10^{-2}$             | 3.790          | 5     | $E$   | 1          | 6    | $E$   | 101       |
| 5891.754710                    | 5891.759726                    | -5.016                                                | $0.9898 \times 10^{-3}$             | $0.1213 \times 10^{-2}$             | -18.370        | 5     | $F_1$ | 2          | 6    | $F_2$ | 152       |
| 5891.766740                    | 5891.774307                    | -7.567                                                |                                     | $0.1969 \times 10^{-3}$             |                | 5     | $F_1$ | 1          | 6    | $F_2$ | 152       |
| 5891.796160                    | 5891.789379                    | 6.781                                                 | $0.4665 \times 10^{-2}$             | $0.3854 \times 10^{-2}$             | 21.051         | 6     | $A_2$ | 1          | 7    | $A_1$ | 53        |
| 5892.278210                    | 5892.281706                    | -3.496                                                |                                     | $0.1776 \times 10^{-3}$             |                | 6     | $F_2$ | 1          | 7    | $F_1$ | 172       |
| 5892.929902                    | 5892.913187                    | 16.715                                                | $0.1142 \times 10^{-3}$             | $0.1378 \times 10^{-3}$             | -17.104        | 3     | $F_2$ | 1          | 4    | $F_1$ | 107       |
| 5893.221624                    | 5893.217588                    | 4.036                                                 |                                     | $0.4075 \times 10^{-4}$             |                | 5     | $F_2$ | 1          | 6    | $F_1$ | 145       |
| 5893.399728                    | 5893.406924                    | -7.196                                                |                                     | $0.1087 \times 10^{-3}$             |                | 3     | $F_1$ | 1          | 4    | $F_2$ | 113       |
| 5893.503750                    | 5893.513671                    | -9.921                                                |                                     | $0.1751 \times 10^{-4}$             |                | 4     | $F_1$ | 1          | 5    | $F_2$ | 128       |
| 5893.863360                    | 5893.867847                    | -4.487                                                | $0.5876 \times 10^{-3}$             | $0.4980 \times 10^{-3}$             | 18.001         | 5     | $F_2$ | 1          | 6    | $F_1$ | 146       |
| 5893.921514                    | 5893.917410                    | 4.104                                                 | $0.4090 \times 10^{-3}$             | $0.3751 \times 10^{-3}$             | 9.025          | 5     | $E$   | 1          | 6    | $E$   | 102       |
| 5894.443398                    | 5894.435735                    | 7.663                                                 | $0.8969 \times 10^{-3}$             | $0.8767 \times 10^{-3}$             | 2.303          | 5     | $F_1$ | 2          | 6    | $F_2$ | 153       |
| 5894.455000                    | 5894.450315                    | 4.685                                                 |                                     | $0.1344 \times 10^{-3}$             |                | 5     | $F_1$ | 1          | 6    | $F_2$ | 153       |
| 5895.123500                    | 5895.124791                    | -1.291                                                |                                     | $0.1266 \times 10^{-4}$             |                | 13    | $F_1$ | 2          | 12   | $F_2$ | 392       |
| 5896.120400                    | 5896.115067                    | 5.333                                                 | $0.5896 \times 10^{-5}$             | $0.6382 \times 10^{-5}$             | -7.620         | 2     | $E$   | 1          | 3    | $E$   | 62        |
| 5896.171940                    | 5896.162248                    | 9.692                                                 | $0.1422 \times 10^{-3}$             | $0.1282 \times 10^{-3}$             | 10.957         | 3     | $F_1$ | 1          | 4    | $F_2$ | 114       |
| 5896.296631                    | 5896.316523                    | -19.892                                               |                                     | $0.9171 \times 10^{-5}$             |                | 2     | $F_2$ | 1          | 3    | $F_1$ | 97        |
| 5896.754490                    | 5896.738561                    | 15.929                                                |                                     | $0.1795 \times 10^{-4}$             |                | 6     | $E$   | 1          | 7    | $E$   | 113       |
| 5896.881470                    | 5896.881376                    | 0.094                                                 | $0.2652 \times 10^{-3}$             | $0.2994 \times 10^{-3}$             | -11.410        | 3     | $F_1$ | 1          | 4    | $F_2$ | 115       |
| 5896.963740                    | 5896.957821                    | 5.919                                                 | $0.5103 \times 10^{-4}$             | $0.5968 \times 10^{-4}$             | -14.496        | 3     | $F_2$ | 1          | 4    | $F_1$ | 109       |
| 5897.038500                    | 5897.025121                    | 13.379                                                |                                     | $0.2725 \times 10^{-4}$             |                | 6     | $F_2$ | 2          | 5    | $F_1$ | 167       |
| 5897.200650                    | 5897.193365                    | 7.285                                                 | $0.2747 \times 10^{-4}$             | $0.3365 \times 10^{-4}$             | -18.358        | 6     | $F_1$ | 1          | 5    | $F_2$ | 160       |
| 5897.472360                    | 5897.489391                    | -17.031                                               |                                     | $0.7483 \times 10^{-4}$             |                | 6     | $A_1$ | 1          | 5    | $A_2$ | 57        |
| 5897.489080                    | 5897.496893                    | -7.813                                                |                                     | $0.4778 \times 10^{-4}$             |                | 4     | $F_2$ | 1          | 5    | $F_1$ | 136       |
| 5897.808500                    | 5897.783657                    | 24.843                                                |                                     | $0.1526 \times 10^{-5}$             |                | 3     | $F_2$ | 1          | 4    | $F_1$ | 111       |
| 5897.939120                    | 5897.944048                    | -4.928                                                |                                     | $0.1826 \times 10^{-3}$             |                | 4     | $F_1$ | 1          | 5    | $F_2$ | 129       |
| 5898.191870                    | 5898.178422                    | 13.448                                                |                                     | $0.5916 \times 10^{-3}$             |                | 4     | $A_1$ | 1          | 5    | $A_2$ | 46        |
| 5898.855500                    | 5898.859769                    | -4.269                                                |                                     | $0.1379 \times 10^{-4}$             |                | 5     | $F_2$ | 1          | 6    | $F_1$ | 149       |
| 5899.326962                    | 5899.318480                    | 8.482                                                 | $0.9384 \times 10^{-3}$             | $0.8656 \times 10^{-3}$             | 8.413          | 4     | $F_2$ | 1          | 5    | $F_1$ | 137       |
| 5899.359300                    | 5899.352748                    | 6.552                                                 |                                     | $0.5048 \times 10^{-4}$             |                | 4     | $A_1$ | 1          | 5    | $A_2$ | 47        |
| 5899.971000                    | 5899.924833                    | 46.167                                                | $0.7828 \times 10^{-3}$             | $0.9592 \times 10^{-3}$             | -18.392        | 3     | $A_2$ | 1          | 4    | $A_1$ | 42        |
| 5900.167960                    | 5900.182829                    | -14.869                                               | $0.4122 \times 10^{-3}$             | $0.3994 \times 10^{-3}$             | 3.217          | 4     | $E$   | 1          | 5    | $E$   | 88        |
| 5900.316976                    | 5900.324495                    | -7.519                                                | $0.2219 \times 10^{-2}$             | $0.2234 \times 10^{-2}$             | -0.692         | 7     | $F_1$ | 1          | 8    | $F_2$ | 193       |
| 5900.458421                    | 5900.458849                    | -0.428                                                | $0.2018 \times 10^{-2}$             | $0.2046 \times 10^{-2}$             | -1.374         | 7     | $F_2$ | 1          | 8    | $F_1$ | 189       |
| 5900.492250                    | 5900.495526                    | -3.276                                                | $0.5465 \times 10^{-4}$             | $0.5177 \times 10^{-4}$             | 5.553          | 13    | $E$   | 2          | 12   | $E$   | 263       |
| 5900.644780                    | 5900.647935                    | -3.155                                                | $0.6818 \times 10^{-4}$             | $0.6765 \times 10^{-4}$             | 0.783          | 13    | $F_2$ | 3          | 12   | $F_1$ | 389       |
| 5900.899166                    | 5900.915277                    | -16.111                                               | $0.1314 \times 10^{-2}$             | $0.1290 \times 10^{-2}$             | 1.891          | 6     | $F_2$ | 2          | 7    | $F_1$ | 175       |
| 5900.920000                    | 5900.936993                    | -16.993                                               | $0.2936 \times 10^{-3}$             | $0.2352 \times 10^{-3}$             | 24.854         | 6     | $F_2$ | 1          | 7    | $F_1$ | 175       |
| 5900.989540                    | 5900.986660                    | 2.880                                                 | $0.1380 \times 10^{-3}$             | $0.1364 \times 10^{-3}$             | 1.155          | 13    | $A_2$ | 1          | 12   | $A_1$ | 136       |
| 5901.240747                    | 5901.250139                    | -9.392                                                |                                     | $0.9617 \times 10^{-3}$             |                | 6     | $F_1$ | 1          | 7    | $F_2$ | 170       |

Table II (continued).

| $\tilde{\nu}_e/\text{cm}^{-1}$ | $\tilde{\nu}_c/\text{cm}^{-1}$ | $\tilde{\nu}_e - \tilde{\nu}_c/10^{-3}\text{cm}^{-1}$ | $I_e/\text{cm}^{-2}\text{atm}^{-1}$ | $I_c/\text{cm}^{-2}\text{atm}^{-1}$ | $I_e - I_c/\%$ | $J''$ | $C''$ | $\alpha''$ | $J'$ | $C'$  | $\alpha'$ |
|--------------------------------|--------------------------------|-------------------------------------------------------|-------------------------------------|-------------------------------------|----------------|-------|-------|------------|------|-------|-----------|
| 5901.336430                    | 5901.363764                    | -27.334                                               | $0.2280 \times 10^{-3}$             | $0.1574 \times 10^{-3}$             | 44.829         | 3     | $F_1$ | 1          | 4    | $F_2$ | 118       |
| 5901.530460                    | 5901.531438                    | -0.978                                                | $0.4359 \times 10^{-4}$             | $0.5460 \times 10^{-4}$             | -20.170        | 13    | $F_2$ | 2          | 12   | $F_1$ | 390       |
| 5901.591023                    | 5901.609911                    | -18.888                                               |                                     | $0.3794 \times 10^{-4}$             |                | 4     | $F_2$ | 1          | 5    | $F_1$ | 138       |
| 5901.640270                    | 5901.633630                    | 6.640                                                 | $0.4929 \times 10^{-4}$             | $0.5990 \times 10^{-4}$             | -17.714        | 13    | $F_1$ | 3          | 12   | $F_2$ | 395       |
| 5901.657000                    | 5901.642134                    | 14.866                                                |                                     | $0.2024 \times 10^{-4}$             |                | 7     | $F_1$ | 1          | 8    | $F_2$ | 194       |
| 5902.054620                    | 5902.072557                    | -17.937                                               |                                     | $0.5429 \times 10^{-4}$             |                | 6     | $F_1$ | 1          | 7    | $F_2$ | 171       |
| 5902.221840                    | 5902.224007                    | -2.167                                                |                                     | $0.1575 \times 10^{-3}$             |                | 6     | $E$   | 1          | 7    | $E$   | 114       |
| 5902.291810                    | 5902.266304                    | 25.506                                                |                                     | $0.1595 \times 10^{-3}$             |                | 3     | $F_1$ | 1          | 4    | $F_2$ | 119       |
| 5902.563300                    | 5902.573179                    | -9.879                                                |                                     | $0.1066 \times 10^{-3}$             |                | 4     | $F_1$ | 1          | 5    | $F_2$ | 132       |
| 5902.728110                    | 5902.754434                    | -26.324                                               | $0.5519 \times 10^{-4}$             | $0.5207 \times 10^{-4}$             | 5.999          | 13    | $A_1$ | 1          | 12   | $A_2$ | 128       |
| 5902.793343                    | 5902.802645                    | -9.302                                                |                                     | $0.1759 \times 10^{-2}$             |                | 6     | $A_1$ | 1          | 7    | $A_2$ | 60        |
| 5902.949170                    | 5902.918594                    | 30.576                                                | $0.4000 \times 10^{-2}$             | $0.3508 \times 10^{-2}$             | 14.035         | 9     | $F_1$ | 1          | 8    | $F_2$ | 260       |
| 5902.964140                    | 5902.923172                    | 40.968                                                | $0.3856 \times 10^{-2}$             | $0.3512 \times 10^{-2}$             | 9.786          | 9     | $F_2$ | 1          | 8    | $F_1$ | 255       |
| 5903.103560                    | 5903.118604                    | -15.044                                               |                                     | $0.9132 \times 10^{-3}$             |                | 6     | $A_2$ | 1          | 7    | $A_1$ | 54        |
| 5903.158330                    | 5903.167777                    | -9.447                                                | $0.2454 \times 10^{-2}$             | $0.2297 \times 10^{-2}$             | 6.847          | 9     | $E$   | 1          | 8    | $E$   | 174       |
| 5903.179570                    | 5903.181369                    | -1.799                                                | $0.3613 \times 10^{-2}$             | $0.3427 \times 10^{-2}$             | 5.423          | 9     | $F_1$ | 2          | 8    | $F_2$ | 261       |
| 5903.286410                    | 5903.225224                    | 61.186                                                | $0.5822 \times 10^{-2}$             | $0.5759 \times 10^{-2}$             | 1.085          | 9     | $A_1$ | 1          | 8    | $A_2$ | 83        |
| 5903.337670                    | 5903.316374                    | 21.296                                                | $0.3780 \times 10^{-2}$             | $0.3408 \times 10^{-2}$             | 10.928         | 9     | $F_1$ | 3          | 8    | $F_2$ | 262       |
| 5903.362780                    | 5903.346606                    | 16.174                                                | $0.3496 \times 10^{-2}$             | $0.3419 \times 10^{-2}$             | 2.249          | 9     | $F_2$ | 2          | 8    | $F_1$ | 256       |
| 5903.384190                    | 5903.371997                    | 12.193                                                | $0.5734 \times 10^{-2}$             | $0.5691 \times 10^{-2}$             | 0.756          | 9     | $A_2$ | 1          | 8    | $A_1$ | 91        |
| 5903.633970                    | 5903.640665                    | -6.695                                                | $0.6299 \times 10^{-3}$             | $0.6034 \times 10^{-3}$             | 4.389          | 6     | $F_2$ | 2          | 7    | $F_1$ | 177       |
| 5903.656390                    | 5903.662382                    | -5.992                                                |                                     | $0.1818 \times 10^{-3}$             |                | 6     | $F_2$ | 1          | 7    | $F_1$ | 177       |
| 5904.559301                    | 5904.575312                    | -16.011                                               |                                     | $0.3835 \times 10^{-4}$             |                | 4     | $E$   | 1          | 5    | $E$   | 90        |
| 5904.641443                    | 5904.630237                    | 11.206                                                | $0.8817 \times 10^{-3}$             | $0.7668 \times 10^{-3}$             | 14.982         | 6     | $F_1$ | 1          | 7    | $F_2$ | 172       |
| 5904.657985                    | 5904.653687                    | 4.298                                                 |                                     | $0.5008 \times 10^{-4}$             |                | 4     | $F_2$ | 1          | 5    | $F_1$ | 139       |
| 5905.125840                    | 5905.112998                    | 12.842                                                | $0.1969 \times 10^{-4}$             | $0.1755 \times 10^{-4}$             | 12.184         | 5     | $E$   | 1          | 4    | $E$   | 90        |
| 5905.162330                    | 5905.137754                    | 24.576                                                |                                     | $0.2480 \times 10^{-3}$             |                | 6     | $F_1$ | 1          | 7    | $F_2$ | 173       |
| 5905.180000                    | 5905.172915                    | 7.085                                                 |                                     | $0.2763 \times 10^{-4}$             |                | 5     | $F_1$ | 2          | 4    | $F_2$ | 136       |
| 5905.193760                    | 5905.203273                    | -9.513                                                |                                     | $0.1429 \times 10^{-3}$             |                | 4     | $F_1$ | 1          | 5    | $F_2$ | 133       |
| 5905.284340                    | 5905.270996                    | 13.344                                                |                                     | $0.6607 \times 10^{-4}$             |                | 5     | $F_1$ | 2          | 6    | $F_2$ | 158       |
| 5905.296000                    | 5905.285577                    | 10.423                                                |                                     | $0.9160 \times 10^{-5}$             |                | 5     | $F_1$ | 1          | 6    | $F_2$ | 158       |
| 5905.855502                    | 5905.844522                    | 10.980                                                | $0.1469 \times 10^{-2}$             | $0.1438 \times 10^{-2}$             | 2.165          | 6     | $A_1$ | 1          | 7    | $A_2$ | 61        |
| 5905.950961                    | 5905.969445                    | -18.484                                               |                                     | $0.2465 \times 10^{-5}$             |                | 5     | $F_1$ | 1          | 4    | $F_2$ | 137       |
| 5906.005163                    | 5906.006545                    | -1.382                                                |                                     | $0.5603 \times 10^{-4}$             |                | 5     | $E$   | 1          | 6    | $E$   | 105       |
| 5906.051000                    | 5906.026449                    | 24.551                                                |                                     | $0.9303 \times 10^{-5}$             |                | 5     | $F_2$ | 1          | 4    | $F_1$ | 131       |
| 5906.298860                    | 5906.333612                    | -34.752                                               |                                     | $0.8130 \times 10^{-4}$             |                | 6     | $F_2$ | 2          | 7    | $F_1$ | 178       |
| 5906.612120                    | 5906.650461                    | -38.341                                               | $0.9937 \times 10^{-4}$             | $0.9808 \times 10^{-4}$             | 1.316          | 4     | $F_2$ | 1          | 5    | $F_1$ | 140       |
| 5907.276350                    | 5907.278466                    | -2.116                                                |                                     | $0.3414 \times 10^{-4}$             |                | 9     | $A_1$ | 1          | 10   | $A_2$ | 77        |
| 5907.554460                    | 5907.554048                    | 0.412                                                 | $0.8389 \times 10^{-4}$             | $0.8872 \times 10^{-4}$             | -5.440         | 4     | $E$   | 1          | 5    | $E$   | 91        |
| 5907.776890                    | 5907.717141                    | 59.749                                                |                                     | $0.2126 \times 10^{-4}$             |                | 3     | $F_1$ | 1          | 4    | $F_2$ | 122       |
| 5907.919433                    | 5907.926164                    | -6.731                                                | $0.1320 \times 10^{-2}$             | $0.1334 \times 10^{-2}$             | -1.075         | 4     | $A_1$ | 1          | 5    | $A_2$ | 49        |
| 5907.978820                    | 5908.003262                    | -24.442                                               |                                     | $0.1851 \times 10^{-5}$             |                | 7     | $A_2$ | 1          | 8    | $A_1$ | 69        |
| 5908.409400                    | 5908.415693                    | -6.293                                                | $0.3019 \times 10^{-3}$             | $0.3032 \times 10^{-3}$             | -0.423         | 4     | $F_1$ | 1          | 5    | $F_2$ | 135       |
| 5908.914670                    | 5908.913074                    | 1.596                                                 | $0.2848 \times 10^{-2}$             | $0.2922 \times 10^{-2}$             | -2.528         | 8     | $A_1$ | 1          | 9    | $A_2$ | 73        |
| 5909.008691                    | 5909.003900                    | 4.791                                                 | $0.1590 \times 10^{-2}$             | $0.1611 \times 10^{-2}$             | -1.307         | 8     | $F_1$ | 1          | 9    | $F_2$ | 211       |
| 5909.098416                    | 5909.089656                    | 8.760                                                 | $0.1114 \times 10^{-2}$             | $0.1085 \times 10^{-2}$             | 2.626          | 8     | $E$   | 1          | 9    | $E$   | 142       |
| 5909.129870                    | 5909.140449                    | -10.579                                               | $0.3799 \times 10^{-3}$             | $0.4598 \times 10^{-3}$             | -17.383        | 5     | $F_1$ | 2          | 6    | $F_2$ | 160       |
| 5909.226770                    | 5909.235073                    | -8.303                                                | $0.2698 \times 10^{-3}$             | $0.2963 \times 10^{-3}$             | -8.949         | 5     | $E$   | 1          | 6    | $E$   | 106       |
| 5909.396886                    | 5909.408980                    | -12.094                                               |                                     | $0.5043 \times 10^{-5}$             |                | 4     | $F_2$ | 1          | 5    | $F_1$ | 142       |
| 5910.064390                    | 5910.083144                    | -18.754                                               |                                     | $0.3013 \times 10^{-3}$             |                | 7     | $E$   | 1          | 8    | $E$   | 131       |

Table II (continued).

| $\tilde{\nu}_e/\text{cm}^{-1}$ | $\tilde{\nu}_c/\text{cm}^{-1}$ | $\tilde{\nu}_e - \tilde{\nu}_c/10^{-3}\text{cm}^{-1}$ | $I_e/\text{cm}^{-2}\text{atm}^{-1}$ | $I_c/\text{cm}^{-2}\text{atm}^{-1}$ | $I_e - I_c/\%$ | $J''$ | $C''$ | $\alpha''$ | $J'$ | $C'$  | $\alpha'$ |
|--------------------------------|--------------------------------|-------------------------------------------------------|-------------------------------------|-------------------------------------|----------------|-------|-------|------------|------|-------|-----------|
| 5910.125101                    | 5910.143183                    | -18.082                                               | $0.2879 \times 10^{-2}$             | $0.3120 \times 10^{-2}$             | -7.715         | 7     | $A_2$ | 1          | 8    | $A_1$ | 70        |
| 5910.316101                    | 5910.329578                    | -13.477                                               | $0.9003 \times 10^{-3}$             | $0.9701 \times 10^{-3}$             | -7.196         | 7     | $F_2$ | 2          | 8    | $F_1$ | 192       |
| 5910.353740                    | 5910.367597                    | -13.857                                               | $0.9898 \times 10^{-4}$             | $0.1025 \times 10^{-3}$             | -3.440         | 7     | $F_2$ | 1          | 8    | $F_1$ | 192       |
| 5910.447000                    | 5910.426244                    | 20.756                                                |                                     | $0.2141 \times 10^{-4}$             |                | 5     | $F_1$ | 2          | 6    | $F_2$ | 162       |
| 5910.462860                    | 5910.440824                    | 22.036                                                | $0.1747 \times 10^{-3}$             | $0.1375 \times 10^{-3}$             | 27.091         | 5     | $F_1$ | 1          | 6    | $F_2$ | 162       |
| 5910.801000                    | 5910.790033                    | 10.967                                                |                                     | $0.1981 \times 10^{-5}$             |                | 8     | $F_1$ | 1          | 9    | $F_2$ | 213       |
| 5911.228360                    | 5911.242391                    | -14.031                                               |                                     | $0.2166 \times 10^{-3}$             |                | 7     | $F_2$ | 1          | 8    | $F_1$ | 193       |
| 5911.334460                    | 5911.373804                    | -39.344                                               |                                     | $0.3452 \times 10^{-4}$             |                | 4     | $F_1$ | 1          | 5    | $F_2$ | 136       |
| 5911.588300                    | 5911.564943                    | 23.357                                                |                                     | $0.1624 \times 10^{-4}$             |                | 4     | $F_1$ | 1          | 5    | $F_2$ | 137       |
| 5911.611620                    | 5911.614470                    | -2.850                                                | $0.1962 \times 10^{-3}$             | $0.2427 \times 10^{-3}$             | -19.148        | 12    | $A_1$ | 2          | 11   | $A_2$ | 124       |
| 5911.701490                    | 5911.692597                    | 8.893                                                 |                                     | $0.1882 \times 10^{-3}$             |                | 7     | $F_1$ | 2          | 8    | $F_2$ | 197       |
| 5911.756916                    | 5911.748288                    | 8.628                                                 |                                     | $0.1211 \times 10^{-3}$             |                | 7     | $F_1$ | 1          | 8    | $F_2$ | 197       |
| 5911.798540                    | 5911.799068                    | -0.528                                                | $0.1134 \times 10^{-3}$             | $0.1319 \times 10^{-3}$             | -14.036        | 12    | $F_1$ | 3          | 11   | $F_2$ | 359       |
| 5911.984350                    | 5911.982634                    | 1.716                                                 | $0.1062 \times 10^{-3}$             | $0.1137 \times 10^{-3}$             | -6.619         | 12    | $F_2$ | 3          | 11   | $F_1$ | 364       |
| 5912.117690                    | 5912.149927                    | -32.237                                               | $0.3640 \times 10^{-3}$             | $0.2243 \times 10^{-3}$             | 62.271         | 5     | $F_1$ | 2          | 6    | $F_2$ | 163       |
| 5912.312107                    | 5912.284336                    | 27.771                                                | $0.5382 \times 10^{-3}$             | $0.4913 \times 10^{-3}$             | 9.540          | 7     | $E$   | 1          | 8    | $E$   | 132       |
| 5912.378977                    | 5912.347614                    | 31.363                                                | $0.2583 \times 10^{-3}$             | $0.2987 \times 10^{-3}$             | -13.537        | 7     | $F_1$ | 2          | 8    | $F_2$ | 198       |
| 5912.348612                    | 5912.362521                    | -13.909                                               | $0.2794 \times 10^{-3}$             | $0.2400 \times 10^{-3}$             | 16.411         | 4     | $E$   | 1          | 5    | $E$   | 94        |
| 5912.434259                    | 5912.403304                    | 30.955                                                |                                     | $0.1020 \times 10^{-3}$             |                | 7     | $F_1$ | 1          | 8    | $F_2$ | 198       |
| 5912.506780                    | 5912.480944                    | 25.836                                                |                                     | $0.2036 \times 10^{-3}$             |                | 5     | $F_2$ | 1          | 6    | $F_1$ | 156       |
| 5912.755270                    | 5912.759506                    | -4.236                                                | $0.5991 \times 10^{-3}$             | $0.5064 \times 10^{-3}$             | 18.305         | 7     | $F_2$ | 2          | 8    | $F_1$ | 194       |
| 5912.825950                    | 5912.825484                    | 0.466                                                 |                                     | $0.4119 \times 10^{-5}$             |                | 8     | $A_1$ | 1          | 9    | $A_2$ | 74        |
| 5913.597350                    | 5913.584077                    | 13.273                                                |                                     | $0.2020 \times 10^{-4}$             |                | 4     | $F_2$ | 1          | 3    | $F_1$ | 107       |
| 5913.734790                    | 5913.745121                    | -10.331                                               |                                     | $0.2722 \times 10^{-3}$             |                | 4     | $F_2$ | 1          | 5    | $F_1$ | 145       |
| 5913.841000                    | 5913.844052                    | -3.052                                                |                                     | $0.5306 \times 10^{-4}$             |                | 12    | $F_1$ | 2          | 11   | $F_2$ | 360       |
| 5913.867870                    | 5913.869749                    | -1.879                                                |                                     | $0.5384 \times 10^{-4}$             |                | 12    | $F_2$ | 1          | 11   | $F_1$ | 366       |
| 5913.948440                    | 5913.954312                    | -5.872                                                |                                     | $0.3893 \times 10^{-5}$             |                | 4     | $F_1$ | 1          | 3    | $F_2$ | 102       |
| 5914.043297                    | 5914.075569                    | -32.272                                               |                                     | $0.5837 \times 10^{-5}$             |                | 4     | $E$   | 1          | 3    | $E$   | 69        |
| 5914.330860                    | 5914.324382                    | 6.478                                                 |                                     | $0.2707 \times 10^{-3}$             |                | 6     | $A_1$ | 1          | 7    | $A_2$ | 63        |
| 5914.384560                    | 5914.364929                    | 19.631                                                |                                     | $0.1304 \times 10^{-3}$             |                | 4     | $F_2$ | 1          | 5    | $F_1$ | 146       |
| 5914.752330                    | 5914.740039                    | 12.291                                                |                                     | $0.8577 \times 10^{-2}$             |                | 8     | $A_1$ | 1          | 7    | $A_2$ | 80        |
| 5914.768360                    | 5914.749117                    | 19.243                                                | $0.5260 \times 10^{-2}$             | $0.5145 \times 10^{-2}$             | 2.232          | 8     | $F_1$ | 1          | 7    | $F_2$ | 226       |
| 5914.776810                    | 5914.754306                    | 22.504                                                | $0.3464 \times 10^{-2}$             | $0.3430 \times 10^{-2}$             | 0.990          | 8     | $E$   | 1          | 7    | $E$   | 151       |
| 5914.917850                    | 5914.928609                    | -10.759                                               | $0.5186 \times 10^{-2}$             | $0.5085 \times 10^{-2}$             | 1.995          | 8     | $F_2$ | 1          | 7    | $F_1$ | 231       |
| 5915.000650                    | 5914.983337                    | 17.313                                                | $0.5282 \times 10^{-2}$             | $0.5077 \times 10^{-2}$             | 4.030          | 8     | $F_1$ | 2          | 7    | $F_2$ | 227       |
| 5915.045150                    | 5915.043457                    | 1.693                                                 |                                     | $0.3372 \times 10^{-2}$             |                | 8     | $E$   | 2          | 7    | $E$   | 152       |
| 5915.061900                    | 5915.059873                    | 2.027                                                 | $0.4861 \times 10^{-2}$             | $0.5055 \times 10^{-2}$             | -3.842         | 8     | $F_2$ | 2          | 7    | $F_1$ | 232       |
| 5915.645220                    | 5915.611391                    | 33.829                                                | $0.7665 \times 10^{-4}$             | $0.6126 \times 10^{-4}$             | 25.114         | 5     | $F_2$ | 1          | 6    | $F_1$ | 158       |
| 5915.755110                    | 5915.763377                    | -8.267                                                |                                     | $0.1380 \times 10^{-3}$             |                | 6     | $F_2$ | 2          | 7    | $F_1$ | 183       |
| 5915.775000                    | 5915.785093                    | -10.093                                               |                                     | $0.2909 \times 10^{-4}$             |                | 6     | $F_2$ | 1          | 7    | $F_1$ | 183       |
| 5915.788690                    | 5915.791901                    | -3.211                                                | $0.1282 \times 10^{-3}$             | $0.1355 \times 10^{-3}$             | -5.401         | 6     | $F_1$ | 1          | 7    | $F_2$ | 179       |
| 5915.966110                    | 5916.028368                    | -62.258                                               |                                     | $0.1011 \times 10^{-4}$             |                | 8     | $E$   | 2          | 9    | $E$   | 143       |
| 5916.586840                    | 5916.575958                    | 10.882                                                | $0.3205 \times 10^{-3}$             | $0.2922 \times 10^{-3}$             | 9.696          | 7     | $F_1$ | 2          | 8    | $F_2$ | 200       |
| 5916.642634                    | 5916.631649                    | 10.985                                                |                                     | $0.1410 \times 10^{-4}$             |                | 7     | $F_1$ | 1          | 8    | $F_2$ | 200       |
| 5917.620685                    | 5917.627016                    | -6.331                                                |                                     | $0.1107 \times 10^{-2}$             |                | 9     | $F_1$ | 1          | 10   | $F_2$ | 240       |
| 5917.696054                    | 5917.705969                    | -9.915                                                | $0.1153 \times 10^{-2}$             | $0.1135 \times 10^{-2}$             | 1.548          | 9     | $F_2$ | 1          | 10   | $F_1$ | 233       |
| 5918.179610                    | 5918.190024                    | -10.414                                               | $0.1801 \times 10^{-4}$             | $0.1841 \times 10^{-4}$             | -2.193         | 11    | $F_1$ | 3          | 10   | $F_2$ | 331       |
| 5918.439000                    | 5918.444228                    | -5.228                                                |                                     | $0.2318 \times 10^{-4}$             |                | 5     | $F_1$ | 2          | 6    | $F_2$ | 166       |
| 5918.455600                    | 5918.458809                    | -3.209                                                | $0.5769 \times 10^{-3}$             | $0.5202 \times 10^{-3}$             | 10.902         | 5     | $F_1$ | 1          | 6    | $F_2$ | 166       |
| 5918.524680                    | 5918.534033                    | -9.353                                                | $0.2904 \times 10^{-4}$             | $0.2642 \times 10^{-4}$             | 9.935          | 11    | $F_1$ | 1          | 10   | $F_2$ | 331       |

Table II (continued).

| $\tilde{\nu}_e/\text{cm}^{-1}$ | $\tilde{\nu}_c/\text{cm}^{-1}$ | $\tilde{\nu}_e - \tilde{\nu}_c/10^{-3}\text{cm}^{-1}$ | $I_e/\text{cm}^{-2}\text{atm}^{-1}$ | $I_c/\text{cm}^{-2}\text{atm}^{-1}$ | $I_e - I_c/\%$ | $J''$ | $C''$ | $\alpha''$ | $J'$ | $C'$  | $\alpha'$ |
|--------------------------------|--------------------------------|-------------------------------------------------------|-------------------------------------|-------------------------------------|----------------|-------|-------|------------|------|-------|-----------|
| 5919.530650                    | 5919.583125                    | -52.475                                               | $0.6400 \times 10^{-4}$             | $0.7192 \times 10^{-4}$             | -11.014        | 5     | $E$   | 1          | 6    | $E$   | 110       |
| 5919.628797                    | 5919.650220                    | -21.423                                               | $0.8286 \times 10^{-3}$             | $0.9267 \times 10^{-3}$             | -10.586        | 8     | $F_2$ | 1          | 9    | $F_1$ | 222       |
| 5919.955550                    | 5919.970557                    | -15.007                                               | $0.3393 \times 10^{-3}$             | $0.3669 \times 10^{-3}$             | -7.529         | 8     | $F_1$ | 2          | 9    | $F_2$ | 216       |
| 5920.026155                    | 5920.041615                    | -15.460                                               |                                     | $0.1544 \times 10^{-3}$             |                | 8     | $F_1$ | 1          | 9    | $F_2$ | 216       |
| 5920.674488                    | 5920.657792                    | 16.696                                                | $0.7256 \times 10^{-3}$             | $0.5000 \times 10^{-3}$             | 45.133         | 6     | $A_1$ | 1          | 7    | $A_2$ | 65        |
| 5920.797742                    | 5920.796165                    | 1.577                                                 | $0.3080 \times 10^{-3}$             | $0.2876 \times 10^{-3}$             | 7.104          | 8     | $F_2$ | 1          | 9    | $F_1$ | 223       |
| 5920.887730                    | 5920.914618                    | -26.888                                               |                                     | $0.3948 \times 10^{-3}$             |                | 4     | $A_1$ | 1          | 5    | $A_2$ | 51        |
| 5921.205560                    | 5921.189513                    | 16.047                                                |                                     | $0.8128 \times 10^{-5}$             |                | 11    | $F_1$ | 2          | 10   | $F_2$ | 332       |
| 5921.358500                    | 5921.354785                    | 3.715                                                 |                                     | $0.1150 \times 10^{-3}$             |                | 5     | $F_2$ | 1          | 6    | $F_1$ | 161       |
| 5922.520620                    | 5922.506532                    | 14.088                                                |                                     | $0.2011 \times 10^{-4}$             |                | 3     | $A_2$ | 1          | 2    | $A_1$ | 28        |
| 5922.656880                    | 5922.656462                    | 0.418                                                 |                                     | $0.5985 \times 10^{-5}$             |                | 3     | $F_2$ | 1          | 2    | $F_1$ | 71        |
| 5923.235980                    | 5923.236101                    | -0.121                                                | $0.1287 \times 10^{-3}$             | $0.1277 \times 10^{-3}$             | 0.794          | 11    | $E$   | 2          | 10   | $E$   | 221       |
| 5923.258710                    | 5923.259952                    | -1.242                                                | $0.1112 \times 10^{-3}$             | $0.1135 \times 10^{-3}$             | -2.041         | 5     | $F_2$ | 1          | 6    | $F_1$ | 162       |
| 5923.316000                    | 5923.304281                    | 11.719                                                |                                     | $0.5427 \times 10^{-5}$             |                | 5     | $F_1$ | 2          | 6    | $F_2$ | 168       |
| 5923.330830                    | 5923.318861                    | 11.969                                                | $0.4553 \times 10^{-4}$             | $0.4761 \times 10^{-4}$             | -4.359         | 5     | $F_1$ | 1          | 6    | $F_2$ | 168       |
| 5923.946720                    | 5923.937680                    | 9.040                                                 | $0.1604 \times 10^{-3}$             | $0.1592 \times 10^{-3}$             | 0.730          | 11    | $F_1$ | 2          | 10   | $F_2$ | 334       |
| 5924.628170                    | 5924.685248                    | -57.078                                               |                                     | $0.1473 \times 10^{-3}$             |                | 6     | $A_2$ | 1          | 7    | $A_1$ | 60        |
| 5924.900672                    | 5924.889924                    | 10.748                                                |                                     | $0.5549 \times 10^{-4}$             |                | 11    | $E$   | 1          | 10   | $E$   | 222       |
| 5924.917786                    | 5924.906073                    | 11.713                                                |                                     | $0.8422 \times 10^{-4}$             |                | 11    | $F_2$ | 2          | 10   | $F_1$ | 326       |
| 5924.946023                    | 5924.933397                    | 12.626                                                |                                     | $0.1465 \times 10^{-3}$             |                | 11    | $A_2$ | 1          | 10   | $A_1$ | 114       |
| 5924.960873                    | 5924.952205                    | 8.668                                                 | $0.3063 \times 10^{-3}$             | $0.2923 \times 10^{-3}$             | 4.783          | 8     | $F_1$ | 2          | 9    | $F_2$ | 219       |
| 5925.022213                    | 5925.023264                    | -1.051                                                |                                     | $0.7579 \times 10^{-5}$             |                | 8     | $F_1$ | 1          | 9    | $F_2$ | 219       |
| 5925.177233                    | 5925.191394                    | -14.161                                               |                                     | $0.7039 \times 10^{-4}$             |                | 5     | $F_2$ | 1          | 6    | $F_1$ | 164       |
| 5925.863250                    | 5925.861274                    | 1.976                                                 | $0.1813 \times 10^{-3}$             | $0.1814 \times 10^{-3}$             | -0.082         | 8     | $F_2$ | 2          | 9    | $F_1$ | 225       |
| 5926.466350                    | 5926.460452                    | 5.898                                                 | $0.7427 \times 10^{-2}$             | $0.7022 \times 10^{-2}$             | 5.765          | 7     | $F_1$ | 1          | 6    | $F_2$ | 201       |
| 5926.484000                    | 5926.474524                    | 9.476                                                 | $0.7202 \times 10^{-2}$             | $0.7018 \times 10^{-2}$             | 2.628          | 7     | $F_2$ | 1          | 6    | $F_1$ | 193       |
| 5926.575350                    | 5926.587807                    | -12.457                                               | $0.1177 \times 10^{-1}$             | $0.1161 \times 10^{-1}$             | 1.382          | 7     | $A_2$ | 1          | 6    | $A_1$ | 70        |
| 5926.624650                    | 5926.629675                    | -5.025                                                | $0.6627 \times 10^{-2}$             | $0.6954 \times 10^{-2}$             | -4.705         | 7     | $F_2$ | 2          | 6    | $F_1$ | 194       |
| 5926.647230                    | 5926.652534                    | -5.304                                                |                                     | $0.4632 \times 10^{-2}$             |                | 7     | $E$   | 1          | 6    | $E$   | 133       |
| 5926.677750                    | 5926.688661                    | -10.911                                               | $0.6750 \times 10^{-2}$             | $0.6935 \times 10^{-2}$             | -2.665         | 7     | $F_1$ | 2          | 6    | $F_2$ | 202       |
| 5927.716940                    | 5927.706698                    | 10.242                                                |                                     | $0.2657 \times 10^{-4}$             |                | 6     | $F_2$ | 2          | 7    | $F_1$ | 190       |
| 5927.822450                    | 5927.813792                    | 8.658                                                 |                                     | $0.7585 \times 10^{-4}$             |                | 7     | $F_2$ | 2          | 8    | $F_1$ | 205       |
| 5927.860730                    | 5927.851811                    | 8.919                                                 |                                     | $0.6919 \times 10^{-4}$             |                | 7     | $F_2$ | 1          | 8    | $F_1$ | 205       |
| 5928.445170                    | 5928.449664                    | -4.494                                                |                                     | $0.8833 \times 10^{-4}$             |                | 9     | $F_1$ | 2          | 10   | $F_2$ | 243       |
| 5928.531290                    | 5928.537986                    | -6.696                                                |                                     | $0.9133 \times 10^{-4}$             |                | 9     | $F_1$ | 1          | 10   | $F_2$ | 243       |
| 5928.608960                    | 5928.608175                    | 0.785                                                 | $0.4254 \times 10^{-4}$             | $0.3588 \times 10^{-4}$             | 18.562         | 5     | $E$   | 1          | 6    | $E$   | 114       |
| 5928.723140                    | 5928.699639                    | 23.501                                                | $0.7192 \times 10^{-4}$             | $0.7175 \times 10^{-4}$             | 0.242          | 6     | $F_2$ | 2          | 7    | $F_1$ | 191       |
| 5928.743142                    | 5928.721355                    | 21.787                                                | $0.2921 \times 10^{-3}$             | $0.2309 \times 10^{-3}$             | 26.494         | 6     | $F_2$ | 1          | 7    | $F_1$ | 191       |
| 5928.859870                    | 5928.864253                    | -4.383                                                | $0.2299 \times 10^{-3}$             | $0.2079 \times 10^{-3}$             | 10.558         | 6     | $E$   | 1          | 7    | $E$   | 125       |
| 5929.121700                    | 5929.150991                    | -29.291                                               | $0.4883 \times 10^{-3}$             | $0.5245 \times 10^{-3}$             | -6.898         | 9     | $E$   | 1          | 10   | $E$   | 163       |
| 5929.384080                    | 5929.372604                    | 11.476                                                |                                     | $0.6458 \times 10^{-5}$             |                | 5     | $F_2$ | 1          | 6    | $F_1$ | 167       |
| 5929.535880                    | 5929.484562                    | 51.318                                                |                                     | $0.2069 \times 10^{-4}$             |                | 9     | $F_1$ | 3          | 10   | $F_2$ | 244       |
| 5929.584040                    | 5929.534282                    | 49.758                                                | $0.4318 \times 10^{-3}$             | $0.5787 \times 10^{-3}$             | -25.382        | 9     | $F_1$ | 2          | 10   | $F_2$ | 244       |
| 5929.665160                    | 5929.663327                    | 1.833                                                 |                                     | $0.7158 \times 10^{-4}$             |                | 9     | $F_1$ | 3          | 10   | $F_2$ | 245       |
| 5929.711960                    | 5929.713047                    | -1.087                                                |                                     | $0.4784 \times 10^{-4}$             |                | 9     | $F_1$ | 2          | 10   | $F_2$ | 245       |
| 5929.962251                    | 5929.945006                    | 17.245                                                | $0.1019 \times 10^{-2}$             | $0.1069 \times 10^{-2}$             | -4.699         | 9     | $A_1$ | 1          | 10   | $A_2$ | 79        |
| 5930.310260                    | 5930.315275                    | -5.015                                                | $0.2251 \times 10^{-4}$             | $0.2342 \times 10^{-4}$             | -3.897         | 10    | $E$   | 2          | 9    | $E$   | 196       |
| 5930.412730                    | 5930.415806                    | -3.076                                                | $0.3582 \times 10^{-4}$             | $0.3751 \times 10^{-4}$             | -4.508         | 10    | $F_2$ | 1          | 9    | $F_1$ | 301       |
| 5930.524890                    | 5930.501350                    | 23.540                                                |                                     | $0.9449 \times 10^{-4}$             |                | 7     | $F_1$ | 2          | 8    | $F_2$ | 211       |
| 5930.595090                    | 5930.632743                    | -37.653                                               |                                     | $0.1135 \times 10^{-3}$             |                | 7     | $A_2$ | 1          | 8    | $A_1$ | 74        |



Table II (continued).

| $\tilde{\nu}_e/\text{cm}^{-1}$ | $\tilde{\nu}_c/\text{cm}^{-1}$ | $\tilde{\nu}_e - \tilde{\nu}_c/10^{-3}\text{cm}^{-1}$ | $I_e/\text{cm}^{-2}\text{atm}^{-1}$ | $I_c/\text{cm}^{-2}\text{atm}^{-1}$ | $I_e - I_c/\%$ | $J''$ | $C''$ | $\alpha''$ | $J'$ | $C'$  | $\alpha'$ |
|--------------------------------|--------------------------------|-------------------------------------------------------|-------------------------------------|-------------------------------------|----------------|-------|-------|------------|------|-------|-----------|
| 5930.774890                    | 5930.781836                    | -6.946                                                | $0.6118 \times 10^{-4}$             | $0.5610 \times 10^{-4}$             | 9.048          | 10    | $F_1$ | 2          | 9    | $F_2$ | 293       |
| 5930.851470                    | 5930.857316                    | -5.846                                                |                                     | $0.4126 \times 10^{-4}$             |                | 10    | $F_1$ | 1          | 9    | $F_2$ | 293       |
| 5931.312120                    | 5931.328183                    | -16.063                                               | $0.1066 \times 10^{-3}$             | $0.4863 \times 10^{-4}$             | 119.186        | 7     | $F_2$ | 2          | 8    | $F_1$ | 208       |
| 5931.348800                    | 5931.366202                    | -17.402                                               |                                     | $0.2361 \times 10^{-5}$             |                | 7     | $F_2$ | 1          | 8    | $F_1$ | 208       |
| 5931.967180                    | 5931.955239                    | 11.941                                                |                                     | $0.3179 \times 10^{-3}$             |                | 9     | $F_1$ | 3          | 10   | $F_2$ | 246       |
| 5932.017010                    | 5932.004959                    | 12.051                                                |                                     | $0.8925 \times 10^{-4}$             |                | 9     | $F_1$ | 2          | 10   | $F_2$ | 246       |
| 5932.094270                    | 5932.084827                    | 9.443                                                 |                                     | $0.2510 \times 10^{-3}$             |                | 9     | $F_2$ | 2          | 10   | $F_1$ | 239       |
| 5932.746370                    | 5932.781975                    | -35.605                                               |                                     | $0.4518 \times 10^{-4}$             |                | 6     | $E$   | 1          | 7    | $E$   | 126       |
| 5933.716735                    | 5933.699625                    | 17.110                                                |                                     | $0.9949 \times 10^{-3}$             |                | 9     | $A_2$ | 1          | 10   | $A_1$ | 84        |
| 5933.943160                    | 5933.916879                    | 26.281                                                |                                     | $0.5347 \times 10^{-4}$             |                | 6     | $A_1$ | 1          | 7    | $A_2$ | 67        |
| 5934.447960                    | 5934.453779                    | -5.819                                                |                                     | $0.2816 \times 10^{-3}$             |                | 10    | $F_2$ | 3          | 9    | $F_1$ | 303       |
| 5934.626850                    | 5934.680823                    | -53.973                                               |                                     | $0.3556 \times 10^{-3}$             |                | 5     | $F_2$ | 1          | 6    | $F_1$ | 172       |
| 5934.775460                    | 5934.763158                    | 12.302                                                | $0.7293 \times 10^{-4}$             | $0.6990 \times 10^{-4}$             | 4.334          | 7     | $F_1$ | 1          | 8    | $F_2$ | 214       |
| 5934.817340                    | 5934.818225                    | -0.885                                                | $0.1590 \times 10^{-3}$             | $0.1477 \times 10^{-3}$             | 7.622          | 10    | $E$   | 2          | 9    | $E$   | 198       |
| 5934.934770                    | 5934.931132                    | 3.638                                                 |                                     | $0.2027 \times 10^{-3}$             |                | 10    | $F_1$ | 2          | 9    | $F_2$ | 295       |
| 5935.006775                    | 5935.006612                    | 0.163                                                 |                                     | $0.2338 \times 10^{-4}$             |                | 10    | $F_1$ | 1          | 9    | $F_2$ | 295       |
| 5935.117558                    | 5935.110334                    | 7.224                                                 | $0.3811 \times 10^{-3}$             | $0.3851 \times 10^{-3}$             | -1.027         | 10    | $A_1$ | 1          | 9    | $A_2$ | 102       |
| 5935.917200                    | 5935.902894                    | 14.306                                                | $0.1132 \times 10^{-3}$             | $0.1175 \times 10^{-3}$             | -3.632         | 10    | $F_1$ | 1          | 9    | $F_2$ | 296       |
| 5935.955850                    | 5935.939065                    | 16.785                                                | $0.1256 \times 10^{-3}$             | $0.1286 \times 10^{-3}$             | -2.348         | 10    | $F_2$ | 2          | 9    | $F_1$ | 304       |
| 5937.226020                    | 5937.229008                    | -2.988                                                | $0.2064 \times 10^{-3}$             | $0.2008 \times 10^{-3}$             | 2.778          | 10    | $F_2$ | 2          | 11   | $F_1$ | 267       |
| 5937.341890                    | 5937.346428                    | -4.538                                                |                                     | $0.4534 \times 10^{-4}$             |                | 10    | $F_2$ | 1          | 11   | $F_1$ | 267       |
| 5937.642540                    | 5937.647143                    | -4.603                                                | $0.6258 \times 10^{-4}$             | $0.3999 \times 10^{-4}$             | 56.495         | 8     | $E$   | 2          | 9    | $E$   | 155       |
| 5937.727290                    | 5937.732785                    | -5.495                                                |                                     | $0.2046 \times 10^{-4}$             |                | 8     | $E$   | 1          | 9    | $E$   | 155       |
| 5938.057270                    | 5938.056981                    | 0.289                                                 | $0.6214 \times 10^{-2}$             | $0.5914 \times 10^{-2}$             | 5.076          | 6     | $E$   | 1          | 5    | $E$   | 111       |
| 5938.065550                    | 5938.065478                    | 0.072                                                 | $0.8734 \times 10^{-2}$             | $0.8866 \times 10^{-2}$             | -1.489         | 6     | $F_2$ | 1          | 5    | $F_1$ | 172       |
| 5938.094640                    | 5938.091874                    | 2.766                                                 | $0.1567 \times 10^{-1}$             | $0.1476 \times 10^{-1}$             | 6.176          | 6     | $A_2$ | 1          | 5    | $A_1$ | 53        |
| 5938.168070                    | 5938.179193                    | -11.123                                               | $0.9480 \times 10^{-2}$             | $0.8807 \times 10^{-2}$             | 7.643          | 6     | $F_2$ | 2          | 5    | $F_1$ | 173       |
| 5938.190100                    | 5938.203644                    | -13.544                                               | $0.8878 \times 10^{-2}$             | $0.8798 \times 10^{-2}$             | 0.906          | 6     | $F_1$ | 1          | 5    | $F_2$ | 164       |
| 5938.208200                    | 5938.225213                    | -17.013                                               | $0.1450 \times 10^{-1}$             | $0.1465 \times 10^{-1}$             | -1.031         | 6     | $A_1$ | 1          | 5    | $A_2$ | 58        |
| 5941.211220                    | 5941.209536                    | 1.684                                                 | $0.2708 \times 10^{-4}$             | $0.2439 \times 10^{-4}$             | 11.014         | 9     | $A_2$ | 1          | 8    | $A_1$ | 93        |
| 5941.670620                    | 5941.679467                    | -8.847                                                | $0.2283 \times 10^{-3}$             | $0.2573 \times 10^{-3}$             | -11.264        | 10    | $F_1$ | 2          | 11   | $F_2$ | 264       |
| 5941.745820                    | 5941.754947                    | -9.127                                                | $0.4367 \times 10^{-4}$             | $0.3871 \times 10^{-4}$             | 12.814         | 10    | $F_1$ | 1          | 11   | $F_2$ | 264       |
| 5942.102600                    | 5942.101586                    | 1.014                                                 | $0.2522 \times 10^{-4}$             | $0.2271 \times 10^{-4}$             | 11.036         | 9     | $F_2$ | 2          | 8    | $F_1$ | 262       |
| 5942.246200                    | 5942.246301                    | -0.101                                                | $0.5010 \times 10^{-4}$             | $0.5678 \times 10^{-4}$             | -11.772        | 9     | $F_2$ | 1          | 8    | $F_1$ | 262       |
| 5942.432060                    | 5942.433210                    | -1.150                                                | $0.4019 \times 10^{-4}$             | $0.3590 \times 10^{-4}$             | 11.957         | 9     | $F_1$ | 1          | 8    | $F_2$ | 267       |
| 5942.494380                    | 5942.505807                    | -11.427                                               | $0.7772 \times 10^{-4}$             | $0.5226 \times 10^{-4}$             | 48.718         | 9     | $F_2$ | 2          | 10   | $F_1$ | 249       |
| 5942.593780                    | 5942.598703                    | -4.923                                                | $0.2207 \times 10^{-3}$             | $0.2161 \times 10^{-3}$             | 2.107          | 9     | $A_1$ | 1          | 8    | $A_2$ | 85        |
| 5943.871020                    | 5943.868341                    | 2.679                                                 |                                     | $0.1821 \times 10^{-4}$             |                | 9     | $F_1$ | 3          | 8    | $F_2$ | 268       |
| 5943.919980                    | 5943.918061                    | 1.919                                                 | $0.2432 \times 10^{-4}$             | $0.2462 \times 10^{-4}$             | -1.214         | 9     | $F_1$ | 2          | 8    | $F_2$ | 268       |
| 5944.007380                    | 5944.006383                    | 0.997                                                 | $0.1544 \times 10^{-4}$             | $0.1547 \times 10^{-4}$             | -0.215         | 9     | $F_1$ | 1          | 8    | $F_2$ | 268       |
| 5944.172800                    | 5944.172407                    | 0.393                                                 | $0.3131 \times 10^{-4}$             | $0.2782 \times 10^{-4}$             | 12.536         | 9     | $E$   | 1          | 8    | $E$   | 179       |
| 5945.241980                    | 5945.279521                    | -37.541                                               |                                     | $0.1072 \times 10^{-4}$             |                | 7     | $F_1$ | 2          | 8    | $F_2$ | 220       |
| 5945.687720                    | 5945.698441                    | -10.721                                               | $0.5813 \times 10^{-3}$             | $0.6123 \times 10^{-3}$             | -5.058         | 9     | $A_2$ | 1          | 8    | $A_1$ | 94        |
| 5945.924820                    | 5945.931067                    | -6.247                                                | $0.2987 \times 10^{-3}$             | $0.3103 \times 10^{-3}$             | -3.725         | 9     | $F_2$ | 2          | 8    | $F_1$ | 264       |
| 5946.090961                    | 5946.095239                    | -4.278                                                | $0.2681 \times 10^{-3}$             | $0.2733 \times 10^{-3}$             | -1.885         | 9     | $F_1$ | 3          | 8    | $F_2$ | 269       |
| 5946.140830                    | 5946.144958                    | -4.128                                                | $0.3288 \times 10^{-4}$             | $0.2725 \times 10^{-4}$             | 20.664         | 9     | $F_1$ | 2          | 8    | $F_2$ | 269       |
| 5946.161690                    | 5946.158321                    | 3.369                                                 | $0.1301 \times 10^{-3}$             | $0.1209 \times 10^{-3}$             | 7.594          | 8     | $A_1$ | 1          | 9    | $A_2$ | 81        |
| 5946.847649                    | 5946.838573                    | 9.076                                                 |                                     | $0.2737 \times 10^{-3}$             |                | 9     | $A_1$ | 1          | 8    | $A_2$ | 86        |
| 5946.918176                    | 5946.905862                    | 12.314                                                | $0.1475 \times 10^{-3}$             | $0.1655 \times 10^{-3}$             | -10.856        | 9     | $F_1$ | 2          | 8    | $F_2$ | 270       |
| 5946.943063                    | 5946.929575                    | 13.488                                                | $0.9825 \times 10^{-4}$             | $0.1190 \times 10^{-3}$             | -17.431        | 9     | $E$   | 1          | 8    | $E$   | 180       |

Table II (continued).

| $\tilde{\nu}_e/\text{cm}^{-1}$ | $\tilde{\nu}_c/\text{cm}^{-1}$ | $\tilde{\nu}_e - \tilde{\nu}_c/10^{-3}\text{cm}^{-1}$ | $I_e/\text{cm}^{-2}\text{atm}^{-1}$ | $I_c/\text{cm}^{-2}\text{atm}^{-1}$ | $I_e - I_c/\%$ | $J''$ | $C''$ | $\alpha''$ | $J'$ | $C'$  | $\alpha'$ |
|--------------------------------|--------------------------------|-------------------------------------------------------|-------------------------------------|-------------------------------------|----------------|-------|-------|------------|------|-------|-----------|
| 5948.141780                    | 5948.129559                    | 12.221                                                |                                     | $0.8196 \times 10^{-5}$             |                | 11    | $F_2$ | 2          | 12   | $F_1$ | 284       |
| 5948.609470                    | 5948.544005                    | 65.465                                                |                                     | $0.7821 \times 10^{-3}$             |                | 6     | $A_2$ | 1          | 7    | $A_1$ | 65        |
| 5949.527240                    | 5949.528842                    | -1.602                                                | $0.1050 \times 10^{-1}$             | $0.1028 \times 10^{-1}$             | 2.173          | 5     | $F_1$ | 1          | 4    | $F_2$ | 139       |
| 5949.552530                    | 5949.556176                    | -3.646                                                | $0.1062 \times 10^{-1}$             | $0.1026 \times 10^{-1}$             | 3.490          | 5     | $F_2$ | 1          | 4    | $F_1$ | 134       |
| 5949.608140                    | 5949.621516                    | -13.376                                               | $0.6869 \times 10^{-2}$             | $0.6813 \times 10^{-2}$             | 0.824          | 5     | $E$   | 1          | 4    | $E$   | 93        |
| 5949.619160                    | 5949.634757                    | -15.597                                               | $0.1019 \times 10^{-1}$             | $0.1021 \times 10^{-1}$             | -0.244         | 5     | $F_1$ | 2          | 4    | $F_2$ | 140       |
| 5950.665610                    | 5950.737599                    | -71.989                                               | $0.3166 \times 10^{-4}$             | $0.2932 \times 10^{-4}$             | 7.970          | 12    | $A_1$ | 2          | 11   | $A_2$ | 129       |
| 5951.098350                    | 5951.072258                    | 26.092                                                |                                     | $0.4135 \times 10^{-4}$             |                | 12    | $A_2$ | 1          | 11   | $A_1$ | 121       |
| 5953.048940                    | 5953.058621                    | -9.681                                                |                                     | $0.8056 \times 10^{-6}$             |                | 1     | $F_1$ | 1          | 1    | $F_2$ | 42        |
| 5953.982188                    | 5953.978159                    | 4.029                                                 |                                     | $0.2255 \times 10^{-4}$             |                | 8     | $E$   | 2          | 7    | $E$   | 155       |
| 5954.068200                    | 5954.063801                    | 4.399                                                 | $0.4859 \times 10^{-4}$             | $0.4744 \times 10^{-4}$             | 2.416          | 8     | $E$   | 1          | 7    | $E$   | 155       |
| 5954.091376                    | 5954.090908                    | 0.468                                                 |                                     | $0.3655 \times 10^{-5}$             |                | 2     | $F_2$ | 1          | 2    | $F_1$ | 71        |
| 5954.096620                    | 5954.095071                    | 1.549                                                 | $0.9563 \times 10^{-4}$             | $0.7323 \times 10^{-4}$             | 30.581         | 8     | $F_1$ | 2          | 7    | $F_2$ | 232       |
| 5954.168370                    | 5954.166129                    | 2.241                                                 | $0.4492 \times 10^{-4}$             | $0.4680 \times 10^{-4}$             | -4.016         | 8     | $F_1$ | 1          | 7    | $F_2$ | 232       |
| 5954.230499                    | 5954.248342                    | -17.843                                               |                                     | $0.4880 \times 10^{-5}$             |                | 2     | $E$   | 1          | 2    | $E$   | 51        |
| 5955.234190                    | 5955.240430                    | -6.240                                                |                                     | $0.9403 \times 10^{-4}$             |                | 8     | $A_1$ | 1          | 7    | $A_2$ | 82        |
| 5955.458900                    | 5955.468815                    | -9.915                                                | $0.4673 \times 10^{-4}$             | $0.5304 \times 10^{-4}$             | -11.890        | 8     | $F_1$ | 2          | 7    | $F_2$ | 233       |
| 5955.499161                    | 5955.487236                    | 11.925                                                |                                     | $0.7452 \times 10^{-5}$             |                | 3     | $F_2$ | 1          | 3    | $F_1$ | 107       |
| 5955.701850                    | 5955.709796                    | -7.946                                                |                                     | $0.2830 \times 10^{-4}$             |                | 8     | $F_2$ | 2          | 7    | $F_1$ | 238       |
| 5955.741420                    | 5955.750191                    | -8.771                                                | $0.2808 \times 10^{-4}$             | $0.2861 \times 10^{-4}$             | -1.863         | 8     | $F_2$ | 1          | 7    | $F_1$ | 238       |
| 5955.848420                    | 5955.853226                    | -4.806                                                | $0.2059 \times 10^{-4}$             | $0.1877 \times 10^{-4}$             | 9.711          | 3     | $F_1$ | 1          | 3    | $F_2$ | 102       |
| 5956.127490                    | 5956.180744                    | -53.254                                               | $0.3819 \times 10^{-5}$             | $0.3776 \times 10^{-5}$             | 1.148          | 3     | $F_2$ | 1          | 3    | $F_1$ | 108       |
| 5957.080130                    | 5957.090963                    | -10.833                                               | $0.3909 \times 10^{-3}$             | $0.3735 \times 10^{-3}$             | 4.649          | 8     | $F_2$ | 2          | 7    | $F_1$ | 239       |
| 5957.174700                    | 5957.182759                    | -8.059                                                | $0.2515 \times 10^{-3}$             | $0.2440 \times 10^{-3}$             | 3.072          | 8     | $E$   | 2          | 7    | $E$   | 156       |
| 5957.484724                    | 5957.474146                    | 10.578                                                |                                     | $0.1567 \times 10^{-4}$             |                | 4     | $E$   | 1          | 4    | $E$   | 90        |
| 5957.544677                    | 5957.537116                    | 7.561                                                 |                                     | $0.1831 \times 10^{-4}$             |                | 4     | $F_1$ | 1          | 4    | $F_2$ | 136       |
| 5957.814950                    | 5957.811284                    | 3.666                                                 | $0.1977 \times 10^{-3}$             | $0.2104 \times 10^{-3}$             | -6.036         | 8     | $F_1$ | 2          | 7    | $F_2$ | 234       |
| 5957.898620                    | 5957.892102                    | 6.518                                                 | $0.2160 \times 10^{-3}$             | $0.2263 \times 10^{-3}$             | -4.533         | 8     | $F_2$ | 1          | 7    | $F_1$ | 240       |
| 5958.146040                    | 5958.136840                    | 9.200                                                 | $0.8054 \times 10^{-4}$             | $0.7390 \times 10^{-4}$             | 8.984          | 4     | $A_1$ | 1          | 4    | $A_2$ | 42        |
| 5958.170000                    | 5958.168763                    | 1.237                                                 |                                     | $0.7148 \times 10^{-5}$             |                | 11    | $F_1$ | 3          | 10   | $F_2$ | 346       |
| 5958.299029                    | 5958.319066                    | -20.037                                               |                                     | $0.1668 \times 10^{-4}$             |                | 4     | $F_1$ | 1          | 4    | $F_2$ | 137       |
| 5958.450530                    | 5958.453491                    | -2.961                                                | $0.1986 \times 10^{-4}$             | $0.1836 \times 10^{-4}$             | 8.146          | 11    | $F_2$ | 3          | 10   | $F_1$ | 339       |
| 5958.886470                    | 5958.909803                    | -23.333                                               |                                     | $0.2214 \times 10^{-4}$             |                | 7     | $F_2$ | 2          | 8    | $F_1$ | 221       |
| 5958.924440                    | 5958.947822                    | -23.382                                               |                                     | $0.1720 \times 10^{-4}$             |                | 7     | $F_2$ | 1          | 8    | $F_1$ | 221       |
| 5959.804000                    | 5959.827953                    | -23.953                                               |                                     | $0.3482 \times 10^{-4}$             |                | 11    | $F_1$ | 2          | 10   | $F_2$ | 348       |
| 5959.849110                    | 5959.833945                    | 15.165                                                | $0.4602 \times 10^{-4}$             | $0.4574 \times 10^{-4}$             | 0.618          | 5     | $F_2$ | 1          | 5    | $F_1$ | 167       |
| 5960.002000                    | 5959.995694                    | 6.306                                                 |                                     | $0.2851 \times 10^{-5}$             |                | 5     | $F_1$ | 2          | 5    | $F_2$ | 160       |
| 5960.015630                    | 5960.010274                    | 5.356                                                 | $0.3320 \times 10^{-4}$             | $0.2988 \times 10^{-4}$             | 11.107         | 5     | $F_1$ | 1          | 5    | $F_2$ | 160       |
| 5960.866970                    | 5960.867016                    | -0.046                                                | $0.1833 \times 10^{-1}$             | $0.1790 \times 10^{-1}$             | 2.385          | 4     | $A_1$ | 1          | 3    | $A_2$ | 40        |
| 5960.884600                    | 5960.887609                    | -3.009                                                |                                     | $0.1073 \times 10^{-1}$             |                | 4     | $F_1$ | 1          | 3    | $F_2$ | 105       |
| 5960.896650                    | 5960.902581                    | -5.931                                                |                                     | $0.7146 \times 10^{-2}$             |                | 4     | $E$   | 1          | 3    | $E$   | 70        |
| 5960.933308                    | 5960.944903                    | -11.595                                               | $0.1033 \times 10^{-1}$             | $0.1069 \times 10^{-1}$             | -3.361         | 4     | $F_2$ | 1          | 3    | $F_1$ | 110       |
| 5961.279030                    | 5961.210368                    | 68.662                                                |                                     | $0.5931 \times 10^{-5}$             |                | 5     | $F_2$ | 1          | 5    | $F_1$ | 169       |
| 5961.207297                    | 5961.269042                    | -61.745                                               | $0.3190 \times 10^{-5}$             | $0.2873 \times 10^{-5}$             | 11.025         | 5     | $F_1$ | 2          | 5    | $F_2$ | 162       |
| 5961.718900                    | 5961.744085                    | -25.185                                               |                                     | $0.4089 \times 10^{-3}$             |                | 7     | $A_2$ | 1          | 8    | $A_1$ | 80        |
| 5962.330320                    | 5962.341057                    | -10.737                                               | $0.1169 \times 10^{-3}$             | $0.1229 \times 10^{-3}$             | -4.880         | 6     | $A_2$ | 1          | 6    | $A_1$ | 68        |
| 5962.409464                    | 5962.409679                    | -0.215                                                |                                     | $0.3798 \times 10^{-5}$             |                | 4     | $F_2$ | 1          | 3    | $F_1$ | 111       |
| 5962.539000                    | 5962.544869                    | -5.869                                                |                                     | $0.9094 \times 10^{-5}$             |                | 6     | $F_2$ | 2          | 6    | $F_1$ | 189       |
| 5962.561760                    | 5962.566585                    | -4.825                                                | $0.5277 \times 10^{-4}$             | $0.5281 \times 10^{-4}$             | -0.077         | 6     | $F_2$ | 1          | 6    | $F_1$ | 189       |
| 5964.931100                    | 5964.917307                    | 13.793                                                | $0.1843 \times 10^{-4}$             | $0.1774 \times 10^{-4}$             | 3.902          | 6     | $F_2$ | 2          | 6    | $F_1$ | 191       |

Table II (continued).

| $\tilde{\nu}_e/\text{cm}^{-1}$ | $\tilde{\nu}_c/\text{cm}^{-1}$ | $\tilde{\nu}_e - \tilde{\nu}_c/10^{-3}\text{cm}^{-1}$ | $I_e/\text{cm}^{-2}\text{atm}^{-1}$ | $I_c/\text{cm}^{-2}\text{atm}^{-1}$ | $I_e - I_c/\%$ | $J''$ | $C''$ | $\alpha''$ | $J'$ | $C'$  | $\alpha'$ |
|--------------------------------|--------------------------------|-------------------------------------------------------|-------------------------------------|-------------------------------------|----------------|-------|-------|------------|------|-------|-----------|
| 5964.952750                    | 5964.939024                    | 13.726                                                | $0.3474 \times 10^{-4}$             | $0.2585 \times 10^{-4}$             | 34.368         | 6     | $F_2$ | 1          | 6    | $F_1$ | 191       |
| 5965.456560                    | 5965.455036                    | 1.524                                                 | $0.4347 \times 10^{-4}$             | $0.3982 \times 10^{-4}$             | 9.171          | 10    | $F_1$ | 1          | 9    | $F_2$ | 306       |
| 5965.741181                    | 5965.728864                    | 12.317                                                | $0.5326 \times 10^{-4}$             | $0.7540 \times 10^{-5}$             | 606.365        | 10    | $A_1$ | 1          | 9    | $A_2$ | 106       |
| 5965.768091                    | 5965.760146                    | 7.945                                                 | $0.5250 \times 10^{-4}$             | $0.5402 \times 10^{-4}$             | -2.816         | 7     | $F_2$ | 2          | 6    | $F_1$ | 198       |
| 5965.807141                    | 5965.798164                    | 8.977                                                 | $0.7280 \times 10^{-4}$             | $0.7475 \times 10^{-4}$             | -2.610         | 7     | $F_2$ | 1          | 6    | $F_1$ | 198       |
| 5966.050000                    | 5966.041375                    | 8.625                                                 |                                     | $0.9945 \times 10^{-5}$             |                | 10    | $F_1$ | 2          | 9    | $F_2$ | 307       |
| 5966.739132                    | 5966.755807                    | -16.675                                               |                                     | $0.5996 \times 10^{-4}$             |                | 7     | $F_1$ | 1          | 6    | $F_2$ | 207       |
| 5966.990115                    | 5967.003572                    | -13.457                                               |                                     | $0.6740 \times 10^{-4}$             |                | 7     | $E$   | 1          | 6    | $E$   | 137       |
| 5967.276220                    | 5967.289937                    | -13.717                                               | $0.2958 \times 10^{-4}$             | $0.3428 \times 10^{-4}$             | -13.705        | 7     | $F_2$ | 2          | 6    | $F_1$ | 199       |
| 5967.311550                    | 5967.327956                    | -16.406                                               |                                     | $0.6215 \times 10^{-5}$             |                | 7     | $F_2$ | 1          | 6    | $F_1$ | 199       |
| 5967.793470                    | 5967.792659                    | 0.811                                                 |                                     | $0.4579 \times 10^{-4}$             |                | 10    | $F_1$ | 2          | 9    | $F_2$ | 309       |
| 5968.231120                    | 5968.241827                    | -10.707                                               | $0.3926 \times 10^{-3}$             | $0.4135 \times 10^{-3}$             | -5.063         | 7     | $F_1$ | 2          | 6    | $F_2$ | 208       |
| 5968.581967                    | 5968.625597                    | -43.630                                               | $0.4377 \times 10^{-4}$             | $0.3646 \times 10^{-4}$             | 20.047         | 7     | $F_1$ | 1          | 7    | $F_2$ | 223       |
| 5968.718270                    | 5968.720559                    | -2.289                                                | $0.1745 \times 10^{-3}$             | $0.1653 \times 10^{-3}$             | 5.540          | 7     | $E$   | 1          | 6    | $E$   | 138       |
| 5968.774330                    | 5968.775654                    | -1.324                                                | $0.2218 \times 10^{-3}$             | $0.2492 \times 10^{-3}$             | -11.010        | 7     | $F_2$ | 2          | 6    | $F_1$ | 200       |
| 5968.811370                    | 5968.840703                    | -29.333                                               |                                     | $0.4154 \times 10^{-5}$             |                | 9     | $E$   | 1          | 8    | $E$   | 183       |
| 5968.856670                    | 5968.857250                    | -0.580                                                | $0.4037 \times 10^{-3}$             | $0.4455 \times 10^{-3}$             | -9.378         | 7     | $A_2$ | 1          | 6    | $A_1$ | 72        |
| 5968.937380                    | 5968.933795                    | 3.585                                                 | $0.3567 \times 10^{-4}$             | $0.2216 \times 10^{-4}$             | 60.999         | 7     | $F_2$ | 2          | 7    | $F_1$ | 228       |
| 5968.976850                    | 5968.971814                    | 5.036                                                 | $0.4670 \times 10^{-4}$             | $0.2601 \times 10^{-4}$             | 79.551         | 7     | $F_2$ | 1          | 7    | $F_1$ | 228       |
| 5969.147030                    | 5969.133190                    | 13.840                                                | $0.5179 \times 10^{-4}$             | $0.4813 \times 10^{-4}$             | 7.607          | 10    | $F_2$ | 3          | 9    | $F_1$ | 318       |
| 5969.621370                    | 5969.562219                    | 59.151                                                |                                     | $0.8904 \times 10^{-4}$             |                | 7     | $A_2$ | 1          | 7    | $A_1$ | 71        |
| 5970.878000                    | 5970.890691                    | -12.691                                               |                                     | $0.1260 \times 10^{-5}$             |                | 9     | $F_1$ | 3          | 8    | $F_2$ | 276       |
| 5972.095210                    | 5972.095431                    | -0.221                                                | $0.9905 \times 10^{-2}$             | $0.9769 \times 10^{-2}$             | 1.394          | 3     | $F_1$ | 1          | 2    | $F_2$ | 80        |
| 5972.111780                    | 5972.115477                    | -3.697                                                | $0.9494 \times 10^{-2}$             | $0.9755 \times 10^{-2}$             | -2.672         | 3     | $F_2$ | 1          | 2    | $F_1$ | 72        |
| 5972.133740                    | 5972.140560                    | -6.820                                                | $0.1630 \times 10^{-1}$             | $0.1624 \times 10^{-1}$             | 0.400          | 3     | $A_2$ | 1          | 2    | $A_1$ | 29        |
| 5973.158770                    | 5973.137955                    | 20.815                                                |                                     | $0.1105 \times 10^{-3}$             |                | 8     | $E$   | 2          | 9    | $E$   | 167       |
| 5973.244140                    | 5973.223598                    | 20.542                                                | $0.6625 \times 10^{-4}$             | $0.2410 \times 10^{-4}$             | 174.848        | 8     | $E$   | 1          | 9    | $E$   | 167       |
| 5975.717920                    | 5975.713007                    | 4.913                                                 |                                     | $0.3548 \times 10^{-5}$             |                | 9     | $F_1$ | 3          | 8    | $F_2$ | 282       |
| 5975.854000                    | 5975.851048                    | 2.952                                                 |                                     | $0.2252 \times 10^{-6}$             |                | 9     | $F_1$ | 1          | 8    | $F_2$ | 282       |
| 5976.338590                    | 5976.345147                    | -6.557                                                |                                     | $0.1291 \times 10^{-6}$             |                | 9     | $F_2$ | 2          | 8    | $F_1$ | 275       |
| 5976.473230                    | 5976.455427                    | 17.803                                                | $0.4254 \times 10^{-4}$             | $0.2439 \times 10^{-4}$             | 74.432         | 9     | $A_1$ | 1          | 8    | $A_2$ | 91        |
| 5976.605290                    | 5976.591311                    | 13.979                                                | $0.1021 \times 10^{-3}$             | $0.7208 \times 10^{-4}$             | 41.648         | 9     | $F_1$ | 3          | 8    | $F_2$ | 283       |
| 5976.895710                    | 5976.879053                    | 16.657                                                |                                     | $0.7219 \times 10^{-4}$             |                | 9     | $F_2$ | 2          | 8    | $F_1$ | 276       |
| 5976.954096                    | 5976.943619                    | 10.477                                                |                                     | $0.1278 \times 10^{-4}$             |                | 6     | $F_1$ | 1          | 5    | $F_2$ | 168       |
| 5977.067229                    | 5977.058292                    | 8.937                                                 |                                     | $0.2170 \times 10^{-4}$             |                | 6     | $F_2$ | 2          | 5    | $F_1$ | 176       |
| 5977.088752                    | 5977.080008                    | 8.744                                                 |                                     | $0.1406 \times 10^{-4}$             |                | 6     | $F_2$ | 1          | 5    | $F_1$ | 176       |
| 5977.402360                    | 5977.388919                    | 13.441                                                | $0.2206 \times 10^{-3}$             | $0.2175 \times 10^{-3}$             | 1.439          | 6     | $A_2$ | 1          | 5    | $A_1$ | 54        |
| 5978.019150                    | 5978.018577                    | 0.573                                                 | $0.2391 \times 10^{-3}$             | $0.2655 \times 10^{-4}$             | 800.545        | 8     | $A_1$ | 1          | 7    | $A_2$ | 84        |
| 5978.048425                    | 5978.060698                    | -12.273                                               |                                     | $0.3001 \times 10^{-4}$             |                | 6     | $F_2$ | 2          | 5    | $F_1$ | 177       |
| 5978.063240                    | 5978.062041                    | 1.199                                                 | $0.1418 \times 10^{-3}$             | $0.1337 \times 10^{-4}$             | 960.378        | 8     | $F_1$ | 1          | 7    | $F_2$ | 237       |
| 5978.068500                    | 5978.082415                    | -13.915                                               |                                     | $0.5030 \times 10^{-4}$             |                | 6     | $F_2$ | 1          | 5    | $F_1$ | 177       |
| 5978.143640                    | 5978.137554                    | 6.086                                                 | $0.9257 \times 10^{-4}$             | $0.1427 \times 10^{-4}$             | 548.611        | 8     | $E$   | 1          | 7    | $E$   | 159       |
| 5978.350210                    | 5978.364540                    | -14.330                                               | $0.4866 \times 10^{-4}$             | $0.3881 \times 10^{-4}$             | 25.371         | 6     | $E$   | 1          | 5    | $E$   | 114       |
| 5978.500000                    | 5978.489515                    | 10.485                                                |                                     | $0.2380 \times 10^{-4}$             |                | 10    | $A_1$ | 1          | 9    | $A_2$ | 109       |
| 5978.608000                    | 5978.620371                    | -12.371                                               |                                     | $0.7945 \times 10^{-4}$             |                | 6     | $F_1$ | 1          | 5    | $F_2$ | 169       |
| 5979.300740                    | 5979.309634                    | -8.894                                                | $0.6170 \times 10^{-3}$             | $0.6776 \times 10^{-3}$             | -8.941         | 6     | $A_1$ | 1          | 5    | $A_2$ | 60        |
| 5979.599000                    | 5979.605646                    | -6.646                                                | $0.2461 \times 10^{-3}$             | $0.2710 \times 10^{-3}$             | -9.178         | 6     | $F_1$ | 1          | 5    | $F_2$ | 170       |
| 5979.708030                    | 5979.713466                    | -5.436                                                | $0.2307 \times 10^{-3}$             | $0.2620 \times 10^{-3}$             | -11.944        | 6     | $F_2$ | 2          | 5    | $F_1$ | 178       |
| 5979.730000                    | 5979.735182                    | -5.182                                                |                                     | $0.1164 \times 10^{-4}$             |                | 6     | $F_2$ | 1          | 5    | $F_1$ | 178       |
| 5981.821120                    | 5981.823916                    | -2.796                                                |                                     | $0.1648 \times 10^{-3}$             |                | 10    | $A_2$ | 1          | 10   | $A_1$ | 108       |

Table II (continued).

| $\tilde{\nu}_e/\text{cm}^{-1}$ | $\tilde{\nu}_c/\text{cm}^{-1}$ | $\tilde{\nu}_e - \tilde{\nu}_c/10^{-3}\text{cm}^{-1}$ | $I_e/\text{cm}^{-2}\text{atm}^{-1}$ | $I_c/\text{cm}^{-2}\text{atm}^{-1}$ | $I_e - I_c/\%$ | $J''$ | $C''$ | $\alpha''$ | $J'$ | $C'$  | $\alpha'$ |
|--------------------------------|--------------------------------|-------------------------------------------------------|-------------------------------------|-------------------------------------|----------------|-------|-------|------------|------|-------|-----------|
| 5983.183530                    | 5983.181148                    | 2.382                                                 | $0.4685 \times 10^{-2}$             | $0.4724 \times 10^{-2}$             | -0.828         | 2     | $E$   | 1          | 1    | $E$   | 30        |
| 5983.193690                    | 5983.192855                    | 0.835                                                 | $0.6972 \times 10^{-2}$             | $0.7080 \times 10^{-2}$             | -1.528         | 2     | $F_2$ | 1          | 1    | $F_1$ | 51        |
| 5985.422840                    | 5985.398853                    | 23.987                                                | $0.6564 \times 10^{-4}$             | $0.3678 \times 10^{-6}$             | 17748.007      | 7     | $A_2$ | 1          | 6    | $A_1$ | 73        |
| 5985.792020                    | 5985.779174                    | 12.846                                                |                                     | $0.1302 \times 10^{-4}$             |                | 9     | $F_1$ | 3          | 8    | $F_2$ | 287       |
| 5985.863000                    | 5985.858896                    | 4.104                                                 |                                     | $0.1576 \times 10^{-4}$             |                | 8     | $F_2$ | 2          | 7    | $F_1$ | 252       |
| 5985.904000                    | 5985.899291                    | 4.709                                                 | $0.7339 \times 10^{-5}$             | $0.1691 \times 10^{-5}$             | 334.095        | 8     | $F_2$ | 1          | 7    | $F_1$ | 252       |
| 5986.021920                    | 5986.015376                    | 6.544                                                 | $0.2581 \times 10^{-3}$             | $0.1442 \times 10^{-3}$             | 78.983         | 10    | $A_1$ | 1          | 10   | $A_2$ | 103       |
| 5987.015645                    | 5987.009234                    | 6.411                                                 |                                     | $0.1110 \times 10^{-4}$             |                | 7     | $F_1$ | 1          | 6    | $F_2$ | 212       |
| 5987.010000                    | 5987.012377                    | -2.377                                                |                                     | $0.2241 \times 10^{-5}$             |                | 7     | $E$   | 1          | 6    | $E$   | 140       |
| 5987.067870                    | 5987.057174                    | 10.696                                                |                                     | $0.2450 \times 10^{-5}$             |                | 7     | $F_2$ | 2          | 6    | $F_1$ | 204       |
| 5987.106570                    | 5987.095192                    | 11.378                                                | $0.1419 \times 10^{-3}$             | $0.9748 \times 10^{-5}$             | 1355.668       | 7     | $F_2$ | 1          | 6    | $F_1$ | 204       |
| 5987.289450                    | 5987.286694                    | 2.756                                                 |                                     | $0.7283 \times 10^{-5}$             |                | 8     | $E$   | 2          | 7    | $E$   | 165       |
| 5987.326940                    | 5987.323659                    | 3.281                                                 |                                     | $0.1495 \times 10^{-4}$             |                | 8     | $F_2$ | 2          | 7    | $F_1$ | 253       |
| 5987.383100                    | 5987.391100                    | -8.000                                                | $0.8369 \times 10^{-4}$             | $0.1103 \times 10^{-3}$             | -24.124        | 9     | $A_2$ | 1          | 8    | $A_1$ | 100       |
| 5987.378564                    | 5987.409461                    | -30.897                                               |                                     | $0.5992 \times 10^{-5}$             |                | 2     | $E$   | 1          | 3    | $E$   | 69        |
| 5987.564450                    | 5987.615190                    | -50.740                                               |                                     | $0.1020 \times 10^{-4}$             |                | 2     | $F_2$ | 1          | 3    | $F_1$ | 108       |
| 5988.543480                    | 5988.536400                    | 7.080                                                 | $0.2122 \times 10^{-3}$             | $0.3315 \times 10^{-5}$             | 6300.486       | 7     | $F_1$ | 2          | 6    | $F_2$ | 213       |
| 5988.627284                    | 5988.612645                    | 14.639                                                |                                     | $0.1096 \times 10^{-4}$             |                | 5     | $E$   | 1          | 4    | $E$   | 95        |
| 5988.693625                    | 5988.679472                    | 14.153                                                |                                     | $0.3144 \times 10^{-4}$             |                | 5     | $F_2$ | 1          | 4    | $F_1$ | 137       |
| 5988.782909                    | 5988.773379                    | 9.530                                                 |                                     | $0.1292 \times 10^{-5}$             |                | 7     | $E$   | 1          | 6    | $E$   | 141       |
| 5988.801000                    | 5988.797411                    | 3.589                                                 |                                     | $0.3151 \times 10^{-5}$             |                | 7     | $F_2$ | 2          | 6    | $F_1$ | 205       |
| 5988.819660                    | 5988.828184                    | -8.524                                                |                                     | $0.1297 \times 10^{-4}$             |                | 7     | $A_2$ | 1          | 6    | $A_1$ | 74        |
| 5989.469990                    | 5989.475930                    | -5.940                                                | $0.6791 \times 10^{-4}$             | $0.7425 \times 10^{-4}$             | -8.534         | 5     | $F_2$ | 1          | 4    | $F_1$ | 138       |
| 5989.723572                    | 5989.731198                    | -7.626                                                |                                     | $0.5103 \times 10^{-4}$             |                | 5     | $F_1$ | 2          | 4    | $F_2$ | 143       |
| 5989.736964                    | 5989.745778                    | -8.814                                                |                                     | $0.3366 \times 10^{-4}$             |                | 5     | $F_1$ | 1          | 4    | $F_2$ | 143       |
| 5990.154990                    | 5990.143147                    | 11.843                                                |                                     | $0.4927 \times 10^{-4}$             |                | 7     | $A_2$ | 1          | 6    | $A_1$ | 75        |
| 5990.276340                    | 5990.279600                    | -3.260                                                | $0.9110 \times 10^{-4}$             | $0.5764 \times 10^{-4}$             | 58.057         | 7     | $F_2$ | 1          | 6    | $F_1$ | 206       |
| 5990.349300                    | 5990.370663                    | -21.363                                               | $0.2075 \times 10^{-3}$             | $0.1420 \times 10^{-3}$             | 46.173         | 7     | $F_1$ | 1          | 6    | $F_2$ | 214       |
| 5990.517770                    | 5990.522174                    | -4.404                                                | $0.2215 \times 10^{-3}$             | $0.2507 \times 10^{-3}$             | -11.660        | 5     | $F_1$ | 2          | 4    | $F_2$ | 144       |
| 5990.575760                    | 5990.579768                    | -4.008                                                |                                     | $0.1696 \times 10^{-3}$             |                | 5     | $E$   | 1          | 4    | $E$   | 96        |
| 5993.402210                    | 5993.392595                    | 9.615                                                 | $0.8413 \times 10^{-4}$             | $0.2369 \times 10^{-4}$             | 255.083        | 7     | $E$   | 1          | 6    | $E$   | 144       |
| 5993.382949                    | 5993.398120                    | -15.171                                               | $0.3765 \times 10^{-3}$             | $0.1499 \times 10^{-3}$             | 151.189        | 7     | $A_2$ | 1          | 6    | $A_1$ | 76        |
| 5993.518033                    | 5993.483365                    | 34.668                                                | $0.2972 \times 10^{-3}$             | $0.1293 \times 10^{-3}$             | 129.900        | 11    | $A_2$ | 1          | 11   | $A_1$ | 111       |
| 5993.576076                    | 5993.551921                    | 24.155                                                |                                     | $0.3365 \times 10^{-4}$             |                | 11    | $F_2$ | 2          | 11   | $F_1$ | 350       |
| 5993.594569                    | 5993.601595                    | -7.026                                                | $0.2035 \times 10^{-3}$             | $0.7919 \times 10^{-4}$             | 156.961        | 7     | $F_2$ | 2          | 6    | $F_1$ | 210       |
| 5993.873435                    | 5993.878462                    | -5.027                                                |                                     | $0.3199 \times 10^{-4}$             |                | 7     | $F_1$ | 2          | 6    | $F_2$ | 218       |
| 5993.911902                    | 5993.897509                    | 14.393                                                |                                     | $0.2898 \times 10^{-4}$             |                | 7     | $E$   | 1          | 6    | $E$   | 145       |
| 5993.915513                    | 5993.900390                    | 15.123                                                |                                     | $0.1916 \times 10^{-4}$             |                | 10    | $A_2$ | 1          | 10   | $A_1$ | 109       |
| 5994.143800                    | 5994.139548                    | 4.252                                                 | $0.2701 \times 10^{-2}$             | $0.2709 \times 10^{-2}$             | -0.307         | 1     | $F_1$ | 1          | 0    | $F_2$ | 18        |
| 5994.308000                    | 5994.349841                    | -41.841                                               |                                     | $0.1322 \times 10^{-5}$             |                | 10    | $F_1$ | 1          | 10   | $F_2$ | 321       |
| 5994.453767                    | 5994.456830                    | -3.063                                                |                                     | $0.2472 \times 10^{-7}$             |                | 6     | $E$   | 1          | 5    | $E$   | 116       |
| 5994.833880                    | 5994.822685                    | 11.195                                                |                                     | $0.7528 \times 10^{-6}$             |                | 6     | $F_2$ | 2          | 5    | $F_1$ | 180       |
| 5994.856020                    | 5994.844401                    | 11.619                                                | $0.2894 \times 10^{-4}$             | $0.1241 \times 10^{-6}$             | 23214.360      | 6     | $F_2$ | 1          | 5    | $F_1$ | 180       |
| 5994.994830                    | 5995.007855                    | -13.025                                               |                                     | $0.5916 \times 10^{-4}$             |                | 8     | $F_2$ | 2          | 7    | $F_1$ | 256       |
| 5995.707000                    | 5995.683879                    | 23.121                                                |                                     | $0.2383 \times 10^{-5}$             |                | 9     | $F_1$ | 3          | 9    | $F_2$ | 285       |
| 5995.849370                    | 5995.921881                    | -72.511                                               |                                     | $0.4278 \times 10^{-4}$             |                | 9     | $A_1$ | 1          | 9    | $A_2$ | 99        |
| 5995.991452                    | 5995.996870                    | -5.418                                                |                                     | $0.1341 \times 10^{-5}$             |                | 6     | $F_1$ | 1          | 5    | $F_2$ | 173       |
| 5996.121220                    | 5996.116681                    | 4.539                                                 | $0.1633 \times 10^{-3}$             | $0.5052 \times 10^{-5}$             | 3132.650       | 6     | $E$   | 1          | 5    | $E$   | 117       |
| 5996.138600                    | 5996.135687                    | 2.913                                                 |                                     | $0.1032 \times 10^{-5}$             |                | 6     | $F_2$ | 2          | 5    | $F_1$ | 181       |
| 5996.162440                    | 5996.157403                    | 5.037                                                 | $0.2329 \times 10^{-3}$             | $0.7868 \times 10^{-5}$             | 2859.945       | 6     | $F_2$ | 1          | 5    | $F_1$ | 181       |

Table II (continued).

| $\tilde{\nu}_e/\text{cm}^{-1}$ | $\tilde{\nu}_c/\text{cm}^{-1}$ | $\tilde{\nu}_e - \tilde{\nu}_c/10^{-3}\text{cm}^{-1}$ | $I_e/\text{cm}^{-2}\text{atm}^{-1}$ | $I_c/\text{cm}^{-2}\text{atm}^{-1}$ | $I_e - I_c/\%$ | $J''$ | $C''$ | $\alpha''$ | $J'$ | $C'$  | $\alpha'$ |
|--------------------------------|--------------------------------|-------------------------------------------------------|-------------------------------------|-------------------------------------|----------------|-------|-------|------------|------|-------|-----------|
| 5996.202494                    | 5996.200063                    | 2.431                                                 | $0.6043 \times 10^{-3}$             | $0.1789 \times 10^{-4}$             | 3277.545       | 6     | $A_2$ | 1          | 5    | $A_1$ | 55        |
| 5996.348850                    | 5996.382339                    | -33.489                                               |                                     | $0.7655 \times 10^{-4}$             |                | 10    | $F_1$ | 2          | 10   | $F_2$ | 323       |
| 5996.857660                    | 5996.833512                    | 24.148                                                |                                     | $0.2624 \times 10^{-5}$             |                | 7     | $F_2$ | 2          | 6    | $F_1$ | 212       |
| 5996.899051                    | 5996.974705                    | -75.654                                               |                                     | $0.9021 \times 10^{-4}$             |                | 10    | $E$   | 2          | 10   | $E$   | 215       |
| 5997.175000                    | 5997.173874                    | 1.126                                                 |                                     | $0.6841 \times 10^{-5}$             |                | 6     | $A_1$ | 1          | 5    | $A_2$ | 62        |
| 5997.267327                    | 5997.263039                    | 4.288                                                 |                                     | $0.3376 \times 10^{-5}$             |                | 6     | $F_1$ | 1          | 5    | $F_2$ | 174       |
| 5997.321000                    | 5997.314834                    | 6.166                                                 |                                     | $0.3465 \times 10^{-5}$             |                | 6     | $F_2$ | 2          | 5    | $F_1$ | 182       |
| 5997.339463                    | 5997.336550                    | 2.913                                                 |                                     | $0.2782 \times 10^{-6}$             |                | 6     | $F_2$ | 1          | 5    | $F_1$ | 182       |
| 5997.553153                    | 5997.504224                    | 48.929                                                |                                     | $0.2883 \times 10^{-2}$             |                | 11    | $A_2$ | 1          | 11   | $A_1$ | 112       |
| 5997.823440                    | 5997.826447                    | -3.007                                                |                                     | $0.1701 \times 10^{-3}$             |                | 12    | $F_1$ | 2          | 12   | $F_2$ | 381       |
| 5998.228400                    | 5998.232533                    | -4.133                                                |                                     | $0.1890 \times 10^{-2}$             |                | 10    | $E$   | 2          | 10   | $E$   | 217       |
| 5998.240500                    | 5998.286678                    | -46.178                                               |                                     | $0.1934 \times 10^{-3}$             |                | 10    | $F_1$ | 2          | 10   | $F_2$ | 326       |
| 5998.280400                    | 5998.288295                    | -7.895                                                | $0.5074 \times 10^{-2}$             | $0.5856 \times 10^{-2}$             | -13.351        | 10    | $A_1$ | 1          | 10   | $A_2$ | 105       |
| 5998.320610                    | 5998.320448                    | 0.162                                                 |                                     | $0.1974 \times 10^{-3}$             |                | 10    | $F_1$ | 1          | 10   | $F_2$ | 325       |
| 5998.441156                    | 5998.409258                    | 31.898                                                |                                     | $0.1374 \times 10^{-3}$             |                | 10    | $F_2$ | 1          | 10   | $F_1$ | 317       |
| 5998.440956                    | 5998.430788                    | 10.168                                                |                                     | $0.1782 \times 10^{-2}$             |                | 10    | $E$   | 1          | 10   | $E$   | 216       |
| 5998.441356                    | 5998.440421                    | 0.935                                                 | $0.4435 \times 10^{-2}$             | $0.5488 \times 10^{-2}$             | -19.182        | 10    | $A_2$ | 1          | 10   | $A_1$ | 111       |
| 5998.577080                    | 5998.587919                    | -10.839                                               | $0.2249 \times 10^{-4}$             | $0.1999 \times 10^{-4}$             | 12.509         | 7     | $F_2$ | 1          | 7    | $F_1$ | 231       |
| 5998.681000                    | 5998.665113                    | 15.887                                                |                                     | $0.1414 \times 10^{-4}$             |                | 7     | $F_1$ | 1          | 7    | $F_2$ | 227       |
| 5999.270530                    | 5999.290450                    | -19.920                                               |                                     | $0.9829 \times 10^{-5}$             |                | 12    | $F_2$ | 1          | 12   | $F_1$ | 377       |
| 5999.445071                    | 5999.436030                    | 9.041                                                 |                                     | $0.3483 \times 10^{-5}$             |                | 3     | $F_1$ | 1          | 4    | $F_2$ | 136       |
| 5999.474300                    | 5999.463706                    | 10.594                                                | $0.8195 \times 10^{-2}$             | $0.9328 \times 10^{-2}$             | -12.142        | 9     | $A_2$ | 1          | 9    | $A_1$ | 95        |
| 5999.519000                    | 5999.513245                    | 5.755                                                 | $0.8562 \times 10^{-2}$             | $0.9150 \times 10^{-2}$             | -6.425         | 9     | $A_1$ | 1          | 9    | $A_2$ | 100       |
| 5999.543000                    | 5999.560054                    | -17.054                                               | $0.3425 \times 10^{-2}$             | $0.3592 \times 10^{-2}$             | -4.638         | 9     | $E$   | 1          | 9    | $E$   | 193       |
| 5999.625400                    | 5999.606764                    | 18.636                                                |                                     | $0.4264 \times 10^{-2}$             |                | 9     | $F_2$ | 1          | 9    | $F_1$ | 296       |
| 5999.634300                    | 5999.640433                    | -6.133                                                | $0.4428 \times 10^{-2}$             | $0.1199 \times 10^{-3}$             | 3594.418       | 9     | $F_1$ | 1          | 9    | $F_2$ | 289       |
| 5999.779990                    | 5999.788104                    | -8.114                                                | $0.4391 \times 10^{-4}$             | $0.4953 \times 10^{-4}$             | -11.350        | 8     | $F_2$ | 1          | 7    | $F_1$ | 257       |
| 5999.810120                    | 5999.822134                    | -12.014                                               | $0.6111 \times 10^{-4}$             | $0.5101 \times 10^{-4}$             | 19.803         | 6     | $A_2$ | 1          | 6    | $A_1$ | 70        |
| 5999.855240                    | 5999.853798                    | 1.442                                                 | $0.1387 \times 10^{-3}$             | $0.7898 \times 10^{-4}$             | 75.614         | 6     | $F_2$ | 1          | 5    | $F_1$ | 183       |
| 5999.885640                    | 5999.894838                    | -9.198                                                | $0.1332 \times 10^{-3}$             | $0.7722 \times 10^{-4}$             | 72.500         | 6     | $E$   | 1          | 5    | $E$   | 118       |
| 6000.070470                    | 6000.099646                    | -29.176                                               | $0.5563 \times 10^{-4}$             | $0.7470 \times 10^{-4}$             | -25.530        | 12    | $F_1$ | 2          | 12   | $F_2$ | 384       |
| 6000.198430                    | 6000.217981                    | -19.551                                               | $0.1299 \times 10^{-4}$             | $0.1573 \times 10^{-4}$             | -17.418        | 3     | $F_1$ | 1          | 4    | $F_2$ | 137       |
| 6000.245120                    | 6000.235681                    | 9.439                                                 | $0.2337 \times 10^{-3}$             | $0.1750 \times 10^{-3}$             | 33.528         | 6     | $A_2$ | 1          | 5    | $A_1$ | 56        |
| 6000.271144                    | 6000.259169                    | 11.975                                                |                                     | $0.2179 \times 10^{-4}$             |                | 6     | $F_2$ | 2          | 5    | $F_1$ | 184       |
| 6000.303430                    | 6000.277510                    | 25.920                                                |                                     | $0.5753 \times 10^{-5}$             |                | 3     | $F_2$ | 1          | 4    | $F_1$ | 131       |
| 6000.483120                    | 6000.479987                    | 3.133                                                 |                                     | $0.5014 \times 10^{-5}$             |                | 4     | $F_2$ | 1          | 3    | $F_1$ | 113       |
| 6000.456500                    | 6000.488226                    | -31.726                                               |                                     | $0.4357 \times 10^{-4}$             |                | 12    | $E$   | 2          | 12   | $E$   | 256       |
| 6000.640770                    | 6000.640359                    | 0.411                                                 |                                     | $0.3905 \times 10^{-2}$             |                | 8     | $E$   | 2          | 8    | $E$   | 175       |
| 6000.661280                    | 6000.658916                    | 2.364                                                 | $0.7843 \times 10^{-2}$             | $0.5988 \times 10^{-2}$             | 30.972         | 8     | $F_1$ | 2          | 8    | $F_2$ | 263       |
| 6000.745080                    | 6000.737323                    | 7.757                                                 | $0.4359 \times 10^{-2}$             | $0.3752 \times 10^{-2}$             | 16.185         | 8     | $E$   | 1          | 8    | $E$   | 176       |
| 6000.748320                    | 6000.740979                    | 7.341                                                 | $0.7041 \times 10^{-2}$             | $0.5794 \times 10^{-2}$             | 21.531         | 8     | $F_1$ | 1          | 8    | $F_2$ | 264       |
| 6000.748480                    | 6000.744798                    | 3.682                                                 | $0.1159 \times 10^{-1}$             | $0.1266 \times 10^{-1}$             | -8.426         | 8     | $A_1$ | 1          | 8    | $A_2$ | 84        |
| 6000.763000                    | 6000.760037                    | 2.963                                                 |                                     | $0.6175 \times 10^{-4}$             |                | 4     | $E$   | 1          | 3    | $E$   | 72        |
| 6000.975337                    | 6000.988018                    | -12.681                                               |                                     | $0.1875 \times 10^{-4}$             |                | 5     | $F_2$ | 1          | 5    | $F_1$ | 173       |
| 6001.005043                    | 6001.020554                    | -15.511                                               |                                     | $0.6809 \times 10^{-5}$             |                | 5     | $F_1$ | 1          | 5    | $F_2$ | 164       |
| 6001.036440                    | 6001.036401                    | 0.039                                                 | $0.3586 \times 10^{-4}$             | $0.3796 \times 10^{-4}$             | -5.537         | 4     | $F_1$ | 1          | 3    | $F_2$ | 108       |
| 6001.210730                    | 6001.206717                    | 4.013                                                 | $0.1720 \times 10^{-4}$             | $0.1272 \times 10^{-4}$             | 35.170         | 7     | $F_1$ | 2          | 6    | $F_2$ | 221       |
| 6001.401320                    | 6001.399049                    | 2.271                                                 | $0.1799 \times 10^{-3}$             | $0.2023 \times 10^{-3}$             | -11.091        | 4     | $F_2$ | 1          | 3    | $F_1$ | 114       |
| 6001.653470                    | 6001.655355                    | -1.885                                                | $0.1027 \times 10^{-1}$             | $0.1055 \times 10^{-1}$             | -2.673         | 7     | $F_1$ | 2          | 7    | $F_2$ | 228       |
| 6001.676450                    | 6001.668341                    | 8.109                                                 | $0.7391 \times 10^{-2}$             | $0.7007 \times 10^{-2}$             | 5.476          | 7     | $E$   | 1          | 7    | $E$   | 153       |

Table II (continued).

| $\tilde{\nu}_e/\text{cm}^{-1}$ | $\tilde{\nu}_c/\text{cm}^{-1}$ | $\tilde{\nu}_e - \tilde{\nu}_c/10^{-3}\text{cm}^{-1}$ | $I_e/\text{cm}^{-2}\text{atm}^{-1}$ | $I_c/\text{cm}^{-2}\text{atm}^{-1}$ | $I_e - I_c/\%$ | $J''$ | $C''$ | $\alpha''$ | $J'$ | $C'$  | $\alpha'$ |
|--------------------------------|--------------------------------|-------------------------------------------------------|-------------------------------------|-------------------------------------|----------------|-------|-------|------------|------|-------|-----------|
| 6001.665770                    | 6001.677285                    | -11.515                                               | $0.1027 \times 10^{-1}$             | $0.1001 \times 10^{-1}$             | 2.615          | 7     | $F_2$ | 2          | 7    | $F_1$ | 233       |
| 6001.686040                    | 6001.699122                    | -13.082                                               | $0.1705 \times 10^{-1}$             | $0.1733 \times 10^{-1}$             | -1.633         | 7     | $A_2$ | 1          | 7    | $A_1$ | 72        |
| 6001.739190                    | 6001.735349                    | 3.841                                                 | $0.9079 \times 10^{-2}$             | $0.9806 \times 10^{-2}$             | -7.416         | 7     | $F_2$ | 1          | 7    | $F_1$ | 234       |
| 6001.741720                    | 6001.742499                    | -0.779                                                | $0.9345 \times 10^{-2}$             | $0.1023 \times 10^{-1}$             | -8.652         | 7     | $F_1$ | 1          | 7    | $F_2$ | 229       |
| 6001.923776                    | 6001.902986                    | 20.790                                                |                                     | $0.3210 \times 10^{-5}$             |                | 6     | $F_2$ | 2          | 5    | $F_1$ | 186       |
| 6001.985620                    | 6001.998959                    | -13.339                                               |                                     | $0.6422 \times 10^{-5}$             |                | 4     | $F_1$ | 1          | 4    | $F_2$ | 140       |
| 6002.072440                    | 6002.066568                    | 5.872                                                 |                                     | $0.4788 \times 10^{-5}$             |                | 9     | $A_1$ | 1          | 9    | $A_2$ | 101       |
| 6002.212970                    | 6002.216002                    | -3.032                                                | $0.1883 \times 10^{-3}$             | $0.5033 \times 10^{-4}$             | 274.115        | 6     | $A_1$ | 1          | 5    | $A_2$ | 63        |
| 6002.363560                    | 6002.363590                    | -0.030                                                | $0.6534 \times 10^{-4}$             | $0.1417 \times 10^{-4}$             | 360.978        | 6     | $F_1$ | 1          | 5    | $F_2$ | 178       |
| 6002.517200                    | 6002.521956                    | -4.756                                                | $0.2231 \times 10^{-1}$             | $0.2188 \times 10^{-1}$             | 1.976          | 6     | $A_1$ | 1          | 6    | $A_2$ | 65        |
| 6002.530500                    | 6002.531867                    | -1.367                                                | $0.1335 \times 10^{-1}$             | $0.1308 \times 10^{-1}$             | 2.033          | 6     | $F_1$ | 1          | 6    | $F_2$ | 203       |
| 6002.534280                    | 6002.543470                    | -9.190                                                | $0.1371 \times 10^{-1}$             | $0.1298 \times 10^{-1}$             | 5.591          | 6     | $F_2$ | 2          | 6    | $F_1$ | 195       |
| 6002.592200                    | 6002.581520                    | 10.680                                                | $0.2006 \times 10^{-1}$             | $0.2148 \times 10^{-1}$             | -6.625         | 6     | $A_2$ | 1          | 6    | $A_1$ | 71        |
| 6002.584780                    | 6002.597230                    | -12.450                                               | $0.1204 \times 10^{-1}$             | $0.1279 \times 10^{-1}$             | -5.899         | 6     | $F_2$ | 1          | 6    | $F_1$ | 196       |
| 6002.596910                    | 6002.601906                    | -4.996                                                | $0.8080 \times 10^{-2}$             | $0.8556 \times 10^{-2}$             | -5.567         | 6     | $E$   | 1          | 6    | $E$   | 134       |
| 6002.782658                    | 6002.786523                    | -3.865                                                |                                     | $0.3086 \times 10^{-5}$             |                | 3     | $F_1$ | 1          | 3    | $F_2$ | 105       |
| 6002.836833                    | 6002.848061                    | -11.228                                               |                                     | $0.6899 \times 10^{-5}$             |                | 3     | $F_2$ | 1          | 3    | $F_1$ | 110       |
| 6003.058240                    | 6003.068258                    | -10.018                                               |                                     | $0.4296 \times 10^{-4}$             |                | 7     | $E$   | 1          | 6    | $E$   | 147       |
| 6003.250100                    | 6003.253200                    | -3.100                                                | $0.1527 \times 10^{-1}$             | $0.1508 \times 10^{-1}$             | 1.294          | 5     | $F_1$ | 2          | 5    | $F_2$ | 165       |
| 6003.254420                    | 6003.260860                    | -6.440                                                | $0.1030 \times 10^{-1}$             | $0.1003 \times 10^{-1}$             | 2.674          | 5     | $E$   | 1          | 5    | $E$   | 112       |
| 6003.298150                    | 6003.299443                    | -1.293                                                | $0.1312 \times 10^{-1}$             | $0.1492 \times 10^{-1}$             | -12.047        | 5     | $F_2$ | 1          | 5    | $F_1$ | 174       |
| 6003.310660                    | 6003.316676                    | -6.016                                                | $0.1513 \times 10^{-1}$             | $0.1487 \times 10^{-1}$             | 1.726          | 5     | $F_1$ | 1          | 5    | $F_2$ | 166       |
| 6003.523750                    | 6003.529558                    | -5.808                                                | $0.1979 \times 10^{-3}$             | $0.5363 \times 10^{-4}$             | 269.007        | 6     | $F_2$ | 2          | 5    | $F_1$ | 187       |
| 6003.544943                    | 6003.551274                    | -6.331                                                |                                     | $0.2050 \times 10^{-5}$             |                | 6     | $F_2$ | 1          | 5    | $F_1$ | 187       |
| 6003.836820                    | 6003.839269                    | -2.449                                                | $0.1603 \times 10^{-1}$             | $0.1594 \times 10^{-1}$             | 0.579          | 4     | $F_2$ | 1          | 4    | $F_1$ | 135       |
| 6003.869010                    | 6003.870306                    | -1.296                                                | $0.1017 \times 10^{-1}$             | $0.1056 \times 10^{-1}$             | -3.735         | 4     | $E$   | 1          | 4    | $E$   | 94        |
| 6003.878560                    | 6003.880946                    | -2.386                                                | $0.1527 \times 10^{-1}$             | $0.1582 \times 10^{-1}$             | -3.492         | 4     | $F_1$ | 1          | 4    | $F_2$ | 141       |
| 6003.892130                    | 6003.895982                    | -3.852                                                | $0.2569 \times 10^{-1}$             | $0.2632 \times 10^{-1}$             | -2.401         | 4     | $A_1$ | 1          | 4    | $A_2$ | 43        |
| 6004.104110                    | 6004.107990                    | -3.880                                                | $0.2835 \times 10^{-4}$             | $0.5900 \times 10^{-6}$             | 4704.711       | 5     | $E$   | 1          | 4    | $E$   | 97        |
| 6004.292580                    | 6004.292366                    | 0.214                                                 | $0.2488 \times 10^{-1}$             | $0.2537 \times 10^{-1}$             | -1.921         | 3     | $A_2$ | 1          | 3    | $A_1$ | 32        |
| 6004.313360                    | 6004.312837                    | 0.523                                                 | $0.1485 \times 10^{-1}$             | $0.1517 \times 10^{-1}$             | -2.120         | 3     | $F_2$ | 1          | 3    | $F_1$ | 111       |
| 6004.328640                    | 6004.329166                    | -0.526                                                | $0.1483 \times 10^{-1}$             | $0.1514 \times 10^{-1}$             | -2.067         | 3     | $F_1$ | 1          | 3    | $F_2$ | 106       |
| 6004.448000                    | 6004.446291                    | 1.709                                                 |                                     | $0.3427 \times 10^{-6}$             |                | 5     | $F_1$ | 2          | 4    | $F_2$ | 146       |
| 6004.462230                    | 6004.460871                    | 1.359                                                 | $0.6444 \times 10^{-4}$             | $0.5647 \times 10^{-6}$             | 11311.628      | 5     | $F_1$ | 1          | 4    | $F_2$ | 146       |
| 6004.644350                    | 6004.641255                    | 3.095                                                 | $0.1239 \times 10^{-1}$             | $0.1265 \times 10^{-1}$             | -2.041         | 2     | $F_2$ | 1          | 2    | $F_1$ | 73        |
| 6004.652530                    | 6004.650354                    | 2.176                                                 | $0.8249 \times 10^{-2}$             | $0.8425 \times 10^{-2}$             | -2.088         | 2     | $E$   | 1          | 2    | $E$   | 53        |
| 6004.862840                    | 6004.858389                    | 4.451                                                 | $0.8242 \times 10^{-2}$             | $0.8409 \times 10^{-2}$             | -1.982         | 1     | $F_1$ | 1          | 1    | $F_2$ | 43        |
| 6005.049020                    | 6005.052010                    | -2.990                                                |                                     | $0.2618 \times 10^{-5}$             |                | 4     | $F_2$ | 1          | 4    | $F_1$ | 136       |
| 6005.396126                    | 6005.397894                    | -1.768                                                | $0.3997 \times 10^{-3}$             | $0.4771 \times 10^{-5}$             | 8278.267       | 5     | $F_1$ | 1          | 4    | $F_2$ | 147       |
| 6005.413797                    | 6005.401441                    | 12.356                                                | $0.3589 \times 10^{-3}$             | $0.7074 \times 10^{-4}$             | 407.349        | 6     | $A_1$ | 1          | 5    | $A_2$ | 64        |
| 6005.460677                    | 6005.469889                    | -9.212                                                | $0.3951 \times 10^{-3}$             | $0.6953 \times 10^{-5}$             | 5582.794       | 5     | $F_2$ | 1          | 4    | $F_1$ | 141       |
| 6005.963880                    | 6005.950086                    | 13.794                                                | $0.6194 \times 10^{-4}$             | $0.9838 \times 10^{-5}$             | 529.623        | 6     | $F_1$ | 1          | 5    | $F_2$ | 180       |
| 6006.067053                    | 6006.058424                    | 8.629                                                 | $0.1627 \times 10^{-3}$             | $0.8923 \times 10^{-4}$             | 82.328         | 7     | $A_2$ | 1          | 6    | $A_1$ | 77        |
| 6006.147957                    | 6006.150567                    | -2.610                                                | $0.3701 \times 10^{-3}$             | $0.3887 \times 10^{-5}$             | 9421.139       | 5     | $F_1$ | 2          | 4    | $F_2$ | 148       |
| 6006.166082                    | 6006.166199                    | -0.117                                                | $0.2427 \times 10^{-3}$             | $0.2505 \times 10^{-5}$             | 9590.347       | 5     | $E$   | 1          | 4    | $E$   | 98        |
| 6006.212862                    | 6006.204949                    | 7.913                                                 |                                     | $0.1199 \times 10^{-5}$             |                | 6     | $E$   | 1          | 5    | $E$   | 121       |
| 6006.524000                    | 6006.524468                    | -0.468                                                |                                     | $0.8665 \times 10^{-6}$             |                | 6     | $F_2$ | 2          | 5    | $F_1$ | 188       |
| 6006.548084                    | 6006.546184                    | 1.900                                                 | $0.9003 \times 10^{-5}$             | $0.6918 \times 10^{-6}$             | 1201.400       | 6     | $F_2$ | 1          | 5    | $F_1$ | 188       |
| 6006.653000                    | 6006.650445                    | 2.555                                                 |                                     | $0.4738 \times 10^{-5}$             |                | 7     | $F_2$ | 2          | 6    | $F_1$ | 215       |
| 6006.690010                    | 6006.688464                    | 1.546                                                 | $0.1216 \times 10^{-3}$             | $0.5756 \times 10^{-4}$             | 111.255        | 7     | $F_2$ | 1          | 6    | $F_1$ | 215       |



Table II (continued).

| $\tilde{\nu}_e/\text{cm}^{-1}$ | $\tilde{\nu}_c/\text{cm}^{-1}$ | $\tilde{\nu}_e - \tilde{\nu}_c/10^{-3}\text{cm}^{-1}$ | $I_e/\text{cm}^{-2}\text{atm}^{-1}$ | $I_c/\text{cm}^{-2}\text{atm}^{-1}$ | $I_e - I_c/\%$ | $J''$ | $C''$ | $\alpha''$ | $J'$ | $C'$  | $\alpha'$ |
|--------------------------------|--------------------------------|-------------------------------------------------------|-------------------------------------|-------------------------------------|----------------|-------|-------|------------|------|-------|-----------|
| 6006.955760                    | 6006.956687                    | -0.927                                                | $0.1230 \times 10^{-3}$             | $0.6459 \times 10^{-4}$             | 90.441         | 7     | $F_1$ | 1          | 6    | $F_2$ | 223       |
| 6009.241689                    | 6009.244210                    | -2.521                                                |                                     | $0.3458 \times 10^{-5}$             |                | 6     | $F_1$ | 1          | 5    | $F_2$ | 181       |
| 6009.547190                    | 6009.544138                    | 3.052                                                 | $0.2032 \times 10^{-3}$             | $0.7526 \times 10^{-4}$             | 170.002        | 5     | $F_1$ | 1          | 4    | $F_2$ | 149       |
| 6009.808898                    | 6009.819922                    | -11.024                                               | $0.2461 \times 10^{-3}$             | $0.8613 \times 10^{-4}$             | 185.717        | 6     | $A_1$ | 1          | 5    | $A_2$ | 65        |
| 6009.893563                    | 6009.889730                    | 3.833                                                 | $0.1900 \times 10^{-3}$             | $0.6661 \times 10^{-4}$             | 185.264        | 5     | $F_2$ | 1          | 4    | $F_1$ | 142       |
| 6010.217707                    | 6010.203467                    | 14.240                                                |                                     | $0.1074 \times 10^{-4}$             |                | 5     | $F_1$ | 2          | 4    | $F_2$ | 150       |
| 6010.231000                    | 6010.218047                    | 12.953                                                |                                     | $0.8177 \times 10^{-5}$             |                | 5     | $F_1$ | 1          | 4    | $F_2$ | 150       |
| 6010.287750                    | 6010.271134                    | 16.616                                                | $0.9543 \times 10^{-5}$             | $0.5098 \times 10^{-5}$             | 87.205         | 5     | $F_2$ | 1          | 4    | $F_1$ | 143       |
| 6010.574070                    | 6010.574580                    | -0.510                                                | $0.1613 \times 10^{-3}$             | $0.4973 \times 10^{-4}$             | 224.382        | 6     | $F_1$ | 1          | 5    | $F_2$ | 182       |
| 6010.661210                    | 6010.678181                    | -16.971                                               | $0.1901 \times 10^{-4}$             | $0.2006 \times 10^{-5}$             | 847.747        | 5     | $E$   | 1          | 4    | $E$   | 100       |
| 6010.721412                    | 6010.732088                    | -10.676                                               | $0.9304 \times 10^{-5}$             | $0.8598 \times 10^{-8}$             | 108116.212     | 5     | $F_2$ | 1          | 4    | $F_1$ | 144       |
| 6011.110280                    | 6011.108518                    | 1.762                                                 | $0.5864 \times 10^{-4}$             | $0.7757 \times 10^{-5}$             | 655.914        | 5     | $F_1$ | 2          | 4    | $F_2$ | 151       |
| 6011.209370                    | 6011.206090                    | 3.280                                                 | $0.1464 \times 10^{-3}$             | $0.4981 \times 10^{-4}$             | 193.903        | 6     | $F_2$ | 2          | 5    | $F_1$ | 189       |
| 6011.230700                    | 6011.227806                    | 2.894                                                 | $0.3332 \times 10^{-4}$             | $0.5853 \times 10^{-5}$             | 469.287        | 6     | $F_2$ | 1          | 5    | $F_1$ | 189       |
| 6011.606710                    | 6011.589551                    | 17.159                                                | $0.1122 \times 10^{-4}$             | $0.1265 \times 10^{-4}$             | -11.281        | 3     | $F_1$ | 1          | 2    | $F_2$ | 82        |
| 6011.831000                    | 6011.824833                    | 6.167                                                 |                                     | $0.8469 \times 10^{-7}$             |                | 4     | $E$   | 1          | 3    | $E$   | 73        |
| 6011.993952                    | 6011.982923                    | 11.029                                                | $0.6202 \times 10^{-4}$             | $0.6289 \times 10^{-4}$             | -1.389         | 3     | $F_2$ | 1          | 2    | $F_1$ | 74        |
| 6012.089486                    | 6012.086535                    | 2.951                                                 | $0.4041 \times 10^{-3}$             | $0.1093 \times 10^{-3}$             | 269.838        | 6     | $A_2$ | 1          | 5    | $A_1$ | 58        |
| 6012.188438                    | 6012.176899                    | 11.539                                                | $0.1883 \times 10^{-3}$             | $0.2093 \times 10^{-3}$             | -10.021        | 3     | $A_2$ | 1          | 2    | $A_1$ | 30        |
| 6012.367840                    | 6012.359896                    | 7.944                                                 |                                     | $0.7478 \times 10^{-5}$             |                | 4     | $F_1$ | 1          | 5    | $F_2$ | 160       |
| 6012.644910                    | 6012.661753                    | -16.843                                               | $0.3572 \times 10^{-4}$             | $0.4718 \times 10^{-4}$             | -24.284        | 4     | $A_1$ | 1          | 5    | $A_2$ | 57        |
| 6013.395286                    | 6013.386785                    | 8.501                                                 |                                     | $0.2847 \times 10^{-5}$             |                | 6     | $F_2$ | 2          | 5    | $F_1$ | 190       |
| 6013.418990                    | 6013.408501                    | 10.489                                                | $0.1808 \times 10^{-3}$             | $0.5511 \times 10^{-4}$             | 228.073        | 6     | $F_2$ | 1          | 5    | $F_1$ | 190       |
| 6013.627090                    | 6013.558271                    | 68.819                                                | $0.3371 \times 10^{-4}$             | $0.2550 \times 10^{-4}$             | 32.188         | 4     | $F_2$ | 1          | 5    | $F_1$ | 169       |
| 6013.570950                    | 6013.561260                    | 9.690                                                 | $0.1475 \times 10^{-3}$             | $0.3947 \times 10^{-4}$             | 273.687        | 6     | $E$   | 1          | 5    | $E$   | 123       |
| 6013.788260                    | 6013.792079                    | -3.819                                                | $0.1657 \times 10^{-3}$             | $0.2398 \times 10^{-4}$             | 591.100        | 5     | $E$   | 1          | 4    | $E$   | 101       |
| 6013.946000                    | 6013.946129                    | -0.129                                                | $0.1694 \times 10^{-3}$             | $0.2675 \times 10^{-4}$             | 533.277        | 5     | $F_1$ | 2          | 4    | $F_2$ | 152       |
| 6013.958000                    | 6013.960709                    | -2.709                                                |                                     | $0.1302 \times 10^{-5}$             |                | 5     | $F_1$ | 1          | 4    | $F_2$ | 152       |
| 6013.997760                    | 6013.996501                    | 1.259                                                 | $0.4164 \times 10^{-4}$             | $0.3533 \times 10^{-6}$             | 11685.691      | 4     | $F_1$ | 1          | 3    | $F_2$ | 109       |
| 6014.613261                    | 6014.625033                    | -11.772                                               | $0.7726 \times 10^{-3}$             | $0.5410 \times 10^{-5}$             | 14179.930      | 4     | $A_1$ | 1          | 3    | $A_2$ | 41        |
| 6014.885069                    | 6014.895090                    | -10.021                                               | $0.4281 \times 10^{-3}$             | $0.3396 \times 10^{-5}$             | 12506.712      | 4     | $F_1$ | 1          | 3    | $F_2$ | 110       |
| 6014.939176                    | 6014.955710                    | -16.534                                               | $0.3205 \times 10^{-3}$             | $0.2671 \times 10^{-5}$             | 11898.816      | 4     | $E$   | 1          | 3    | $E$   | 74        |
| 6015.341522                    | 6015.348605                    | -7.083                                                | $0.4741 \times 10^{-3}$             | $0.2943 \times 10^{-5}$             | 16007.545      | 4     | $F_2$ | 1          | 3    | $F_1$ | 117       |
| 6015.459008                    | 6015.454486                    | 4.522                                                 | $0.7427 \times 10^{-4}$             | $0.8241 \times 10^{-5}$             | 801.219        | 5     | $F_1$ | 2          | 4    | $F_2$ | 153       |
| 6015.664190                    | 6015.658871                    | 5.319                                                 | $0.1506 \times 10^{-1}$             | $0.1525 \times 10^{-1}$             | -1.241         | 0     | $A_1$ | 1          | 1    | $A_2$ | 18        |
| 6018.333940                    | 6018.340243                    | -6.303                                                | $0.2079 \times 10^{-3}$             | $0.3743 \times 10^{-4}$             | 455.455        | 5     | $F_1$ | 2          | 4    | $F_2$ | 154       |
| 6018.952114                    | 6018.948454                    | 3.660                                                 | $0.1452 \times 10^{-3}$             | $0.2523 \times 10^{-4}$             | 475.448        | 5     | $E$   | 1          | 4    | $E$   | 102       |
| 6019.401609                    | 6019.398927                    | 2.682                                                 | $0.3347 \times 10^{-3}$             | $0.8141 \times 10^{-4}$             | 311.121        | 4     | $A_1$ | 1          | 3    | $A_2$ | 42        |
| 6019.557701                    | 6019.552864                    | 4.837                                                 | $0.1527 \times 10^{-3}$             | $0.3506 \times 10^{-4}$             | 335.504        | 4     | $F_1$ | 1          | 3    | $F_2$ | 111       |
| 6019.748336                    | 6019.739721                    | 8.615                                                 | $0.3085 \times 10^{-3}$             | $0.4930 \times 10^{-4}$             | 525.784        | 5     | $F_2$ | 1          | 4    | $F_1$ | 148       |
| 6019.808557                    | 6019.800818                    | 7.739                                                 | $0.4169 \times 10^{-4}$             | $0.6731 \times 10^{-5}$             | 519.417        | 4     | $F_2$ | 1          | 3    | $F_1$ | 118       |
| 6019.836249                    | 6019.837153                    | -0.904                                                | $0.9876 \times 10^{-4}$             | $0.2243 \times 10^{-4}$             | 340.218        | 4     | $E$   | 1          | 3    | $E$   | 75        |
| 6020.081403                    | 6020.088158                    | -6.755                                                | $0.1712 \times 10^{-4}$             | $0.3841 \times 10^{-5}$             | 345.702        | 4     | $F_1$ | 1          | 3    | $F_2$ | 112       |
| 6020.229609                    | 6020.237263                    | -7.654                                                | $0.1667 \times 10^{-4}$             | $0.1571 \times 10^{-5}$             | 960.870        | 4     | $F_2$ | 1          | 3    | $F_1$ | 119       |
| 6020.381000                    | 6020.384804                    | -3.804                                                |                                     | $0.2220 \times 10^{-6}$             |                | 4     | $E$   | 1          | 3    | $E$   | 76        |
| 6020.736353                    | 6020.722315                    | 14.038                                                | $0.2757 \times 10^{-3}$             | $0.4653 \times 10^{-4}$             | 492.574        | 5     | $F_1$ | 1          | 4    | $F_2$ | 155       |
| 6022.745480                    | 6022.723035                    | 22.445                                                | $0.2370 \times 10^{-4}$             | $0.2193 \times 10^{-4}$             | 8.065          | 2     | $F_2$ | 1          | 1    | $F_1$ | 52        |
| 6023.383980                    | 6023.384965                    | -0.985                                                | $0.1676 \times 10^{-4}$             | $0.6282 \times 10^{-7}$             | 26581.462      | 3     | $F_2$ | 1          | 2    | $F_1$ | 75        |
| 6024.207458                    | 6024.208231                    | -0.773                                                | $0.2762 \times 10^{-3}$             | $0.2197 \times 10^{-4}$             | 1157.253       | 4     | $F_2$ | 1          | 3    | $F_1$ | 120       |
| 6024.356096                    | 6024.374738                    | -18.642                                               | $0.4802 \times 10^{-3}$             | $0.1232 \times 10^{-5}$             | 38867.505      | 3     | $F_1$ | 1          | 2    | $F_2$ | 84        |

Table II (continued).

| $\tilde{\nu}_e/\text{cm}^{-1}$ | $\tilde{\nu}_c/\text{cm}^{-1}$ | $\tilde{\nu}_e - \tilde{\nu}_c/10^{-3}\text{cm}^{-1}$ | $I_e/\text{cm}^{-2}\text{atm}^{-1}$ | $I_c/\text{cm}^{-2}\text{atm}^{-1}$ | $I_e - I_c/\%$ | $J''$ | $C''$ | $\alpha''$ | $J'$ | $C'$  | $\alpha'$ |
|--------------------------------|--------------------------------|-------------------------------------------------------|-------------------------------------|-------------------------------------|----------------|-------|-------|------------|------|-------|-----------|
| 6024.376274                    | 6024.383898                    | -7.624                                                |                                     | $0.2058 \times 10^{-5}$             |                | 4     | $F_1$ | 1          | 3    | $F_2$ | 114       |
| 6024.591677                    | 6024.604011                    | -12.334                                               | $0.4841 \times 10^{-3}$             | $0.1192 \times 10^{-5}$             | 40509.133      | 3     | $F_2$ | 1          | 2    | $F_1$ | 76        |
| 6024.791979                    | 6024.800044                    | -8.065                                                | $0.8511 \times 10^{-3}$             | $0.1806 \times 10^{-5}$             | 47037.213      | 3     | $A_2$ | 1          | 2    | $A_1$ | 31        |
| 6025.115295                    | 6025.122260                    | -6.965                                                | $0.3870 \times 10^{-4}$             | $0.1781 \times 10^{-5}$             | 2073.401       | 4     | $E$   | 1          | 3    | $E$   | 77        |
| 6025.348000                    | 6025.353693                    | -5.693                                                |                                     | $0.4958 \times 10^{-5}$             |                | 5     | $F_2$ | 1          | 6    | $F_1$ | 189       |
| 6026.227230                    | 6026.223793                    | 3.437                                                 | $0.1473 \times 10^{-1}$             | $0.1496 \times 10^{-1}$             | -1.552         | 1     | $F_1$ | 1          | 2    | $F_2$ | 81        |
| 6026.861763                    | 6026.868626                    | -6.863                                                | $0.2388 \times 10^{-3}$             | $0.2043 \times 10^{-4}$             | 1068.818       | 4     | $F_2$ | 1          | 3    | $F_1$ | 122       |
| 6027.525037                    | 6027.520968                    | 4.069                                                 | $0.2904 \times 10^{-3}$             | $0.2072 \times 10^{-4}$             | 1301.429       | 4     | $E$   | 1          | 3    | $E$   | 78        |
| 6027.741100                    | 6027.726132                    | 14.968                                                |                                     | $0.4369 \times 10^{-4}$             |                | 5     | $F_2$ | 1          | 6    | $F_1$ | 191       |
| 6028.022948                    | 6028.013553                    | 9.395                                                 | $0.3890 \times 10^{-3}$             | $0.3079 \times 10^{-4}$             | 1163.554       | 4     | $F_1$ | 1          | 3    | $F_2$ | 115       |
| 6028.553895                    | 6028.541241                    | 12.654                                                | $0.6243 \times 10^{-3}$             | $0.5230 \times 10^{-4}$             | 1093.749       | 4     | $A_1$ | 1          | 3    | $A_2$ | 43        |
| 6029.556400                    | 6029.563915                    | -7.515                                                | $0.9551 \times 10^{-4}$             | $0.1636 \times 10^{-4}$             | 483.641        | 3     | $F_1$ | 1          | 2    | $F_2$ | 85        |
| 6029.655550                    | 6029.670131                    | -14.581                                               | $0.5345 \times 10^{-4}$             | $0.6231 \times 10^{-5}$             | 757.783        | 3     | $F_2$ | 1          | 2    | $F_1$ | 77        |
| 6030.032907                    | 6030.033537                    | -0.630                                                |                                     | $0.3455 \times 10^{-5}$             |                | 3     | $F_2$ | 1          | 2    | $F_1$ | 78        |
| 6030.130020                    | 6030.129660                    | 0.360                                                 | $0.2933 \times 10^{-4}$             | $0.2142 \times 10^{-4}$             | 36.919         | 12    | $F_1$ | 3          | 12   | $F_2$ | 392       |
| 6030.612830                    | 6030.613273                    | -0.443                                                |                                     | $0.1168 \times 10^{-4}$             |                | 12    | $F_1$ | 1          | 12   | $F_2$ | 392       |
| 6031.545600                    | 6031.575933                    | -30.333                                               | $0.7647 \times 10^{-4}$             | $0.5420 \times 10^{-4}$             | 41.088         | 10    | $A_1$ | 1          | 10   | $A_2$ | 107       |
| 6031.915468                    | 6031.952963                    | -37.495                                               | $0.3503 \times 10^{-4}$             | $0.3979 \times 10^{-4}$             | -11.966        | 13    | $F_2$ | 2          | 13   | $F_1$ | 427       |
| 6033.206000                    | 6033.220698                    | -14.698                                               |                                     | $0.3152 \times 10^{-4}$             |                | 12    | $F_1$ | 2          | 12   | $F_2$ | 393       |
| 6033.248540                    | 6033.254276                    | -5.736                                                |                                     | $0.4072 \times 10^{-4}$             |                | 12    | $E$   | 2          | 12   | $E$   | 262       |
| 6033.418010                    | 6033.425384                    | -7.374                                                | $0.3885 \times 10^{-4}$             | $0.3174 \times 10^{-4}$             | 22.406         | 9     | $F_1$ | 3          | 9    | $F_2$ | 292       |
| 6033.433000                    | 6033.442287                    | -9.287                                                |                                     | $0.2080 \times 10^{-4}$             |                | 9     | $F_2$ | 2          | 9    | $F_1$ | 300       |
| 6034.142825                    | 6034.157830                    | -15.005                                               | $0.2549 \times 10^{-3}$             | $0.1258 \times 10^{-7}$             | -100.000       | 2     | $E$   | 1          | 1    | $E$   | 31        |
| 6034.230422                    | 6034.236473                    | -6.051                                                |                                     | $0.1266 \times 10^{-5}$             |                | 2     | $E$   | 1          | 3    | $E$   | 70        |
| 6034.289573                    | 6034.298659                    | -9.086                                                | $0.4085 \times 10^{-3}$             | $0.1425 \times 10^{-7}$             | -100.000       | 2     | $F_2$ | 1          | 1    | $F_1$ | 53        |
| 6034.590000                    | 6034.598577                    | -8.577                                                |                                     | $0.3870 \times 10^{-5}$             |                | 3     | $F_2$ | 1          | 2    | $F_1$ | 79        |
| 6034.641800                    | 6034.629624                    | 12.176                                                | $0.4541 \times 10^{-4}$             | $0.4191 \times 10^{-4}$             | 8.360          | 11    | $E$   | 1          | 11   | $E$   | 239       |
| 6034.740473                    | 6034.727169                    | 13.304                                                | $0.1713 \times 10^{-3}$             | $0.1327 \times 10^{-3}$             | 29.109         | 11    | $F_1$ | 2          | 11   | $F_2$ | 358       |
| 6034.776546                    | 6034.764441                    | 12.105                                                | $0.8888 \times 10^{-3}$             | $0.3305 \times 10^{-4}$             | 2588.936       | 3     | $A_2$ | 1          | 2    | $A_1$ | 32        |
| 6035.024600                    | 6035.046495                    | -21.895                                               | $0.5169 \times 10^{-4}$             | $0.4970 \times 10^{-4}$             | 4.011          | 13    | $F_1$ | 3          | 13   | $F_2$ | 420       |
| 6035.695080                    | 6035.681690                    | 13.390                                                | $0.5575 \times 10^{-4}$             | $0.5031 \times 10^{-4}$             | 10.821         | 10    | $A_2$ | 1          | 10   | $A_1$ | 113       |
| 6035.746252                    | 6035.747283                    | -1.031                                                |                                     | $0.1603 \times 10^{-5}$             |                | 2     | $F_2$ | 1          | 3    | $F_1$ | 111       |
| 6035.902190                    | 6035.886573                    | 15.617                                                | $0.5700 \times 10^{-4}$             | $0.5173 \times 10^{-4}$             | 10.185         | 10    | $F_1$ | 2          | 10   | $F_2$ | 332       |
| 6035.976710                    | 6035.962053                    | 14.657                                                | $0.1118 \times 10^{-3}$             | $0.1088 \times 10^{-3}$             | 2.791          | 10    | $F_1$ | 1          | 10   | $F_2$ | 332       |
| 6036.070009                    | 6036.070446                    | -0.437                                                | $0.3398 \times 10^{-3}$             | $0.1318 \times 10^{-4}$             | 2478.049       | 3     | $F_2$ | 1          | 2    | $F_1$ | 80        |
| 6036.136442                    | 6036.120626                    | 15.816                                                |                                     | $0.3954 \times 10^{-3}$             |                | 10    | $A_1$ | 1          | 10   | $A_2$ | 108       |
| 6036.163268                    | 6036.174068                    | -10.800                                               | $0.1286 \times 10^{-3}$             | $0.1208 \times 10^{-3}$             | 6.489          | 13    | $F_1$ | 2          | 13   | $F_2$ | 421       |
| 6036.198830                    | 6036.205454                    | -6.624                                                | $0.2155 \times 10^{-3}$             | $0.2054 \times 10^{-3}$             | 4.903          | 13    | $A_1$ | 1          | 13   | $A_2$ | 144       |
| 6036.285000                    | 6036.282740                    | 2.260                                                 | $0.1274 \times 10^{-3}$             | $0.1175 \times 10^{-3}$             | 8.448          | 12    | $A_2$ | 1          | 12   | $A_1$ | 136       |
| 6036.344259                    | 6036.345377                    | -1.118                                                | $0.3907 \times 10^{-4}$             | $0.3278 \times 10^{-4}$             | 19.191         | 8     | $F_1$ | 2          | 8    | $F_2$ | 267       |
| 6036.413893                    | 6036.416436                    | -2.543                                                |                                     | $0.2824 \times 10^{-4}$             |                | 8     | $F_1$ | 1          | 8    | $F_2$ | 267       |
| 6036.547050                    | 6036.541297                    | 5.753                                                 |                                     | $0.1560 \times 10^{-4}$             |                | 3     | $F_1$ | 1          | 2    | $F_2$ | 88        |
| 6036.653600                    | 6036.654114                    | -0.514                                                | $0.1254 \times 10^{-1}$             | $0.1301 \times 10^{-1}$             | -3.612         | 2     | $E$   | 1          | 3    | $E$   | 71        |
| 6036.658400                    | 6036.657405                    | 0.995                                                 | $0.1931 \times 10^{-1}$             | $0.1951 \times 10^{-1}$             | -1.008         | 2     | $F_2$ | 1          | 3    | $F_1$ | 112       |
| 6036.694440                    | 6036.699216                    | -4.776                                                | $0.1488 \times 10^{-3}$             | $0.1532 \times 10^{-3}$             | -2.850         | 8     | $A_1$ | 1          | 8    | $A_2$ | 85        |
| 6036.774710                    | 6036.764852                    | 9.858                                                 | $0.3053 \times 10^{-4}$             | $0.2894 \times 10^{-4}$             | 5.497          | 9     | $F_2$ | 2          | 9    | $F_1$ | 302       |
| 6036.841110                    | 6036.832799                    | 8.311                                                 | $0.7965 \times 10^{-4}$             | $0.7073 \times 10^{-4}$             | 12.607         | 7     | $F_1$ | 2          | 7    | $F_2$ | 231       |
| 6036.921130                    | 6036.909567                    | 11.563                                                |                                     | $0.4348 \times 10^{-4}$             |                | 9     | $F_2$ | 1          | 9    | $F_1$ | 302       |
| 6036.974928                    | 6036.973895                    | 1.033                                                 |                                     | $0.3990 \times 10^{-4}$             |                | 11    | $F_1$ | 2          | 11   | $F_2$ | 359       |
| 6037.001701                    | 6037.001786                    | -0.085                                                | $0.1527 \times 10^{-3}$             | $0.1680 \times 10^{-3}$             | -9.120         | 12    | $F_2$ | 1          | 12   | $F_1$ | 390       |

Table II (continued).

| $\tilde{\nu}_e/\text{cm}^{-1}$ | $\tilde{\nu}_c/\text{cm}^{-1}$ | $\tilde{\nu}_e - \tilde{\nu}_c/10^{-3}\text{cm}^{-1}$ | $I_e/\text{cm}^{-2}\text{atm}^{-1}$ | $I_c/\text{cm}^{-2}\text{atm}^{-1}$ | $I_e - I_c/\%$ | $J''$ | $C''$ | $\alpha''$ | $J'$ | $C'$  | $\alpha'$ |
|--------------------------------|--------------------------------|-------------------------------------------------------|-------------------------------------|-------------------------------------|----------------|-------|-------|------------|------|-------|-----------|
| 6037.078100                    | 6037.081070                    |                                                       | -2.970                              | $0.5842 \times 10^{-4}$             |                | 11    | $F_2$ | 3          | 11   | $F_1$ | 364       |
| 6037.219000                    | 6037.221793                    |                                                       | -2.793                              | $0.2144 \times 10^{-4}$             |                | 11    | $F_2$ | 2          | 11   | $F_1$ | 364       |
| 6037.235980                    | 6037.228041                    |                                                       | 7.939                               | $0.8137 \times 10^{-4}$             |                | 9     | $F_1$ | 3          | 9    | $F_2$ | 294       |
| 6037.286406                    | 6037.277761                    |                                                       | 8.645                               | $0.1778 \times 10^{-3}$             | 7.867          | 9     | $F_1$ | 2          | 9    | $F_2$ | 294       |
| 6037.514000                    | 6037.514573                    |                                                       | -0.573                              | $0.9271 \times 10^{-5}$             |                | 5     | $E$   | 1          | 6    | $E$   | 132       |
| 6037.632200                    | 6037.629299                    |                                                       | 2.901                               | $0.4961 \times 10^{-4}$             | -1.585         | 7     | $E$   | 1          | 7    | $E$   | 155       |
| 6037.724273                    | 6037.721156                    |                                                       | 3.117                               | $0.1735 \times 10^{-4}$             |                | 7     | $F_1$ | 2          | 7    | $F_2$ | 232       |
| 6037.740720                    | 6037.740696                    |                                                       | 0.024                               | $0.4543 \times 10^{-3}$             | 10.898         | 11    | $A_2$ | 1          | 11   | $A_1$ | 116       |
| 6037.777662                    | 6037.776847                    |                                                       | 0.815                               | $0.3821 \times 10^{-4}$             | -8.844         | 7     | $F_1$ | 1          | 7    | $F_2$ | 232       |
| 6037.874560                    | 6037.866208                    |                                                       | 8.352                               | $0.2247 \times 10^{-3}$             | 9.865          | 11    | $F_2$ | 2          | 11   | $F_1$ | 365       |
| 6037.913230                    | 6037.902048                    |                                                       | 11.182                              | $0.2096 \times 10^{-3}$             | 47.407         | 11    | $E$   | 1          | 11   | $E$   | 240       |
| 6038.003450                    | 6038.003920                    |                                                       | -0.470                              | $0.4538 \times 10^{-4}$             | 7.980          | 10    | $E$   | 2          | 10   | $E$   | 221       |
| 6038.150435                    | 6038.150079                    |                                                       | 0.356                               | $0.8457 \times 10^{-4}$             | 6.906          | 8     | $E$   | 2          | 8    | $E$   | 179       |
| 6038.234937                    | 6038.262144                    |                                                       | -27.207                             | $0.5854 \times 10^{-3}$             | 4.483          | 12    | $A_1$ | 1          | 12   | $A_2$ | 128       |
| 6038.234937                    | 6038.264899                    |                                                       | -29.962                             | $0.3513 \times 10^{-3}$             | 4.813          | 12    | $F_1$ | 1          | 12   | $F_2$ | 396       |
| 6038.234937                    | 6038.266190                    |                                                       | -31.253                             | $0.2341 \times 10^{-3}$             | 4.862          | 12    | $E$   | 1          | 12   | $E$   | 264       |
| 6038.330388                    | 6038.318774                    |                                                       | 11.614                              | $0.1739 \times 10^{-3}$             | 13.906         | 6     | $A_1$ | 1          | 6    | $A_2$ | 66        |
| 6038.391474                    | 6038.392700                    |                                                       | -1.226                              | $0.1868 \times 10^{-4}$             | 2.356          | 8     | $F_2$ | 2          | 8    | $F_1$ | 263       |
| 6038.411693                    | 6038.402831                    |                                                       | 8.862                               | $0.5318 \times 10^{-4}$             | 8.585          | 6     | $F_1$ | 1          | 6    | $F_2$ | 206       |
| 6038.432345                    | 6038.433095                    |                                                       | -0.750                              | $0.3141 \times 10^{-3}$             | 8.532          | 8     | $F_2$ | 1          | 8    | $F_1$ | 263       |
| 6038.492283                    | 6038.486021                    |                                                       | 6.262                               | $0.1108 \times 10^{-4}$             |                | 6     | $E$   | 1          | 6    | $E$   | 136       |
| 6038.565415                    | 6038.562473                    |                                                       | 2.942                               | $0.2816 \times 10^{-3}$             | 6.158          | 10    | $F_2$ | 2          | 10   | $F_1$ | 325       |
| 6038.644944                    | 6038.634740                    |                                                       | 10.204                              | $0.5399 \times 10^{-4}$             | 6.650          | 10    | $F_1$ | 2          | 10   | $F_2$ | 334       |
| 6038.720670                    | 6038.710220                    |                                                       | 10.450                              | $0.2333 \times 10^{-3}$             | 10.121         | 10    | $F_1$ | 1          | 10   | $F_2$ | 334       |
| 6038.867480                    | 6038.874126                    |                                                       | -6.646                              | $0.3183 \times 10^{-4}$             |                | 9     | $F_2$ | 2          | 9    | $F_1$ | 303       |
| 6038.997000                    | 6038.987933                    |                                                       | 9.067                               | $0.1967 \times 10^{-4}$             |                | 6     | $F_2$ | 2          | 6    | $F_1$ | 198       |
| 6039.020700                    | 6039.009649                    |                                                       | 11.051                              | $0.2135 \times 10^{-4}$             |                | 6     | $F_2$ | 1          | 6    | $F_1$ | 198       |
| 6039.020161                    | 6039.023159                    |                                                       | -2.998                              | $0.5008 \times 10^{-3}$             | 6.207          | 11    | $F_1$ | 1          | 11   | $F_2$ | 360       |
| 6039.027731                    | 6039.028680                    |                                                       | -0.949                              | $0.4717 \times 10^{-3}$             | 0.469          | 11    | $F_2$ | 1          | 11   | $F_1$ | 366       |
| 6039.086601                    | 6039.094900                    |                                                       | -8.299                              | $0.4803 \times 10^{-4}$             |                | 7     | $F_1$ | 2          | 7    | $F_2$ | 233       |
| 6039.290145                    | 6039.291155                    |                                                       | -1.010                              | $0.1719 \times 10^{-3}$             | 0.618          | 9     | $E$   | 1          | 9    | $E$   | 198       |
| 6039.338480                    | 6039.335905                    |                                                       | 2.575                               | $0.5223 \times 10^{-4}$             | 3.263          | 9     | $F_1$ | 3          | 9    | $F_2$ | 295       |
| 6039.363494                    | 6039.371483                    |                                                       | -7.989                              | $0.1822 \times 10^{-3}$             | 13.530         | 7     | $F_2$ | 2          | 7    | $F_1$ | 238       |
| 6039.387190                    | 6039.385625                    |                                                       | 1.565                               | $0.2247 \times 10^{-3}$             | 7.809          | 9     | $F_1$ | 2          | 9    | $F_2$ | 295       |
| 6039.401181                    | 6039.409501                    |                                                       | -8.320                              | $0.9526 \times 10^{-4}$             |                | 7     | $F_2$ | 1          | 7    | $F_1$ | 238       |
| 6039.509617                    | 6039.502282                    |                                                       | 7.335                               | $0.5040 \times 10^{-3}$             | 7.319          | 9     | $A_1$ | 1          | 9    | $A_2$ | 102       |
| 6039.657966                    | 6039.665976                    |                                                       | -8.010                              | $0.8604 \times 10^{-3}$             | 9.175          | 7     | $A_2$ | 1          | 7    | $A_1$ | 74        |
| 6039.735000                    | 6039.724941                    |                                                       | 10.059                              | $0.4063 \times 10^{-3}$             |                | 10    | $E$   | 1          | 10   | $E$   | 222       |
| 6039.705701                    | 6039.729430                    |                                                       | -23.729                             | $0.2178 \times 10^{-5}$             |                | 2     | $E$   | 1          | 1    | $E$   | 32        |
| 6039.742000                    | 6039.730322                    |                                                       | 11.678                              | $0.6068 \times 10^{-3}$             |                | 10    | $F_2$ | 1          | 10   | $F_1$ | 326       |
| 6039.753000                    | 6039.740044                    |                                                       | 12.956                              | $0.1010 \times 10^{-2}$             |                | 10    | $A_2$ | 1          | 10   | $A_1$ | 114       |
| 6039.758300                    | 6039.745948                    |                                                       | 12.352                              | $0.5041 \times 10^{-4}$             |                | 5     | $F_1$ | 2          | 5    | $F_2$ | 168       |
| 6039.876860                    | 6039.867116                    |                                                       | 9.744                               | $0.1814 \times 10^{-4}$             | 10.480         | 5     | $F_2$ | 1          | 5    | $F_1$ | 176       |
| 6039.894560                    | 6039.907717                    |                                                       | -13.157                             | $0.1431 \times 10^{-5}$             |                | 2     | $F_2$ | 1          | 1    | $F_1$ | 54        |
| 6039.924400                    | 6039.937518                    |                                                       | -13.118                             | $0.5686 \times 10^{-4}$             |                | 6     | $F_1$ | 1          | 6    | $F_2$ | 207       |
| 6039.962952                    | 6039.969844                    |                                                       | -6.892                              | $0.2042 \times 10^{-4}$             |                | 8     | $F_2$ | 2          | 8    | $F_1$ | 264       |
| 6040.004120                    | 6040.010238                    |                                                       | -6.118                              | $0.1970 \times 10^{-3}$             | 21.269         | 8     | $F_2$ | 1          | 8    | $F_1$ | 264       |
| 6040.142780                    | 6040.145448                    |                                                       | -2.668                              | $0.2515 \times 10^{-3}$             | 8.042          | 8     | $F_1$ | 2          | 8    | $F_2$ | 269       |
| 6040.248407                    | 6040.260227                    |                                                       | -11.820                             | $0.1224 \times 10^{-3}$             | 26.202         | 6     | $E$   | 1          | 6    | $E$   | 137       |
| 6040.384314                    | 6040.370229                    |                                                       | 14.085                              | $0.7440 \times 10^{-3}$             | 3.689          | 9     | $F_1$ | 1          | 9    | $F_2$ | 296       |

Table II (continued).

| $\tilde{\nu}_e/\text{cm}^{-1}$ | $\tilde{\nu}_c/\text{cm}^{-1}$ | $\tilde{\nu}_e - \tilde{\nu}_c/10^{-3}\text{cm}^{-1}$ | $I_e/\text{cm}^{-2}\text{atm}^{-1}$ | $I_c/\text{cm}^{-2}\text{atm}^{-1}$ | $I_e - I_c/\%$ | $J''$ | $C''$ | $\alpha''$ | $J'$ | $C'$  | $\alpha'$ |
|--------------------------------|--------------------------------|-------------------------------------------------------|-------------------------------------|-------------------------------------|----------------|-------|-------|------------|------|-------|-----------|
| 6040.405451                    | 6040.388788                    | 16.663                                                | $0.7454 \times 10^{-3}$             | $0.7149 \times 10^{-3}$             | 4.262          | 9     | $F_2$ | 1          | 9    | $F_1$ | 304       |
| 6040.504788                    | 6040.517724                    | -12.936                                               | $0.2441 \times 10^{-3}$             | $0.2165 \times 10^{-3}$             | 12.756         | 6     | $F_2$ | 2          | 6    | $F_1$ | 199       |
| 6040.526456                    | 6040.539441                    | -12.985                                               | $0.1575 \times 10^{-3}$             | $0.1428 \times 10^{-3}$             | 10.315         | 6     | $F_2$ | 1          | 6    | $F_1$ | 199       |
| 6040.742610                    | 6040.752649                    | -10.039                                               | $0.1178 \times 10^{-3}$             | $0.1113 \times 10^{-3}$             | 5.826          | 7     | $F_2$ | 2          | 7    | $F_1$ | 239       |
| 6040.780000                    | 6040.790668                    | -10.668                                               |                                     | $0.1389 \times 10^{-4}$             |                | 7     | $F_2$ | 1          | 7    | $F_1$ | 239       |
| 6040.826070                    | 6040.833899                    | -7.829                                                | $0.1276 \times 10^{-3}$             | $0.1141 \times 10^{-3}$             | 11.864         | 7     | $E$   | 1          | 7    | $E$   | 156       |
| 6040.855770                    | 6040.869523                    | -13.753                                               | $0.2818 \times 10^{-4}$             | $0.2775 \times 10^{-4}$             | 1.533          | 5     | $F_2$ | 1          | 5    | $F_1$ | 177       |
| 6040.947928                    | 6040.939086                    | 8.842                                                 | $0.1394 \times 10^{-2}$             | $0.1314 \times 10^{-2}$             | 6.053          | 8     | $A_1$ | 1          | 8    | $A_2$ | 86        |
| 6040.989537                    | 6040.977410                    | 12.127                                                | $0.8080 \times 10^{-3}$             | $0.7563 \times 10^{-3}$             | 6.833          | 8     | $F_1$ | 1          | 8    | $F_2$ | 270       |
| 6041.006166                    | 6040.992890                    | 13.276                                                | $0.5255 \times 10^{-3}$             | $0.5049 \times 10^{-3}$             | 4.075          | 8     | $E$   | 1          | 8    | $E$   | 180       |
| 6041.042650                    | 6041.027375                    | 15.275                                                |                                     | $0.1398 \times 10^{-4}$             |                | 4     | $F_2$ | 1          | 4    | $F_1$ | 137       |
| 6041.127330                    | 6041.140795                    | -13.465                                               | $0.1184 \times 10^{-3}$             | $0.1137 \times 10^{-3}$             | 4.146          | 5     | $E$   | 1          | 5    | $E$   | 114       |
| 6041.409000                    | 6041.422700                    | -13.700                                               |                                     | $0.4244 \times 10^{-4}$             |                | 5     | $F_1$ | 2          | 5    | $F_2$ | 169       |
| 6041.422978                    | 6041.437280                    | -14.302                                               | $0.2693 \times 10^{-3}$             | $0.2301 \times 10^{-3}$             | 17.039         | 5     | $F_1$ | 1          | 5    | $F_2$ | 169       |
| 6041.468888                    | 6041.479228                    | -10.340                                               | $0.7599 \times 10^{-4}$             | $0.7055 \times 10^{-4}$             | 7.707          | 6     | $F_1$ | 1          | 6    | $F_2$ | 208       |
| 6041.496613                    | 6041.493060                    | 3.553                                                 | $0.7753 \times 10^{-3}$             | $0.7424 \times 10^{-3}$             | 4.427          | 7     | $F_1$ | 1          | 7    | $F_2$ | 234       |
| 6041.518860                    | 6041.513394                    | 5.466                                                 |                                     | $0.3587 \times 10^{-4}$             |                | 7     | $F_2$ | 2          | 7    | $F_1$ | 240       |
| 6041.557837                    | 6041.551412                    | 6.425                                                 | $0.7273 \times 10^{-3}$             | $0.6972 \times 10^{-3}$             | 4.319          | 7     | $F_2$ | 1          | 7    | $F_1$ | 240       |
| 6041.765000                    | 6041.807308                    | -42.308                                               |                                     | $0.2723 \times 10^{-4}$             |                | 6     | $F_1$ | 1          | 7    | $F_2$ | 223       |
| 6041.817830                    | 6041.823833                    | -6.003                                                | $0.5000 \times 10^{-4}$             | $0.4667 \times 10^{-4}$             | 7.144          | 4     | $F_2$ | 1          | 4    | $F_1$ | 138       |
| 6041.973947                    | 6041.977214                    | -3.267                                                | $0.4081 \times 10^{-3}$             | $0.4063 \times 10^{-3}$             | 0.435          | 6     | $E$   | 1          | 6    | $E$   | 138       |
| 6042.023037                    | 6042.025157                    | -2.120                                                | $0.5994 \times 10^{-3}$             | $0.5710 \times 10^{-3}$             | 4.971          | 6     | $F_2$ | 1          | 6    | $F_1$ | 200       |
| 6042.091111                    | 6042.091577                    | -0.466                                                | $0.1182 \times 10^{-2}$             | $0.1034 \times 10^{-2}$             | 14.284         | 6     | $A_2$ | 1          | 6    | $A_1$ | 72        |
| 6042.168000                    | 6042.161582                    | 6.418                                                 | $0.4215 \times 10^{-4}$             | $0.3951 \times 10^{-4}$             | 6.682          | 6     | $F_2$ | 2          | 7    | $F_1$ | 228       |
| 6042.187221                    | 6042.183299                    | 3.922                                                 |                                     | $0.1774 \times 10^{-4}$             |                | 6     | $F_2$ | 1          | 7    | $F_1$ | 228       |
| 6042.386867                    | 6042.383146                    | 3.721                                                 | $0.3787 \times 10^{-4}$             | $0.3365 \times 10^{-4}$             | 12.529         | 3     | $F_2$ | 1          | 3    | $F_1$ | 113       |
| 6042.415355                    | 6042.422556                    | -7.201                                                | $0.3814 \times 10^{-3}$             | $0.3741 \times 10^{-3}$             | 1.953          | 5     | $F_1$ | 1          | 5    | $F_2$ | 170       |
| 6042.439134                    | 6042.449032                    | -9.898                                                | $0.7457 \times 10^{-3}$             | $0.7423 \times 10^{-3}$             | 0.453          | 4     | $A_1$ | 1          | 4    | $A_2$ | 44        |
| 6042.517056                    | 6042.522290                    | -5.234                                                | $0.4389 \times 10^{-3}$             | $0.4357 \times 10^{-3}$             | 0.731          | 5     | $F_2$ | 1          | 5    | $F_1$ | 178       |
| 6042.855689                    | 6042.796547                    | 59.142                                                |                                     | $0.1274 \times 10^{-3}$             |                | 6     | $A_2$ | 1          | 7    | $A_1$ | 71        |
| 6042.881821                    | 6042.886375                    | -4.554                                                | $0.1969 \times 10^{-3}$             | $0.2057 \times 10^{-3}$             | -4.266         | 4     | $F_1$ | 1          | 4    | $F_2$ | 144       |
| 6042.935493                    | 6042.935315                    | 0.178                                                 |                                     | $0.1964 \times 10^{-3}$             |                | 3     | $F_1$ | 1          | 3    | $F_2$ | 108       |
| 6043.233250                    | 6043.220491                    | 12.759                                                | $0.4572 \times 10^{-4}$             | $0.4905 \times 10^{-4}$             | -6.786         | 2     | $E$   | 1          | 2    | $E$   | 54        |
| 6043.304090                    | 6043.302208                    | 1.882                                                 | $0.7476 \times 10^{-4}$             | $0.7781 \times 10^{-4}$             | -3.914         | 3     | $F_2$ | 1          | 3    | $F_1$ | 114       |
| 6043.429080                    | 6043.417369                    | 11.711                                                | $0.3493 \times 10^{-4}$             | $0.3655 \times 10^{-4}$             | -4.430         | 2     | $F_2$ | 1          | 2    | $F_1$ | 74        |
| 6043.573000                    | 6043.547741                    | 25.259                                                | $0.6813 \times 10^{-5}$             | $0.8044 \times 10^{-5}$             | -15.300        | 1     | $F_1$ | 1          | 1    | $F_2$ | 44        |
| 6044.122840                    | 6044.127394                    | -4.554                                                | $0.1524 \times 10^{-3}$             | $0.2986 \times 10^{-6}$             | 50930.142      | 1     | $F_1$ | 1          | 0    | $F_2$ | 19        |
| 6045.106078                    | 6045.102811                    | 3.267                                                 | $0.3591 \times 10^{-3}$             | $0.4835 \times 10^{-5}$             | 7326.877       | 2     | $F_2$ | 1          | 1    | $F_1$ | 55        |
| 6045.559041                    | 6045.559165                    | -0.124                                                | $0.2366 \times 10^{-3}$             | $0.3077 \times 10^{-5}$             | 7590.113       | 2     | $E$   | 1          | 1    | $E$   | 33        |
| 6045.740190                    | 6045.742427                    | -2.237                                                |                                     | $0.5239 \times 10^{-5}$             |                | 3     | $F_2$ | 1          | 4    | $F_1$ | 135       |
| 6046.942770                    | 6046.946565                    | -3.795                                                | $0.2153 \times 10^{-1}$             | $0.2219 \times 10^{-1}$             | -2.993         | 3     | $F_1$ | 1          | 4    | $F_2$ | 142       |
| 6046.952120                    | 6046.955168                    | -3.048                                                | $0.2153 \times 10^{-1}$             | $0.2217 \times 10^{-1}$             | -2.892         | 3     | $F_2$ | 1          | 4    | $F_1$ | 136       |
| 6046.964700                    | 6046.965367                    | -0.667                                                | $0.3582 \times 10^{-1}$             | $0.3691 \times 10^{-1}$             | -2.966         | 3     | $A_2$ | 1          | 4    | $A_1$ | 51        |
| 6051.617910                    | 6051.652317                    | -34.407                                               | $0.8342 \times 10^{-4}$             | $0.8404 \times 10^{-4}$             | -0.738         | 6     | $A_1$ | 1          | 7    | $A_2$ | 79        |
| 6052.056480                    | 6052.052423                    | 4.057                                                 | $0.4443 \times 10^{-4}$             | $0.3326 \times 10^{-4}$             | 33.578         | 6     | $F_1$ | 1          | 7    | $F_2$ | 225       |
| 6052.267000                    | 6052.253233                    | 13.767                                                | $0.3173 \times 10^{-4}$             | $0.2977 \times 10^{-4}$             | 6.582          | 6     | $F_2$ | 2          | 7    | $F_1$ | 230       |
| 6053.355896                    | 6053.370175                    | -14.279                                               |                                     | $0.6496 \times 10^{-5}$             |                | 4     | $F_1$ | 1          | 5    | $F_2$ | 164       |
| 6053.379455                    | 6053.397575                    | -18.120                                               |                                     | $0.2028 \times 10^{-4}$             |                | 4     | $A_1$ | 1          | 5    | $A_2$ | 58        |
| 6053.738957                    | 6053.737763                    | 1.194                                                 |                                     | $0.3616 \times 10^{-6}$             |                | 4     | $F_1$ | 1          | 4    | $F_2$ | 145       |
| 6053.773364                    | 6053.773674                    | -0.310                                                |                                     | $0.1130 \times 10^{-5}$             |                | 6     | $F_1$ | 1          | 6    | $F_2$ | 209       |

Table II (continued).

| $\tilde{\nu}_e/\text{cm}^{-1}$ | $\tilde{\nu}_c/\text{cm}^{-1}$ | $\tilde{\nu}_e - \tilde{\nu}_c/10^{-3}\text{cm}^{-1}$ | $I_e/\text{cm}^{-2}\text{atm}^{-1}$ | $I_c/\text{cm}^{-2}\text{atm}^{-1}$ | $I_e - I_c/\%$ | $J''$ | $C''$ | $\alpha''$ | $J'$ | $C'$  | $\alpha'$ |
|--------------------------------|--------------------------------|-------------------------------------------------------|-------------------------------------|-------------------------------------|----------------|-------|-------|------------|------|-------|-----------|
| 6053.818592                    | 6053.810166                    | 8.426                                                 |                                     | $0.3035 \times 10^{-6}$             |                | 3     | $F_2$ | 1          | 3    | $F_1$ | 115       |
| 6053.913770                    | 6053.914643                    | -0.873                                                | $0.2120 \times 10^{-4}$             | $0.3304 \times 10^{-5}$             | 541.589        | 6     | $F_2$ | 2          | 6    | $F_1$ | 201       |
| 6053.929852                    | 6053.927556                    | 2.296                                                 |                                     | $0.1328 \times 10^{-5}$             |                | 4     | $F_2$ | 1          | 4    | $F_1$ | 139       |
| 6053.938390                    | 6053.939273                    | -0.883                                                |                                     | $0.1944 \times 10^{-5}$             |                | 5     | $E$   | 1          | 5    | $E$   | 115       |
| 6053.946000                    | 6053.945230                    | 0.770                                                 |                                     | $0.9191 \times 10^{-5}$             |                | 7     | $A_2$ | 1          | 7    | $A_1$ | 75        |
| 6054.432502                    | 6054.428607                    | 3.895                                                 | $0.4878 \times 10^{-3}$             | $0.6271 \times 10^{-5}$             | 7678.128       | 1     | $F_1$ | 1          | 1    | $F_2$ | 45        |
| 6054.817710                    | 6054.819411                    | -1.701                                                | $0.6757 \times 10^{-3}$             | $0.1303 \times 10^{-4}$             | 5086.492       | 2     | $F_2$ | 1          | 2    | $F_1$ | 75        |
| 6055.070355                    | 6055.061827                    | 8.528                                                 | $0.4912 \times 10^{-3}$             | $0.9316 \times 10^{-5}$             | 5172.715       | 2     | $E$   | 1          | 2    | $E$   | 55        |
| 6055.085031                    | 6055.097761                    | -12.730                                               | $0.1221 \times 10^{-2}$             | $0.3867 \times 10^{-4}$             | 3057.298       | 3     | $A_2$ | 1          | 3    | $A_1$ | 33        |
| 6055.452946                    | 6055.464635                    | -11.689                                               | $0.1018 \times 10^{-4}$             | $0.1925 \times 10^{-5}$             | 428.719        | 6     | $F_1$ | 1          | 6    | $F_2$ | 210       |
| 6055.527942                    | 6055.531268                    | -3.326                                                | $0.7293 \times 10^{-3}$             | $0.2342 \times 10^{-4}$             | 3013.465       | 3     | $F_2$ | 1          | 3    | $F_1$ | 116       |
| 6055.616000                    | 6055.622009                    | -6.009                                                | $0.1776 \times 10^{-4}$             | $0.1007 \times 10^{-4}$             | 76.298         | 4     | $E$   | 1          | 5    | $E$   | 112       |
| 6055.802000                    | 6055.808666                    | -6.666                                                | $0.4893 \times 10^{-5}$             | $0.2206 \times 10^{-5}$             | 121.783        | 7     | $F_2$ | 2          | 7    | $F_1$ | 242       |
| 6055.899156                    | 6055.895416                    | 3.740                                                 | $0.7647 \times 10^{-3}$             | $0.2322 \times 10^{-4}$             | 3193.020       | 3     | $F_1$ | 1          | 3    | $F_2$ | 109       |
| 6056.001932                    | 6056.012778                    | -10.846                                               | $0.6529 \times 10^{-3}$             | $0.3616 \times 10^{-4}$             | 1705.454       | 4     | $F_2$ | 1          | 4    | $F_1$ | 140       |
| 6056.024602                    | 6056.038457                    | -13.855                                               |                                     | $0.5043 \times 10^{-6}$             |                | 2     | $F_2$ | 1          | 2    | $F_1$ | 76        |
| 6056.125000                    | 6056.135714                    | -10.714                                               |                                     | $0.4730 \times 10^{-5}$             |                | 7     | $F_1$ | 2          | 7    | $F_2$ | 235       |
| 6056.465778                    | 6056.469138                    | -3.360                                                | $0.4340 \times 10^{-3}$             | $0.2402 \times 10^{-4}$             | 1706.942       | 4     | $E$   | 1          | 4    | $E$   | 97        |
| 6056.784463                    | 6056.794005                    | -9.542                                                | $0.1236 \times 10^{-3}$             | $0.2845 \times 10^{-5}$             | 4243.851       | 3     | $F_1$ | 1          | 3    | $F_2$ | 110       |
| 6056.813680                    | 6056.810492                    | 3.188                                                 | $0.5866 \times 10^{-3}$             | $0.3084 \times 10^{-4}$             | 1802.288       | 4     | $F_1$ | 1          | 4    | $F_2$ | 146       |
| 6056.840288                    | 6056.847870                    | -7.582                                                | $0.5248 \times 10^{-3}$             | $0.5224 \times 10^{-4}$             | 904.677        | 5     | $F_1$ | 2          | 5    | $F_2$ | 172       |
| 6057.080270                    | 6057.088425                    | -8.155                                                | $0.3750 \times 10^{-1}$             | $0.3802 \times 10^{-1}$             | -1.363         | 4     | $A_1$ | 1          | 5    | $A_2$ | 59        |
| 6057.092690                    | 6057.100460                    | -7.770                                                | $0.2258 \times 10^{-1}$             | $0.2277 \times 10^{-1}$             | -0.855         | 4     | $F_1$ | 1          | 5    | $F_2$ | 167       |
| 6057.100560                    | 6057.108965                    | -8.405                                                | $0.1515 \times 10^{-1}$             | $0.1517 \times 10^{-1}$             | -0.113         | 4     | $E$   | 1          | 5    | $E$   | 113       |
| 6057.126490                    | 6057.131010                    | -4.520                                                | $0.2270 \times 10^{-1}$             | $0.2270 \times 10^{-1}$             | -0.004         | 4     | $F_2$ | 1          | 5    | $F_1$ | 175       |
| 6057.232198                    | 6057.233086                    | -0.888                                                |                                     | $0.3109 \times 10^{-4}$             |                | 5     | $E$   | 1          | 5    | $E$   | 116       |
| 6057.526214                    | 6057.517789                    | 8.425                                                 | $0.1502 \times 10^{-2}$             | $0.6660 \times 10^{-4}$             | 2155.112       | 4     | $A_1$ | 1          | 4    | $A_2$ | 45        |
| 6057.532708                    | 6057.531071                    | 1.637                                                 |                                     | $0.1191 \times 10^{-3}$             |                | 6     | $A_1$ | 1          | 6    | $A_2$ | 67        |
| 6057.642736                    | 6057.631509                    | 11.227                                                | $0.4418 \times 10^{-3}$             | $0.4186 \times 10^{-4}$             | 955.322        | 5     | $F_2$ | 1          | 5    | $F_1$ | 180       |
| 6057.744817                    | 6057.747516                    | -2.699                                                | $0.1359 \times 10^{-3}$             | $0.6232 \times 10^{-5}$             | 2080.828       | 4     | $F_1$ | 1          | 4    | $F_2$ | 147       |
| 6057.806822                    | 6057.817792                    | -10.970                                               |                                     | $0.3291 \times 10^{-6}$             |                | 4     | $F_2$ | 1          | 4    | $F_1$ | 141       |
| 6057.971813                    | 6057.965133                    | 6.680                                                 | $0.3476 \times 10^{-3}$             | $0.6305 \times 10^{-4}$             | 451.346        | 6     | $F_1$ | 1          | 6    | $F_2$ | 211       |
| 6058.325851                    | 6058.311770                    | 14.081                                                | $0.2811 \times 10^{-3}$             | $0.4904 \times 10^{-4}$             | 473.148        | 6     | $F_2$ | 2          | 6    | $F_1$ | 202       |
| 6058.347846                    | 6058.333486                    | 14.360                                                |                                     | $0.8196 \times 10^{-5}$             |                | 6     | $F_2$ | 1          | 6    | $F_1$ | 202       |
| 6058.514000                    | 6058.514769                    | -0.769                                                |                                     | $0.4998 \times 10^{-5}$             |                | 4     | $F_1$ | 1          | 4    | $F_2$ | 148       |
| 6058.527000                    | 6058.527348                    | -0.348                                                | $0.7339 \times 10^{-4}$             | $0.5325 \times 10^{-5}$             | 1278.188       | 4     | $E$   | 1          | 4    | $E$   | 98        |
| 6058.658145                    | 6058.633181                    | 24.964                                                | $0.5274 \times 10^{-3}$             | $0.8281 \times 10^{-4}$             | 536.868        | 6     | $A_2$ | 1          | 6    | $A_1$ | 73        |
| 6058.759867                    | 6058.742220                    | 17.647                                                | $0.2143 \times 10^{-3}$             | $0.7443 \times 10^{-4}$             | 187.931        | 7     | $F_1$ | 2          | 7    | $F_2$ | 236       |
| 6058.810218                    | 6058.813780                    | -3.562                                                | $0.6647 \times 10^{-3}$             | $0.4069 \times 10^{-4}$             | 1533.559       | 5     | $F_1$ | 1          | 5    | $F_2$ | 173       |
| 6058.897004                    | 6058.892937                    | 4.067                                                 | $0.3809 \times 10^{-4}$             | $0.2866 \times 10^{-5}$             | 1228.915       | 5     | $E$   | 1          | 5    | $E$   | 117       |
| 6059.396760                    | 6059.374212                    | 22.548                                                | $0.1597 \times 10^{-3}$             | $0.5035 \times 10^{-4}$             | 217.204        | 7     | $F_2$ | 2          | 7    | $F_1$ | 243       |
| 6059.434770                    | 6059.412230                    | 22.540                                                | $0.5098 \times 10^{-4}$             | $0.1316 \times 10^{-4}$             | 287.360        | 7     | $F_2$ | 1          | 7    | $F_1$ | 243       |
| 6059.751090                    | 6059.728366                    | 22.724                                                | $0.1235 \times 10^{-3}$             | $0.7957 \times 10^{-4}$             | 55.214         | 8     | $F_2$ | 2          | 8    | $F_1$ | 267       |
| 6060.082110                    | 6060.079949                    | 2.161                                                 |                                     | $0.1271 \times 10^{-4}$             |                | 5     | $F_1$ | 1          | 5    | $F_2$ | 174       |
| 6060.128140                    | 6060.123659                    | 4.481                                                 | $0.1769 \times 10^{-3}$             | $0.2165 \times 10^{-4}$             | 717.217        | 5     | $F_2$ | 1          | 5    | $F_1$ | 182       |
| 6060.203703                    | 6060.210853                    | -7.150                                                | $0.1398 \times 10^{-3}$             | $0.1321 \times 10^{-4}$             | 958.689        | 6     | $F_2$ | 2          | 6    | $F_1$ | 203       |
| 6060.225871                    | 6060.232569                    | -6.698                                                | $0.3009 \times 10^{-3}$             | $0.1939 \times 10^{-4}$             | 1451.750       | 6     | $F_2$ | 1          | 6    | $F_1$ | 203       |
| 6060.269274                    | 6060.269032                    | 0.242                                                 | $0.3180 \times 10^{-3}$             | $0.2093 \times 10^{-4}$             | 1419.031       | 6     | $E$   | 1          | 6    | $E$   | 140       |
| 6060.317217                    | 6060.306677                    | 10.540                                                |                                     | $0.8676 \times 10^{-5}$             |                | 6     | $F_2$ | 1          | 6    | $F_1$ | 204       |
| 6060.324181                    | 6060.314275                    | 9.906                                                 | $0.1174 \times 10^{-3}$             | $0.6515 \times 10^{-4}$             | 80.208         | 8     | $F_1$ | 2          | 8    | $F_2$ | 273       |

Table II (continued).

| $\tilde{\nu}_e/\text{cm}^{-1}$ | $\tilde{\nu}_c/\text{cm}^{-1}$ | $\tilde{\nu}_e - \tilde{\nu}_c/10^{-3}\text{cm}^{-1}$ | $I_e/\text{cm}^{-2}\text{atm}^{-1}$ | $I_c/\text{cm}^{-2}\text{atm}^{-1}$ | $I_e - I_c/\%$ | $J''$ | $C''$ | $\alpha''$ | $J'$ | $C'$  | $\alpha'$ |
|--------------------------------|--------------------------------|-------------------------------------------------------|-------------------------------------|-------------------------------------|----------------|-------|-------|------------|------|-------|-----------|
| 6060.561320                    | 6060.550500                    | 10.820                                                | $0.1115 \times 10^{-3}$             | $0.1358 \times 10^{-3}$             | -17.916        | 9     | $A_2$ | 1          | 9    | $A_1$ | 97        |
| 6060.763070                    | 6060.792352                    | -29.282                                               | $0.1348 \times 10^{-4}$             | $0.4974 \times 10^{-6}$             | 2610.123       | 1     | $F_1$ | 1          | 1    | $F_2$ | 46        |
| 6060.894870                    | 6060.897135                    | -2.265                                                | $0.6456 \times 10^{-4}$             | $0.6878 \times 10^{-4}$             | -6.129         | 9     | $F_2$ | 2          | 9    | $F_1$ | 307       |
| 6061.041850                    | 6061.041851                    | -0.001                                                |                                     | $0.3782 \times 10^{-5}$             |                | 9     | $F_2$ | 1          | 9    | $F_1$ | 307       |
| 6061.090160                    | 6061.104577                    | -14.417                                               | $0.9597 \times 10^{-4}$             | $0.2496 \times 10^{-5}$             | 3744.974       | 2     | $F_2$ | 1          | 2    | $F_1$ | 77        |
| 6061.146100                    | 6061.156729                    | -10.629                                               | $0.5729 \times 10^{-4}$             | $0.5877 \times 10^{-4}$             | -2.521         | 9     | $F_1$ | 3          | 9    | $F_2$ | 299       |
| 6061.195850                    | 6061.206449                    | -10.599                                               |                                     | $0.7776 \times 10^{-5}$             |                | 9     | $F_1$ | 2          | 9    | $F_2$ | 299       |
| 6061.241770                    | 6061.244295                    | -2.525                                                | $0.4144 \times 10^{-4}$             | $0.2058 \times 10^{-5}$             | 1913.396       | 2     | $E$   | 1          | 2    | $E$   | 56        |
| 6061.369570                    | 6061.390382                    | -20.812                                               | $0.1065 \times 10^{-3}$             | $0.1123 \times 10^{-3}$             | -5.161         | 9     | $A_1$ | 1          | 9    | $A_2$ | 104       |
| 6061.458680                    | 6061.451778                    | 6.902                                                 | $0.5610 \times 10^{-4}$             | $0.2478 \times 10^{-5}$             | 2163.654       | 3     | $F_1$ | 1          | 3    | $F_2$ | 111       |
| 6061.462323                    | 6061.467983                    | -5.660                                                |                                     | $0.7256 \times 10^{-6}$             |                | 2     | $F_2$ | 1          | 2    | $F_1$ | 78        |
| 6061.672147                    | 6061.672758                    | -0.611                                                |                                     | $0.3902 \times 10^{-5}$             |                | 7     | $F_1$ | 1          | 7    | $F_2$ | 237       |
| 6061.711830                    | 6061.703977                    | 7.853                                                 | $0.2363 \times 10^{-3}$             | $0.8158 \times 10^{-5}$             | 2796.685       | 3     | $F_2$ | 1          | 3    | $F_1$ | 118       |
| 6061.740416                    | 6061.745881                    | -5.465                                                | $0.7802 \times 10^{-4}$             | $0.1458 \times 10^{-4}$             | 435.257        | 7     | $F_2$ | 2          | 7    | $F_1$ | 244       |
| 6061.781126                    | 6061.778165                    | 2.961                                                 |                                     | $0.1036 \times 10^{-4}$             |                | 7     | $F_1$ | 1          | 7    | $F_2$ | 238       |
| 6061.879692                    | 6061.878035                    | 1.657                                                 |                                     | $0.1564 \times 10^{-4}$             |                | 3     | $A_2$ | 1          | 3    | $A_1$ | 34        |
| 6061.912784                    | 6061.926067                    | -13.283                                               | $0.6483 \times 10^{-3}$             | $0.7591 \times 10^{-4}$             | 754.092        | 7     | $A_2$ | 1          | 7    | $A_1$ | 76        |
| 6061.979420                    | 6061.987072                    | -7.652                                                |                                     | $0.3583 \times 10^{-5}$             |                | 3     | $F_1$ | 1          | 3    | $F_2$ | 112       |
| 6062.050052                    | 6062.046914                    | 3.138                                                 |                                     | $0.3445 \times 10^{-4}$             |                | 6     | $F_2$ | 1          | 6    | $F_1$ | 205       |
| 6062.082000                    | 6062.089347                    | -7.347                                                |                                     | $0.1918 \times 10^{-5}$             |                | 3     | $F_1$ | 1          | 3    | $F_2$ | 113       |
| 6062.133000                    | 6062.140421                    | -7.421                                                | $0.1957 \times 10^{-4}$             | $0.3795 \times 10^{-7}$             | 51463.114      | 3     | $F_2$ | 1          | 3    | $F_1$ | 119       |
| 6062.243980                    | 6062.237633                    | 6.347                                                 |                                     | $0.1458 \times 10^{-5}$             |                | 4     | $F_2$ | 1          | 4    | $F_1$ | 142       |
| 6062.582408                    | 6062.567668                    | 14.740                                                | $0.1772 \times 10^{-3}$             | $0.1139 \times 10^{-4}$             | 1455.120       | 4     | $F_1$ | 1          | 4    | $F_2$ | 150       |
| 6062.658349                    | 6062.666286                    | -7.937                                                |                                     | $0.3208 \times 10^{-5}$             |                | 5     | $F_2$ | 1          | 6    | $F_1$ | 194       |
| 6062.638093                    | 6062.683412                    | -45.319                                               |                                     | $0.2685 \times 10^{-4}$             |                | 4     | $A_1$ | 1          | 4    | $A_2$ | 46        |
| 6062.824980                    | 6062.852583                    | -27.603                                               | $0.6664 \times 10^{-3}$             | $0.7915 \times 10^{-6}$             | 84099.072      | 8     | $A_1$ | 1          | 8    | $A_2$ | 87        |
| 6062.856236                    | 6062.886246                    | -30.010                                               | $0.3711 \times 10^{-3}$             | $0.2080 \times 10^{-6}$             | 178349.447     | 8     | $F_1$ | 1          | 8    | $F_2$ | 274       |
| 6062.873380                    | 6062.904017                    | -30.637                                               | $0.2476 \times 10^{-3}$             | $0.5788 \times 10^{-7}$             | 427686.248     | 8     | $E$   | 1          | 8    | $E$   | 183       |
| 6063.022850                    | 6063.039329                    | -16.479                                               |                                     | $0.3917 \times 10^{-7}$             |                | 4     | $E$   | 1          | 4    | $E$   | 100       |
| 6063.082770                    | 6063.067994                    | 14.776                                                |                                     | $0.1002 \times 10^{-4}$             |                | 5     | $F_2$ | 1          | 5    | $F_1$ | 184       |
| 6063.067900                    | 6063.079991                    | -12.091                                               |                                     | $0.1443 \times 10^{-5}$             |                | 4     | $F_2$ | 1          | 4    | $F_1$ | 144       |
| 6063.154494                    | 6063.139578                    | 14.916                                                |                                     | $0.4437 \times 10^{-5}$             |                | 5     | $F_1$ | 2          | 5    | $F_2$ | 175       |
| 6063.169711                    | 6063.154158                    | 15.553                                                | $0.1888 \times 10^{-3}$             | $0.1738 \times 10^{-4}$             | 986.014        | 5     | $F_1$ | 1          | 5    | $F_2$ | 175       |
| 6063.390860                    | 6063.377475                    | 13.385                                                |                                     | $0.1085 \times 10^{-4}$             |                | 6     | $A_2$ | 1          | 6    | $A_1$ | 75        |
| 6063.460785                    | 6063.455655                    | 5.130                                                 |                                     | $0.7745 \times 10^{-6}$             |                | 4     | $F_2$ | 1          | 4    | $F_1$ | 145       |
| 6063.485898                    | 6063.491085                    | -5.187                                                | $0.2537 \times 10^{-3}$             | $0.1058 \times 10^{-4}$             | 2297.658       | 6     | $F_2$ | 1          | 6    | $F_1$ | 206       |
| 6063.532751                    | 6063.552373                    | -19.622                                               | $0.3100 \times 10^{-4}$             | $0.1583 \times 10^{-6}$             | 19478.501      | 6     | $F_1$ | 1          | 6    | $F_2$ | 214       |
| 6063.614560                    | 6063.582856                    | 31.704                                                |                                     | $0.1575 \times 10^{-4}$             |                | 5     | $E$   | 1          | 5    | $E$   | 119       |
| 6063.756874                    | 6063.741751                    | 15.123                                                | $0.2843 \times 10^{-3}$             | $0.2643 \times 10^{-4}$             | 975.593        | 8     | $F_2$ | 1          | 8    | $F_1$ | 269       |
| 6064.000930                    | 6063.983667                    | 17.263                                                |                                     | $0.2372 \times 10^{-4}$             |                | 1     | $F_1$ | 1          | 2    | $F_2$ | 82        |
| 6064.324974                    | 6064.313049                    | 11.925                                                |                                     | $0.3947 \times 10^{-4}$             |                | 6     | $A_1$ | 1          | 6    | $A_2$ | 68        |
| 6064.375696                    | 6064.370340                    | 5.356                                                 | $0.9746 \times 10^{-3}$             | $0.2406 \times 10^{-4}$             | 3950.045       | 0     | $A_1$ | 1          | 1    | $A_2$ | 19        |
| 6064.570242                    | 6064.533491                    | 36.751                                                | $0.3026 \times 10^{-3}$             | $0.2959 \times 10^{-4}$             | 922.767        | 6     | $F_2$ | 2          | 6    | $F_1$ | 208       |
| 6064.730547                    | 6064.711811                    | 18.736                                                |                                     | $0.2347 \times 10^{-6}$             |                | 5     | $F_2$ | 1          | 5    | $F_1$ | 186       |
| 6064.788610                    | 6064.812205                    | -23.595                                               |                                     | $0.1438 \times 10^{-5}$             |                | 8     | $E$   | 2          | 8    | $E$   | 184       |
| 6064.875670                    | 6064.897847                    | -22.177                                               |                                     | $0.2897 \times 10^{-4}$             |                | 8     | $E$   | 1          | 8    | $E$   | 184       |
| 6064.929410                    | 6064.940901                    | -11.491                                               | $0.6970 \times 10^{-4}$             | $0.3557 \times 10^{-6}$             | 19494.343      | 8     | $F_1$ | 2          | 8    | $F_2$ | 276       |
| 6064.999662                    | 6065.011959                    | -12.297                                               |                                     | $0.3852 \times 10^{-4}$             |                | 8     | $F_1$ | 1          | 8    | $F_2$ | 276       |
| 6065.166880                    | 6065.165919                    | 0.961                                                 | $0.7743 \times 10^{-4}$             | $0.1192 \times 10^{-5}$             | 6397.370       | 5     | $F_1$ | 2          | 5    | $F_2$ | 178       |
| 6065.271260                    | 6065.264668                    | 6.592                                                 | $0.1045 \times 10^{-3}$             | $0.5584 \times 10^{-6}$             | 18615.135      | 5     | $E$   | 1          | 5    | $E$   | 120       |



Table II (continued).

| $\tilde{\nu}_e/\text{cm}^{-1}$ | $\tilde{\nu}_c/\text{cm}^{-1}$ | $\tilde{\nu}_e - \tilde{\nu}_c/10^{-3}\text{cm}^{-1}$ | $I_e/\text{cm}^{-2}\text{atm}^{-1}$ | $I_c/\text{cm}^{-2}\text{atm}^{-1}$ | $I_e - I_c/\%$ | $J''$ | $C''$ | $\alpha''$ | $J'$ | $C'$  | $\alpha'$ |
|--------------------------------|--------------------------------|-------------------------------------------------------|-------------------------------------|-------------------------------------|----------------|-------|-------|------------|------|-------|-----------|
| 6065.343180                    | 6065.352295                    | -9.115                                                |                                     | $0.2014 \times 10^{-4}$             |                | 5     | $F_2$ | 1          | 6    | $F_1$ | 195       |
| 6065.649444                    | 6065.660935                    | -11.491                                               |                                     | $0.1588 \times 10^{-6}$             |                | 1     | $F_1$ | 1          | 1    | $F_2$ | 47        |
| 6065.958375                    | 6065.972600                    | -14.225                                               | $0.4609 \times 10^{-3}$             | $0.1794 \times 10^{-6}$             | 256833.071     | 2     | $E$   | 1          | 2    | $E$   | 57        |
| 6066.024147                    | 6066.033023                    | -8.876                                                | $0.4956 \times 10^{-3}$             | $0.1525 \times 10^{-6}$             | 324953.349     | 2     | $F_2$ | 1          | 2    | $F_1$ | 79        |
| 6066.110721                    | 6066.111390                    | -0.669                                                | $0.3875 \times 10^{-3}$             | $0.8473 \times 10^{-7}$             | 457240.999     | 3     | $F_2$ | 1          | 3    | $F_1$ | 120       |
| 6066.148834                    | 6066.153227                    | -4.393                                                | $0.2649 \times 10^{-3}$             | $0.7023 \times 10^{-7}$             | 377103.582     | 4     | $E$   | 1          | 4    | $E$   | 101       |
| 6066.165665                    | 6066.168060                    | -2.395                                                |                                     | $0.1352 \times 10^{-4}$             |                | 6     | $A_1$ | 1          | 6    | $A_2$ | 69        |
| 6066.274974                    | 6066.282812                    | -7.838                                                | $0.6441 \times 10^{-3}$             | $0.4231 \times 10^{-6}$             | 152143.812     | 3     | $F_1$ | 1          | 3    | $F_2$ | 114       |
| 6066.309483                    | 6066.310330                    | -0.847                                                | $0.4467 \times 10^{-3}$             | $0.3397 \times 10^{-6}$             | 131385.560     | 4     | $F_1$ | 1          | 4    | $F_2$ | 152       |
| 6066.332223                    | 6066.338382                    | -6.159                                                | $0.3261 \times 10^{-3}$             | $0.2623 \times 10^{-6}$             | 124220.761     | 5     | $F_2$ | 1          | 5    | $F_1$ | 187       |
| 6066.615835                    | 6066.632448                    | -16.613                                               |                                     | $0.1679 \times 10^{-6}$             |                | 6     | $A_2$ | 1          | 6    | $A_1$ | 76        |
| 6066.707797                    | 6066.708410                    | -0.613                                                | $0.1267 \times 10^{-2}$             | $0.2210 \times 10^{-5}$             | 57241.023      | 4     | $A_1$ | 1          | 4    | $A_2$ | 47        |
| 6066.844580                    | 6066.851098                    | -6.518                                                | $0.1387 \times 10^{-3}$             | $0.7779 \times 10^{-6}$             | 17730.411      | 6     | $F_2$ | 1          | 6    | $F_1$ | 210       |
| 6067.081860                    | 6067.092307                    | -10.447                                               | $0.2171 \times 10^{-1}$             | $0.2150 \times 10^{-1}$             | 0.988          | 5     | $F_1$ | 1          | 6    | $F_2$ | 204       |
| 6067.099820                    | 6067.112777                    | -12.957                                               | $0.2207 \times 10^{-1}$             | $0.2144 \times 10^{-1}$             | 2.917          | 5     | $F_2$ | 1          | 6    | $F_1$ | 197       |
| 6067.148480                    | 6067.153221                    | -4.741                                                | $0.1429 \times 10^{-1}$             | $0.1424 \times 10^{-1}$             | 0.378          | 5     | $E$   | 1          | 6    | $E$   | 135       |
| 6067.155540                    | 6067.161836                    | -6.296                                                | $0.2141 \times 10^{-1}$             | $0.2133 \times 10^{-1}$             | 0.362          | 5     | $F_1$ | 2          | 6    | $F_2$ | 205       |
| 6067.520000                    | 6067.498865                    | 21.135                                                | $0.2416 \times 10^{-3}$             | $0.8322 \times 10^{-6}$             | 28931.937      | 8     | $F_1$ | 2          | 8    | $F_2$ | 280       |
| 6067.502380                    | 6067.504892                    | -2.512                                                | $0.8787 \times 10^{-4}$             | $0.2715 \times 10^{-7}$             | 323513.402     | 2     | $F_2$ | 1          | 2    | $F_1$ | 80        |
| 6067.562004                    | 6067.560227                    | 1.777                                                 |                                     | $0.3334 \times 10^{-6}$             |                | 6     | $F_2$ | 2          | 6    | $F_1$ | 211       |
| 6067.591030                    | 6067.569923                    | 21.107                                                |                                     | $0.3791 \times 10^{-4}$             |                | 8     | $F_1$ | 1          | 8    | $F_2$ | 280       |
| 6067.583428                    | 6067.581943                    | 1.485                                                 |                                     | $0.1630 \times 10^{-5}$             |                | 6     | $F_2$ | 1          | 6    | $F_1$ | 211       |
| 6067.822803                    | 6067.818687                    | 4.116                                                 |                                     | $0.2365 \times 10^{-6}$             |                | 4     | $F_1$ | 1          | 4    | $F_2$ | 153       |
| 6067.978840                    | 6067.981708                    | -2.868                                                |                                     | $0.1716 \times 10^{-6}$             |                | 4     | $F_2$ | 1          | 4    | $F_1$ | 146       |
| 6068.152585                    | 6068.175434                    | -22.849                                               | $0.9086 \times 10^{-3}$             | $0.6173 \times 10^{-7}$             | -100.000       | 3     | $A_2$ | 1          | 3    | $A_1$ | 35        |
| 6068.778730                    | 6068.766996                    | 11.734                                                |                                     | $0.6343 \times 10^{-6}$             |                | 5     | $F_1$ | 1          | 5    | $F_2$ | 180       |
| 6068.765500                    | 6068.771784                    | -6.284                                                |                                     | $0.2797 \times 10^{-7}$             |                | 3     | $F_2$ | 1          | 3    | $F_1$ | 122       |
| 6068.989315                    | 6068.981205                    | 8.110                                                 |                                     | $0.5182 \times 10^{-6}$             |                | 5     | $E$   | 1          | 5    | $E$   | 121       |
| 6069.520628                    | 6069.520582                    | 0.046                                                 | $0.1693 \times 10^{-3}$             | $0.1197 \times 10^{-6}$             | 141320.957     | 7     | $F_2$ | 2          | 7    | $F_1$ | 252       |
| 6069.560069                    | 6069.558601                    | 1.468                                                 |                                     | $0.3239 \times 10^{-5}$             |                | 7     | $F_2$ | 1          | 7    | $F_1$ | 252       |
| 6069.766490                    | 6069.763216                    | 3.274                                                 | $0.5407 \times 10^{-4}$             | $0.4917 \times 10^{-8}$             | -100.000       | 8     | $F_1$ | 2          | 8    | $F_2$ | 282       |
| 6069.786000                    | 6069.784329                    | 1.671                                                 | $0.7339 \times 10^{-5}$             | $0.1491 \times 10^{-7}$             | 49115.401      | 9     | $F_1$ | 3          | 9    | $F_2$ | 306       |
| 6069.835284                    | 6069.834049                    | 1.235                                                 |                                     | $0.7384 \times 10^{-7}$             |                | 9     | $F_1$ | 2          | 9    | $F_2$ | 306       |
| 6069.896690                    | 6069.911427                    | -14.737                                               | $0.3552 \times 10^{-3}$             | $0.8549 \times 10^{-8}$             | -100.000       | 4     | $F_2$ | 1          | 4    | $F_1$ | 147       |
| 6069.922300                    | 6069.912467                    | 9.833                                                 |                                     | $0.2523 \times 10^{-8}$             |                | 3     | $F_1$ | 1          | 3    | $F_2$ | 115       |
| 6070.023509                    | 6070.026660                    | -3.151                                                | $0.3667 \times 10^{-3}$             | $0.2769 \times 10^{-5}$             | 13141.920      | 7     | $A_2$ | 1          | 7    | $A_1$ | 78        |
| 6070.085400                    | 6070.061299                    | 24.101                                                |                                     | $0.1856 \times 10^{-5}$             |                | 6     | $F_2$ | 2          | 6    | $F_1$ | 212       |
| 6070.107000                    | 6070.083015                    | 23.985                                                |                                     | $0.6804 \times 10^{-6}$             |                | 6     | $F_2$ | 1          | 6    | $F_1$ | 212       |
| 6070.132719                    | 6070.120812                    | 11.907                                                | $0.2830 \times 10^{-3}$             | $0.9309 \times 10^{-5}$             | 2940.058       | 9     | $A_1$ | 1          | 9    | $A_2$ | 106       |
| 6070.376880                    | 6070.383924                    | -7.044                                                | $0.1925 \times 10^{-3}$             | $0.4081 \times 10^{-5}$             | 4617.429       | 8     | $F_2$ | 2          | 8    | $F_1$ | 275       |
| 6070.416030                    | 6070.424318                    | -8.288                                                | $0.1435 \times 10^{-4}$             | $0.1713 \times 10^{-5}$             | 737.826        | 8     | $F_2$ | 1          | 8    | $F_1$ | 275       |
| 6070.504650                    | 6070.495868                    | 8.782                                                 | $0.3371 \times 10^{-4}$             | $0.1341 \times 10^{-5}$             | 2414.254       | 9     | $F_1$ | 2          | 9    | $F_2$ | 307       |
| 6070.574660                    | 6070.555940                    | 18.720                                                | $0.9365 \times 10^{-4}$             | $0.2294 \times 10^{-4}$             | 308.237        | 8     | $A_1$ | 1          | 8    | $A_2$ | 91        |
| 6070.656000                    | 6070.641521                    | 14.479                                                |                                     | $0.9510 \times 10^{-9}$             |                | 8     | $F_1$ | 2          | 8    | $F_2$ | 283       |
| 6070.699370                    | 6070.704444                    | -5.074                                                | $0.8912 \times 10^{-4}$             | $0.1451 \times 10^{-8}$             | -100.000       | 4     | $F_1$ | 1          | 4    | $F_2$ | 154       |
| 6071.215510                    | 6071.184627                    | 30.883                                                | $0.1506 \times 10^{-3}$             | $0.5658 \times 10^{-5}$             | 2561.889       | 9     | $F_1$ | 3          | 9    | $F_2$ | 308       |
| 6071.313730                    | 6071.309602                    | 4.128                                                 | $0.1049 \times 10^{-3}$             | $0.1169 \times 10^{-8}$             | -100.000       | 4     | $E$   | 1          | 4    | $E$   | 102       |
| 6071.353070                    | 6071.322669                    | 30.401                                                | $0.1171 \times 10^{-4}$             | $0.9914 \times 10^{-5}$             | 18.111         | 9     | $F_1$ | 1          | 9    | $F_2$ | 308       |
| 6071.536630                    | 6071.525214                    | 11.416                                                | $0.1234 \times 10^{-4}$             | $0.1320 \times 10^{-4}$             | -6.527         | 6     | $A_1$ | 1          | 7    | $A_2$ | 80        |
| 6071.790300                    | 6071.799404                    | -9.104                                                |                                     | $0.2337 \times 10^{-5}$             |                | 6     | $F_2$ | 1          | 7    | $F_1$ | 231       |

Table II (continued).

| $\tilde{\nu}_e/\text{cm}^{-1}$ | $\tilde{\nu}_c/\text{cm}^{-1}$ | $\tilde{\nu}_e - \tilde{\nu}_c/10^{-3}\text{cm}^{-1}$ | $I_e/\text{cm}^{-2}\text{atm}^{-1}$ | $I_c/\text{cm}^{-2}\text{atm}^{-1}$ | $I_e - I_c/\%$ | $J''$ | $C''$ | $\alpha''$ | $J'$ | $C'$  | $\alpha'$ |
|--------------------------------|--------------------------------|-------------------------------------------------------|-------------------------------------|-------------------------------------|----------------|-------|-------|------------|------|-------|-----------|
| 6071.848510                    | 6071.843671                    | 4.839                                                 | $0.3577 \times 10^{-4}$             | $0.6297 \times 10^{-6}$             | 5580.365       | 8     | $F_2$ | 2          | 8    | $F_1$ | 277       |
| 6071.887080                    | 6071.884066                    | 3.014                                                 |                                     | $0.6516 \times 10^{-5}$             |                | 8     | $F_2$ | 1          | 8    | $F_1$ | 277       |
| 6071.952240                    | 6071.951252                    | 0.988                                                 |                                     | $0.1104 \times 10^{-4}$             |                | 6     | $E$   | 1          | 7    | $E$   | 152       |
| 6071.975890                    | 6071.981962                    | -6.072                                                | $0.1550 \times 10^{-3}$             | $0.1304 \times 10^{-6}$             | 118722.094     | 5     | $E$   | 1          | 5    | $E$   | 122       |
| 6072.043730                    | 6072.046539                    | -2.809                                                | $0.2072 \times 10^{-3}$             | $0.1580 \times 10^{-6}$             | 131035.157     | 5     | $F_1$ | 2          | 5    | $F_2$ | 181       |
| 6072.093854                    | 6072.087624                    | 6.230                                                 |                                     | $0.5035 \times 10^{-10}$            |                | 4     | $F_2$ | 1          | 4    | $F_1$ | 148       |
| 6072.248000                    | 6072.247152                    | 0.848                                                 |                                     | $0.3079 \times 10^{-5}$             |                | 9     | $F_1$ | 2          | 9    | $F_2$ | 309       |
| 6072.336640                    | 6072.335474                    | 1.166                                                 | $0.2107 \times 10^{-4}$             | $0.8961 \times 10^{-5}$             | 135.119        | 9     | $F_1$ | 1          | 9    | $F_2$ | 309       |
| 6072.500850                    | 6072.495516                    | 5.334                                                 | $0.1094 \times 10^{-3}$             | $0.3808 \times 10^{-5}$             | 2772.803       | 9     | $F_2$ | 2          | 9    | $F_1$ | 317       |
| 6072.959600                    | 6072.958365                    | 1.235                                                 | $0.3241 \times 10^{-4}$             | $0.1429 \times 10^{-5}$             | 2167.958       | 10    | $F_1$ | 2          | 10   | $F_2$ | 346       |
| 6073.033270                    | 6073.033845                    | -0.575                                                |                                     | $0.9513 \times 10^{-5}$             |                | 10    | $F_1$ | 1          | 10   | $F_2$ | 346       |
| 6073.086490                    | 6073.071936                    | 14.554                                                | $0.1537 \times 10^{-4}$             | $0.2704 \times 10^{-8}$             | 568368.745     | 4     | $F_1$ | 1          | 4    | $F_2$ | 155       |
| 6073.296254                    | 6073.301043                    | -4.789                                                | $0.2586 \times 10^{-4}$             | $0.8929 \times 10^{-5}$             | 189.605        | 10    | $F_2$ | 2          | 10   | $F_1$ | 339       |
| 6073.376660                    | 6073.376909                    | -0.249                                                | $0.4719 \times 10^{-4}$             | $0.8306 \times 10^{-8}$             | 568010.642     | 5     | $F_1$ | 2          | 5    | $F_2$ | 182       |
| 6073.391500                    | 6073.391490                    | 0.010                                                 | $0.3153 \times 10^{-4}$             | $0.1421 \times 10^{-8}$             | -100.000       | 5     | $F_1$ | 1          | 5    | $F_2$ | 182       |
| 6073.407801                    | 6073.421790                    | -13.989                                               | $0.3112 \times 10^{-3}$             | $0.1217 \times 10^{-4}$             | 2457.452       | 9     | $A_2$ | 1          | 9    | $A_1$ | 101       |
| 6073.482917                    | 6073.485419                    | -2.502                                                |                                     | $0.7757 \times 10^{-7}$             |                | 8     | $F_2$ | 1          | 8    | $F_1$ | 278       |
| 6073.636870                    | 6073.656736                    | -19.866                                               |                                     | $0.3763 \times 10^{-4}$             |                | 10    | $A_2$ | 1          | 10   | $A_1$ | 119       |
| 6073.743000                    | 6073.757624                    | -14.624                                               |                                     | $0.3973 \times 10^{-5}$             |                | 8     | $F_1$ | 2          | 8    | $F_2$ | 285       |
| 6073.819290                    | 6073.817591                    | 1.699                                                 |                                     | $0.8426 \times 10^{-4}$             |                | 2     | $F_2$ | 1          | 3    | $F_1$ | 113       |
| 6074.017350                    | 6074.014914                    | 2.436                                                 | $0.5688 \times 10^{-4}$             | $0.1275 \times 10^{-7}$             | 445880.420     | 5     | $F_2$ | 1          | 5    | $F_1$ | 189       |
| 6074.099560                    | 6074.093929                    | 5.631                                                 | $0.4470 \times 10^{-4}$             | $0.4717 \times 10^{-4}$             | -5.238         | 2     | $E$   | 1          | 3    | $E$   | 72        |
| 6074.362330                    | 6074.359067                    | 3.263                                                 | $0.9605 \times 10^{-4}$             | $0.5659 \times 10^{-6}$             | 16873.086      | 6     | $F_2$ | 2          | 6    | $F_1$ | 213       |
| 6074.448310                    | 6074.444119                    | 4.191                                                 | $0.8550 \times 10^{-4}$             | $0.4634 \times 10^{-6}$             | 18351.518      | 6     | $F_1$ | 1          | 6    | $F_2$ | 221       |
| 6074.736228                    | 6074.726693                    | 9.535                                                 | $0.8741 \times 10^{-3}$             | $0.4691 \times 10^{-4}$             | 1763.212       | 1     | $F_1$ | 1          | 2    | $F_2$ | 83        |
| 6074.917661                    | 6074.933450                    | -15.789                                               | $0.1879 \times 10^{-3}$             | $0.7392 \times 10^{-4}$             | 154.177        | 6     | $A_2$ | 1          | 7    | $A_1$ | 72        |
| 6075.053655                    | 6075.036537                    | 17.118                                                | $0.2943 \times 10^{-3}$             | $0.7384 \times 10^{-6}$             | 39755.986      | 6     | $A_1$ | 1          | 6    | $A_2$ | 70        |
| 6075.786250                    | 6075.786237                    | 0.013                                                 |                                     | $0.9862 \times 10^{-7}$             |                | 6     | $F_1$ | 1          | 6    | $F_2$ | 222       |
| 6075.877670                    | 6075.882531                    | -4.861                                                | $0.1437 \times 10^{-4}$             | $0.1795 \times 10^{-5}$             | 700.429        | 9     | $F_2$ | 2          | 9    | $F_1$ | 320       |
| 6075.995620                    | 6076.002145                    | -6.525                                                | $0.1627 \times 10^{-4}$             | $0.7239 \times 10^{-5}$             | 124.740        | 10    | $F_1$ | 1          | 10   | $F_2$ | 349       |
| 6076.108778                    | 6076.123871                    | -15.093                                               | $0.9032 \times 10^{-3}$             | $0.5232 \times 10^{-5}$             | 17162.265      | 0     | $A_1$ | 1          | 1    | $A_2$ | 20        |
| 6076.205980                    | 6076.195610                    | 10.370                                                |                                     | $0.4403 \times 10^{-7}$             |                | 5     | $F_2$ | 1          | 5    | $F_1$ | 190       |
| 6076.314350                    | 6076.324913                    | -10.563                                               |                                     | $0.1953 \times 10^{-7}$             |                | 6     | $E$   | 1          | 6    | $E$   | 147       |
| 6076.469790                    | 6076.474669                    | -4.879                                                |                                     | $0.3344 \times 10^{-4}$             |                | 10    | $A_2$ | 1          | 10   | $A_1$ | 120       |
| 6076.701190                    | 6076.727426                    | -26.236                                               | $0.5695 \times 10^{-4}$             | $0.1666 \times 10^{-5}$             | 3318.713       | 10    | $F_2$ | 3          | 10   | $F_1$ | 342       |
| 6076.749299                    | 6076.768854                    | -19.555                                               |                                     | $0.1034 \times 10^{-6}$             |                | 1     | $F_1$ | 1          | 2    | $F_2$ | 84        |
| 6076.927000                    | 6076.939746                    | -12.746                                               | $0.1197 \times 10^{-1}$             | $0.1253 \times 10^{-1}$             | -4.485         | 6     | $E$   | 1          | 7    | $E$   | 154       |
| 6076.935010                    | 6076.947524                    | -12.514                                               |                                     | $0.1876 \times 10^{-1}$             |                | 6     | $F_2$ | 1          | 7    | $F_1$ | 235       |
| 6076.953830                    | 6076.973634                    | -19.804                                               |                                     | $0.3120 \times 10^{-1}$             |                | 6     | $A_2$ | 1          | 7    | $A_1$ | 73        |
| 6077.029070                    | 6077.033468                    | -4.398                                                | $0.1995 \times 10^{-1}$             | $0.1858 \times 10^{-1}$             | 7.385          | 6     | $F_2$ | 2          | 7    | $F_1$ | 236       |
| 6077.047000                    | 6077.052022                    | -5.022                                                | $0.1836 \times 10^{-1}$             | $0.1857 \times 10^{-1}$             | -1.111         | 6     | $F_1$ | 1          | 7    | $F_2$ | 230       |
| 6077.062910                    | 6077.067431                    | -4.521                                                | $0.3046 \times 10^{-1}$             | $0.3090 \times 10^{-1}$             | -1.410         | 6     | $A_1$ | 1          | 7    | $A_2$ | 81        |
| 6077.125000                    | 6077.154254                    | -29.254                                               | $0.4893 \times 10^{-4}$             | $0.9655 \times 10^{-5}$             | 406.785        | 9     | $A_1$ | 1          | 9    | $A_2$ | 108       |
| 6078.026000                    | 6078.023870                    | 2.130                                                 |                                     | $0.8811 \times 10^{-6}$             |                | 11    | $F_1$ | 3          | 11   | $F_2$ | 376       |
| 6078.100840                    | 6078.088740                    | 12.100                                                | $0.8134 \times 10^{-4}$             | $0.8742 \times 10^{-6}$             | 9204.658       | 7     | $F_1$ | 2          | 7    | $F_2$ | 248       |
| 6078.184160                    | 6078.137242                    | 46.918                                                |                                     | $0.1794 \times 10^{-5}$             |                | 11    | $E$   | 2          | 11   | $E$   | 251       |
| 6078.960369                    | 6078.975705                    | -15.336                                               |                                     | $0.4830 \times 10^{-5}$             |                | 11    | $F_2$ | 2          | 11   | $F_1$ | 383       |
| 6079.129240                    | 6079.144885                    | -15.645                                               | $0.1952 \times 10^{-4}$             | $0.1659 \times 10^{-4}$             | 17.688         | 11    | $F_2$ | 1          | 11   | $F_1$ | 383       |
| 6079.301090                    | 6079.292752                    | 8.338                                                 | $0.7975 \times 10^{-4}$             | $0.6517 \times 10^{-6}$             | 12137.764      | 6     | $A_2$ | 1          | 6    | $A_1$ | 77        |
| 6079.878758                    | 6079.878232                    | 0.526                                                 |                                     | $0.9934 \times 10^{-7}$             |                | 6     | $F_2$ | 2          | 6    | $F_1$ | 215       |

Table II (continued).

| $\tilde{\nu}_e/\text{cm}^{-1}$ | $\tilde{\nu}_c/\text{cm}^{-1}$ | $\tilde{\nu}_e - \tilde{\nu}_c/10^{-3}\text{cm}^{-1}$ | $I_e/\text{cm}^{-2}\text{atm}^{-1}$ | $I_c/\text{cm}^{-2}\text{atm}^{-1}$ | $I_e - I_c/\%$ | $J''$ | $C''$ | $\alpha''$ | $J'$ | $C'$  | $\alpha'$ |
|--------------------------------|--------------------------------|-------------------------------------------------------|-------------------------------------|-------------------------------------|----------------|-------|-------|------------|------|-------|-----------|
| 6079.882880                    | 6079.878690                    | 4.190                                                 |                                     | $0.1329 \times 10^{-5}$             |                | 8     | $F_2$ | 1          | 8    | $F_1$ | 280       |
| 6080.785642                    | 6080.796589                    | -10.947                                               |                                     | $0.6491 \times 10^{-5}$             |                | 7     | $E$   | 1          | 8    | $E$   | 174       |
| 6080.859531                    | 6080.863634                    | -4.103                                                |                                     | $0.3653 \times 10^{-5}$             |                | 7     | $F_1$ | 1          | 8    | $F_2$ | 261       |
| 6081.066953                    | 6081.048359                    | 18.594                                                |                                     | $0.1689 \times 10^{-4}$             |                | 7     | $F_1$ | 1          | 8    | $F_2$ | 262       |
| 6081.102970                    | 6081.090689                    | 12.281                                                | $0.6899 \times 10^{-4}$             | $0.5077 \times 10^{-4}$             | 35.874         | 7     | $A_2$ | 1          | 8    | $A_1$ | 91        |
| 6081.358810                    | 6081.371838                    | -13.028                                               |                                     | $0.8122 \times 10^{-6}$             |                | 8     | $F_2$ | 2          | 8    | $F_1$ | 281       |
| 6081.398670                    | 6081.412233                    | -13.563                                               |                                     | $0.1370 \times 10^{-6}$             |                | 8     | $F_2$ | 1          | 8    | $F_1$ | 281       |
| 6081.949280                    | 6081.958031                    | -8.751                                                |                                     | $0.6951 \times 10^{-8}$             |                | 1     | $F_1$ | 1          | 2    | $F_2$ | 85        |
| 6082.270670                    | 6082.291826                    | -21.156                                               | $0.2309 \times 10^{-4}$             | $0.3978 \times 10^{-6}$             | 5703.728       | 1     | $F_1$ | 1          | 2    | $F_2$ | 86        |
| 6082.890755                    | 6082.881462                    | 9.293                                                 |                                     | $0.2756 \times 10^{-5}$             |                | 9     | $A_1$ | 1          | 9    | $A_2$ | 109       |
| 6082.947500                    | 6082.930534                    | 16.966                                                | $0.1674 \times 10^{-4}$             | $0.1550 \times 10^{-4}$             | 7.994          | 3     | $F_2$ | 1          | 4    | $F_1$ | 137       |
| 6083.359716                    | 6083.369178                    | -9.462                                                | $0.3591 \times 10^{-3}$             | $0.3799 \times 10^{-3}$             | -5.466         | 3     | $A_2$ | 1          | 4    | $A_1$ | 52        |
| 6083.402000                    | 6083.409396                    | -7.396                                                |                                     | $0.3717 \times 10^{-6}$             |                | 7     | $F_2$ | 2          | 7    | $F_1$ | 257       |
| 6083.440135                    | 6083.447415                    | -7.280                                                |                                     | $0.4620 \times 10^{-6}$             |                | 7     | $F_2$ | 1          | 7    | $F_1$ | 257       |
| 6083.643270                    | 6083.642965                    | 0.305                                                 | $0.1676 \times 10^{-3}$             | $0.1932 \times 10^{-3}$             | -13.263        | 8     | $F_2$ | 2          | 9    | $F_1$ | 291       |
| 6083.721160                    | 6083.726992                    | -5.832                                                | $0.1498 \times 10^{-3}$             | $0.1617 \times 10^{-3}$             | -7.341         | 3     | $F_2$ | 1          | 4    | $F_1$ | 138       |
| 6083.860380                    | 6083.803470                    | 56.910                                                | $0.1089 \times 10^{-3}$             | $0.1275 \times 10^{-3}$             | -14.563        | 8     | $F_1$ | 2          | 9    | $F_2$ | 284       |
| 6083.838580                    | 6083.805911                    | 32.669                                                | $0.1172 \times 10^{-3}$             | $0.1236 \times 10^{-3}$             | -5.144         | 8     | $E$   | 2          | 9    | $E$   | 190       |
| 6083.987070                    | 6083.994313                    | -7.243                                                | $0.1105 \times 10^{-3}$             | $0.1196 \times 10^{-3}$             | -7.637         | 3     | $F_1$ | 1          | 4    | $F_2$ | 143       |
| 6084.286830                    | 6084.161378                    | 125.452                                               | $0.1488 \times 10^{-3}$             | $0.1344 \times 10^{-3}$             | 10.683         | 8     | $F_2$ | 1          | 9    | $F_1$ | 292       |
| 6084.337050                    | 6084.336311                    | 0.739                                                 |                                     | $0.1116 \times 10^{-5}$             |                | 7     | $F_2$ | 1          | 8    | $F_1$ | 257       |
| 6084.781100                    | 6084.785289                    | -4.189                                                |                                     | $0.1634 \times 10^{-4}$             |                | 3     | $F_1$ | 1          | 4    | $F_2$ | 144       |
| 6085.165743                    | 6085.158725                    | 7.018                                                 | $0.7271 \times 10^{-3}$             | $0.6793 \times 10^{-4}$             | 970.304        | 2     | $E$   | 1          | 3    | $E$   | 73        |
| 6085.251907                    | 6085.244612                    | 7.295                                                 | $0.1074 \times 10^{-2}$             | $0.1017 \times 10^{-3}$             | 956.167        | 2     | $F_2$ | 1          | 3    | $F_1$ | 115       |
| 6086.003920                    | 6086.006656                    | -2.736                                                |                                     | $0.8591 \times 10^{-4}$             |                | 9     | $A_2$ | 1          | 10   | $A_1$ | 108       |
| 6086.217000                    | 6086.230047                    | -13.047                                               | $0.7339 \times 10^{-5}$             | $0.1487 \times 10^{-5}$             | 393.406        | 10    | $F_1$ | 1          | 10   | $F_2$ | 354       |
| 6086.623270                    | 6086.631868                    | -8.598                                                | $0.1565 \times 10^{-1}$             | $0.1532 \times 10^{-1}$             | 2.133          | 7     | $F_1$ | 1          | 8    | $F_2$ | 265       |
| 6086.634520                    | 6086.648718                    | -14.198                                               | $0.1553 \times 10^{-1}$             | $0.1527 \times 10^{-1}$             | 1.735          | 7     | $F_2$ | 1          | 8    | $F_1$ | 259       |
| 6086.745180                    | 6086.735503                    | 9.677                                                 | $0.2579 \times 10^{-1}$             | $0.2523 \times 10^{-1}$             | 2.208          | 7     | $A_2$ | 1          | 8    | $A_1$ | 92        |
| 6086.779080                    | 6086.781341                    | -2.261                                                |                                     | $0.1504 \times 10^{-1}$             |                | 7     | $F_2$ | 2          | 8    | $F_1$ | 260       |
| 6086.797520                    | 6086.802655                    | -5.135                                                |                                     | $0.1002 \times 10^{-1}$             |                | 7     | $E$   | 1          | 8    | $E$   | 177       |
| 6086.829720                    | 6086.830292                    | -0.572                                                | $0.1459 \times 10^{-1}$             | $0.1499 \times 10^{-1}$             | -2.660         | 7     | $F_1$ | 2          | 8    | $F_2$ | 266       |
| 6086.962500                    | 6086.965714                    | -3.214                                                |                                     | $0.2421 \times 10^{-5}$             |                | 2     | $F_2$ | 1          | 3    | $F_1$ | 116       |
| 6087.183355                    | 6087.199363                    | -16.008                                               | $0.8120 \times 10^{-3}$             | $0.1428 \times 10^{-4}$             | 5587.953       | 1     | $F_1$ | 1          | 2    | $F_2$ | 87        |
| 6088.272000                    | 6088.289602                    | -17.602                                               |                                     | $0.9618 \times 10^{-6}$             |                | 2     | $E$   | 1          | 3    | $E$   | 74        |
| 6088.939940                    | 6088.935413                    | 4.527                                                 |                                     | $0.1329 \times 10^{-6}$             |                | 1     | $F_1$ | 1          | 2    | $F_2$ | 88        |
| 6089.291456                    | 6089.226938                    | 64.518                                                |                                     | $0.5079 \times 10^{-5}$             |                | 8     | $F_2$ | 2          | 9    | $F_1$ | 293       |
| 6089.685840                    | 6089.699942                    | -14.102                                               | $0.1789 \times 10^{-4}$             | $0.2087 \times 10^{-4}$             | -14.281        | 8     | $F_2$ | 2          | 9    | $F_1$ | 294       |
| 6089.949480                    | 6090.022394                    | -72.914                                               | $0.4538 \times 10^{-4}$             | $0.5695 \times 10^{-4}$             | -20.315        | 8     | $A_1$ | 1          | 9    | $A_2$ | 99        |
| 6090.066016                    | 6090.046537                    | 19.479                                                |                                     | $0.1390 \times 10^{-4}$             |                | 8     | $E$   | 2          | 9    | $E$   | 192       |
| 6090.110180                    | 6090.089466                    | 20.714                                                | $0.1687 \times 10^{-4}$             | $0.2224 \times 10^{-4}$             | -24.160        | 8     | $F_1$ | 1          | 9    | $F_2$ | 286       |
| 6090.145570                    | 6090.159173                    | -13.603                                               | $0.4927 \times 10^{-4}$             | $0.5269 \times 10^{-4}$             | -6.499         | 8     | $F_2$ | 1          | 9    | $F_1$ | 295       |
| 6090.414060                    | 6090.407324                    | 6.736                                                 |                                     | $0.2083 \times 10^{-3}$             |                | 9     | $A_1$ | 1          | 10   | $A_2$ | 103       |
| 6092.122012                    | 6092.110149                    | 11.863                                                | $0.1010 \times 10^{-4}$             | $0.1119 \times 10^{-4}$             | -9.743         | 4     | $F_1$ | 1          | 5    | $F_2$ | 168       |
| 6092.225280                    | 6092.215019                    | 10.261                                                | $0.5761 \times 10^{-4}$             | $0.5522 \times 10^{-4}$             | 4.333          | 4     | $F_2$ | 1          | 5    | $F_1$ | 176       |
| 6093.168209                    | 6093.171045                    | -2.836                                                | $0.1421 \times 10^{-4}$             | $0.2607 \times 10^{-7}$             | 54403.801      | 2     | $E$   | 1          | 3    | $E$   | 75        |
| 6093.205670                    | 6093.217426                    | -11.756                                               | $0.2967 \times 10^{-3}$             | $0.3029 \times 10^{-3}$             | -2.042         | 4     | $F_2$ | 1          | 5    | $F_1$ | 177       |
| 6093.488540                    | 6093.501944                    | -13.404                                               | $0.1696 \times 10^{-3}$             | $0.1717 \times 10^{-3}$             | -1.239         | 4     | $E$   | 1          | 5    | $E$   | 114       |
| 6093.568000                    | 6093.574867                    | -6.867                                                | $0.7043 \times 10^{-4}$             | $0.8310 \times 10^{-6}$             | 8375.757       | 2     | $F_2$ | 1          | 3    | $F_1$ | 119       |
| 6093.619000                    | 6093.613758                    | 5.242                                                 | $0.1547 \times 10^{-3}$             | $0.4376 \times 10^{-4}$             | 253.486        | 8     | $A_1$ | 1          | 9    | $A_2$ | 100       |

Table II (continued).

| $\tilde{\nu}_e/\text{cm}^{-1}$ | $\tilde{\nu}_c/\text{cm}^{-1}$ | $\tilde{\nu}_e - \tilde{\nu}_c/10^{-3}\text{cm}^{-1}$ | $I_e/\text{cm}^{-2}\text{atm}^{-1}$ | $I_c/\text{cm}^{-2}\text{atm}^{-1}$ | $I_e - I_c/\%$ | $J''$ | $C''$                 | $\alpha''$ | $J'$ | $C'$                  | $\alpha'$ |
|--------------------------------|--------------------------------|-------------------------------------------------------|-------------------------------------|-------------------------------------|----------------|-------|-----------------------|------------|------|-----------------------|-----------|
| 6093.607000                    | 6093.623369                    | -16.369                                               |                                     | $0.3081 \times 10^{-4}$             |                | 8     | <i>E</i>              | 1          | 9    | <i>E</i>              | 193       |
| 6093.715770                    | 6093.718696                    | -2.926                                                | $0.4059 \times 10^{-4}$             | $0.3771 \times 10^{-6}$             | 10664.300      | 2     | <i>E</i>              | 1          | 3    | <i>E</i>              | 76        |
| 6093.774330                    | 6093.786901                    | -12.571                                               | $0.1772 \times 10^{-3}$             | $0.1849 \times 10^{-3}$             | -4.188         | 4     | <i>F</i> <sub>1</sub> | 1          | 5    | <i>F</i> <sub>2</sub> | 169       |
| 6094.473603                    | 6094.481995                    | -8.392                                                | $0.2708 \times 10^{-3}$             | $0.2859 \times 10^{-3}$             | -5.277         | 4     | <i>A</i> <sub>1</sub> | 1          | 5    | <i>A</i> <sub>2</sub> | 60        |
| 6094.763920                    | 6094.772177                    | -8.257                                                | $0.2613 \times 10^{-4}$             | $0.2561 \times 10^{-4}$             | 2.011          | 4     | <i>F</i> <sub>1</sub> | 1          | 5    | <i>F</i> <sub>2</sub> | 170       |
| 6095.639840                    | 6095.636677                    | 3.163                                                 | $0.1153 \times 10^{-2}$             | $0.1711 \times 10^{-3}$             | 573.911        | 3     | <i>F</i> <sub>1</sub> | 1          | 4    | <i>F</i> <sub>2</sub> | 145       |
| 6095.832156                    | 6095.830714                    | 1.442                                                 | $0.1123 \times 10^{-2}$             | $0.1679 \times 10^{-3}$             | 568.928        | 3     | <i>F</i> <sub>2</sub> | 1          | 4    | <i>F</i> <sub>1</sub> | 139       |
| 6096.168360                    | 6096.167082                    | 1.278                                                 | $0.2006 \times 10^{-1}$             | $0.1946 \times 10^{-1}$             | 3.074          | 8     | <i>A</i> <sub>1</sub> | 1          | 9    | <i>A</i> <sub>2</sub> | 101       |
| 6096.174730                    | 6096.181696                    | -6.966                                                | $0.1204 \times 10^{-1}$             | $0.1166 \times 10^{-1}$             | 3.297          | 8     | <i>F</i> <sub>1</sub> | 1          | 9    | <i>F</i> <sub>2</sub> | 290       |
| 6096.180500                    | 6096.190541                    | -10.041                                               | $0.7596 \times 10^{-2}$             | $0.7764 \times 10^{-2}$             | -2.161         | 8     | <i>E</i>              | 1          | 9    | <i>E</i>              | 194       |
| 6096.255433                    | 6096.252318                    | 3.115                                                 | $0.2088 \times 10^{-2}$             | $0.3086 \times 10^{-3}$             | 576.533        | 3     | <i>A</i> <sub>2</sub> | 1          | 4    | <i>A</i> <sub>1</sub> | 53        |
| 6096.372380                    | 6096.352242                    | 20.138                                                | $0.1179 \times 10^{-1}$             | $0.1140 \times 10^{-1}$             | 3.392          | 8     | <i>F</i> <sub>2</sub> | 1          | 9    | <i>F</i> <sub>1</sub> | 298       |
| 6096.424580                    | 6096.427589                    | -3.009                                                | $0.1163 \times 10^{-1}$             | $0.1132 \times 10^{-1}$             | 2.711          | 8     | <i>F</i> <sub>1</sub> | 2          | 9    | <i>F</i> <sub>2</sub> | 291       |
| 6096.485130                    | 6096.478535                    | 6.595                                                 | $0.8876 \times 10^{-2}$             | $0.7499 \times 10^{-2}$             | 18.356         | 8     | <i>E</i>              | 2          | 9    | <i>E</i>              | 195       |
| 6096.501040                    | 6096.495686                    | 5.354                                                 | $0.1041 \times 10^{-1}$             | $0.1123 \times 10^{-1}$             | -7.311         | 8     | <i>F</i> <sub>2</sub> | 2          | 9    | <i>F</i> <sub>1</sub> | 299       |
| 6097.544782                    | 6097.545836                    | -1.054                                                |                                     | $0.1615 \times 10^{-7}$             |                | 2     | <i>F</i> <sub>2</sub> | 1          | 3    | <i>F</i> <sub>1</sub> | 120       |
| 6097.831744                    | 6097.824097                    | 7.647                                                 |                                     | $0.2315 \times 10^{-6}$             |                | 9     | <i>F</i> <sub>2</sub> | 2          | 10   | <i>F</i> <sub>1</sub> | 313       |
| 6097.904900                    | 6097.915937                    | -11.037                                               | $0.7058 \times 10^{-4}$             | $0.1057 \times 10^{-4}$             | 567.828        | 3     | <i>F</i> <sub>2</sub> | 1          | 4    | <i>F</i> <sub>1</sub> | 140       |
| 6098.099599                    | 6098.083131                    | 16.468                                                |                                     | $0.3355 \times 10^{-4}$             |                | 9     | <i>A</i> <sub>2</sub> | 1          | 10   | <i>A</i> <sub>1</sub> | 109       |
| 6098.447886                    | 6098.456151                    | -8.265                                                | $0.6468 \times 10^{-3}$             | $0.2073 \times 10^{-4}$             | 3019.842       | 2     | <i>E</i>              | 1          | 3    | <i>E</i>              | 77        |
| 6098.463128                    | 6098.474685                    | -11.557                                               | $0.9817 \times 10^{-3}$             | $0.3229 \times 10^{-4}$             | 2940.620       | 2     | <i>F</i> <sub>2</sub> | 1          | 3    | <i>F</i> <sub>1</sub> | 121       |
| 6098.712590                    | 6098.709407                    | 3.183                                                 | $0.1649 \times 10^{-4}$             | $0.2465 \times 10^{-5}$             | 568.949        | 3     | <i>F</i> <sub>1</sub> | 1          | 4    | <i>F</i> <sub>2</sub> | 146       |
| 6099.643000                    | 6099.646430                    | -3.430                                                | $0.1691 \times 10^{-4}$             | $0.2593 \times 10^{-5}$             | 552.119        | 3     | <i>F</i> <sub>1</sub> | 1          | 4    | <i>F</i> <sub>2</sub> | 147       |
| 6099.709670                    | 6099.720951                    | -11.281                                               | $0.1534 \times 10^{-4}$             | $0.2192 \times 10^{-5}$             | 599.838        | 3     | <i>F</i> <sub>2</sub> | 1          | 4    | <i>F</i> <sub>1</sub> | 141       |
| 6100.199860                    | 6100.206230                    | -6.370                                                | $0.6312 \times 10^{-4}$             | $0.1976 \times 10^{-5}$             | 3093.914       | 2     | <i>F</i> <sub>2</sub> | 1          | 3    | <i>F</i> <sub>1</sub> | 122       |
| 6100.342508                    | 6100.290041                    | 52.467                                                | $0.6806 \times 10^{-3}$             | $0.7737 \times 10^{-3}$             | -12.035        | 9     | <i>A</i> <sub>1</sub> | 1          | 10   | <i>A</i> <sub>2</sub> | 104       |
| 6100.410285                    | 6100.413683                    | -3.398                                                | $0.7985 \times 10^{-5}$             | $0.1776 \times 10^{-5}$             | 349.709        | 3     | <i>F</i> <sub>1</sub> | 1          | 4    | <i>F</i> <sub>2</sub> | 148       |
| 6100.846039                    | 6100.785002                    | 61.037                                                | $0.1368 \times 10^{-2}$             | $0.1472 \times 10^{-2}$             | -7.085         | 9     | <i>A</i> <sub>2</sub> | 1          | 10   | <i>A</i> <sub>1</sub> | 110       |
| 6100.755357                    | 6100.787112                    | -31.755                                               | $0.4098 \times 10^{-3}$             | $0.4779 \times 10^{-3}$             | -14.253        | 9     | <i>F</i> <sub>1</sub> | 3          | 10   | <i>F</i> <sub>2</sub> | 323       |
| 6100.804921                    | 6100.836832                    | -31.911                                               | $0.1436 \times 10^{-3}$             | $0.1331 \times 10^{-3}$             | 7.859          | 9     | <i>F</i> <sub>1</sub> | 2          | 10   | <i>F</i> <sub>2</sub> | 323       |
| 6100.858452                    | 6100.854860                    | 3.592                                                 |                                     | $0.1642 \times 10^{-5}$             |                | 2     | <i>E</i>              | 1          | 3    | <i>E</i>              | 78        |
| 6100.891190                    | 6100.925154                    | -33.964                                               | $0.2711 \times 10^{-4}$             | $0.7758 \times 10^{-4}$             | -65.054        | 9     | <i>F</i> <sub>1</sub> | 1          | 10   | <i>F</i> <sub>2</sub> | 323       |
| 6100.956536                    | 6100.928946                    | 27.590                                                | $0.7672 \times 10^{-3}$             | $0.8275 \times 10^{-3}$             | -7.284         | 9     | <i>F</i> <sub>2</sub> | 2          | 10   | <i>F</i> <sub>1</sub> | 316       |
| 6101.101160                    | 6101.073661                    | 27.499                                                |                                     | $0.4531 \times 10^{-4}$             |                | 9     | <i>F</i> <sub>2</sub> | 1          | 10   | <i>F</i> <sub>1</sub> | 316       |
| 6101.215984                    | 6101.205161                    | 10.823                                                | $0.4665 \times 10^{-4}$             | $0.4081 \times 10^{-4}$             | 14.324         | 5     | <i>F</i> <sub>1</sub> | 2          | 6    | <i>F</i> <sub>2</sub> | 206       |
| 6101.228000                    | 6101.219741                    | 8.259                                                 |                                     | $0.1120 \times 10^{-4}$             |                | 5     | <i>F</i> <sub>1</sub> | 1          | 6    | <i>F</i> <sub>2</sub> | 206       |
| 6101.269311                    | 6101.262277                    | 7.034                                                 | $0.6270 \times 10^{-4}$             | $0.6216 \times 10^{-4}$             | 0.861          | 5     | <i>E</i>              | 1          | 6    | <i>E</i>              | 136       |
| 6101.371251                    | 6101.447635                    | -76.384                                               | $0.4609 \times 10^{-3}$             | $0.5629 \times 10^{-3}$             | -18.125        | 9     | <i>E</i>              | 1          | 10   | <i>E</i>              | 215       |
| 6101.487747                    | 6101.526598                    | -38.851                                               |                                     | $0.3215 \times 10^{-3}$             |                | 9     | <i>F</i> <sub>1</sub> | 3          | 10   | <i>F</i> <sub>2</sub> | 324       |
| 6101.537506                    | 6101.576317                    | -38.811                                               | $0.5446 \times 10^{-3}$             | $0.6964 \times 10^{-3}$             | -21.797        | 9     | <i>F</i> <sub>1</sub> | 2          | 10   | <i>F</i> <sub>2</sub> | 324       |
| 6101.805563                    | 6101.796757                    | 8.806                                                 | $0.3425 \times 10^{-5}$             | $0.3853 \times 10^{-5}$             | -11.111        | 5     | <i>F</i> <sub>2</sub> | 1          | 6    | <i>F</i> <sub>1</sub> | 198       |
| 6102.672216                    | 6102.680242                    | -8.026                                                |                                     | $0.1536 \times 10^{-3}$             |                | 9     | <i>A</i> <sub>1</sub> | 1          | 10   | <i>A</i> <sub>2</sub> | 105       |
| 6102.643667                    | 6102.691452                    | -47.785                                               |                                     | $0.1927 \times 10^{-6}$             |                | 9     | <i>F</i> <sub>1</sub> | 3          | 10   | <i>F</i> <sub>2</sub> | 326       |
| 6102.698296                    | 6102.699460                    | -1.164                                                | $0.7577 \times 10^{-4}$             | $0.7381 \times 10^{-4}$             | 2.651          | 9     | <i>F</i> <sub>1</sub> | 2          | 10   | <i>F</i> <sub>2</sub> | 325       |
| 6102.726584                    | 6102.739847                    | -13.263                                               | $0.4580 \times 10^{-3}$             | $0.4520 \times 10^{-3}$             | 1.339          | 5     | <i>F</i> <sub>1</sub> | 2          | 6    | <i>F</i> <sub>2</sub> | 207       |
| 6102.784816                    | 6102.787783                    | -2.967                                                |                                     | $0.1737 \times 10^{-5}$             |                | 9     | <i>F</i> <sub>1</sub> | 1          | 10   | <i>F</i> <sub>2</sub> | 325       |
| 6103.023596                    | 6103.036483                    | -12.887                                               | $0.2396 \times 10^{-3}$             | $0.2395 \times 10^{-3}$             | 0.056          | 5     | <i>E</i>              | 1          | 6    | <i>E</i>              | 137       |
| 6103.313505                    | 6103.326549                    | -13.044                                               | $0.2899 \times 10^{-3}$             | $0.2939 \times 10^{-3}$             | -1.365         | 5     | <i>F</i> <sub>2</sub> | 1          | 6    | <i>F</i> <sub>1</sub> | 199       |
| 6104.145030                    | 6104.140792                    | 4.238                                                 |                                     | $0.9018 \times 10^{-8}$             |                | 3     | <i>F</i> <sub>2</sub> | 1          | 4    | <i>F</i> <sub>1</sub> | 142       |
| 6104.284160                    | 6104.296138                    | -11.978                                               | $0.2309 \times 10^{-3}$             | $0.2219 \times 10^{-3}$             | 4.034          | 5     | <i>F</i> <sub>1</sub> | 1          | 6    | <i>F</i> <sub>2</sub> | 208       |

Table II (continued).

| $\tilde{\nu}_e/\text{cm}^{-1}$ | $\tilde{\nu}_c/\text{cm}^{-1}$ | $\tilde{\nu}_e - \tilde{\nu}_c/10^{-3}\text{cm}^{-1}$ | $I_e/\text{cm}^{-2}\text{atm}^{-1}$ | $I_c/\text{cm}^{-2}\text{atm}^{-1}$ | $I_e - I_c/\%$ | $J''$ | $C''$ | $\alpha''$ | $J'$ | $C'$  | $\alpha'$ |
|--------------------------------|--------------------------------|-------------------------------------------------------|-------------------------------------|-------------------------------------|----------------|-------|-------|------------|------|-------|-----------|
| 6104.479925                    | 6104.466583                    | 13.342                                                |                                     | $0.3602 \times 10^{-7}$             |                | 3     | $F_1$ | 1          | 4    | $F_2$ | 150       |
| 6104.748987                    | 6104.753469                    | -4.482                                                |                                     | $0.8676 \times 10^{-5}$             |                | 5     | $E$   | 1          | 6    | $E$   | 138       |
| 6104.808886                    | 6104.812265                    | -3.379                                                |                                     | $0.9330 \times 10^{-5}$             |                | 5     | $F_2$ | 1          | 6    | $F_1$ | 200       |
| 6104.990810                    | 6104.973753                    | 17.057                                                | $0.8198 \times 10^{-4}$             | $0.3456 \times 10^{-5}$             | 2272.264       | 3     | $A_2$ | 1          | 4    | $A_1$ | 54        |
| 6105.365000                    | 6105.358814                    | 6.186                                                 |                                     | $0.1066 \times 10^{-5}$             |                | 3     | $F_2$ | 1          | 4    | $F_1$ | 145       |
| 6105.369380                    | 6105.371634                    | -2.254                                                | $0.1512 \times 10^{-3}$             | $0.6771 \times 10^{-6}$             | 22232.122      | 3     | $F_1$ | 1          | 4    | $F_2$ | 151       |
| 6105.538431                    | 6105.542282                    | -3.851                                                |                                     | $0.9290 \times 10^{-5}$             |                | 9     | $F_1$ | 2          | 10   | $F_2$ | 327       |
| 6105.625730                    | 6105.630604                    | -4.874                                                | $0.8562 \times 10^{-2}$             | $0.8113 \times 10^{-2}$             | 5.540          | 9     | $F_1$ | 1          | 10   | $F_2$ | 327       |
| 6105.625730                    | 6105.633259                    | -7.529                                                | $0.8562 \times 10^{-2}$             | $0.8151 \times 10^{-2}$             | 5.037          | 9     | $F_2$ | 1          | 10   | $F_1$ | 320       |
| 6106.044080                    | 6106.041627                    | 2.453                                                 |                                     | $0.4088 \times 10^{-3}$             |                | 4     | $A_1$ | 1          | 5    | $A_2$ | 61        |
| 6106.037000                    | 6106.043499                    | -6.499                                                | $0.5338 \times 10^{-2}$             | $0.4906 \times 10^{-2}$             | 8.806          | 9     | $E$   | 1          | 10   | $E$   | 218       |
| 6106.040000                    | 6106.054043                    | -14.043                                               | $0.7608 \times 10^{-2}$             | $0.7180 \times 10^{-2}$             | 5.956          | 9     | $F_1$ | 2          | 10   | $F_2$ | 328       |
| 6106.055000                    | 6106.075584                    | -20.584                                               | $0.1262 \times 10^{-1}$             | $0.1268 \times 10^{-1}$             | -0.451         | 9     | $A_1$ | 1          | 10   | $A_2$ | 106       |
| 6106.128347                    | 6106.142366                    | -14.019                                               |                                     | $0.8405 \times 10^{-5}$             |                | 9     | $F_1$ | 1          | 10   | $F_2$ | 328       |
| 6106.193670                    | 6106.193639                    | 0.031                                                 |                                     | $0.2358 \times 10^{-3}$             |                | 4     | $F_1$ | 1          | 5    | $F_2$ | 171       |
| 6106.220720                    | 6106.223042                    | -2.322                                                |                                     | $0.7068 \times 10^{-2}$             |                | 9     | $F_1$ | 3          | 10   | $F_2$ | 329       |
| 6106.250350                    | 6106.254885                    | -4.535                                                | $0.7652 \times 10^{-2}$             | $0.7253 \times 10^{-2}$             | 5.505          | 9     | $F_2$ | 2          | 10   | $F_1$ | 321       |
| 6106.283830                    | 6106.285108                    | -1.278                                                | $0.1275 \times 10^{-1}$             | $0.1205 \times 10^{-1}$             | 5.774          | 9     | $A_2$ | 1          | 10   | $A_1$ | 112       |
| 6106.298000                    | 6106.300421                    | -2.421                                                |                                     | $0.1518 \times 10^{-3}$             |                | 4     | $E$   | 1          | 5    | $E$   | 115       |
| 6107.166932                    | 6107.172055                    | -5.123                                                | $0.1160 \times 10^{-2}$             | $0.2649 \times 10^{-3}$             | 337.871        | 4     | $F_2$ | 1          | 5    | $F_1$ | 179       |
| 6108.208330                    | 6108.209245                    | -0.915                                                | $0.1166 \times 10^{-4}$             | $0.3455 \times 10^{-6}$             | 3274.991       | 3     | $F_1$ | 1          | 4    | $F_2$ | 152       |
| 6108.324920                    | 6108.290012                    | 34.908                                                |                                     | $0.4340 \times 10^{-7}$             |                | 10    | $A_2$ | 1          | 11   | $A_1$ | 111       |
| 6108.400000                    | 6108.376170                    | 23.830                                                |                                     | $0.4719 \times 10^{-8}$             |                | 10    | $F_2$ | 1          | 11   | $F_1$ | 350       |
| 6109.205660                    | 6109.212072                    | -6.412                                                | $0.3513 \times 10^{-4}$             | $0.8438 \times 10^{-5}$             | 316.334        | 4     | $F_1$ | 1          | 5    | $F_2$ | 172       |
| 6109.262130                    | 6109.227451                    | 34.679                                                |                                     | $0.4435 \times 10^{-4}$             |                | 10    | $A_1$ | 1          | 11   | $A_2$ | 120       |
| 6109.592172                    | 6109.594234                    | -2.062                                                | $0.6483 \times 10^{-4}$             | $0.1438 \times 10^{-4}$             | 350.975        | 4     | $E$   | 1          | 5    | $E$   | 116       |
| 6109.721455                    | 6109.717601                    | 3.854                                                 | $0.8964 \times 10^{-3}$             | $0.4352 \times 10^{-4}$             | 1959.964       | 3     | $F_1$ | 1          | 4    | $F_2$ | 153       |
| 6109.882088                    | 6109.884866                    | -2.778                                                | $0.9959 \times 10^{-3}$             | $0.4986 \times 10^{-4}$             | 1897.249       | 3     | $F_2$ | 1          | 4    | $F_1$ | 146       |
| 6110.035950                    | 6110.044478                    | -8.528                                                | $0.1963 \times 10^{-2}$             | $0.1000 \times 10^{-3}$             | 1862.052       | 3     | $A_2$ | 1          | 4    | $A_1$ | 55        |
| 6110.074276                    | 6110.070200                    | 4.076                                                 |                                     | $0.4166 \times 10^{-4}$             |                | 6     | $F_1$ | 1          | 7    | $F_2$ | 231       |
| 6110.153303                    | 6110.147797                    | 5.506                                                 | $0.9893 \times 10^{-4}$             | $0.9892 \times 10^{-4}$             | 0.005          | 6     | $F_2$ | 2          | 7    | $F_1$ | 237       |
| 6110.176366                    | 6110.169514                    | 6.852                                                 | $0.1242 \times 10^{-4}$             | $0.1132 \times 10^{-4}$             | 9.731          | 6     | $F_2$ | 1          | 7    | $F_1$ | 237       |
| 6110.892000                    | 6110.885954                    | 6.046                                                 |                                     | $0.9738 \times 10^{-5}$             |                | 6     | $E$   | 1          | 7    | $E$   | 155       |
| 6110.962400                    | 6110.958557                    | 3.843                                                 | $0.3256 \times 10^{-4}$             | $0.3230 \times 10^{-4}$             | 0.794          | 6     | $F_1$ | 1          | 7    | $F_2$ | 232       |
| 6111.159420                    | 6111.163401                    | -3.981                                                | $0.3860 \times 10^{-4}$             | $0.9409 \times 10^{-5}$             | 310.261        | 4     | $F_1$ | 1          | 5    | $F_2$ | 173       |
| 6111.257490                    | 6111.254086                    | 3.404                                                 | $0.2299 \times 10^{-4}$             | $0.5805 \times 10^{-5}$             | 296.055        | 4     | $E$   | 1          | 5    | $E$   | 117       |
| 6111.296670                    | 6111.292414                    | 4.256                                                 | $0.1393 \times 10^{-4}$             | $0.4084 \times 10^{-5}$             | 241.119        | 4     | $F_2$ | 1          | 5    | $F_1$ | 181       |
| 6111.797440                    | 6111.814586                    | -17.146                                               | $0.1230 \times 10^{-3}$             | $0.6613 \times 10^{-5}$             | 1759.892       | 3     | $F_2$ | 1          | 4    | $F_1$ | 147       |
| 6112.018293                    | 6112.025604                    | -7.311                                                | $0.1110 \times 10^{-2}$             | $0.1060 \times 10^{-2}$             | 4.766          | 6     | $A_1$ | 1          | 7    | $A_2$ | 82        |
| 6112.359647                    | 6112.310871                    | 48.776                                                |                                     | $0.9058 \times 10^{-4}$             |                | 10    | $A_2$ | 1          | 11   | $A_1$ | 112       |
| 6112.324344                    | 6112.332301                    | -7.957                                                | $0.5074 \times 10^{-3}$             | $0.5101 \times 10^{-3}$             | -0.527         | 6     | $F_1$ | 1          | 7    | $F_2$ | 233       |
| 6112.347640                    | 6112.346236                    | 1.404                                                 | $0.3929 \times 10^{-4}$             | $0.1736 \times 10^{-4}$             | 126.299        | 4     | $A_1$ | 1          | 5    | $A_2$ | 62        |
| 6112.434594                    | 6112.429570                    | 5.024                                                 |                                     | $0.3327 \times 10^{-5}$             |                | 4     | $F_1$ | 1          | 5    | $F_2$ | 174       |
| 6112.592070                    | 6112.599270                    | -7.200                                                |                                     | $0.3891 \times 10^{-3}$             |                | 6     | $F_2$ | 2          | 7    | $F_1$ | 238       |
| 6112.594799                    | 6112.603359                    | -8.560                                                |                                     | $0.1114 \times 10^{-4}$             |                | 3     | $F_1$ | 1          | 4    | $F_2$ | 154       |
| 6112.607987                    | 6112.620986                    | -12.999                                               |                                     | $0.4678 \times 10^{-4}$             |                | 6     | $F_2$ | 1          | 7    | $F_1$ | 238       |
| 6112.892314                    | 6112.900304                    | -7.990                                                | $0.5825 \times 10^{-3}$             | $0.5829 \times 10^{-3}$             | -0.061         | 6     | $A_2$ | 1          | 7    | $A_1$ | 74        |
| 6113.970930                    | 6113.980436                    | -9.506                                                | $0.4506 \times 10^{-4}$             | $0.4471 \times 10^{-4}$             | 0.784          | 6     | $F_2$ | 2          | 7    | $F_1$ | 239       |
| 6113.991700                    | 6114.002152                    | -10.452                                               | $0.2075 \times 10^{-3}$             | $0.2256 \times 10^{-3}$             | -8.020         | 6     | $F_2$ | 1          | 7    | $F_1$ | 239       |
| 6114.082210                    | 6114.090553                    | -8.343                                                | $0.1652 \times 10^{-3}$             | $0.1681 \times 10^{-3}$             | -1.720         | 6     | $E$   | 1          | 7    | $E$   | 156       |

Table II (continued).

| $\tilde{\nu}_e/\text{cm}^{-1}$ | $\tilde{\nu}_c/\text{cm}^{-1}$ | $\tilde{\nu}_e - \tilde{\nu}_c/10^{-3}\text{cm}^{-1}$ | $I_e/\text{cm}^{-2}\text{atm}^{-1}$ | $I_c/\text{cm}^{-2}\text{atm}^{-1}$ | $I_e - I_c/\%$ | $J''$ | $C''$ | $\alpha''$ | $J'$ | $C'$  | $\alpha'$ |
|--------------------------------|--------------------------------|-------------------------------------------------------|-------------------------------------|-------------------------------------|----------------|-------|-------|------------|------|-------|-----------|
| 6114.677000                    | 6114.370065                    | 306.935                                               | $0.1076 \times 10^{-1}$             | $0.9062 \times 10^{-2}$             | 18.739         | 10    | $A_2$ | 1          | 11   | $A_1$ | 113       |
| 6114.496000                    | 6114.479371                    | 16.629                                                |                                     | $0.8651 \times 10^{-2}$             |                | 10    | $A_1$ | 1          | 11   | $A_2$ | 121       |
| 6114.747980                    | 6114.741181                    | 6.799                                                 |                                     | $0.3755 \times 10^{-5}$             |                | 6     | $F_2$ | 2          | 7    | $F_1$ | 240       |
| 6114.984805                    | 6114.970850                    | 13.955                                                |                                     | $0.1085 \times 10^{-6}$             |                | 3     | $F_1$ | 1          | 4    | $F_2$ | 155       |
| 6115.022082                    | 6115.032242                    | -10.160                                               |                                     | $0.8052 \times 10^{-7}$             |                | 4     | $E$   | 1          | 5    | $E$   | 118       |
| 6115.430970                    | 6115.415897                    | 15.073                                                | $0.3809 \times 10^{-5}$             | $0.5954 \times 10^{-7}$             | 6297.707       | 4     | $F_2$ | 1          | 5    | $F_1$ | 184       |
| 6115.516600                    | 6115.503779                    | 12.821                                                | $0.5585 \times 10^{-5}$             | $0.1083 \times 10^{-6}$             | 5058.153       | 4     | $F_1$ | 1          | 5    | $F_2$ | 175       |
| 6116.592054                    | 6116.590584                    | 1.470                                                 | $0.9727 \times 10^{-3}$             | $0.2937 \times 10^{-3}$             | 231.203        | 5     | $F_1$ | 1          | 6    | $F_2$ | 209       |
| 6116.722467                    | 6116.723467                    | -1.000                                                | $0.8991 \times 10^{-3}$             | $0.2760 \times 10^{-3}$             | 225.804        | 5     | $F_2$ | 1          | 6    | $F_1$ | 201       |
| 6117.080380                    | 6117.059714                    | 20.666                                                | $0.3909 \times 10^{-4}$             | $0.1731 \times 10^{-5}$             | 2158.375       | 4     | $F_2$ | 1          | 5    | $F_1$ | 186       |
| 6117.385150                    | 6117.388363                    | -3.213                                                | $0.1799 \times 10^{-3}$             | $0.6841 \times 10^{-6}$             | 26196.369      | 4     | $A_1$ | 1          | 5    | $A_2$ | 63        |
| 6117.529850                    | 6117.530121                    | -0.271                                                | $0.7836 \times 10^{-4}$             | $0.1279 \times 10^{-5}$             | 6028.553       | 4     | $F_1$ | 1          | 5    | $F_2$ | 178       |
| 6117.632290                    | 6117.625817                    | 6.473                                                 | $0.4555 \times 10^{-4}$             | $0.1377 \times 10^{-5}$             | 3208.516       | 4     | $E$   | 1          | 5    | $E$   | 120       |
| 6118.079172                    | 6118.088434                    | -9.262                                                | $0.6652 \times 10^{-3}$             | $0.2163 \times 10^{-3}$             | 207.491        | 5     | $E$   | 1          | 6    | $E$   | 139       |
| 6118.256198                    | 6118.266964                    | -10.766                                               | $0.9783 \times 10^{-3}$             | $0.3193 \times 10^{-3}$             | 206.411        | 5     | $F_1$ | 2          | 6    | $F_2$ | 210       |
| 6118.470916                    | 6118.447800                    | 23.116                                                | $0.2850 \times 10^{-3}$             | $0.3075 \times 10^{-3}$             | -7.323         | 10    | $F_2$ | 3          | 11   | $F_1$ | 358       |
| 6118.703223                    | 6118.680560                    | 22.663                                                |                                     | $0.1747 \times 10^{-3}$             |                | 10    | $F_2$ | 1          | 11   | $F_1$ | 358       |
| 6118.928922                    | 6118.928228                    | 0.694                                                 | $0.2365 \times 10^{-3}$             | $0.2311 \times 10^{-3}$             | 2.342          | 7     | $A_2$ | 1          | 8    | $A_1$ | 93        |
| 6119.803060                    | 6119.802048                    | 1.012                                                 | $0.2527 \times 10^{-4}$             | $0.2816 \times 10^{-4}$             | -10.251        | 7     | $F_2$ | 2          | 8    | $F_1$ | 262       |
| 6119.841646                    | 6119.840067                    | 1.579                                                 | $0.8354 \times 10^{-5}$             | $0.8101 \times 10^{-5}$             | 3.118          | 7     | $F_2$ | 1          | 8    | $F_1$ | 262       |
| 6119.970350                    | 6119.971462                    | -1.112                                                | $0.6052 \times 10^{-4}$             | $0.5931 \times 10^{-4}$             | 2.045          | 7     | $F_1$ | 2          | 8    | $F_2$ | 267       |
| 6120.020480                    | 6120.027153                    | -6.673                                                | $0.1143 \times 10^{-4}$             | $0.8965 \times 10^{-5}$             | 27.492         | 7     | $F_1$ | 1          | 8    | $F_2$ | 267       |
| 6120.585900                    | 6120.573803                    | 12.097                                                | $0.1064 \times 10^{-2}$             | $0.7089 \times 10^{-4}$             | 1401.017       | 4     | $A_1$ | 1          | 5    | $A_2$ | 64        |
| 6120.775000                    | 6120.767463                    | 7.537                                                 |                                     | $0.9672 \times 10^{-5}$             |                | 5     | $F_1$ | 2          | 6    | $F_2$ | 211       |
| 6120.788300                    | 6120.782043                    | 6.257                                                 |                                     | $0.8927 \times 10^{-5}$             |                | 5     | $F_1$ | 1          | 6    | $F_2$ | 211       |
| 6121.130226                    | 6121.116617                    | 13.609                                                | $0.8477 \times 10^{-3}$             | $0.5166 \times 10^{-4}$             | 1541.026       | 4     | $F_1$ | 1          | 5    | $F_2$ | 180       |
| 6121.353083                    | 6121.342353                    | 10.730                                                | $0.5986 \times 10^{-3}$             | $0.3892 \times 10^{-4}$             | 1437.831       | 4     | $E$   | 1          | 5    | $E$   | 121       |
| 6121.545739                    | 6121.544635                    | 1.104                                                 | $0.6251 \times 10^{-3}$             | $0.6118 \times 10^{-3}$             | 2.170          | 7     | $F_1$ | 2          | 8    | $F_2$ | 268       |
| 6121.682593                    | 6121.681195                    | 1.398                                                 | $0.1150 \times 10^{-2}$             | $0.7874 \times 10^{-4}$             | 1360.503       | 4     | $F_2$ | 1          | 5    | $F_1$ | 188       |
| 6121.801752                    | 6121.801219                    | 0.533                                                 | $0.3741 \times 10^{-3}$             | $0.3649 \times 10^{-3}$             | 2.514          | 7     | $E$   | 1          | 8    | $E$   | 179       |
| 6122.053802                    | 6122.054387                    | -0.585                                                | $0.4142 \times 10^{-3}$             | $0.4058 \times 10^{-3}$             | 2.070          | 7     | $F_2$ | 2          | 8    | $F_1$ | 263       |
| 6122.090798                    | 6122.092405                    | -1.607                                                | $0.6184 \times 10^{-4}$             | $0.6112 \times 10^{-4}$             | 1.183          | 7     | $F_2$ | 1          | 8    | $F_1$ | 263       |
| 6122.658568                    | 6122.661545                    | -2.977                                                |                                     | $0.7266 \times 10^{-3}$             |                | 11    | $F_1$ | 3          | 12   | $F_2$ | 381       |
| 6123.002832                    | 6122.993274                    | 9.558                                                 |                                     | $0.1112 \times 10^{-4}$             |                | 5     | $F_1$ | 2          | 6    | $F_2$ | 212       |
| 6123.002832                    | 6123.005554                    | -2.722                                                |                                     | $0.1448 \times 10^{-2}$             |                | 11    | $F_1$ | 1          | 12   | $F_2$ | 381       |
| 6123.012500                    | 6123.019677                    | -7.177                                                |                                     | $0.2462 \times 10^{-4}$             |                | 5     | $F_2$ | 1          | 6    | $F_1$ | 203       |
| 6123.046000                    | 6123.045288                    | 0.712                                                 | $0.1920 \times 10^{-4}$             | $0.8884 \times 10^{-5}$             | 116.119        | 5     | $E$   | 1          | 6    | $E$   | 140       |
| 6123.106114                    | 6123.093785                    | 12.329                                                |                                     | $0.1086 \times 10^{-5}$             |                | 5     | $F_2$ | 1          | 6    | $F_1$ | 204       |
| 6123.341219                    | 6123.376514                    | -35.295                                               |                                     | $0.6691 \times 10^{-4}$             |                | 11    | $F_2$ | 3          | 12   | $F_1$ | 376       |
| 6123.406345                    | 6123.417134                    | -10.789                                               | $0.5546 \times 10^{-3}$             | $0.5832 \times 10^{-3}$             | -4.901         | 7     | $A_2$ | 1          | 8    | $A_1$ | 94        |
| 6123.482054                    | 6123.517237                    | -35.183                                               |                                     | $0.2076 \times 10^{-2}$             |                | 11    | $F_2$ | 2          | 12   | $F_1$ | 376       |
| 6123.624220                    | 6123.631530                    | -7.310                                                |                                     | $0.6087 \times 10^{-4}$             |                | 7     | $F_2$ | 2          | 8    | $F_1$ | 264       |
| 6123.661453                    | 6123.669549                    | -8.096                                                |                                     | $0.2212 \times 10^{-3}$             |                | 7     | $F_2$ | 1          | 8    | $F_1$ | 264       |
| 6123.652866                    | 6123.686416                    | -33.550                                               |                                     | $0.1442 \times 10^{-6}$             |                | 11    | $F_2$ | 1          | 12   | $F_1$ | 376       |
| 6123.824000                    | 6123.827224                    | -3.224                                                |                                     | $0.2499 \times 10^{-3}$             |                | 7     | $F_1$ | 1          | 8    | $F_2$ | 269       |
| 6124.119275                    | 6124.139479                    | -20.204                                               |                                     | $0.3655 \times 10^{-3}$             |                | 11    | $F_2$ | 3          | 12   | $F_1$ | 377       |
| 6124.260092                    | 6124.280202                    | -20.110                                               | $0.1187 \times 10^{-2}$             | $0.9724 \times 10^{-3}$             | 22.075         | 11    | $F_2$ | 2          | 12   | $F_1$ | 377       |
| 6124.338941                    | 6124.343110                    | -4.169                                                | $0.1809 \times 10^{-3}$             | $0.1118 \times 10^{-4}$             | 1518.209       | 4     | $E$   | 1          | 5    | $E$   | 122       |
| 6124.407256                    | 6124.410741                    | -3.485                                                |                                     | $0.1476 \times 10^{-4}$             |                | 4     | $F_1$ | 1          | 5    | $F_2$ | 181       |
| 6124.428910                    | 6124.449381                    | -20.471                                               |                                     | $0.7493 \times 10^{-4}$             |                | 11    | $F_2$ | 1          | 12   | $F_1$ | 377       |



Table II (continued).

| $\tilde{\nu}_e/\text{cm}^{-1}$ | $\tilde{\nu}_c/\text{cm}^{-1}$ | $\tilde{\nu}_e - \tilde{\nu}_c/10^{-3}\text{cm}^{-1}$ | $I_e/\text{cm}^{-2}\text{atm}^{-1}$ | $I_c/\text{cm}^{-2}\text{atm}^{-1}$ | $I_e - I_c/\%$ | $J''$ | $C''$ | $\alpha''$ | $J'$ | $C'$  | $\alpha'$ |
|--------------------------------|--------------------------------|-------------------------------------------------------|-------------------------------------|-------------------------------------|----------------|-------|-------|------------|------|-------|-----------|
| 6124.597660                    | 6124.590711                    | 6.949                                                 | $0.1246 \times 10^{-4}$             | $0.1546 \times 10^{-4}$             | -19.417        | 5     | $F_1$ | 1          | 6    | $F_2$ | 213       |
| 6124.906058                    | 6124.934744                    | -28.686                                               | $0.1081 \times 10^{-2}$             | $0.1344 \times 10^{-2}$             | -19.574        | 11    | $F_1$ | 3          | 12   | $F_2$ | 384       |
| 6124.981519                    | 6124.992284                    | -10.765                                               | $0.7300 \times 10^{-3}$             | $0.4449 \times 10^{-4}$             | 1540.864       | 4     | $A_1$ | 1          | 5    | $A_2$ | 65        |
| 6125.250014                    | 6125.278753                    | -28.739                                               |                                     | $0.2268 \times 10^{-3}$             |                | 11    | $F_1$ | 1          | 12   | $F_2$ | 384       |
| 6125.410337                    | 6125.441816                    | -31.479                                               | $0.3777 \times 10^{-3}$             | $0.4694 \times 10^{-3}$             | -19.538        | 11    | $E$   | 2          | 12   | $E$   | 256       |
| 6125.563944                    | 6125.595267                    | -31.323                                               | $0.2835 \times 10^{-3}$             | $0.2132 \times 10^{-3}$             | 32.950         | 11    | $E$   | 1          | 12   | $E$   | 256       |
| 6125.742269                    | 6125.703559                    | 38.710                                                | $0.5465 \times 10^{-3}$             | $0.7203 \times 10^{-3}$             | -24.134        | 11    | $F_2$ | 3          | 12   | $F_1$ | 378       |
| 6125.742712                    | 6125.741111                    | 1.601                                                 | $0.1951 \times 10^{-3}$             | $0.6023 \times 10^{-5}$             | 3139.093       | 4     | $F_1$ | 1          | 5    | $F_2$ | 182       |
| 6125.883266                    | 6125.844282                    | 38.984                                                |                                     | $0.1040 \times 10^{-3}$             |                | 11    | $F_2$ | 2          | 12   | $F_1$ | 378       |
| 6126.051330                    | 6126.013461                    | 37.869                                                |                                     | $0.8919 \times 10^{-5}$             |                | 11    | $F_2$ | 1          | 12   | $F_1$ | 378       |
| 6126.274049                    | 6126.278193                    | -4.144                                                | $0.9683 \times 10^{-5}$             | $0.1287 \times 10^{-5}$             | 652.647        | 5     | $F_2$ | 1          | 6    | $F_1$ | 206       |
| 6126.336170                    | 6126.354703                    | -18.533                                               | $0.1102 \times 10^{-4}$             | $0.1002 \times 10^{-5}$             | 999.578        | 5     | $F_1$ | 2          | 6    | $F_2$ | 214       |
| 6126.365390                    | 6126.362817                    | 2.573                                                 | $0.2958 \times 10^{-4}$             | $0.1807 \times 10^{-5}$             | 1537.252       | 4     | $F_2$ | 1          | 5    | $F_1$ | 189       |
| 6127.067429                    | 6127.065389                    | 2.040                                                 | $0.5267 \times 10^{-3}$             | $0.2117 \times 10^{-3}$             | 148.803        | 6     | $E$   | 1          | 7    | $E$   | 157       |
| 6127.103485                    | 6127.100320                    | 3.165                                                 | $0.7606 \times 10^{-3}$             | $0.3082 \times 10^{-3}$             | 146.798        | 6     | $F_2$ | 1          | 7    | $F_1$ | 241       |
| 6127.181525                    | 6127.179558                    | 1.967                                                 | $0.1195 \times 10^{-2}$             | $0.4895 \times 10^{-3}$             | 144.123        | 6     | $A_2$ | 1          | 7    | $A_1$ | 75        |
| 6127.468380                    | 6127.475593                    | -7.213                                                | $0.7621 \times 10^{-4}$             | $0.7145 \times 10^{-4}$             | 6.668          | 8     | $F_1$ | 2          | 9    | $F_2$ | 292       |
| 6127.513050                    | 6127.521459                    | -8.409                                                | $0.1028 \times 10^{-3}$             | $0.9888 \times 10^{-4}$             | 3.961          | 8     | $F_2$ | 1          | 9    | $F_1$ | 300       |
| 6128.553112                    | 6128.543512                    | 9.600                                                 |                                     | $0.2198 \times 10^{-6}$             |                | 4     | $F_2$ | 1          | 5    | $F_1$ | 190       |
| 6128.638740                    | 6128.642169                    | -3.429                                                | $0.3386 \times 10^{-4}$             | $0.3490 \times 10^{-4}$             | -2.980         | 8     | $F_2$ | 2          | 9    | $F_1$ | 301       |
| 6128.680090                    | 6128.682564                    | -2.474                                                | $0.2791 \times 10^{-4}$             | $0.3398 \times 10^{-4}$             | -17.868        | 8     | $F_2$ | 1          | 9    | $F_1$ | 301       |
| 6128.708000                    | 6128.698664                    | 9.336                                                 | $0.7339 \times 10^{-5}$             | $0.3339 \times 10^{-6}$             | 2097.643       | 4     | $E$   | 1          | 5    | $E$   | 123       |
| 6128.762590                    | 6128.765877                    | -3.287                                                | $0.6466 \times 10^{-4}$             | $0.6693 \times 10^{-4}$             | -3.394         | 8     | $E$   | 2          | 9    | $E$   | 196       |
| 6128.846310                    | 6128.851519                    | -5.209                                                | $0.1199 \times 10^{-4}$             | $0.8340 \times 10^{-5}$             | 43.759         | 8     | $E$   | 1          | 9    | $E$   | 196       |
| 6129.028968                    | 6129.036453                    | -7.485                                                | $0.7736 \times 10^{-3}$             | $0.3426 \times 10^{-3}$             | 125.799        | 6     | $F_2$ | 2          | 7    | $F_1$ | 242       |
| 6129.363668                    | 6129.373116                    | -9.448                                                | $0.7398 \times 10^{-3}$             | $0.3372 \times 10^{-3}$             | 119.402        | 6     | $F_1$ | 1          | 7    | $F_2$ | 235       |
| 6129.434968                    | 6129.425505                    | 9.463                                                 | $0.1677 \times 10^{-4}$             | $0.1159 \times 10^{-5}$             | 1346.352       | 5     | $E$   | 1          | 6    | $E$   | 144       |
| 6129.889459                    | 6129.903144                    | -13.685                                               | $0.1310 \times 10^{-2}$             | $0.6057 \times 10^{-3}$             | 116.290        | 6     | $A_1$ | 1          | 7    | $A_2$ | 83        |
| 6129.943633                    | 6129.930420                    | 13.213                                                |                                     | $0.1259 \times 10^{-6}$             |                | 5     | $E$   | 1          | 6    | $E$   | 145       |
| 6129.927781                    | 6129.932773                    | -4.992                                                | $0.2429 \times 10^{-4}$             | $0.3342 \times 10^{-5}$             | 626.710        | 5     | $F_1$ | 1          | 6    | $F_2$ | 218       |
| 6130.371550                    | 6130.369051                    | 2.499                                                 | $0.2725 \times 10^{-4}$             | $0.4783 \times 10^{-5}$             | 469.783        | 5     | $F_2$ | 1          | 6    | $F_1$ | 211       |
| 6130.814157                    | 6130.803628                    | 10.529                                                | $0.6429 \times 10^{-3}$             | $0.6266 \times 10^{-3}$             | 2.606          | 8     | $F_2$ | 2          | 9    | $F_1$ | 302       |
| 6131.050446                    | 6131.042206                    | 8.240                                                 | $0.3562 \times 10^{-3}$             | $0.3457 \times 10^{-3}$             | 3.023          | 8     | $E$   | 2          | 9    | $E$   | 197       |
| 6131.136894                    | 6131.127848                    | 9.046                                                 | $0.1684 \times 10^{-4}$             | $0.1811 \times 10^{-4}$             | -7.010         | 8     | $E$   | 1          | 9    | $E$   | 197       |
| 6131.286967                    | 6131.278250                    | 8.717                                                 | $0.4822 \times 10^{-3}$             | $0.4804 \times 10^{-3}$             | 0.383          | 8     | $F_1$ | 2          | 9    | $F_2$ | 294       |
| 6131.356619                    | 6131.349309                    | 7.310                                                 | $0.1359 \times 10^{-4}$             | $0.1492 \times 10^{-4}$             | -8.920         | 8     | $F_1$ | 1          | 9    | $F_2$ | 294       |
| 6131.997955                    | 6131.979621                    | 18.334                                                | $0.3454 \times 10^{-4}$             | $0.1729 \times 10^{-4}$             | 99.753         | 6     | $F_1$ | 1          | 7    | $F_2$ | 236       |
| 6132.045327                    | 6132.032758                    | 12.569                                                | $0.6461 \times 10^{-3}$             | $0.4122 \times 10^{-4}$             | 1467.422       | 5     | $F_1$ | 1          | 6    | $F_2$ | 219       |
| 6132.361418                    | 6132.355442                    | 5.976                                                 |                                     | $0.3714 \times 10^{-2}$             |                | 12    | $A_1$ | 1          | 13   | $A_2$ | 137       |
| 6132.622277                    | 6132.601999                    | 20.278                                                |                                     | $0.4420 \times 10^{-5}$             |                | 6     | $F_2$ | 2          | 7    | $F_1$ | 243       |
| 6132.644120                    | 6132.623715                    | 20.405                                                | $0.1818 \times 10^{-4}$             | $0.8799 \times 10^{-5}$             | 106.622        | 6     | $F_2$ | 1          | 7    | $F_1$ | 243       |
| 6132.893856                    | 6132.870123                    | 23.733                                                | $0.7762 \times 10^{-3}$             | $0.5580 \times 10^{-4}$             | 1290.949       | 5     | $F_2$ | 1          | 6    | $F_1$ | 212       |
| 6133.354153                    | 6133.342431                    | 11.722                                                | $0.8386 \times 10^{-3}$             | $0.5591 \times 10^{-4}$             | 1399.882       | 5     | $E$   | 1          | 6    | $E$   | 146       |
| 6133.458721                    | 6133.457173                    | 1.548                                                 | $0.2256 \times 10^{-3}$             | $0.2223 \times 10^{-3}$             | 1.495          | 8     | $F_1$ | 1          | 9    | $F_2$ | 295       |
| 6133.511870                    | 6133.502866                    | 9.004                                                 | $0.1052 \times 10^{-2}$             | $0.8838 \times 10^{-4}$             | 1090.294       | 5     | $F_1$ | 2          | 6    | $F_2$ | 220       |
| 6133.609737                    | 6133.602795                    | 6.942                                                 | $0.3953 \times 10^{-3}$             | $0.3840 \times 10^{-3}$             | 2.934          | 8     | $A_1$ | 1          | 9    | $A_2$ | 102       |
| 6134.804940                    | 6134.803752                    | 1.188                                                 | $0.3591 \times 10^{-4}$             | $0.3059 \times 10^{-4}$             | 17.409         | 6     | $A_1$ | 1          | 7    | $A_2$ | 84        |
| 6134.855380                    | 6134.854469                    | 0.911                                                 | $0.2290 \times 10^{-4}$             | $0.1904 \times 10^{-4}$             | 20.254         | 6     | $F_1$ | 1          | 7    | $F_2$ | 237       |
| 6134.967760                    | 6134.973668                    | -5.908                                                | $0.3547 \times 10^{-4}$             | $0.2086 \times 10^{-4}$             | 70.052         | 6     | $F_2$ | 2          | 7    | $F_1$ | 244       |
| 6134.989830                    | 6134.995384                    | -5.554                                                | $0.1990 \times 10^{-4}$             | $0.1026 \times 10^{-4}$             | 94.042         | 6     | $F_2$ | 1          | 7    | $F_1$ | 244       |

Table II (continued).

| $\tilde{\nu}_e/\text{cm}^{-1}$ | $\tilde{\nu}_c/\text{cm}^{-1}$ | $\tilde{\nu}_e - \tilde{\nu}_c/10^{-3}\text{cm}^{-1}$ | $I_e/\text{cm}^{-2}\text{atm}^{-1}$ | $I_c/\text{cm}^{-2}\text{atm}^{-1}$ | $I_e - I_c/\%$ | $J''$ | $C''$ | $\alpha''$ | $J'$ | $C'$  | $\alpha'$ |
|--------------------------------|--------------------------------|-------------------------------------------------------|-------------------------------------|-------------------------------------|----------------|-------|-------|------------|------|-------|-----------|
| 6135.147950                    | 6135.160395                    | -12.445                                               | $0.1609 \times 10^{-3}$             | $0.8281 \times 10^{-4}$             | 94.291         | 6     | $A_2$ | 1          | 7    | $A_1$ | 76        |
| 6135.937090                    | 6135.967880                    | -30.790                                               | $0.9695 \times 10^{-4}$             | $0.1071 \times 10^{-3}$             | -9.491         | 9     | $A_1$ | 1          | 10   | $A_2$ | 107       |
| 6135.977445                    | 6136.008582                    | -31.137                                               | $0.7462 \times 10^{-4}$             | $0.7254 \times 10^{-4}$             | 2.869          | 9     | $F_1$ | 2          | 10   | $F_2$ | 330       |
| 6135.991197                    | 6136.022790                    | -31.593                                               |                                     | $0.5762 \times 10^{-4}$             |                | 9     | $E$   | 1          | 10   | $E$   | 219       |
| 6137.171449                    | 6137.167891                    | 3.558                                                 | $0.3288 \times 10^{-3}$             | $0.2447 \times 10^{-4}$             | 1243.957       | 5     | $F_2$ | 1          | 6    | $F_1$ | 213       |
| 6137.264741                    | 6137.261028                    | 3.713                                                 | $0.3413 \times 10^{-3}$             | $0.2616 \times 10^{-4}$             | 1204.474       | 5     | $F_1$ | 1          | 6    | $F_2$ | 221       |
| 6137.375756                    | 6137.384400                    | -8.644                                                | $0.7907 \times 10^{-4}$             | $0.7778 \times 10^{-4}$             | 1.661          | 9     | $F_1$ | 3          | 10   | $F_2$ | 331       |
| 6137.426840                    | 6137.434119                    | -7.279                                                |                                     | $0.3918 \times 10^{-4}$             |                | 9     | $F_1$ | 2          | 10   | $F_2$ | 331       |
| 6137.534727                    | 6137.528274                    | 6.453                                                 | $0.5991 \times 10^{-3}$             | $0.3111 \times 10^{-3}$             | 92.554         | 7     | $F_1$ | 1          | 8    | $F_2$ | 271       |
| 6137.569723                    | 6137.563550                    | 6.173                                                 | $0.5661 \times 10^{-3}$             | $0.2985 \times 10^{-3}$             | 89.642         | 7     | $F_2$ | 1          | 8    | $F_1$ | 265       |
| 6138.587120                    | 6138.588566                    | -1.446                                                | $0.3180 \times 10^{-4}$             | $0.2364 \times 10^{-5}$             | 1245.352       | 5     | $F_1$ | 2          | 6    | $F_2$ | 222       |
| 6138.602090                    | 6138.603146                    | -1.056                                                | $0.8797 \times 10^{-4}$             | $0.6581 \times 10^{-5}$             | 1236.684       | 5     | $F_1$ | 1          | 6    | $F_2$ | 222       |
| 6139.091580                    | 6139.101169                    | -9.589                                                | $0.6013 \times 10^{-4}$             | $0.4380 \times 10^{-5}$             | 1272.798       | 5     | $E$   | 1          | 6    | $E$   | 147       |
| 6139.821446                    | 6139.823711                    | -2.265                                                | $0.1045 \times 10^{-2}$             | $0.6097 \times 10^{-3}$             | 71.386         | 7     | $A_2$ | 1          | 8    | $A_1$ | 95        |
| 6139.878624                    | 6139.864431                    | 14.193                                                | $0.1028 \times 10^{-2}$             | $0.1028 \times 10^{-2}$             | 0.015          | 9     | $A_2$ | 1          | 10   | $A_1$ | 113       |
| 6140.103000                    | 6140.103801                    | -0.801                                                |                                     | $0.3256 \times 10^{-3}$             |                | 7     | $F_2$ | 2          | 8    | $F_1$ | 266       |
| 6140.304200                    | 6140.291346                    | 12.854                                                |                                     | $0.4529 \times 10^{-3}$             |                | 9     | $F_1$ | 3          | 10   | $F_2$ | 332       |
| 6140.299000                    | 6140.300336                    | -1.336                                                |                                     | $0.2079 \times 10^{-3}$             |                | 7     | $E$   | 1          | 8    | $E$   | 181       |
| 6140.358170                    | 6140.341066                    | 17.104                                                |                                     | $0.3452 \times 10^{-4}$             |                | 9     | $F_1$ | 2          | 10   | $F_2$ | 332       |
| 6140.443500                    | 6140.429388                    | 14.112                                                |                                     | $0.7031 \times 10^{-5}$             |                | 9     | $F_1$ | 1          | 10   | $F_2$ | 332       |
| 6140.527920                    | 6140.512574                    | 15.346                                                | $0.7361 \times 10^{-3}$             | $0.7482 \times 10^{-3}$             | -1.616         | 9     | $A_1$ | 1          | 10   | $A_2$ | 108       |
| 6141.236248                    | 6141.243319                    | -7.071                                                | $0.5666 \times 10^{-3}$             | $0.3480 \times 10^{-3}$             | 62.831         | 7     | $F_1$ | 2          | 8    | $F_2$ | 272       |
| 6141.430485                    | 6141.497539                    | -67.054                                               |                                     | $0.1945 \times 10^{-2}$             |                | 13    | $A_2$ | 1          | 14   | $A_1$ | 149       |
| 6142.366631                    | 6142.368983                    | -2.352                                                | $0.2806 \times 10^{-3}$             | $0.2799 \times 10^{-3}$             | 0.256          | 9     | $F_1$ | 2          | 10   | $F_2$ | 333       |
| 6142.475911                    | 6142.476850                    | -0.939                                                | $0.2176 \times 10^{-3}$             | $0.2001 \times 10^{-3}$             | 8.766          | 9     | $E$   | 1          | 10   | $E$   | 221       |
| 6142.688055                    | 6142.687057                    | 0.998                                                 |                                     | $0.1936 \times 10^{-6}$             |                | 5     | $F_2$ | 1          | 6    | $F_1$ | 215       |
| 6142.773021                    | 6142.770086                    | 2.935                                                 |                                     | $0.2165 \times 10^{-4}$             |                | 6     | $F_2$ | 1          | 7    | $F_1$ | 252       |
| 6142.939780                    | 6142.940727                    | -0.947                                                | $0.9529 \times 10^{-5}$             | $0.5434 \times 10^{-6}$             | 1653.429       | 5     | $F_1$ | 2          | 6    | $F_2$ | 223       |
| 6143.015140                    | 6143.012195                    | 2.945                                                 | $0.1873 \times 10^{-3}$             | $0.1879 \times 10^{-3}$             | -0.318         | 9     | $F_2$ | 1          | 10   | $F_1$ | 325       |
| 6143.101000                    | 6143.089233                    | 11.767                                                |                                     | $0.5214 \times 10^{-5}$             |                | 9     | $F_1$ | 2          | 10   | $F_2$ | 334       |
| 6143.187690                    | 6143.177555                    | 10.135                                                | $0.1941 \times 10^{-3}$             | $0.1880 \times 10^{-3}$             | 3.236          | 9     | $F_1$ | 1          | 10   | $F_2$ | 334       |
| 6143.258320                    | 6143.260988                    | -2.668                                                | $0.4724 \times 10^{-4}$             | $0.4976 \times 10^{-4}$             | -5.064         | 6     | $A_2$ | 1          | 7    | $A_1$ | 78        |
| 6143.412883                    | 6143.390053                    | 22.830                                                |                                     | $0.8852 \times 10^{-5}$             |                | 7     | $F_2$ | 2          | 8    | $F_1$ | 267       |
| 6143.449985                    | 6143.428071                    | 21.914                                                |                                     | $0.2133 \times 10^{-5}$             |                | 7     | $F_2$ | 1          | 8    | $F_1$ | 267       |
| 6143.936433                    | 6143.922784                    | 13.649                                                |                                     | $0.6507 \times 10^{-5}$             |                | 9     | $A_2$ | 1          | 10   | $A_1$ | 114       |
| 6144.198143                    | 6144.194489                    | 3.654                                                 | $0.3185 \times 10^{-3}$             | $0.1467 \times 10^{-4}$             | 2071.577       | 6     | $E$   | 1          | 7    | $E$   | 165       |
| 6144.215918                    | 6144.213132                    | 2.786                                                 |                                     | $0.1114 \times 10^{-4}$             |                | 6     | $F_2$ | 2          | 7    | $F_1$ | 253       |
| 6144.237980                    | 6144.234849                    | 3.131                                                 | $0.4372 \times 10^{-3}$             | $0.1966 \times 10^{-4}$             | 2123.892       | 6     | $F_2$ | 1          | 7    | $F_1$ | 253       |
| 6145.039902                    | 6145.016979                    | 22.923                                                | $0.1046 \times 10^{-2}$             | $0.5918 \times 10^{-4}$             | 1667.403       | 6     | $A_2$ | 1          | 7    | $A_1$ | 79        |
| 6145.272968                    | 6145.254085                    | 18.883                                                | $0.7351 \times 10^{-3}$             | $0.6706 \times 10^{-4}$             | 996.233        | 6     | $F_2$ | 2          | 7    | $F_1$ | 254       |
| 6145.295413                    | 6145.275802                    | 19.611                                                |                                     | $0.3277 \times 10^{-5}$             |                | 6     | $F_2$ | 1          | 7    | $F_1$ | 254       |
| 6145.472397                    | 6145.459055                    | 13.342                                                | $0.8763 \times 10^{-3}$             | $0.8381 \times 10^{-4}$             | 945.544        | 6     | $F_1$ | 1          | 7    | $F_2$ | 247       |
| 6145.638805                    | 6145.630639                    | 8.166                                                 | $0.1553 \times 10^{-2}$             | $0.1514 \times 10^{-3}$             | 925.596        | 6     | $A_1$ | 1          | 7    | $A_2$ | 87        |
| 6146.441723                    | 6146.469515                    | -27.792                                               |                                     | $0.1180 \times 10^{-4}$             |                | 7     | $E$   | 1          | 8    | $E$   | 183       |
| 6147.377230                    | 6147.363042                    | 14.188                                                | $0.3073 \times 10^{-4}$             | $0.2793 \times 10^{-4}$             | 10.028         | 7     | $F_2$ | 2          | 8    | $F_1$ | 269       |
| 6147.415720                    | 6147.401061                    | 14.659                                                | $0.3405 \times 10^{-4}$             | $0.1970 \times 10^{-4}$             | 72.843         | 7     | $F_2$ | 1          | 8    | $F_1$ | 269       |
| 6147.987820                    | 6147.979872                    | 7.948                                                 | $0.7530 \times 10^{-3}$             | $0.4715 \times 10^{-3}$             | 59.694         | 8     | $A_1$ | 1          | 9    | $A_2$ | 103       |
| 6148.002982                    | 6147.993333                    | 9.649                                                 |                                     | $0.2763 \times 10^{-3}$             |                | 8     | $F_1$ | 1          | 9    | $F_2$ | 297       |
| 6148.442360                    | 6148.463345                    | -20.985                                               |                                     | $0.1645 \times 10^{-4}$             |                | 7     | $E$   | 1          | 8    | $E$   | 184       |
| 6148.557000                    | 6148.566986                    | -9.986                                                | $0.1253 \times 10^{-4}$             | $0.1261 \times 10^{-4}$             | -0.634         | 7     | $F_1$ | 2          | 8    | $F_2$ | 276       |

Table II (continued).

| $\tilde{\nu}_e/\text{cm}^{-1}$ | $\tilde{\nu}_c/\text{cm}^{-1}$ | $\tilde{\nu}_e - \tilde{\nu}_c/10^{-3}\text{cm}^{-1}$ | $I_e/\text{cm}^{-2}\text{atm}^{-1}$ | $I_c/\text{cm}^{-2}\text{atm}^{-1}$ | $I_e - I_c/\%$ | $J''$ | $C''$ | $\alpha''$ | $J'$ | $C'$  | $\alpha'$ |
|--------------------------------|--------------------------------|-------------------------------------------------------|-------------------------------------|-------------------------------------|----------------|-------|-------|------------|------|-------|-----------|
| 6149.067039                    | 6149.059366                    | 7.673                                                 | $0.4695 \times 10^{-3}$             | $0.4803 \times 10^{-3}$             | -2.252         | 10    | $F_2$ | 3          | 11   | $F_1$ | 363       |
| 6149.254592                    | 6149.243992                    | 10.600                                                | $0.2990 \times 10^{-3}$             | $0.2962 \times 10^{-3}$             | 0.938          | 10    | $E$   | 2          | 11   | $E$   | 239       |
| 6149.438066                    | 6149.424228                    | 13.838                                                | $0.3638 \times 10^{-3}$             | $0.3740 \times 10^{-3}$             | -2.739         | 10    | $F_1$ | 2          | 11   | $F_2$ | 358       |
| 6150.238921                    | 6150.235954                    | 2.967                                                 | $0.4788 \times 10^{-3}$             | $0.4287 \times 10^{-4}$             | 1016.791       | 6     | $A_2$ | 1          | 7    | $A_1$ | 80        |
| 6150.259525                    | 6150.252690                    | 6.835                                                 | $0.3457 \times 10^{-3}$             | $0.2931 \times 10^{-4}$             | 1079.290       | 6     | $F_2$ | 1          | 7    | $F_1$ | 255       |
| 6150.270377                    | 6150.260995                    | 9.382                                                 |                                     | $0.2148 \times 10^{-4}$             |                | 6     | $E$   | 1          | 7    | $E$   | 166       |
| 6150.911100                    | 6150.908031                    | 3.069                                                 | $0.4198 \times 10^{-3}$             | $0.3175 \times 10^{-3}$             | 32.213         | 8     | $F_2$ | 1          | 9    | $F_1$ | 305       |
| 6151.152633                    | 6151.147394                    | 5.239                                                 | $0.3398 \times 10^{-3}$             | $0.2726 \times 10^{-3}$             | 24.674         | 8     | $F_1$ | 2          | 9    | $F_2$ | 298       |
| 6151.202000                    | 6151.180640                    | 21.360                                                |                                     | $0.1161 \times 10^{-4}$             |                | 7     | $F_1$ | 1          | 8    | $F_2$ | 280       |
| 6151.338628                    | 6151.326141                    | 12.487                                                | $0.3694 \times 10^{-4}$             | $0.3290 \times 10^{-5}$             | 1022.850       | 6     | $F_1$ | 1          | 7    | $F_2$ | 248       |
| 6151.533000                    | 6151.535316                    | -2.316                                                | $0.4717 \times 10^{-3}$             | $0.4670 \times 10^{-3}$             | 1.005          | 10    | $A_1$ | 1          | 11   | $A_2$ | 124       |
| 6151.669610                    | 6151.670955                    | -1.345                                                |                                     | $0.3193 \times 10^{-4}$             |                | 10    | $F_1$ | 2          | 11   | $F_2$ | 359       |
| 6151.746110                    | 6151.746435                    | -0.325                                                | $0.2314 \times 10^{-3}$             | $0.2250 \times 10^{-3}$             | 2.860          | 10    | $F_1$ | 1          | 11   | $F_2$ | 359       |
| 6151.811000                    | 6151.813282                    | -2.282                                                |                                     | $0.3607 \times 10^{-5}$             |                | 10    | $F_2$ | 3          | 11   | $F_1$ | 364       |
| 6151.883535                    | 6151.897329                    | -13.794                                               |                                     | $0.9017 \times 10^{-5}$             |                | 6     | $F_2$ | 2          | 7    | $F_1$ | 256       |
| 6151.904686                    | 6151.919045                    | -14.359                                               |                                     | $0.2688 \times 10^{-5}$             |                | 6     | $F_2$ | 1          | 7    | $F_1$ | 256       |
| 6151.929620                    | 6151.928622                    | 0.998                                                 | $0.2328 \times 10^{-3}$             | $0.2341 \times 10^{-3}$             | -0.573         | 10    | $F_2$ | 2          | 11   | $F_1$ | 364       |
| 6152.504090                    | 6152.502722                    | 1.368                                                 | $0.2579 \times 10^{-3}$             | $0.2017 \times 10^{-3}$             | 27.859         | 8     | $E$   | 2          | 9    | $E$   | 200       |
| 6152.525539                    | 6152.516416                    | 9.123                                                 |                                     | $0.5876 \times 10^{-5}$             |                | 10    | $E$   | 2          | 11   | $E$   | 240       |
| 6152.547005                    | 6152.547342                    | -0.337                                                |                                     | $0.2448 \times 10^{-3}$             |                | 10    | $A_2$ | 1          | 11   | $A_1$ | 116       |
| 6152.698209                    | 6152.690457                    | 7.752                                                 | $0.1306 \times 10^{-3}$             | $0.1433 \times 10^{-3}$             | -8.831         | 10    | $F_2$ | 1          | 11   | $F_1$ | 365       |
| 6152.714662                    | 6152.714526                    | 0.136                                                 | $0.3633 \times 10^{-3}$             | $0.2914 \times 10^{-3}$             | 24.653         | 8     | $F_2$ | 2          | 9    | $F_1$ | 306       |
| 6152.747697                    | 6152.737065                    | 10.632                                                | $0.9035 \times 10^{-4}$             | $0.9725 \times 10^{-4}$             | -7.094         | 10    | $E$   | 1          | 11   | $E$   | 240       |
| 6153.395792                    | 6153.389301                    | 6.491                                                 | $0.8802 \times 10^{-5}$             | $0.7597 \times 10^{-5}$             | 15.861         | 7     | $F_1$ | 2          | 8    | $F_2$ | 282       |
| 6153.448940                    | 6153.444992                    | 3.948                                                 | $0.3789 \times 10^{-4}$             | $0.9353 \times 10^{-5}$             | 305.113        | 7     | $F_1$ | 1          | 8    | $F_2$ | 282       |
| 6154.076220                    | 6154.083629                    | -7.409                                                | $0.2456 \times 10^{-4}$             | $0.7901 \times 10^{-5}$             | 210.859        | 7     | $F_2$ | 1          | 8    | $F_1$ | 275       |
| 6154.336990                    | 6154.323296                    | 13.694                                                | $0.5363 \times 10^{-4}$             | $0.1172 \times 10^{-4}$             | 357.416        | 7     | $F_1$ | 1          | 8    | $F_2$ | 283       |
| 6154.633500                    | 6154.617534                    | 15.966                                                |                                     | $0.1310 \times 10^{-4}$             |                | 7     | $F_2$ | 1          | 8    | $F_1$ | 276       |
| 6154.934481                    | 6154.935912                    | -1.431                                                | $0.1025 \times 10^{-4}$             | $0.8901 \times 10^{-5}$             | 15.159         | 8     | $F_2$ | 2          | 9    | $F_1$ | 307       |
| 6154.976164                    | 6154.976306                    | -0.142                                                |                                     | $0.8407 \times 10^{-5}$             |                | 8     | $F_2$ | 1          | 9    | $F_1$ | 307       |
| 6155.196015                    | 6155.206938                    | -10.923                                               | $0.1443 \times 10^{-4}$             | $0.1119 \times 10^{-4}$             | 28.921         | 8     | $F_1$ | 2          | 9    | $F_2$ | 299       |
| 6155.211000                    | 6155.211945                    | -0.945                                                |                                     | $0.1019 \times 10^{-4}$             |                | 11    | $F_1$ | 3          | 12   | $F_2$ | 392       |
| 6155.268210                    | 6155.277997                    | -9.787                                                | $0.1446 \times 10^{-4}$             | $0.6437 \times 10^{-5}$             | 124.632        | 8     | $F_1$ | 1          | 9    | $F_2$ | 299       |
| 6155.304020                    | 6155.304487                    | -0.467                                                | $0.3356 \times 10^{-4}$             | $0.3128 \times 10^{-4}$             | 7.290          | 11    | $F_1$ | 2          | 12   | $F_2$ | 392       |
| 6155.470400                    | 6155.490895                    | -20.495                                               |                                     | $0.2368 \times 10^{-4}$             |                | 8     | $A_1$ | 1          | 9    | $A_2$ | 104       |
| 6155.509660                    | 6155.505357                    | 4.303                                                 |                                     | $0.2015 \times 10^{-4}$             |                | 7     | $F_2$ | 2          | 8    | $F_1$ | 277       |
| 6155.543640                    | 6155.543376                    | 0.264                                                 |                                     | $0.1908 \times 10^{-4}$             |                | 7     | $F_2$ | 1          | 8    | $F_1$ | 277       |
| 6156.584489                    | 6156.577930                    | 6.559                                                 | $0.8386 \times 10^{-3}$             | $0.8487 \times 10^{-4}$             | 888.121        | 7     | $A_2$ | 1          | 8    | $A_1$ | 99        |
| 6157.103846                    | 6157.106710                    | -2.864                                                | $0.3579 \times 10^{-3}$             | $0.4275 \times 10^{-4}$             | 737.150        | 7     | $F_2$ | 2          | 8    | $F_1$ | 278       |
| 6157.141641                    | 6157.144729                    | -3.088                                                | $0.9093 \times 10^{-4}$             | $0.2204 \times 10^{-5}$             | 4024.807       | 7     | $F_2$ | 1          | 8    | $F_1$ | 278       |
| 6157.368910                    | 6157.383709                    | -14.799                                               | $0.5172 \times 10^{-4}$             | $0.7984 \times 10^{-5}$             | 547.776        | 7     | $F_1$ | 2          | 8    | $F_2$ | 285       |
| 6157.425302                    | 6157.439400                    | -14.098                                               |                                     | $0.7638 \times 10^{-5}$             |                | 7     | $F_1$ | 1          | 8    | $F_2$ | 285       |
| 6157.862899                    | 6157.849498                    | 13.401                                                | $0.4029 \times 10^{-3}$             | $0.3498 \times 10^{-4}$             | 1051.762       | 7     | $E$   | 1          | 8    | $E$   | 190       |
| 6157.904241                    | 6157.898585                    | 5.656                                                 | $0.6331 \times 10^{-3}$             | $0.6397 \times 10^{-4}$             | 889.713        | 7     | $F_1$ | 2          | 8    | $F_2$ | 286       |
| 6157.960104                    | 6157.954276                    | 5.828                                                 |                                     | $0.6622 \times 10^{-6}$             |                | 7     | $F_1$ | 1          | 8    | $F_2$ | 286       |
| 6158.041658                    | 6158.055796                    | -14.138                                               |                                     | $0.3789 \times 10^{-3}$             |                | 11    | $F_1$ | 3          | 12   | $F_2$ | 393       |
| 6158.102157                    | 6158.101254                    | 0.903                                                 | $0.2339 \times 10^{-3}$             | $0.1340 \times 10^{-4}$             | 1645.737       | 7     | $F_2$ | 2          | 8    | $F_1$ | 279       |
| 6158.140076                    | 6158.139273                    | 0.803                                                 | $0.1631 \times 10^{-3}$             | $0.3195 \times 10^{-5}$             | 5004.360       | 7     | $F_2$ | 1          | 8    | $F_1$ | 279       |
| 6158.201780                    | 6158.207867                    | -6.087                                                |                                     | $0.2242 \times 10^{-3}$             |                | 11    | $E$   | 2          | 12   | $E$   | 262       |
| 6158.367170                    | 6158.367649                    | -0.479                                                |                                     | $0.3246 \times 10^{-3}$             |                | 11    | $F_2$ | 3          | 12   | $F_1$ | 388       |

Table II (continued).

| $\tilde{\nu}_e/\text{cm}^{-1}$ | $\tilde{\nu}_c/\text{cm}^{-1}$ | $\tilde{\nu}_e - \tilde{\nu}_c/10^{-3}\text{cm}^{-1}$ | $I_e/\text{cm}^{-2}\text{atm}^{-1}$ | $I_c/\text{cm}^{-2}\text{atm}^{-1}$ | $I_e - I_c/\%$ | $J''$ | $C''$ | $\alpha''$ | $J'$ | $C'$  | $\alpha'$ |
|--------------------------------|--------------------------------|-------------------------------------------------------|-------------------------------------|-------------------------------------|----------------|-------|-------|------------|------|-------|-----------|
| 6158.453412                    | 6158.446746                    | 6.666                                                 |                                     | $0.2327 \times 10^{-3}$             |                | 9     | $F_1$ | 1          | 10   | $F_2$ | 335       |
| 6161.110460                    | 6161.114356                    | -3.896                                                | $0.1206 \times 10^{-3}$             | $0.1149 \times 10^{-3}$             | 4.959          | 11    | $E$   | 1          | 12   | $E$   | 263       |
| 6161.255460                    | 6161.258454                    | -2.994                                                | $0.1732 \times 10^{-3}$             | $0.1725 \times 10^{-3}$             | 0.408          | 11    | $F_2$ | 2          | 12   | $F_1$ | 389       |
| 6161.512204                    | 6161.509581                    | 2.623                                                 | $0.3036 \times 10^{-3}$             | $0.3027 \times 10^{-3}$             | 0.302          | 11    | $A_2$ | 1          | 12   | $A_1$ | 136       |
| 6161.890508                    | 6161.886895                    | 3.613                                                 | $0.1943 \times 10^{-3}$             | $0.1733 \times 10^{-3}$             | 12.139         | 9     | $E$   | 1          | 10   | $E$   | 223       |
| 6161.944448                    | 6161.940479                    | 3.969                                                 | $0.2378 \times 10^{-3}$             | $0.2371 \times 10^{-3}$             | 0.299          | 9     | $F_1$ | 2          | 10   | $F_2$ | 336       |
| 6162.063914                    | 6162.059156                    | 4.758                                                 | $0.3489 \times 10^{-3}$             | $0.3626 \times 10^{-3}$             | -3.779         | 9     | $A_1$ | 1          | 10   | $A_2$ | 109       |
| 6162.160571                    | 6162.160717                    | -0.146                                                | $0.9896 \times 10^{-4}$             | $0.1031 \times 10^{-3}$             | -4.035         | 11    | $F_2$ | 1          | 12   | $F_1$ | 390       |
| 6162.240110                    | 6162.233215                    | 6.895                                                 | $0.8274 \times 10^{-4}$             | $0.1047 \times 10^{-3}$             | -20.980        | 11    | $F_1$ | 1          | 12   | $F_2$ | 395       |
| 6163.523344                    | 6163.511159                    | 12.185                                                | $0.2963 \times 10^{-3}$             | $0.2959 \times 10^{-4}$             | 901.267        | 7     | $F_1$ | 1          | 8    | $F_2$ | 287       |
| 6163.541010                    | 6163.538001                    | 3.009                                                 | $0.2627 \times 10^{-3}$             | $0.2655 \times 10^{-4}$             | 889.371        | 7     | $F_2$ | 1          | 8    | $F_1$ | 280       |
| 6163.776590                    | 6163.773038                    | 3.552                                                 | $0.2162 \times 10^{-3}$             | $0.2235 \times 10^{-3}$             | -3.278         | 9     | $F_1$ | 3          | 10   | $F_2$ | 337       |
| 6163.827710                    | 6163.822758                    | 4.952                                                 | $0.2150 \times 10^{-4}$             | $0.2408 \times 10^{-4}$             | -10.700        | 9     | $F_1$ | 2          | 10   | $F_2$ | 337       |
| 6163.906736                    | 6163.905597                    | 1.139                                                 | $0.4161 \times 10^{-5}$             | $0.6268 \times 10^{-5}$             | -33.619        | 8     | $F_1$ | 1          | 9    | $F_2$ | 306       |
| 6164.119330                    | 6164.117377                    | 1.953                                                 | $0.2085 \times 10^{-3}$             | $0.2248 \times 10^{-3}$             | -7.230         | 9     | $F_2$ | 2          | 10   | $F_1$ | 328       |
| 6164.233460                    | 6164.221325                    | 12.135                                                |                                     | $0.7472 \times 10^{-4}$             |                | 8     | $A_1$ | 1          | 9    | $A_2$ | 106       |
| 6164.504172                    | 6164.496358                    | 7.814                                                 |                                     | $0.6800 \times 10^{-5}$             |                | 8     | $F_1$ | 2          | 9    | $F_2$ | 307       |
| 6164.579311                    | 6164.567416                    | 11.895                                                | $0.1392 \times 10^{-4}$             | $0.1254 \times 10^{-4}$             | 11.012         | 8     | $F_1$ | 1          | 9    | $F_2$ | 307       |
| 6164.629511                    | 6164.634894                    | -5.383                                                | $0.3623 \times 10^{-3}$             | $0.3977 \times 10^{-3}$             | -8.905         | 9     | $A_2$ | 1          | 10   | $A_1$ | 115       |
| 6165.019675                    | 6165.033524                    | -13.849                                               | $0.7312 \times 10^{-4}$             | $0.7213 \times 10^{-5}$             | 913.667        | 7     | $F_2$ | 2          | 8    | $F_1$ | 281       |
| 6165.101487                    | 6165.109792                    | -8.305                                                | $0.3014 \times 10^{-3}$             | $0.2577 \times 10^{-4}$             | 1069.750       | 7     | $A_2$ | 1          | 8    | $A_1$ | 100       |
| 6166.319790                    | 6166.318700                    | 1.090                                                 | $0.9238 \times 10^{-4}$             | $0.1722 \times 10^{-4}$             | 436.347        | 8     | $F_1$ | 1          | 9    | $F_2$ | 309       |
| 6166.541610                    | 6166.534292                    | 7.318                                                 | $0.2379 \times 10^{-4}$             | $0.1010 \times 10^{-4}$             | 135.626        | 8     | $F_2$ | 2          | 9    | $F_1$ | 317       |
| 6166.579570                    | 6166.574687                    | 4.883                                                 | $0.3511 \times 10^{-4}$             | $0.9839 \times 10^{-5}$             | 256.845        | 8     | $F_2$ | 1          | 9    | $F_1$ | 317       |
| 6166.868466                    | 6166.914960                    | -46.494                                               | $0.4467 \times 10^{-3}$             | $0.4701 \times 10^{-3}$             | -4.982         | 12    | $A_1$ | 2          | 13   | $A_2$ | 142       |
| 6167.136345                    | 6167.173904                    | -37.559                                               | $0.2281 \times 10^{-3}$             | $0.2427 \times 10^{-3}$             | -6.018         | 12    | $F_2$ | 3          | 13   | $F_1$ | 427       |
| 6167.280450                    | 6167.308136                    | -27.686                                               |                                     | $0.4022 \times 10^{-3}$             |                | 12    | $A_2$ | 1          | 13   | $A_1$ | 138       |
| 6167.605550                    | 6167.592313                    | 13.237                                                | $0.1881 \times 10^{-4}$             | $0.5715 \times 10^{-5}$             | 229.123        | 8     | $F_2$ | 2          | 9    | $F_1$ | 318       |
| 6167.644930                    | 6167.632708                    | 12.222                                                | $0.8323 \times 10^{-4}$             | $0.1008 \times 10^{-4}$             | 725.741        | 8     | $F_2$ | 1          | 9    | $F_1$ | 318       |
| 6168.908112                    | 6168.910805                    | -2.693                                                |                                     | $0.2987 \times 10^{-3}$             |                | 10    | $A_2$ | 1          | 11   | $A_1$ | 117       |
| 6169.920920                    | 6169.921307                    | -0.387                                                |                                     | $0.7391 \times 10^{-5}$             |                | 8     | $F_2$ | 2          | 9    | $F_1$ | 320       |
| 6169.956820                    | 6169.961702                    | -4.882                                                | $0.2149 \times 10^{-3}$             | $0.2315 \times 10^{-4}$             | 828.304        | 8     | $F_2$ | 1          | 9    | $F_1$ | 320       |
| 6170.039680                    | 6170.070333                    | -30.653                                               | $0.1016 \times 10^{-3}$             | $0.1018 \times 10^{-3}$             | -0.153         | 12    | $E$   | 2          | 13   | $E$   | 281       |
| 6170.288920                    | 6170.298946                    | -10.026                                               | $0.2188 \times 10^{-3}$             | $0.2606 \times 10^{-4}$             | 739.637        | 8     | $E$   | 2          | 9    | $E$   | 209       |
| 6170.374900                    | 6170.384588                    | -9.688                                                |                                     | $0.1032 \times 10^{-5}$             |                | 8     | $E$   | 1          | 9    | $E$   | 209       |
| 6170.446630                    | 6170.466974                    | -20.344                                               | $0.1172 \times 10^{-3}$             | $0.1206 \times 10^{-3}$             | -2.827         | 12    | $F_1$ | 2          | 13   | $F_2$ | 420       |
| 6170.780385                    | 6170.792554                    | -12.169                                               | $0.1181 \times 10^{-3}$             | $0.1227 \times 10^{-3}$             | -3.758         | 12    | $F_2$ | 1          | 13   | $F_1$ | 429       |
| 6171.225449                    | 6171.254767                    | -29.318                                               | $0.2632 \times 10^{-3}$             | $0.8598 \times 10^{-5}$             | 2961.251       | 8     | $A_1$ | 1          | 9    | $A_2$ | 108       |
| 6171.651670                    | 6171.662549                    | -10.879                                               | $0.6564 \times 10^{-4}$             | $0.7044 \times 10^{-4}$             | -6.817         | 12    | $F_1$ | 1          | 13   | $F_2$ | 421       |
| 6171.707070                    | 6171.713164                    | -6.094                                                | $0.1101 \times 10^{-3}$             | $0.1181 \times 10^{-3}$             | -6.742         | 12    | $A_1$ | 1          | 13   | $A_2$ | 144       |
| 6172.808780                    | 6172.822317                    | -13.537                                               |                                     | $0.1131 \times 10^{-4}$             |                | 10    | $F_1$ | 2          | 11   | $F_2$ | 361       |
| 6172.851370                    | 6172.862584                    | -11.214                                               | $0.1740 \times 10^{-3}$             | $0.1961 \times 10^{-3}$             | -11.267        | 10    | $F_2$ | 2          | 11   | $F_1$ | 368       |
| 6172.885660                    | 6172.897797                    | -12.137                                               | $0.1466 \times 10^{-3}$             | $0.1726 \times 10^{-3}$             | -15.083        | 10    | $F_1$ | 1          | 11   | $F_2$ | 361       |
| 6174.906843                    | 6174.904443                    | 2.400                                                 | $0.2791 \times 10^{-3}$             | $0.3532 \times 10^{-3}$             | -20.977        | 10    | $A_1$ | 1          | 11   | $A_2$ | 125       |
| 6175.126510                    | 6175.132630                    | -6.120                                                | $0.1214 \times 10^{-3}$             | $0.1559 \times 10^{-3}$             | -22.115        | 10    | $F_1$ | 2          | 11   | $F_2$ | 362       |
| 6175.202060                    | 6175.208110                    | -6.050                                                | $0.2564 \times 10^{-4}$             | $0.2323 \times 10^{-4}$             | 10.381         | 10    | $F_1$ | 1          | 11   | $F_2$ | 362       |
| 6176.992501                    | 6176.981975                    | 10.526                                                | $0.3770 \times 10^{-3}$             | $0.4009 \times 10^{-4}$             | 840.414        | 8     | $A_1$ | 1          | 9    | $A_2$ | 109       |
| 6177.016284                    | 6177.014559                    | 1.725                                                 |                                     | $0.2262 \times 10^{-4}$             |                | 8     | $F_1$ | 1          | 9    | $F_2$ | 314       |
| 6177.028102                    | 6177.032008                    | -3.906                                                |                                     | $0.1454 \times 10^{-4}$             |                | 8     | $E$   | 1          | 9    | $E$   | 211       |
| 6177.413736                    | 6177.412858                    | 0.878                                                 |                                     | $0.4499 \times 10^{-5}$             |                | 9     | $F_1$ | 2          | 10   | $F_2$ | 346       |

Table II (continued).

| $\tilde{\nu}_e/\text{cm}^{-1}$ | $\tilde{\nu}_c/\text{cm}^{-1}$ | $\tilde{\nu}_e - \tilde{\nu}_c/10^{-3}\text{cm}^{-1}$ | $I_e/\text{cm}^{-2}\text{atm}^{-1}$ | $I_c/\text{cm}^{-2}\text{atm}^{-1}$ | $I_e - I_c/\%$ | $J''$ | $C''$ | $\alpha''$ | $J'$ | $C'$  | $\alpha'$ |
|--------------------------------|--------------------------------|-------------------------------------------------------|-------------------------------------|-------------------------------------|----------------|-------|-------|------------|------|-------|-----------|
| 6177.501480                    | 6177.501180                    | 0.300                                                 |                                     | $0.2041 \times 10^{-4}$             |                | 9     | $F_1$ | 1          | 10   | $F_2$ | 346       |
| 6177.601903                    | 6177.606050                    | -4.147                                                |                                     | $0.1011 \times 10^{-4}$             |                | 9     | $F_2$ | 2          | 10   | $F_1$ | 339       |
| 6177.747480                    | 6177.750766                    | -3.286                                                | $0.3848 \times 10^{-4}$             | $0.2101 \times 10^{-4}$             | 83.148         | 9     | $F_2$ | 1          | 10   | $F_1$ | 339       |
| 6177.821440                    | 6177.839476                    | -18.036                                               |                                     | $0.4017 \times 10^{-4}$             |                | 9     | $A_2$ | 1          | 10   | $A_1$ | 119       |
| 6178.906774                    | 6178.929786                    | -23.012                                               |                                     | $0.1331 \times 10^{-4}$             |                | 9     | $F_1$ | 3          | 10   | $F_2$ | 348       |
| 6179.043530                    | 6179.067828                    | -24.298                                               | $0.2198 \times 10^{-4}$             | $0.8040 \times 10^{-7}$             | 27239.212      | 9     | $F_1$ | 1          | 10   | $F_2$ | 348       |
| 6180.324750                    | 6180.331438                    | -6.688                                                | $0.8352 \times 10^{-4}$             | $0.2789 \times 10^{-4}$             | 199.412        | 9     | $F_1$ | 3          | 10   | $F_2$ | 349       |
| 6180.374020                    | 6180.381158                    | -7.138                                                | $0.9817 \times 10^{-4}$             | $0.1443 \times 10^{-4}$             | 580.278        | 9     | $F_1$ | 2          | 10   | $F_2$ | 349       |
| 6180.594733                    | 6180.611676                    | -16.943                                               | $0.4462 \times 10^{-3}$             | $0.1267 \times 10^{-3}$             | 252.208        | 9     | $A_1$ | 1          | 10   | $A_2$ | 113       |
| 6180.650721                    | 6180.657409                    | -6.688                                                | $0.3298 \times 10^{-3}$             | $0.8440 \times 10^{-4}$             | 290.750        | 9     | $A_2$ | 1          | 10   | $A_1$ | 120       |
| 6181.121500                    | 6181.147773                    | -26.273                                               | $0.1370 \times 10^{-3}$             | $0.3014 \times 10^{-4}$             | 354.543        | 9     | $F_2$ | 2          | 10   | $F_1$ | 342       |
| 6181.400290                    | 6181.405572                    | -5.282                                                |                                     | $0.1717 \times 10^{-4}$             |                | 9     | $F_1$ | 3          | 10   | $F_2$ | 350       |
| 6183.632920                    | 6183.635378                    | -2.458                                                | $0.6292 \times 10^{-4}$             | $0.1010 \times 10^{-4}$             | 522.707        | 9     | $F_1$ | 3          | 10   | $F_2$ | 351       |
| 6183.683330                    | 6183.685097                    | -1.767                                                | $0.6121 \times 10^{-4}$             | $0.1314 \times 10^{-4}$             | 365.991        | 9     | $F_1$ | 2          | 10   | $F_2$ | 351       |
| 6183.801840                    | 6183.859741                    | -57.901                                               |                                     | $0.2376 \times 10^{-3}$             |                | 11    | $A_2$ | 1          | 12   | $A_1$ | 137       |
| 6184.397668                    | 6184.416398                    | -18.730                                               | $0.1202 \times 10^{-3}$             | $0.1039 \times 10^{-4}$             | 1057.346       | 9     | $F_2$ | 2          | 10   | $F_1$ | 344       |
| 6184.490596                    | 6184.502861                    | -12.265                                               | $0.2522 \times 10^{-3}$             | $0.2058 \times 10^{-4}$             | 1125.310       | 9     | $A_2$ | 1          | 10   | $A_1$ | 121       |
| 6184.539138                    | 6184.561114                    | -21.976                                               |                                     | $0.1853 \times 10^{-5}$             |                | 9     | $F_2$ | 1          | 10   | $F_1$ | 344       |
| 6189.828430                    | 6189.899492                    | -71.062                                               |                                     | $0.1482 \times 10^{-3}$             |                | 12    | $A_1$ | 1          | 13   | $A_2$ | 145       |
| 6190.586430                    | 6190.658445                    | -72.015                                               | $0.1034 \times 10^{-3}$             | $0.4980 \times 10^{-4}$             | 107.641        | 10    | $A_1$ | 1          | 11   | $A_2$ | 129       |
| 6190.685020                    | 6190.697382                    | -12.362                                               | $0.1585 \times 10^{-3}$             | $0.1634 \times 10^{-4}$             | 870.298        | 9     | $F_1$ | 1          | 10   | $F_2$ | 354       |
| 6190.705990                    | 6190.723051                    | -17.061                                               | $0.1513 \times 10^{-3}$             | $0.1561 \times 10^{-4}$             | 869.214        | 9     | $F_2$ | 1          | 10   | $F_1$ | 346       |
| 6191.132090                    | 6191.105746                    | 26.344                                                |                                     | $0.4276 \times 10^{-4}$             |                | 10    | $A_2$ | 1          | 11   | $A_1$ | 121       |
| 6191.746695                    | 6191.777292                    | -30.597                                               | $0.3156 \times 10^{-4}$             | $0.2584 \times 10^{-4}$             | 22.135         | 10    | $F_2$ | 3          | 11   | $F_1$ | 381       |
| 6191.862947                    | 6191.892632                    | -29.685                                               |                                     | $0.1307 \times 10^{-4}$             |                | 10    | $F_2$ | 2          | 11   | $F_1$ | 381       |
| 6191.979965                    | 6192.010052                    | -30.087                                               |                                     | $0.3136 \times 10^{-6}$             |                | 10    | $F_2$ | 1          | 11   | $F_1$ | 381       |
| 6192.066190                    | 6192.122447                    | -56.257                                               | $0.4834 \times 10^{-4}$             | $0.3281 \times 10^{-4}$             | 47.338         | 10    | $E$   | 2          | 11   | $E$   | 250       |
| 6192.286180                    | 6192.343096                    | -56.916                                               |                                     | $0.6751 \times 10^{-7}$             |                | 10    | $E$   | 1          | 11   | $E$   | 250       |
| 6192.816866                    | 6192.813472                    | 3.394                                                 | $0.1027 \times 10^{-3}$             | $0.4418 \times 10^{-4}$             | 132.478        | 10    | $F_1$ | 2          | 11   | $F_2$ | 376       |
| 6192.891969                    | 6192.888952                    | 3.017                                                 | $0.5265 \times 10^{-4}$             | $0.1718 \times 10^{-4}$             | 206.433        | 10    | $F_1$ | 1          | 11   | $F_2$ | 376       |
| 6192.950430                    | 6192.905061                    | 45.369                                                | $0.3317 \times 10^{-4}$             | $0.4376 \times 10^{-5}$             | 658.012        | 10    | $E$   | 2          | 11   | $E$   | 251       |
| 6193.552771                    | 6193.567194                    | -14.423                                               | $0.1338 \times 10^{-3}$             | $0.3117 \times 10^{-4}$             | 329.195        | 10    | $F_2$ | 3          | 11   | $F_1$ | 383       |
| 6204.547000                    | 6204.588914                    | -41.914                                               |                                     | $0.6805 \times 10^{-5}$             |                | 10    | $E$   | 1          | 11   | $E$   | 255       |
| 6204.560100                    | 6204.597461                    | -37.361                                               |                                     | $0.1009 \times 10^{-4}$             |                | 10    | $F_2$ | 1          | 11   | $F_1$ | 388       |
| 6204.573600                    | 6204.614956                    | -41.356                                               |                                     | $0.1641 \times 10^{-4}$             |                | 10    | $A_2$ | 1          | 11   | $A_1$ | 124       |
